# Supplementary material for: A DNA target-enrichment approach to detect mutations, copy number changes and immunoglobulin translocations in multiple myeloma
Source: PubMed Central journal article supplement (PMC5056967; doi:10.1038/bcj.2016.72), 2016-09-02
Supplement: bcj201672x4.pdf [file bcj201672x4.pdf]

| <b>Name</b> | <b>Tissue</b> |
|-------------|---------------|
| ARH-77      | MM            |
| KMS-12-BM   | MM            |
| L-363       | MM            |
| LP-1        | MM            |
| OPM-2       | MM            |
| RPMI-8226   | MM            |
| SK-MM-2     | MM            |
| U-266       | MM            |
| CTV-1       | MM            |
| IM-9        | MM            |
| KMS-11      | MM            |
| MC-CAR      | MM            |
| MM1S        | MM            |
| NCI-H929    | MM            |
| EHEB        | CLL           |
| JVM-3       | CLL           |
| HL-60       | AML           |
| KASUMI-1    | AML           |
| CESS        | ALL           |
| MN-60       | ALL           |
| BALL-1      | ALL           |
| KARPAS-45   | ALL           |
| K-562       | CML           |
| RPMI-8866   | CML           |
