# Supplementary material for: A DNA target-enrichment approach to detect mutations, copy number changes and immunoglobulin translocations in multiple myeloma
Source: PubMed Central journal article supplement (PMC5056967; doi:10.1038/bcj.2016.72), 2016-09-02
Supplement: bcj201672x5.pdf [file bcj201672x5.pdf]

| Chromosome | Start    | End      |
|------------|----------|----------|
| chr1       | 776486   | 776606   |
| chr1       | 3786185  | 3786305  |
| chr1       | 6790886  | 6791006  |
| chr1       | 9795659  | 9795779  |
| chr1       | 12806136 | 12806256 |
| chr1       | 15808707 | 15808827 |
| chr1       | 16174503 | 16174703 |
| chr1       | 16199290 | 16199650 |
| chr1       | 16200589 | 16200909 |
| chr1       | 16202674 | 16203194 |
| chr1       | 16235755 | 16236035 |
| chr1       | 16237575 | 16237815 |
| chr1       | 16242558 | 16242838 |
| chr1       | 16245363 | 16245603 |
| chr1       | 16245835 | 16246075 |
| chr1       | 16247301 | 16247541 |
| chr1       | 16248673 | 16248913 |
| chr1       | 16254556 | 16262476 |
| chr1       | 16262507 | 16262787 |
| chr1       | 16263638 | 16264158 |
| chr1       | 16264283 | 16264523 |
| chr1       | 16265151 | 16265431 |
| chr1       | 16265736 | 16265976 |
| chr1       | 18815274 | 18815394 |
| chr1       | 21821697 | 21821817 |
| chr1       | 23885400 | 23885560 |
| chr1       | 23885607 | 23885927 |
| chr1       | 24018216 | 24018416 |
| chr1       | 24019033 | 24019313 |
| chr1       | 24020229 | 24020469 |
| chr1       | 24021098 | 24021338 |
| chr1       | 24022234 | 24022474 |
| chr1       | 24022768 | 24022928 |
| chr1       | 24827769 | 24827889 |
| chr1       | 27019951 | 27020071 |
| chr1       | 27021634 | 27021754 |
| chr1       | 27022882 | 27024042 |
| chr1       | 27029490 | 27029610 |
| chr1       | 27030958 | 27031078 |
| chr1       | 27041570 | 27041795 |
| chr1       | 27041956 | 27042076 |
| chr1       | 27049760 | 27049880 |

|      |          |          |
|------|----------|----------|
| chr1 | 27051995 | 27052227 |
| chr1 | 27054768 | 27054888 |
| chr1 | 27056127 | 27056367 |
| chr1 | 27057628 | 27058108 |
| chr1 | 27059124 | 27059324 |
| chr1 | 27067356 | 27067476 |
| chr1 | 27068141 | 27068261 |
| chr1 | 27068960 | 27069080 |
| chr1 | 27087326 | 27087606 |
| chr1 | 27087819 | 27088019 |
| chr1 | 27088586 | 27088866 |
| chr1 | 27089459 | 27089779 |
| chr1 | 27092664 | 27093102 |
| chr1 | 27093596 | 27093716 |
| chr1 | 27094265 | 27094505 |
| chr1 | 27097593 | 27097833 |
| chr1 | 27098936 | 27099176 |
| chr1 | 27099250 | 27099530 |
| chr1 | 27099791 | 27100440 |
| chr1 | 27100805 | 27101725 |
| chr1 | 27102012 | 27102526 |
| chr1 | 27105500 | 27107260 |
| chr1 | 27853399 | 27853519 |
| chr1 | 30861795 | 30861915 |
| chr1 | 33895794 | 33895914 |
| chr1 | 36897743 | 36897863 |
| chr1 | 39908666 | 39908786 |
| chr1 | 42908788 | 42908908 |
| chr1 | 43803478 | 43803638 |
| chr1 | 43803715 | 43803955 |
| chr1 | 43804161 | 43804441 |
| chr1 | 43804930 | 43805250 |
| chr1 | 43805575 | 43805855 |
| chr1 | 43806000 | 43806240 |
| chr1 | 43812067 | 43812347 |
| chr1 | 43812413 | 43812653 |
| chr1 | 43814473 | 43814713 |
| chr1 | 43814884 | 43815164 |
| chr1 | 43817830 | 43818030 |
| chr1 | 43818175 | 43818455 |
| chr1 | 45794923 | 45795163 |
| chr1 | 45796128 | 45796288 |
| chr1 | 45796789 | 45797279 |

|      |          |          |
|------|----------|----------|
| chr1 | 45797306 | 45797546 |
| chr1 | 45797626 | 45798690 |
| chr1 | 45798705 | 45799056 |
| chr1 | 45799059 | 45799299 |
| chr1 | 45800002 | 45800242 |
| chr1 | 45805518 | 45805678 |
| chr1 | 45805828 | 45805988 |
| chr1 | 45953973 | 45954093 |
| chr1 | 48986485 | 48986605 |
| chr1 | 50088758 | 50088878 |
| chr1 | 50595922 | 50596042 |
| chr1 | 51103221 | 51103341 |
| chr1 | 51427504 | 51427624 |
| chr1 | 51435984 | 51436224 |
| chr1 | 51437186 | 51437306 |
| chr1 | 51438304 | 51438424 |
| chr1 | 51438820 | 51438940 |
| chr1 | 51439553 | 51439953 |
| chr1 | 51440032 | 51440152 |
| chr1 | 51441900 | 51442020 |
| chr1 | 51443380 | 51443500 |
| chr1 | 51448098 | 51448218 |
| chr1 | 51449033 | 51449153 |
| chr1 | 51449514 | 51449634 |
| chr1 | 51450419 | 51450581 |
| chr1 | 51450659 | 51450779 |
| chr1 | 51452502 | 51452622 |
| chr1 | 51457954 | 51458074 |
| chr1 | 51632903 | 51633023 |
| chr1 | 52016663 | 52016783 |
| chr1 | 52034752 | 52034872 |
| chr1 | 52431751 | 52431871 |
| chr1 | 52836078 | 52836198 |
| chr1 | 53320213 | 53320333 |
| chr1 | 53808597 | 53808717 |
| chr1 | 54320322 | 54320442 |
| chr1 | 54831740 | 54831860 |
| chr1 | 55046332 | 55046452 |
| chr1 | 55333392 | 55333512 |
| chr1 | 55828579 | 55828699 |
| chr1 | 56325896 | 56326016 |
| chr1 | 56826158 | 56826278 |
| chr1 | 58068059 | 58068179 |

|      |          |          |
|------|----------|----------|
| chr1 | 61140956 | 61141076 |
| chr1 | 64153592 | 64153712 |
| chr1 | 65885508 | 65885628 |
| chr1 | 67159598 | 67159718 |
| chr1 | 70176185 | 70176305 |
| chr1 | 73239110 | 73239230 |
| chr1 | 74941232 | 74941352 |
| chr1 | 76251951 | 76252071 |
| chr1 | 79264668 | 79264788 |
| chr1 | 82276526 | 82276646 |
| chr1 | 84722609 | 84722729 |
| chr1 | 85298051 | 85298171 |
| chr1 | 88327700 | 88327820 |
| chr1 | 91444132 | 91444252 |
| chr1 | 93297572 | 93297772 |
| chr1 | 93298880 | 93299279 |
| chr1 | 93300282 | 93300522 |
| chr1 | 93301729 | 93301969 |
| chr1 | 93302961 | 93303241 |
| chr1 | 93306051 | 93306251 |
| chr1 | 93307272 | 93307472 |
| chr1 | 94465401 | 94465521 |
| chr1 | 95633916 | 95634036 |
| chr1 | 97543704 | 97543824 |
| chr1 | 99127237 | 99127517 |
| chr1 | 99128216 | 99128416 |
| chr1 | 99129442 | 99129562 |
| chr1 | 99141387 | 99141507 |
| chr1 | 99144415 | 99144535 |
| chr1 | 99150391 | 99150671 |
| chr1 | 99156585 | 99156785 |
| chr1 | 99157032 | 99157312 |
| chr1 | 99161032 | 99161312 |
| chr1 | 99164221 | 99164501 |
| chr1 | 99167315 | 99167515 |
| chr1 | 99173620 | 99173740 |
| chr1 | 99179877 | 99179997 |
| chr1 | 99180117 | 99180237 |
| chr1 | 99180794 | 99181017 |
| chr1 | 99196658 | 99196890 |
| chr1 | 99198928 | 99199048 |
| chr1 | 99199893 | 99200013 |
| chr1 | 99202461 | 99202581 |

|      |           |           |
|------|-----------|-----------|
| chr1 | 99203748  | 99203988  |
| chr1 | 99207517  | 99207637  |
| chr1 | 99209480  | 99209728  |
| chr1 | 99209935  | 99210055  |
| chr1 | 99210697  | 99210817  |
| chr1 | 99225007  | 99225127  |
| chr1 | 99225568  | 99225728  |
| chr1 | 100592593 | 100592713 |
| chr1 | 103612009 | 103612129 |
| chr1 | 106687889 | 106688009 |
| chr1 | 109714343 | 109714463 |
| chr1 | 112721855 | 112721975 |
| chr1 | 115241795 | 115241915 |
| chr1 | 115242376 | 115242496 |
| chr1 | 115251115 | 115251378 |
| chr1 | 115251548 | 115251668 |
| chr1 | 115252149 | 115252389 |
| chr1 | 115254346 | 115254466 |
| chr1 | 115255656 | 115255776 |
| chr1 | 115256369 | 115256728 |
| chr1 | 115257460 | 115257580 |
| chr1 | 115258625 | 115258825 |
| chr1 | 115259707 | 115259827 |
| chr1 | 115262063 | 115262183 |
| chr1 | 115263617 | 115263882 |
| chr1 | 115264002 | 115264122 |
| chr1 | 115266245 | 115266365 |
| chr1 | 115737159 | 115737279 |
| chr1 | 116717495 | 116717721 |
| chr1 | 117273516 | 117273636 |
| chr1 | 117746150 | 117746270 |
| chr1 | 118155992 | 118156112 |
| chr1 | 118158026 | 118158146 |
| chr1 | 118161999 | 118162119 |
| chr1 | 118164733 | 118164853 |
| chr1 | 118165152 | 118165312 |
| chr1 | 118165392 | 118166678 |
| chr1 | 118166689 | 118166809 |
| chr1 | 118166816 | 118166936 |
| chr1 | 118167138 | 118167258 |
| chr1 | 118172160 | 118172280 |
| chr1 | 118172477 | 118172597 |
| chr1 | 118174161 | 118174281 |

|      |           |           |
|------|-----------|-----------|
| chr1 | 118242803 | 118242923 |
| chr1 | 118744163 | 118744283 |
| chr1 | 118760110 | 118760230 |
| chr1 | 119277778 | 119277898 |
| chr1 | 119799604 | 119799724 |
| chr1 | 120309380 | 120309500 |
| chr1 | 120457922 | 120459322 |
| chr1 | 120460236 | 120460436 |
| chr1 | 120460982 | 120461222 |
| chr1 | 120461925 | 120462245 |
| chr1 | 120462795 | 120463075 |
| chr1 | 120464283 | 120464483 |
| chr1 | 120464843 | 120465083 |
| chr1 | 120465209 | 120465449 |
| chr1 | 120466253 | 120466613 |
| chr1 | 120467920 | 120468440 |
| chr1 | 120469077 | 120469277 |
| chr1 | 120471596 | 120471836 |
| chr1 | 120478040 | 120478280 |
| chr1 | 120479856 | 120480136 |
| chr1 | 120480436 | 120480676 |
| chr1 | 120483158 | 120483398 |
| chr1 | 120484142 | 120484382 |
| chr1 | 120490992 | 120491232 |
| chr1 | 120491589 | 120491789 |
| chr1 | 120493303 | 120493503 |
| chr1 | 120496118 | 120496358 |
| chr1 | 120497618 | 120497898 |
| chr1 | 120501969 | 120502169 |
| chr1 | 120506193 | 120506433 |
| chr1 | 120508032 | 120508232 |
| chr1 | 120508955 | 120509155 |
| chr1 | 120510009 | 120510289 |
| chr1 | 120510657 | 120510897 |
| chr1 | 120512130 | 120512370 |
| chr1 | 120529523 | 120529763 |
| chr1 | 120539607 | 120539967 |
| chr1 | 120547941 | 120548221 |
| chr1 | 120572469 | 120572669 |
| chr1 | 120611903 | 120612063 |
| chr1 | 121164546 | 121164666 |
| chr1 | 121184837 | 121184957 |
| chr1 | 144474481 | 144474602 |

|      |           |           |
|------|-----------|-----------|
| chr1 | 145092905 | 145093025 |
| chr1 | 145588475 | 145588595 |
| chr1 | 145736399 | 145736519 |
| chr1 | 146535341 | 146535461 |
| chr1 | 147048539 | 147048659 |
| chr1 | 147375904 | 147376024 |
| chr1 | 147743557 | 147743677 |
| chr1 | 150000104 | 150000224 |
| chr1 | 150749853 | 150749973 |
| chr1 | 153753665 | 153753785 |
| chr1 | 154554813 | 154554973 |
| chr1 | 154557260 | 154557540 |
| chr1 | 154557636 | 154557876 |
| chr1 | 154558164 | 154558404 |
| chr1 | 154558627 | 154558867 |
| chr1 | 154560547 | 154560787 |
| chr1 | 154560967 | 154561207 |
| chr1 | 154561791 | 154561991 |
| chr1 | 154562178 | 154562458 |
| chr1 | 154562632 | 154562912 |
| chr1 | 154569255 | 154569495 |
| chr1 | 154569530 | 154569810 |
| chr1 | 154570237 | 154570517 |
| chr1 | 154570849 | 154571089 |
| chr1 | 154573489 | 154575129 |
| chr1 | 154580374 | 154580574 |
| chr1 | 154600262 | 154600542 |
| chr1 | 156754405 | 156754525 |
| chr1 | 159802567 | 159802687 |
| chr1 | 160129424 | 160129544 |
| chr1 | 160626322 | 160626442 |
| chr1 | 161162112 | 161162232 |
| chr1 | 162148638 | 162148758 |
| chr1 | 162640588 | 162640708 |
| chr1 | 162813591 | 162813711 |
| chr1 | 163126356 | 163126476 |
| chr1 | 163587294 | 163587414 |
| chr1 | 164081994 | 164082114 |
| chr1 | 164568545 | 164568665 |
| chr1 | 165080972 | 165081092 |
| chr1 | 165589476 | 165589596 |
| chr1 | 165835304 | 165835424 |
| chr1 | 166037848 | 166037968 |

|      |           |           |
|------|-----------|-----------|
| chr1 | 168849913 | 168850033 |
| chr1 | 169676425 | 169676545 |
| chr1 | 171794847 | 171794967 |
| chr1 | 171901745 | 171901865 |
| chr1 | 174971622 | 174971742 |
| chr1 | 177989267 | 177989387 |
| chr1 | 181002419 | 181002539 |
| chr1 | 184002814 | 184002934 |
| chr1 | 187005250 | 187005370 |
| chr1 | 190010185 | 190010305 |
| chr1 | 193054094 | 193054214 |
| chr1 | 193091282 | 193091522 |
| chr1 | 193094165 | 193094405 |
| chr1 | 193099227 | 193099427 |
| chr1 | 193104451 | 193104772 |
| chr1 | 193107158 | 193107358 |
| chr1 | 193110967 | 193111207 |
| chr1 | 193116945 | 193117145 |
| chr1 | 193119372 | 193119572 |
| chr1 | 193121441 | 193121641 |
| chr1 | 193172873 | 193173033 |
| chr1 | 193181132 | 193181292 |
| chr1 | 193181463 | 193181663 |
| chr1 | 193202063 | 193202343 |
| chr1 | 193205315 | 193205555 |
| chr1 | 193218790 | 193219070 |
| chr1 | 193219743 | 193219903 |
| chr1 | 196061651 | 196061771 |
| chr1 | 199102550 | 199102670 |
| chr1 | 202116178 | 202116298 |
| chr1 | 202698112 | 202698352 |
| chr1 | 202698814 | 202699174 |
| chr1 | 202699993 | 202700233 |
| chr1 | 202700911 | 202701111 |
| chr1 | 202702511 | 202703031 |
| chr1 | 202704515 | 202704755 |
| chr1 | 202705290 | 202705570 |
| chr1 | 202709750 | 202709990 |
| chr1 | 202710492 | 202710852 |
| chr1 | 202711475 | 202711675 |
| chr1 | 202711737 | 202711977 |
| chr1 | 202714927 | 202715167 |
| chr1 | 202715220 | 202715500 |



|      |           |           |
|------|-----------|-----------|
| chr1 | 202718029 | 202718309 |
| chr1 | 202719746 | 202719946 |
| chr1 | 202721973 | 202722253 |
| chr1 | 202724349 | 202724629 |
| chr1 | 202725444 | 202725684 |
| chr1 | 202727478 | 202727678 |
| chr1 | 202729501 | 202729741 |
| chr1 | 202731781 | 202731981 |
| chr1 | 202733124 | 202733324 |
| chr1 | 202735478 | 202735678 |
| chr1 | 202736000 | 202736240 |
| chr1 | 202742190 | 202742470 |
| chr1 | 202743681 | 202743921 |
| chr1 | 202746103 | 202746263 |
| chr1 | 202777211 | 202777451 |
| chr1 | 204452719 | 204452839 |
| chr1 | 204494575 | 204494775 |
| chr1 | 204495405 | 204495605 |
| chr1 | 204499758 | 204499998 |
| chr1 | 204501266 | 204501426 |
| chr1 | 204501861 | 204502021 |
| chr1 | 204505946 | 204506146 |
| chr1 | 204506491 | 204506691 |
| chr1 | 204506980 | 204507180 |
| chr1 | 204507286 | 204507486 |
| chr1 | 204511851 | 204512131 |
| chr1 | 204513597 | 204513877 |
| chr1 | 204515864 | 204516064 |
| chr1 | 204518225 | 204518825 |
| chr1 | 204522429 | 204522549 |
| chr1 | 204527708 | 204527868 |
| chr1 | 204551770 | 204551890 |
| chr1 | 204566939 | 204567059 |
| chr1 | 204586987 | 204587107 |
| chr1 | 205127999 | 205128119 |
| chr1 | 208130567 | 208130687 |
| chr1 | 211187603 | 211187723 |
| chr1 | 214192634 | 214192754 |
| chr1 | 217199081 | 217199201 |
| chr1 | 220218406 | 220218526 |
| chr1 | 223240251 | 223240371 |
| chr1 | 226242712 | 226242832 |
| chr1 | 229260583 | 229260703 |

|      |           |           |
|------|-----------|-----------|
| chr1 | 232269174 | 232269294 |
| chr1 | 235324537 | 235324777 |
| chr1 | 235331783 | 235332023 |
| chr1 | 235335885 | 235336125 |
| chr1 | 235338486 | 235338726 |
| chr1 | 235340111 | 235340311 |
| chr1 | 235341071 | 235341271 |
| chr1 | 235344883 | 235346123 |
| chr1 | 235349047 | 235349167 |
| chr1 | 235354457 | 235354577 |
| chr1 | 235357286 | 235357566 |
| chr1 | 235359287 | 235359487 |
| chr1 | 235359721 | 235359841 |
| chr1 | 235362899 | 235363019 |
| chr1 | 235363847 | 235363967 |
| chr1 | 235371484 | 235371604 |
| chr1 | 235375758 | 235375878 |
| chr1 | 235377072 | 235377352 |
| chr1 | 235383055 | 235383335 |
| chr1 | 235383598 | 235383878 |
| chr1 | 235384053 | 235384173 |
| chr1 | 235384777 | 235385028 |
| chr1 | 235386427 | 235386627 |
| chr1 | 235387793 | 235387913 |
| chr1 | 235387973 | 235388133 |
| chr1 | 235392502 | 235392742 |
| chr1 | 235394385 | 235394545 |
| chr1 | 235397687 | 235397847 |
| chr1 | 235403576 | 235403816 |
| chr1 | 235409680 | 235409880 |
| chr1 | 235416004 | 235416164 |
| chr1 | 235418919 | 235419119 |
| chr1 | 235420427 | 235420587 |
| chr1 | 235423911 | 235424111 |
| chr1 | 235429846 | 235429966 |
| chr1 | 235438626 | 235438746 |
| chr1 | 235466523 | 235466643 |
| chr1 | 235478751 | 235478871 |
| chr1 | 235489123 | 235489243 |
| chr1 | 235490131 | 235490331 |
| chr1 | 237048439 | 237048559 |
| chr1 | 238388862 | 238388982 |
| chr1 | 240492673 | 240492793 |

|      |           |           |
|------|-----------|-----------|
| chr1 | 241399944 | 241400064 |
| chr1 | 244404774 | 244404894 |
| chr1 | 247404851 | 247404971 |
| chr2 | 78943     | 79063     |
| chr2 | 3078961   | 3079081   |
| chr2 | 6087010   | 6087130   |
| chr2 | 9133509   | 9133629   |
| chr2 | 9347176   | 9347416   |
| chr2 | 9419401   | 9419561   |
| chr2 | 9437381   | 9437621   |
| chr2 | 9458609   | 9458769   |
| chr2 | 9460361   | 9460521   |
| chr2 | 9463194   | 9463434   |
| chr2 | 9467897   | 9468097   |
| chr2 | 9474824   | 9474984   |
| chr2 | 9475164   | 9475364   |
| chr2 | 9484612   | 9484812   |
| chr2 | 9484814   | 9484974   |
| chr2 | 9490880   | 9491080   |
| chr2 | 9496119   | 9496530   |
| chr2 | 9498831   | 9499071   |
| chr2 | 9508500   | 9508700   |
| chr2 | 9514838   | 9515118   |
| chr2 | 9516979   | 9517179   |
| chr2 | 9519030   | 9519230   |
| chr2 | 9520823   | 9520983   |
| chr2 | 9525330   | 9525530   |
| chr2 | 9528408   | 9528688   |
| chr2 | 9531137   | 9531377   |
| chr2 | 9533553   | 9533833   |
| chr2 | 9540096   | 9540256   |
| chr2 | 9540814   | 9541014   |
| chr2 | 9541343   | 9541583   |
| chr2 | 9543338   | 9543498   |
| chr2 | 9796730   | 9796850   |
| chr2 | 12145952  | 12146072  |
| chr2 | 15148278  | 15148398  |
| chr2 | 16036308  | 16036428  |
| chr2 | 16082171  | 16082691  |
| chr2 | 16082729  | 16082849  |
| chr2 | 16082867  | 16083067  |
| chr2 | 16084357  | 16084477  |
| chr2 | 16085431  | 16085631  |

|      |          |          |
|------|----------|----------|
| chr2 | 16085640 | 16086240 |
| chr2 | 16088820 | 16088940 |
| chr2 | 16098333 | 16098453 |
| chr2 | 16111244 | 16111364 |
| chr2 | 16112768 | 16112888 |
| chr2 | 16127862 | 16127982 |
| chr2 | 16136862 | 16136982 |
| chr2 | 18214397 | 18214517 |
| chr2 | 21218941 | 21219061 |
| chr2 | 24288715 | 24288835 |
| chr2 | 25457078 | 25457358 |
| chr2 | 25458514 | 25458754 |
| chr2 | 25459739 | 25459939 |
| chr2 | 25461941 | 25462141 |
| chr2 | 25462290 | 25462450 |
| chr2 | 25463104 | 25463384 |
| chr2 | 25463453 | 25463653 |
| chr2 | 25464363 | 25464643 |
| chr2 | 25466708 | 25466908 |
| chr2 | 25466995 | 25467235 |
| chr2 | 25467344 | 25467584 |
| chr2 | 25468061 | 25468261 |
| chr2 | 25468830 | 25469243 |
| chr2 | 25469426 | 25469706 |
| chr2 | 25469853 | 25470093 |
| chr2 | 25470398 | 25470678 |
| chr2 | 25470893 | 25471133 |
| chr2 | 25472459 | 25472659 |
| chr2 | 25474964 | 25475164 |
| chr2 | 25497742 | 25498022 |
| chr2 | 25498310 | 25498470 |
| chr2 | 25505238 | 25505598 |
| chr2 | 25522939 | 25523179 |
| chr2 | 25536717 | 25536917 |
| chr2 | 27290465 | 27290585 |
| chr2 | 29416078 | 29416798 |
| chr2 | 29419531 | 29419780 |
| chr2 | 29420255 | 29420594 |
| chr2 | 29429967 | 29430207 |
| chr2 | 29430810 | 29431010 |
| chr2 | 29432597 | 29432797 |
| chr2 | 29436798 | 29436998 |
| chr2 | 29443516 | 29443756 |

|      |          |          |
|------|----------|----------|
| chr2 | 29443838 | 29444118 |
| chr2 | 29445141 | 29445527 |
| chr2 | 29446180 | 29446420 |
| chr2 | 29448258 | 29448498 |
| chr2 | 29449723 | 29450003 |
| chr2 | 29450388 | 29450588 |
| chr2 | 29451720 | 29451960 |
| chr2 | 29453775 | 29453895 |
| chr2 | 29455101 | 29455381 |
| chr2 | 29456376 | 29456616 |
| chr2 | 29462480 | 29462760 |
| chr2 | 29473911 | 29474191 |
| chr2 | 29497908 | 29498148 |
| chr2 | 29498214 | 29498414 |
| chr2 | 29512615 | 29512735 |
| chr2 | 29519698 | 29519978 |
| chr2 | 29541099 | 29541339 |
| chr2 | 29543562 | 29543802 |
| chr2 | 29551161 | 29551401 |
| chr2 | 29606541 | 29606781 |
| chr2 | 29672880 | 29673000 |
| chr2 | 29754761 | 29755001 |
| chr2 | 29791781 | 29791901 |
| chr2 | 29917657 | 29917937 |
| chr2 | 29940381 | 29940621 |
| chr2 | 29966810 | 29966930 |
| chr2 | 29986514 | 29986634 |
| chr2 | 30026905 | 30027025 |
| chr2 | 30035542 | 30035662 |
| chr2 | 30048950 | 30049070 |
| chr2 | 30111780 | 30111900 |
| chr2 | 30142831 | 30143551 |
| chr2 | 30299976 | 30300096 |
| chr2 | 33300675 | 33300795 |
| chr2 | 36304569 | 36304689 |
| chr2 | 39403950 | 39404070 |
| chr2 | 42418523 | 42418643 |
| chr2 | 45420022 | 45420142 |
| chr2 | 48423838 | 48423958 |
| chr2 | 49189860 | 49189980 |
| chr2 | 51488365 | 51488485 |
| chr2 | 54502852 | 54502972 |
| chr2 | 57515988 | 57516108 |

|      |          |          |
|------|----------|----------|
| chr2 | 60518290 | 60518410 |
| chr2 | 61705907 | 61706147 |
| chr2 | 61708267 | 61708467 |
| chr2 | 61709474 | 61709714 |
| chr2 | 61710038 | 61710278 |
| chr2 | 61711015 | 61711295 |
| chr2 | 61712859 | 61713139 |
| chr2 | 61713468 | 61713588 |
| chr2 | 61715252 | 61715452 |
| chr2 | 61715674 | 61715954 |
| chr2 | 61717723 | 61717963 |
| chr2 | 61719111 | 61719391 |
| chr2 | 61719417 | 61719932 |
| chr2 | 61719998 | 61720238 |
| chr2 | 61720987 | 61721267 |
| chr2 | 61722548 | 61722788 |
| chr2 | 61723957 | 61724197 |
| chr2 | 61725767 | 61726103 |
| chr2 | 61726798 | 61727078 |
| chr2 | 61727154 | 61727274 |
| chr2 | 61729072 | 61729317 |
| chr2 | 61729334 | 61729494 |
| chr2 | 61731417 | 61731537 |
| chr2 | 61732043 | 61732163 |
| chr2 | 61735385 | 61735505 |
| chr2 | 61747062 | 61747182 |
| chr2 | 61749467 | 61749587 |
| chr2 | 61749629 | 61749861 |
| chr2 | 61752093 | 61752213 |
| chr2 | 61753474 | 61753714 |
| chr2 | 61756842 | 61756962 |
| chr2 | 61757660 | 61757780 |
| chr2 | 61760849 | 61761089 |
| chr2 | 63518412 | 63518532 |
| chr2 | 66567339 | 66567459 |
| chr2 | 68166019 | 68166139 |
| chr2 | 69578232 | 69578352 |
| chr2 | 72789492 | 72789612 |
| chr2 | 75802091 | 75802211 |
| chr2 | 78805771 | 78805891 |
| chr2 | 81832646 | 81832766 |
| chr2 | 84833205 | 84833325 |
| chr2 | 88319664 | 88319784 |

|      |           |           |
|------|-----------|-----------|
| chr2 | 91812774  | 91812894  |
| chr2 | 95536940  | 95537060  |
| chr2 | 97193274  | 97193394  |
| chr2 | 97197204  | 97197324  |
| chr2 | 97198725  | 97198845  |
| chr2 | 97199616  | 97199736  |
| chr2 | 97201621  | 97201741  |
| chr2 | 97202182  | 97202302  |
| chr2 | 97202465  | 97202665  |
| chr2 | 97202978  | 97203218  |
| chr2 | 97206348  | 97206468  |
| chr2 | 97207260  | 97207380  |
| chr2 | 97208244  | 97208364  |
| chr2 | 97212603  | 97212843  |
| chr2 | 97213096  | 97213296  |
| chr2 | 97215006  | 97215246  |
| chr2 | 97215435  | 97215595  |
| chr2 | 97215873  | 97216073  |
| chr2 | 97216270  | 97216510  |
| chr2 | 97216822  | 97218062  |
| chr2 | 97218306  | 97218426  |
| chr2 | 98543502  | 98543622  |
| chr2 | 101546656 | 101546776 |
| chr2 | 102314490 | 102314650 |
| chr2 | 102314887 | 102315047 |
| chr2 | 102320579 | 102320699 |
| chr2 | 102322708 | 102322828 |
| chr2 | 102325192 | 102325312 |
| chr2 | 102331110 | 102331230 |
| chr2 | 102336845 | 102336965 |
| chr2 | 102343001 | 102343121 |
| chr2 | 102348616 | 102348736 |
| chr2 | 102350969 | 102351089 |
| chr2 | 102359862 | 102359982 |
| chr2 | 102367501 | 102367621 |
| chr2 | 102374898 | 102375018 |
| chr2 | 102378473 | 102378593 |
| chr2 | 102391515 | 102391635 |
| chr2 | 102396902 | 102397022 |
| chr2 | 102403105 | 102403225 |
| chr2 | 102407129 | 102407289 |
| chr2 | 102412525 | 102412645 |
| chr2 | 102413685 | 102413885 |

|      |           |           |
|------|-----------|-----------|
| chr2 | 102415076 | 102415196 |
| chr2 | 102421917 | 102422037 |
| chr2 | 102429588 | 102429708 |
| chr2 | 102438785 | 102438905 |
| chr2 | 102440105 | 102440225 |
| chr2 | 102440332 | 102440572 |
| chr2 | 102441735 | 102441935 |
| chr2 | 102443760 | 102443880 |
| chr2 | 102443981 | 102444101 |
| chr2 | 102445910 | 102446110 |
| chr2 | 102447159 | 102447279 |
| chr2 | 102448127 | 102448367 |
| chr2 | 102450817 | 102450977 |
| chr2 | 102452320 | 102452480 |
| chr2 | 102456228 | 102456508 |
| chr2 | 102457029 | 102457149 |
| chr2 | 102459026 | 102459186 |
| chr2 | 102460547 | 102460787 |
| chr2 | 102462513 | 102462633 |
| chr2 | 102467562 | 102467682 |
| chr2 | 102472379 | 102472659 |
| chr2 | 102475400 | 102475600 |
| chr2 | 102476095 | 102476335 |
| chr2 | 102477227 | 102477507 |
| chr2 | 102478968 | 102479088 |
| chr2 | 102480277 | 102480517 |
| chr2 | 102481344 | 102481544 |
| chr2 | 102482845 | 102483085 |
| chr2 | 102483626 | 102483826 |
| chr2 | 102486031 | 102486311 |
| chr2 | 102486696 | 102486936 |
| chr2 | 102487911 | 102488191 |
| chr2 | 102490067 | 102490267 |
| chr2 | 102490488 | 102490768 |
| chr2 | 102493416 | 102493656 |
| chr2 | 102495686 | 102495806 |
| chr2 | 102498959 | 102499199 |
| chr2 | 102500275 | 102500395 |
| chr2 | 102501598 | 102501798 |
| chr2 | 102503496 | 102503776 |
| chr2 | 102504199 | 102504439 |
| chr2 | 102505207 | 102505447 |
| chr2 | 102507569 | 102507769 |



|      |           |           |
|------|-----------|-----------|
| chr2 | 104563834 | 104563954 |
| chr2 | 107641838 | 107641958 |
| chr2 | 110859612 | 110859732 |
| chr2 | 113862113 | 113862233 |
| chr2 | 116867536 | 116867656 |
| chr2 | 119886858 | 119886978 |
| chr2 | 122966097 | 122966217 |
| chr2 | 126042807 | 126042927 |
| chr2 | 129052292 | 129052412 |
| chr2 | 132077319 | 132077439 |
| chr2 | 135080509 | 135080629 |
| chr2 | 138080635 | 138080755 |
| chr2 | 140990704 | 140990944 |
| chr2 | 140992303 | 140992503 |
| chr2 | 140995672 | 140995912 |
| chr2 | 140996955 | 140997155 |
| chr2 | 141004612 | 141004772 |
| chr2 | 141026793 | 141026993 |
| chr2 | 141027762 | 141027962 |
| chr2 | 141031939 | 141032219 |
| chr2 | 141055317 | 141055597 |
| chr2 | 141072445 | 141072725 |
| chr2 | 141079474 | 141079714 |
| chr2 | 141081408 | 141081688 |
| chr2 | 141083288 | 141083488 |
| chr2 | 141091974 | 141092174 |
| chr2 | 141093175 | 141093415 |
| chr2 | 141108346 | 141108626 |
| chr2 | 141110481 | 141110737 |
| chr2 | 141113857 | 141114097 |
| chr2 | 141115496 | 141115736 |
| chr2 | 141116332 | 141116572 |
| chr2 | 141122170 | 141122410 |
| chr2 | 141128224 | 141128464 |
| chr2 | 141128700 | 141128900 |
| chr2 | 141130521 | 141130761 |
| chr2 | 141135701 | 141135901 |
| chr2 | 141143419 | 141143619 |
| chr2 | 141200032 | 141200232 |
| chr2 | 141201858 | 141202058 |
| chr2 | 141202089 | 141202289 |
| chr2 | 141208083 | 141208283 |
| chr2 | 141213977 | 141214217 |

|      |           |           |
|------|-----------|-----------|
| chr2 | 141214985 | 141215265 |
| chr2 | 141232666 | 141232946 |
| chr2 | 141242862 | 141243142 |
| chr2 | 141245126 | 141245366 |
| chr2 | 141250119 | 141250319 |
| chr2 | 141253085 | 141253365 |
| chr2 | 141259209 | 141259489 |
| chr2 | 141260481 | 141260721 |
| chr2 | 141264305 | 141264545 |
| chr2 | 141267440 | 141267680 |
| chr2 | 141272181 | 141272381 |
| chr2 | 141274398 | 141274638 |
| chr2 | 141283367 | 141283607 |
| chr2 | 141283762 | 141283962 |
| chr2 | 141291549 | 141291749 |
| chr2 | 141294093 | 141294333 |
| chr2 | 141298484 | 141298724 |
| chr2 | 141299303 | 141299583 |
| chr2 | 141356181 | 141356421 |
| chr2 | 141358973 | 141359253 |
| chr2 | 141457804 | 141458204 |
| chr2 | 141459231 | 141459471 |
| chr2 | 141459665 | 141459905 |
| chr2 | 141459938 | 141460178 |
| chr2 | 141473486 | 141473726 |
| chr2 | 141474197 | 141474437 |
| chr2 | 141526727 | 141526967 |
| chr2 | 141528392 | 141528632 |
| chr2 | 141533616 | 141533856 |
| chr2 | 141571180 | 141571420 |
| chr2 | 141597506 | 141597706 |
| chr2 | 141598433 | 141598713 |
| chr2 | 141607664 | 141607904 |
| chr2 | 141609166 | 141609406 |
| chr2 | 141625140 | 141625420 |
| chr2 | 141625609 | 141625889 |
| chr2 | 141641367 | 141641607 |
| chr2 | 141643665 | 141643945 |
| chr2 | 141660471 | 141660751 |
| chr2 | 141665425 | 141665665 |
| chr2 | 141680484 | 141680764 |
| chr2 | 141707747 | 141708027 |
| chr2 | 141709368 | 141709568 |

|      |           |           |
|------|-----------|-----------|
| chr2 | 141739686 | 141739886 |
| chr2 | 141747043 | 141747283 |
| chr2 | 141751513 | 141751753 |
| chr2 | 141762844 | 141763084 |
| chr2 | 141771079 | 141771359 |
| chr2 | 141773254 | 141773494 |
| chr2 | 141777440 | 141777720 |
| chr2 | 141806552 | 141806792 |
| chr2 | 141812636 | 141812876 |
| chr2 | 141816397 | 141816677 |
| chr2 | 141819610 | 141819850 |
| chr2 | 141945930 | 141946210 |
| chr2 | 141986740 | 141987020 |
| chr2 | 142004738 | 142004978 |
| chr2 | 142012050 | 142012250 |
| chr2 | 142237913 | 142238153 |
| chr2 | 142567788 | 142568028 |
| chr2 | 142888157 | 142888357 |
| chr2 | 144139478 | 144139598 |
| chr2 | 147155523 | 147155643 |
| chr2 | 150204318 | 150204438 |
| chr2 | 152342220 | 152342500 |
| chr2 | 152346417 | 152346657 |
| chr2 | 152346818 | 152347098 |
| chr2 | 152348142 | 152348342 |
| chr2 | 152348583 | 152348823 |
| chr2 | 152348834 | 152349074 |
| chr2 | 152349809 | 152350009 |
| chr2 | 152350234 | 152350434 |
| chr2 | 152350620 | 152350820 |
| chr2 | 152352735 | 152352935 |
| chr2 | 152353400 | 152353600 |
| chr2 | 152354085 | 152354285 |
| chr2 | 152354681 | 152354921 |
| chr2 | 152355791 | 152355991 |
| chr2 | 152357850 | 152358050 |
| chr2 | 152359253 | 152359453 |
| chr2 | 152359808 | 152360008 |
| chr2 | 152361937 | 152362137 |
| chr2 | 152362625 | 152362825 |
| chr2 | 152363354 | 152363594 |
| chr2 | 152364450 | 152364690 |
| chr2 | 152369178 | 152369418 |

|      |           |           |
|------|-----------|-----------|
| chr2 | 152370030 | 152370270 |
| chr2 | 152370766 | 152371006 |
| chr2 | 152371266 | 152371506 |
| chr2 | 152372904 | 152373144 |
| chr2 | 152374763 | 152375003 |
| chr2 | 152375410 | 152375650 |
| chr2 | 152376139 | 152376379 |
| chr2 | 152380756 | 152381187 |
| chr2 | 152381611 | 152381851 |
| chr2 | 152382406 | 152382843 |
| chr2 | 152383363 | 152383603 |
| chr2 | 152383926 | 152384166 |
| chr2 | 152385655 | 152385895 |
| chr2 | 152387441 | 152387681 |
| chr2 | 152388237 | 152388477 |
| chr2 | 152389887 | 152390127 |
| chr2 | 152390660 | 152390900 |
| chr2 | 152392136 | 152392376 |
| chr2 | 152393577 | 152393817 |
| chr2 | 152394317 | 152394557 |
| chr2 | 152394585 | 152394825 |
| chr2 | 152396789 | 152397029 |
| chr2 | 152397142 | 152397382 |
| chr2 | 152397892 | 152398132 |
| chr2 | 152402336 | 152402576 |
| chr2 | 152402807 | 152403007 |
| chr2 | 152403874 | 152404319 |
| chr2 | 152404755 | 152404995 |
| chr2 | 152406081 | 152406321 |
| chr2 | 152408185 | 152408425 |
| chr2 | 152409117 | 152409357 |
| chr2 | 152409843 | 152410083 |
| chr2 | 152410320 | 152410560 |
| chr2 | 152411397 | 152411637 |
| chr2 | 152417039 | 152417279 |
| chr2 | 152417449 | 152417893 |
| chr2 | 152418555 | 152418795 |
| chr2 | 152419103 | 152419343 |
| chr2 | 152420056 | 152420510 |
| chr2 | 152421462 | 152421702 |
| chr2 | 152421946 | 152422401 |
| chr2 | 152423657 | 152424017 |
| chr2 | 152424518 | 152424758 |

|      |           |           |
|------|-----------|-----------|
| chr2 | 152424760 | 152425000 |
| chr2 | 152425080 | 152425280 |
| chr2 | 152425713 | 152425953 |
| chr2 | 152426570 | 152426930 |
| chr2 | 152426942 | 152427182 |
| chr2 | 152432140 | 152432380 |
| chr2 | 152432646 | 152432886 |
| chr2 | 152435827 | 152436187 |
| chr2 | 152437244 | 152437484 |
| chr2 | 152437928 | 152438168 |
| chr2 | 152438959 | 152439199 |
| chr2 | 152439944 | 152440304 |
| chr2 | 152441954 | 152442194 |
| chr2 | 152442850 | 152443090 |
| chr2 | 152443869 | 152444109 |
| chr2 | 152446378 | 152446738 |
| chr2 | 152447795 | 152448035 |
| chr2 | 152448479 | 152448719 |
| chr2 | 152449511 | 152449751 |
| chr2 | 152450496 | 152450856 |
| chr2 | 152452507 | 152452747 |
| chr2 | 152453403 | 152453643 |
| chr2 | 152454422 | 152454662 |
| chr2 | 152456931 | 152457291 |
| chr2 | 152458348 | 152458588 |
| chr2 | 152459032 | 152459272 |
| chr2 | 152460064 | 152460304 |
| chr2 | 152461049 | 152461409 |
| chr2 | 152463053 | 152463293 |
| chr2 | 152463949 | 152464189 |
| chr2 | 152464968 | 152465208 |
| chr2 | 152466298 | 152466658 |
| chr2 | 152466963 | 152467203 |
| chr2 | 152467207 | 152467447 |
| chr2 | 152468681 | 152468921 |
| chr2 | 152470765 | 152471125 |
| chr2 | 152472449 | 152472689 |
| chr2 | 152473809 | 152474049 |
| chr2 | 152474770 | 152475010 |
| chr2 | 152475940 | 152476300 |
| chr2 | 152477366 | 152477606 |
| chr2 | 152481979 | 152482219 |
| chr2 | 152483497 | 152483737 |

|      |           |           |
|------|-----------|-----------|
| chr2 | 152484012 | 152484372 |
| chr2 | 152485986 | 152486226 |
| chr2 | 152487160 | 152487400 |
| chr2 | 152487638 | 152487878 |
| chr2 | 152490143 | 152490503 |
| chr2 | 152492674 | 152492914 |
| chr2 | 152495725 | 152495965 |
| chr2 | 152496352 | 152496592 |
| chr2 | 152496844 | 152497204 |
| chr2 | 152499021 | 152499450 |
| chr2 | 152499645 | 152499885 |
| chr2 | 152500307 | 152500667 |
| chr2 | 152500915 | 152501155 |
| chr2 | 152502575 | 152502815 |
| chr2 | 152506671 | 152506911 |
| chr2 | 152507063 | 152507423 |
| chr2 | 152510439 | 152510679 |
| chr2 | 152511763 | 152511963 |
| chr2 | 152512313 | 152512553 |
| chr2 | 152512642 | 152513002 |
| chr2 | 152514430 | 152514670 |
| chr2 | 152515510 | 152515750 |
| chr2 | 152518631 | 152518871 |
| chr2 | 152520037 | 152520397 |
| chr2 | 152520948 | 152521188 |
| chr2 | 152521204 | 152521444 |
| chr2 | 152521829 | 152522069 |
| chr2 | 152522579 | 152522939 |
| chr2 | 152524254 | 152524494 |
| chr2 | 152525472 | 152525712 |
| chr2 | 152527519 | 152527759 |
| chr2 | 152528858 | 152529218 |
| chr2 | 152530924 | 152531164 |
| chr2 | 152531732 | 152531972 |
| chr2 | 152534061 | 152534301 |
| chr2 | 152534365 | 152534725 |
| chr2 | 152536168 | 152536603 |
| chr2 | 152537192 | 152537392 |
| chr2 | 152539109 | 152539349 |
| chr2 | 152541270 | 152541510 |
| chr2 | 152543869 | 152544313 |
| chr2 | 152544737 | 152544977 |
| chr2 | 152547189 | 152547389 |

|      |           |           |
|------|-----------|-----------|
| chr2 | 152548309 | 152549054 |
| chr2 | 152550773 | 152551209 |
| chr2 | 152552023 | 152552263 |
| chr2 | 152553099 | 152553299 |
| chr2 | 152553593 | 152554229 |
| chr2 | 152563332 | 152563572 |
| chr2 | 152566103 | 152566343 |
| chr2 | 152566879 | 152567119 |
| chr2 | 152572460 | 152572660 |
| chr2 | 152573861 | 152574101 |
| chr2 | 152579827 | 152580067 |
| chr2 | 152580705 | 152580945 |
| chr2 | 152581302 | 152581542 |
| chr2 | 152581900 | 152582140 |
| chr2 | 152584192 | 152584432 |
| chr2 | 152586069 | 152586229 |
| chr2 | 152589572 | 152589732 |
| chr2 | 153211224 | 153211344 |
| chr2 | 156312058 | 156312178 |
| chr2 | 159316523 | 159316643 |
| chr2 | 159694688 | 159694808 |
| chr2 | 162551658 | 162551778 |
| chr2 | 165558192 | 165558312 |
| chr2 | 168559935 | 168560055 |
| chr2 | 171564989 | 171565109 |
| chr2 | 174584557 | 174584677 |
| chr2 | 177595802 | 177595922 |
| chr2 | 178095484 | 178096764 |
| chr2 | 178097095 | 178097335 |
| chr2 | 178097846 | 178098126 |
| chr2 | 178098705 | 178099025 |
| chr2 | 178129201 | 178129361 |
| chr2 | 179871111 | 179871231 |
| chr2 | 180603977 | 180604097 |
| chr2 | 182543394 | 182543514 |
| chr2 | 183679361 | 183679481 |
| chr2 | 186807208 | 186807328 |
| chr2 | 189849713 | 189849833 |
| chr2 | 192965879 | 192965999 |
| chr2 | 195974303 | 195974423 |
| chr2 | 198256985 | 198257225 |
| chr2 | 198257683 | 198257923 |
| chr2 | 198260775 | 198261055 |

|      |           |           |
|------|-----------|-----------|
| chr2 | 198262654 | 198262894 |
| chr2 | 198263124 | 198263364 |
| chr2 | 198263642 | 198263802 |
| chr2 | 198264734 | 198265206 |
| chr2 | 198265429 | 198265669 |
| chr2 | 198266066 | 198266306 |
| chr2 | 198266418 | 198266658 |
| chr2 | 198266661 | 198266901 |
| chr2 | 198267274 | 198267554 |
| chr2 | 198267615 | 198267815 |
| chr2 | 198268258 | 198268538 |
| chr2 | 198269750 | 198269950 |
| chr2 | 198269957 | 198270237 |
| chr2 | 198272662 | 198272902 |
| chr2 | 198273078 | 198273318 |
| chr2 | 198274492 | 198274732 |
| chr2 | 198281409 | 198281689 |
| chr2 | 198283192 | 198283352 |
| chr2 | 198283565 | 198283765 |
| chr2 | 198285043 | 198285323 |
| chr2 | 198285704 | 198285904 |
| chr2 | 198288474 | 198288754 |
| chr2 | 198299609 | 198299809 |
| chr2 | 198977761 | 198977881 |
| chr2 | 201983367 | 201983487 |
| chr2 | 202122909 | 202123149 |
| chr2 | 202123369 | 202123489 |
| chr2 | 202124942 | 202125062 |
| chr2 | 202126877 | 202126997 |
| chr2 | 202127656 | 202127776 |
| chr2 | 202127802 | 202127922 |
| chr2 | 202128557 | 202128677 |
| chr2 | 202131168 | 202131528 |
| chr2 | 202132046 | 202132166 |
| chr2 | 202134180 | 202134380 |
| chr2 | 202136191 | 202136391 |
| chr2 | 202137309 | 202137549 |
| chr2 | 202137562 | 202137722 |
| chr2 | 202138301 | 202138421 |
| chr2 | 202139563 | 202139723 |
| chr2 | 202141500 | 202141740 |
| chr2 | 202142971 | 202143091 |
| chr2 | 202143155 | 202143275 |



|      |           |           |
|------|-----------|-----------|
| chr2 | 202143867 | 202143987 |
| chr2 | 202149529 | 202150049 |
| chr2 | 202151129 | 202151369 |
| chr2 | 204988972 | 204989092 |
| chr2 | 207992095 | 207992215 |
| chr2 | 209101747 | 209101947 |
| chr2 | 209103735 | 209104015 |
| chr2 | 209104516 | 209104796 |
| chr2 | 209106653 | 209106933 |
| chr2 | 209108099 | 209108379 |
| chr2 | 209109975 | 209110215 |
| chr2 | 209113076 | 209113396 |
| chr2 | 209116094 | 209116334 |
| chr2 | 211059989 | 211060109 |
| chr2 | 211138749 | 211138869 |
| chr2 | 214156325 | 214156445 |
| chr2 | 217184655 | 217184775 |
| chr2 | 220191801 | 220191921 |
| chr2 | 223251404 | 223251524 |
| chr2 | 226273430 | 226273550 |
| chr2 | 229296905 | 229297025 |
| chr2 | 231090508 | 231090668 |
| chr2 | 231097062 | 231097182 |
| chr2 | 231101746 | 231102026 |
| chr2 | 231102871 | 231103156 |
| chr2 | 231103172 | 231103292 |
| chr2 | 231103431 | 231103631 |
| chr2 | 231106060 | 231106260 |
| chr2 | 231107084 | 231107204 |
| chr2 | 231107768 | 231107888 |
| chr2 | 231107892 | 231108012 |
| chr2 | 231108067 | 231108187 |
| chr2 | 231108385 | 231108585 |
| chr2 | 231109648 | 231109848 |
| chr2 | 231110536 | 231110696 |
| chr2 | 231111361 | 231111481 |
| chr2 | 231112585 | 231112825 |
| chr2 | 231113541 | 231113741 |
| chr2 | 231115635 | 231115835 |
| chr2 | 231117981 | 231118181 |
| chr2 | 231120106 | 231120306 |
| chr2 | 231130826 | 231130946 |
| chr2 | 231134189 | 231134389 |

|      |           |           |
|------|-----------|-----------|
| chr2 | 231134509 | 231134709 |
| chr2 | 231135247 | 231135407 |
| chr2 | 231149013 | 231149173 |
| chr2 | 231150406 | 231150606 |
| chr2 | 231152563 | 231152723 |
| chr2 | 231155126 | 231155326 |
| chr2 | 231155643 | 231155763 |
| chr2 | 231157311 | 231157551 |
| chr2 | 231158929 | 231159089 |
| chr2 | 231162076 | 231162236 |
| chr2 | 231174596 | 231174796 |
| chr2 | 231175411 | 231175611 |
| chr2 | 231175827 | 231175987 |
| chr2 | 231176118 | 231176358 |
| chr2 | 231177249 | 231177449 |
| chr2 | 231181021 | 231181141 |
| chr2 | 231183260 | 231183380 |
| chr2 | 231183725 | 231183845 |
| chr2 | 231188990 | 231189110 |
| chr2 | 231222434 | 231222634 |
| chr2 | 232301610 | 232301730 |
| chr2 | 234601608 | 234601728 |
| chr2 | 235303121 | 235303241 |
| chr2 | 238313136 | 238313256 |
| chr2 | 241328689 | 241328809 |
| chr3 | 66834     | 66954     |
| chr3 | 3067790   | 3067910   |
| chr3 | 3192498   | 3193007   |
| chr3 | 3193327   | 3193447   |
| chr3 | 3193615   | 3193735   |
| chr3 | 3194085   | 3194325   |
| chr3 | 3195059   | 3195219   |
| chr3 | 3195601   | 3195801   |
| chr3 | 3196372   | 3196572   |
| chr3 | 3197001   | 3197121   |
| chr3 | 3197853   | 3198013   |
| chr3 | 3198319   | 3198439   |
| chr3 | 3198452   | 3198572   |
| chr3 | 3199504   | 3199731   |
| chr3 | 3201719   | 3201839   |
| chr3 | 3204743   | 3204863   |
| chr3 | 3205371   | 3205491   |
| chr3 | 3209251   | 3209531   |

|      |          |          |
|------|----------|----------|
| chr3 | 3211494  | 3211614  |
| chr3 | 3214414  | 3214654  |
| chr3 | 3215723  | 3215963  |
| chr3 | 3216799  | 3216999  |
| chr3 | 3220428  | 3220548  |
| chr3 | 3220573  | 3220693  |
| chr3 | 3221257  | 3221417  |
| chr3 | 6081767  | 6081887  |
| chr3 | 8817200  | 8817400  |
| chr3 | 8922971  | 8923211  |
| chr3 | 8932001  | 8932201  |
| chr3 | 8940514  | 8940794  |
| chr3 | 8943993  | 8944273  |
| chr3 | 8953925  | 8954125  |
| chr3 | 8955265  | 8955465  |
| chr3 | 8977526  | 8977766  |
| chr3 | 8981187  | 8981387  |
| chr3 | 8983139  | 8983499  |
| chr3 | 8988838  | 8989038  |
| chr3 | 8990123  | 8990323  |
| chr3 | 9000544  | 9000744  |
| chr3 | 9004963  | 9005123  |
| chr3 | 9098363  | 9098483  |
| chr3 | 10070273 | 10070473 |
| chr3 | 10074445 | 10074725 |
| chr3 | 10076086 | 10076286 |
| chr3 | 10076350 | 10076590 |
| chr3 | 10076786 | 10076986 |
| chr3 | 10077916 | 10078076 |
| chr3 | 10080901 | 10081101 |
| chr3 | 10081342 | 10081622 |
| chr3 | 10082161 | 10082361 |
| chr3 | 10083250 | 10083450 |
| chr3 | 10084174 | 10084414 |
| chr3 | 10084663 | 10084903 |
| chr3 | 10085101 | 10085341 |
| chr3 | 10085450 | 10085610 |
| chr3 | 10088195 | 10088475 |
| chr3 | 10089547 | 10089787 |
| chr3 | 10091003 | 10091243 |
| chr3 | 10093985 | 10094225 |
| chr3 | 10101912 | 10102152 |
| chr3 | 10105415 | 10105655 |

|      |          |          |
|------|----------|----------|
| chr3 | 10105976 | 10106176 |
| chr3 | 10106345 | 10106625 |
| chr3 | 10107007 | 10107247 |
| chr3 | 10107485 | 10107725 |
| chr3 | 10108826 | 10109066 |
| chr3 | 10114489 | 10114729 |
| chr3 | 10114871 | 10115111 |
| chr3 | 10116145 | 10116425 |
| chr3 | 10119702 | 10119942 |
| chr3 | 10122727 | 10122967 |
| chr3 | 10122968 | 10123208 |
| chr3 | 10127430 | 10127670 |
| chr3 | 10128744 | 10128984 |
| chr3 | 10130079 | 10130279 |
| chr3 | 10130452 | 10130692 |
| chr3 | 10131922 | 10132122 |
| chr3 | 10133800 | 10134000 |
| chr3 | 10134907 | 10135067 |
| chr3 | 10135909 | 10136109 |
| chr3 | 10136820 | 10137020 |
| chr3 | 10137942 | 10138222 |
| chr3 | 10140378 | 10140658 |
| chr3 | 10142808 | 10143008 |
| chr3 | 12117160 | 12117280 |
| chr3 | 15152702 | 15152822 |
| chr3 | 18179927 | 18180047 |
| chr3 | 21251259 | 21251379 |
| chr3 | 24263678 | 24263798 |
| chr3 | 27336153 | 27336273 |
| chr3 | 30342106 | 30342226 |
| chr3 | 30648322 | 30648522 |
| chr3 | 30664694 | 30664854 |
| chr3 | 30686182 | 30686462 |
| chr3 | 30691736 | 30691976 |
| chr3 | 30702949 | 30703189 |
| chr3 | 30713109 | 30713949 |
| chr3 | 30715527 | 30715807 |
| chr3 | 30729819 | 30730059 |
| chr3 | 30732861 | 30733141 |
| chr3 | 33419362 | 33419482 |
| chr3 | 36425476 | 36425596 |
| chr3 | 37034971 | 37035251 |
| chr3 | 37038054 | 37038254 |

|      |          |          |
|------|----------|----------|
| chr3 | 37042394 | 37042594 |
| chr3 | 37045828 | 37046028 |
| chr3 | 37048417 | 37048617 |
| chr3 | 37050250 | 37050450 |
| chr3 | 37053251 | 37053411 |
| chr3 | 37053445 | 37053645 |
| chr3 | 37055858 | 37056098 |
| chr3 | 37058943 | 37059143 |
| chr3 | 37061737 | 37062017 |
| chr3 | 37067114 | 37067514 |
| chr3 | 37070208 | 37070488 |
| chr3 | 37081610 | 37081850 |
| chr3 | 37083687 | 37083887 |
| chr3 | 37088951 | 37089231 |
| chr3 | 37089953 | 37090153 |
| chr3 | 37090331 | 37090571 |
| chr3 | 37091920 | 37092200 |
| chr3 | 37107008 | 37107208 |
| chr3 | 38180135 | 38180535 |
| chr3 | 38181301 | 38181541 |
| chr3 | 38181860 | 38182100 |
| chr3 | 38182193 | 38182393 |
| chr3 | 38182579 | 38182819 |
| chr3 | 39448521 | 39448641 |
| chr3 | 42492453 | 42492573 |
| chr3 | 45649357 | 45649477 |
| chr3 | 47058523 | 47058803 |
| chr3 | 47059078 | 47059278 |
| chr3 | 47061189 | 47061389 |
| chr3 | 47064375 | 47064495 |
| chr3 | 47070435 | 47070555 |
| chr3 | 47079111 | 47079311 |
| chr3 | 47084000 | 47084240 |
| chr3 | 47087923 | 47088163 |
| chr3 | 47093577 | 47093697 |
| chr3 | 47098305 | 47098985 |
| chr3 | 47103604 | 47103884 |
| chr3 | 47106011 | 47106211 |
| chr3 | 47108503 | 47108663 |
| chr3 | 47110661 | 47110781 |
| chr3 | 47114843 | 47114963 |
| chr3 | 47121333 | 47121453 |
| chr3 | 47125200 | 47125880 |

|      |          |          |
|------|----------|----------|
| chr3 | 47127644 | 47127844 |
| chr3 | 47129549 | 47129789 |
| chr3 | 47138620 | 47138740 |
| chr3 | 47139387 | 47139627 |
| chr3 | 47142896 | 47143096 |
| chr3 | 47144794 | 47144954 |
| chr3 | 47147428 | 47147668 |
| chr3 | 47155309 | 47155549 |
| chr3 | 47158058 | 47158298 |
| chr3 | 47161156 | 47161356 |
| chr3 | 47161654 | 47166054 |
| chr3 | 47168045 | 47168245 |
| chr3 | 47170546 | 47170666 |
| chr3 | 47177327 | 47177447 |
| chr3 | 47205298 | 47205458 |
| chr3 | 49212970 | 49213090 |
| chr3 | 52236702 | 52236822 |
| chr3 | 52540713 | 52540833 |
| chr3 | 52582024 | 52582304 |
| chr3 | 52584424 | 52584664 |
| chr3 | 52584697 | 52584897 |
| chr3 | 52588677 | 52588957 |
| chr3 | 52592206 | 52592486 |
| chr3 | 52595763 | 52596003 |
| chr3 | 52597283 | 52597523 |
| chr3 | 52598037 | 52598277 |
| chr3 | 52610495 | 52610775 |
| chr3 | 52613002 | 52613282 |
| chr3 | 52620412 | 52620732 |
| chr3 | 52621307 | 52621587 |
| chr3 | 52623058 | 52623298 |
| chr3 | 52637522 | 52637762 |
| chr3 | 52643309 | 52643989 |
| chr3 | 52649299 | 52649539 |
| chr3 | 52651255 | 52651575 |
| chr3 | 52658854 | 52659014 |
| chr3 | 52661237 | 52661437 |
| chr3 | 52662840 | 52663120 |
| chr3 | 52668604 | 52668844 |
| chr3 | 52675915 | 52676115 |
| chr3 | 52677211 | 52677411 |
| chr3 | 52682333 | 52682533 |
| chr3 | 52685691 | 52685891 |

|      |          |          |
|------|----------|----------|
| chr3 | 52692152 | 52692392 |
| chr3 | 52696080 | 52696360 |
| chr3 | 52702403 | 52702683 |
| chr3 | 52712464 | 52712664 |
| chr3 | 52713538 | 52713778 |
| chr3 | 55263411 | 55263531 |
| chr3 | 58269652 | 58269772 |
| chr3 | 59736523 | 59736643 |
| chr3 | 61315290 | 61315410 |
| chr3 | 64327965 | 64328085 |
| chr3 | 67356917 | 67357037 |
| chr3 | 68434542 | 68434662 |
| chr3 | 70374130 | 70374250 |
| chr3 | 71007364 | 71007524 |
| chr3 | 71008329 | 71008609 |
| chr3 | 71014983 | 71015263 |
| chr3 | 71019821 | 71020021 |
| chr3 | 71021106 | 71021386 |
| chr3 | 71021646 | 71021886 |
| chr3 | 71026022 | 71026262 |
| chr3 | 71026733 | 71026933 |
| chr3 | 71026959 | 71027199 |
| chr3 | 71037086 | 71037286 |
| chr3 | 71050066 | 71050266 |
| chr3 | 71064631 | 71064871 |
| chr3 | 71090460 | 71090700 |
| chr3 | 71096026 | 71096306 |
| chr3 | 71101632 | 71101832 |
| chr3 | 71102735 | 71102975 |
| chr3 | 71161617 | 71161857 |
| chr3 | 71179621 | 71179861 |
| chr3 | 71246960 | 71247240 |
| chr3 | 71247302 | 71247582 |
| chr3 | 73411610 | 73411730 |
| chr3 | 75986598 | 75986798 |
| chr3 | 76126106 | 76126226 |
| chr3 | 76224979 | 76225099 |
| chr3 | 76439689 | 76439810 |
| chr3 | 76467134 | 76467254 |
| chr3 | 76469521 | 76469641 |
| chr3 | 76480995 | 76481115 |
| chr3 | 76489969 | 76490089 |
| chr3 | 76735732 | 76735852 |

|      |          |          |
|------|----------|----------|
| chr3 | 76763429 | 76763549 |
| chr3 | 76780430 | 76780550 |
| chr3 | 77089886 | 77090046 |
| chr3 | 77147147 | 77147507 |
| chr3 | 77235849 | 77235969 |
| chr3 | 77246668 | 77246788 |
| chr3 | 77526523 | 77526763 |
| chr3 | 77530189 | 77530429 |
| chr3 | 77531865 | 77531985 |
| chr3 | 77542343 | 77542583 |
| chr3 | 77571869 | 77572109 |
| chr3 | 77595430 | 77595670 |
| chr3 | 77598882 | 77599002 |
| chr3 | 77599914 | 77600194 |
| chr3 | 77607077 | 77607317 |
| chr3 | 77611742 | 77611942 |
| chr3 | 77612258 | 77612538 |
| chr3 | 77613506 | 77613706 |
| chr3 | 77614047 | 77614327 |
| chr3 | 77617404 | 77617644 |
| chr3 | 77623645 | 77623885 |
| chr3 | 77626582 | 77626822 |
| chr3 | 77629043 | 77629323 |
| chr3 | 77637852 | 77638132 |
| chr3 | 77644233 | 77644393 |
| chr3 | 77645717 | 77645957 |
| chr3 | 77651341 | 77651661 |
| chr3 | 77652028 | 77652268 |
| chr3 | 77656906 | 77657146 |
| chr3 | 77666655 | 77666935 |
| chr3 | 77671360 | 77671600 |
| chr3 | 77675577 | 77675697 |
| chr3 | 77681575 | 77681855 |
| chr3 | 77683967 | 77684247 |
| chr3 | 77691817 | 77692097 |
| chr3 | 77693834 | 77694074 |
| chr3 | 77695106 | 77695306 |
| chr3 | 78647969 | 78648169 |
| chr3 | 78649220 | 78649500 |
| chr3 | 78655876 | 78656196 |
| chr3 | 78663753 | 78664015 |
| chr3 | 78666767 | 78667207 |
| chr3 | 78676361 | 78676734 |



|      |          |          |
|------|----------|----------|
| chr3 | 78680262 | 78680502 |
| chr3 | 78683038 | 78683238 |
| chr3 | 78683533 | 78683773 |
| chr3 | 78684910 | 78685270 |
| chr3 | 78688850 | 78689090 |
| chr3 | 78695238 | 78695398 |
| chr3 | 78696691 | 78696891 |
| chr3 | 78700840 | 78701120 |
| chr3 | 78706193 | 78706473 |
| chr3 | 78708776 | 78709016 |
| chr3 | 78710175 | 78710415 |
| chr3 | 78711083 | 78711323 |
| chr3 | 78716975 | 78717507 |
| chr3 | 78717568 | 78717768 |
| chr3 | 78719228 | 78719468 |
| chr3 | 78734841 | 78735121 |
| chr3 | 78737739 | 78737979 |
| chr3 | 78742401 | 78742601 |
| chr3 | 78744145 | 78744265 |
| chr3 | 78763490 | 78763730 |
| chr3 | 78766373 | 78766613 |
| chr3 | 78766852 | 78767092 |
| chr3 | 78775506 | 78775626 |
| chr3 | 78795851 | 78796091 |
| chr3 | 78877156 | 78877276 |
| chr3 | 78985737 | 78985857 |
| chr3 | 78987733 | 78988093 |
| chr3 | 79067503 | 79067663 |
| chr3 | 79174547 | 79174747 |
| chr3 | 79190850 | 79190970 |
| chr3 | 79192683 | 79192803 |
| chr3 | 79192923 | 79193043 |
| chr3 | 79412131 | 79412251 |
| chr3 | 79429749 | 79429869 |
| chr3 | 79522042 | 79522350 |
| chr3 | 79522398 | 79522518 |
| chr3 | 79533034 | 79533155 |
| chr3 | 79569497 | 79569617 |
| chr3 | 79582140 | 79582340 |
| chr3 | 79585097 | 79585217 |
| chr3 | 79634005 | 79634125 |
| chr3 | 79638917 | 79639117 |
| chr3 | 80549196 | 80549316 |

|      |           |           |
|------|-----------|-----------|
| chr3 | 82545930  | 82546050  |
| chr3 | 85570501  | 85570621  |
| chr3 | 88585021  | 88585141  |
| chr3 | 89156842  | 89157042  |
| chr3 | 89176290  | 89176490  |
| chr3 | 89258979  | 89259699  |
| chr3 | 89390003  | 89390283  |
| chr3 | 89390892  | 89391252  |
| chr3 | 89444928  | 89445168  |
| chr3 | 89448441  | 89448681  |
| chr3 | 89456349  | 89456589  |
| chr3 | 89457148  | 89457348  |
| chr3 | 89462233  | 89462473  |
| chr3 | 89468327  | 89468567  |
| chr3 | 89478186  | 89478386  |
| chr3 | 89480284  | 89480524  |
| chr3 | 89498309  | 89498589  |
| chr3 | 89499303  | 89499543  |
| chr3 | 89521551  | 89521831  |
| chr3 | 89528479  | 89528719  |
| chr3 | 93641473  | 93641593  |
| chr3 | 96664184  | 96664304  |
| chr3 | 99679401  | 99679521  |
| chr3 | 102827890 | 102828010 |
| chr3 | 105840951 | 105841071 |
| chr3 | 108867068 | 108867188 |
| chr3 | 111873936 | 111874056 |
| chr3 | 114957075 | 114957195 |
| chr3 | 117800484 | 117800604 |
| chr3 | 117958339 | 117958459 |
| chr3 | 121015764 | 121015884 |
| chr3 | 124017936 | 124018056 |
| chr3 | 127037617 | 127037737 |
| chr3 | 130060660 | 130060780 |
| chr3 | 133088302 | 133088422 |
| chr3 | 136094161 | 136094281 |
| chr3 | 138374179 | 138374419 |
| chr3 | 138374929 | 138375169 |
| chr3 | 138376464 | 138376744 |
| chr3 | 138382689 | 138382929 |
| chr3 | 138383821 | 138384101 |
| chr3 | 138400755 | 138400955 |
| chr3 | 138402454 | 138402694 |

|      |           |           |
|------|-----------|-----------|
| chr3 | 138403415 | 138403695 |
| chr3 | 138407666 | 138407866 |
| chr3 | 138409773 | 138410053 |
| chr3 | 138413568 | 138413808 |
| chr3 | 138417722 | 138417962 |
| chr3 | 138423229 | 138423389 |
| chr3 | 138425945 | 138426185 |
| chr3 | 138430998 | 138431198 |
| chr3 | 138433295 | 138433575 |
| chr3 | 138452141 | 138452341 |
| chr3 | 138453420 | 138453700 |
| chr3 | 138456498 | 138456778 |
| chr3 | 138461393 | 138461633 |
| chr3 | 138474592 | 138474832 |
| chr3 | 138477959 | 138478239 |
| chr3 | 139101717 | 139101837 |
| chr3 | 141205871 | 141206111 |
| chr3 | 141207415 | 141207645 |
| chr3 | 141212457 | 141212577 |
| chr3 | 141213526 | 141213646 |
| chr3 | 141217996 | 141218116 |
| chr3 | 141230963 | 141231163 |
| chr3 | 141235121 | 141235321 |
| chr3 | 141240121 | 141240241 |
| chr3 | 141244717 | 141244837 |
| chr3 | 141248496 | 141248696 |
| chr3 | 141259332 | 141259492 |
| chr3 | 141272144 | 141272264 |
| chr3 | 141272640 | 141272840 |
| chr3 | 141274637 | 141274797 |
| chr3 | 141277577 | 141277845 |
| chr3 | 141278686 | 141278886 |
| chr3 | 141289711 | 141289951 |
| chr3 | 141290201 | 141290441 |
| chr3 | 141291407 | 141291607 |
| chr3 | 141291945 | 141292105 |
| chr3 | 141292727 | 141292967 |
| chr3 | 141294989 | 141295109 |
| chr3 | 141295794 | 141295994 |
| chr3 | 141299151 | 141299351 |
| chr3 | 141299900 | 141300060 |
| chr3 | 141304823 | 141304983 |
| chr3 | 141305442 | 141305642 |

|      |           |           |
|------|-----------|-----------|
| chr3 | 141309243 | 141309363 |
| chr3 | 141324495 | 141324615 |
| chr3 | 141326460 | 141326660 |
| chr3 | 141327314 | 141327554 |
| chr3 | 141328213 | 141328413 |
| chr3 | 141328673 | 141328953 |
| chr3 | 141331039 | 141331239 |
| chr3 | 142164675 | 142164795 |
| chr3 | 142168217 | 142168497 |
| chr3 | 142169309 | 142169509 |
| chr3 | 142171846 | 142172126 |
| chr3 | 142176381 | 142176661 |
| chr3 | 142177736 | 142178289 |
| chr3 | 142180716 | 142180996 |
| chr3 | 142183902 | 142184182 |
| chr3 | 142185150 | 142185390 |
| chr3 | 142186722 | 142186962 |
| chr3 | 142188154 | 142188434 |
| chr3 | 142188876 | 142189076 |
| chr3 | 142203912 | 142204192 |
| chr3 | 142211923 | 142212203 |
| chr3 | 142215160 | 142215440 |
| chr3 | 142215804 | 142216084 |
| chr3 | 142217387 | 142217667 |
| chr3 | 142218414 | 142218614 |
| chr3 | 142222118 | 142222318 |
| chr3 | 142223922 | 142224202 |
| chr3 | 142226721 | 142227001 |
| chr3 | 142231086 | 142231326 |
| chr3 | 142232291 | 142232531 |
| chr3 | 142234176 | 142234416 |
| chr3 | 142238481 | 142238721 |
| chr3 | 142241506 | 142241746 |
| chr3 | 142242817 | 142243057 |
| chr3 | 142253864 | 142254104 |
| chr3 | 142254896 | 142255096 |
| chr3 | 142257255 | 142257535 |
| chr3 | 142259709 | 142259949 |
| chr3 | 142261452 | 142261652 |
| chr3 | 142266539 | 142266779 |
| chr3 | 142268299 | 142268539 |
| chr3 | 142268918 | 142269198 |
| chr3 | 142272008 | 142272288 |

|      |           |           |
|------|-----------|-----------|
| chr3 | 142272411 | 142272881 |
| chr3 | 142274689 | 142275009 |
| chr3 | 142275200 | 142275440 |
| chr3 | 142277413 | 142277693 |
| chr3 | 142278067 | 142278307 |
| chr3 | 142279080 | 142279320 |
| chr3 | 142280033 | 142280313 |
| chr3 | 142281052 | 142281972 |
| chr3 | 142284892 | 142285172 |
| chr3 | 142286850 | 142287050 |
| chr3 | 142297436 | 142297596 |
| chr3 | 145168818 | 145168938 |
| chr3 | 148171188 | 148171308 |
| chr3 | 151187230 | 151187350 |
| chr3 | 154454469 | 154454589 |
| chr3 | 157475041 | 157475161 |
| chr3 | 160519658 | 160519778 |
| chr3 | 160534164 | 160534284 |
| chr3 | 163525663 | 163525783 |
| chr3 | 166585119 | 166585239 |
| chr3 | 168802643 | 168802883 |
| chr3 | 168804244 | 168804444 |
| chr3 | 168806739 | 168807019 |
| chr3 | 168807785 | 168808025 |
| chr3 | 168810697 | 168810937 |
| chr3 | 168812808 | 168813088 |
| chr3 | 168815038 | 168815158 |
| chr3 | 168818631 | 168818791 |
| chr3 | 168819790 | 168820070 |
| chr3 | 168825626 | 168825826 |
| chr3 | 168830518 | 168830718 |
| chr3 | 168833168 | 168834528 |
| chr3 | 168838801 | 168839041 |
| chr3 | 168840321 | 168840561 |
| chr3 | 168845619 | 168845859 |
| chr3 | 168849167 | 168849367 |
| chr3 | 168861432 | 168861672 |
| chr3 | 168862685 | 168862885 |
| chr3 | 168954713 | 168954833 |
| chr3 | 169017410 | 169017530 |
| chr3 | 169033421 | 169033541 |
| chr3 | 169079132 | 169079252 |
| chr3 | 169098963 | 169099323 |

|      |           |           |
|------|-----------|-----------|
| chr3 | 169128213 | 169128333 |
| chr3 | 169146436 | 169146556 |
| chr3 | 169177863 | 169177983 |
| chr3 | 169191979 | 169192099 |
| chr3 | 169197963 | 169198083 |
| chr3 | 169243963 | 169244083 |
| chr3 | 169249684 | 169249804 |
| chr3 | 169283712 | 169283872 |
| chr3 | 169322879 | 169322999 |
| chr3 | 169330583 | 169330703 |
| chr3 | 169347771 | 169347891 |
| chr3 | 169366475 | 169366595 |
| chr3 | 169381041 | 169381241 |
| chr3 | 169595425 | 169595545 |
| chr3 | 170781611 | 170781811 |
| chr3 | 170783925 | 170784165 |
| chr3 | 170784324 | 170784564 |
| chr3 | 170786591 | 170786831 |
| chr3 | 170788961 | 170789161 |
| chr3 | 170797253 | 170797493 |
| chr3 | 170799991 | 170800231 |
| chr3 | 170801888 | 170802168 |
| chr3 | 170802862 | 170803062 |
| chr3 | 170805072 | 170805352 |
| chr3 | 170811572 | 170811812 |
| chr3 | 170819189 | 170819469 |
| chr3 | 170824883 | 170825083 |
| chr3 | 170825759 | 170825999 |
| chr3 | 170828444 | 170828724 |
| chr3 | 170841337 | 170841537 |
| chr3 | 170843700 | 170843940 |
| chr3 | 170846444 | 170846724 |
| chr3 | 170855933 | 170856213 |
| chr3 | 170857201 | 170857401 |
| chr3 | 170858142 | 170858342 |
| chr3 | 170875230 | 170875470 |
| chr3 | 170879011 | 170879171 |
| chr3 | 170884831 | 170885111 |
| chr3 | 170892999 | 170893159 |
| chr3 | 170895061 | 170895221 |
| chr3 | 170906437 | 170906677 |
| chr3 | 170908430 | 170908630 |
| chr3 | 170912268 | 170912468 |

|      |           |           |
|------|-----------|-----------|
| chr3 | 170928847 | 170929087 |
| chr3 | 170943273 | 170943473 |
| chr3 | 170945901 | 170946061 |
| chr3 | 171064899 | 171065099 |
| chr3 | 171087361 | 171087521 |
| chr3 | 171177743 | 171177903 |
| chr3 | 172603622 | 172603742 |
| chr3 | 175632041 | 175632161 |
| chr3 | 178794737 | 178794857 |
| chr3 | 178916610 | 178916970 |
| chr3 | 178917462 | 178917702 |
| chr3 | 178919062 | 178919342 |
| chr3 | 178921314 | 178921594 |
| chr3 | 178922233 | 178922433 |
| chr3 | 178927335 | 178927535 |
| chr3 | 178927929 | 178928405 |
| chr3 | 178935939 | 178936179 |
| chr3 | 178936924 | 178937124 |
| chr3 | 178937300 | 178937580 |
| chr3 | 178937688 | 178937888 |
| chr3 | 178938719 | 178938999 |
| chr3 | 178941821 | 178942021 |
| chr3 | 178942428 | 178942668 |
| chr3 | 178943708 | 178943868 |
| chr3 | 178947004 | 178947284 |
| chr3 | 178947750 | 178947950 |
| chr3 | 178947968 | 178948208 |
| chr3 | 178951876 | 178952156 |
| chr3 | 181801076 | 181801196 |
| chr3 | 183818355 | 183818475 |
| chr3 | 184844647 | 184844767 |
| chr3 | 187440177 | 187440457 |
| chr3 | 187442677 | 187442917 |
| chr3 | 187443265 | 187443505 |
| chr3 | 187444462 | 187444742 |
| chr3 | 187446119 | 187446359 |
| chr3 | 187446823 | 187447823 |
| chr3 | 187449467 | 187449747 |
| chr3 | 187451260 | 187451540 |
| chr3 | 187859511 | 187859631 |
| chr3 | 190877051 | 190877171 |
| chr3 | 193120426 | 193120666 |
| chr3 | 193125041 | 193125241 |

|      |           |           |
|------|-----------|-----------|
| chr3 | 193128714 | 193128914 |
| chr3 | 193129943 | 193130183 |
| chr3 | 193132313 | 193132593 |
| chr3 | 193151569 | 193151769 |
| chr3 | 193153384 | 193153584 |
| chr3 | 193156198 | 193156438 |
| chr3 | 193156752 | 193156912 |
| chr3 | 193158284 | 193158484 |
| chr3 | 193159195 | 193159435 |
| chr3 | 193160123 | 193160403 |
| chr3 | 193165936 | 193166176 |
| chr3 | 193171825 | 193172065 |
| chr3 | 193174725 | 193175005 |
| chr3 | 193175110 | 193175310 |
| chr3 | 193176796 | 193177036 |
| chr3 | 193180472 | 193180672 |
| chr3 | 193182702 | 193182942 |
| chr3 | 193183752 | 193184032 |
| chr3 | 193185049 | 193185329 |
| chr3 | 193188594 | 193188834 |
| chr3 | 193201659 | 193201859 |
| chr3 | 193207465 | 193207705 |
| chr3 | 193209052 | 193209252 |
| chr3 | 193210645 | 193211013 |
| chr3 | 193220214 | 193220494 |
| chr3 | 193232433 | 193232713 |
| chr3 | 193272478 | 193272638 |
| chr3 | 193879455 | 193879575 |
| chr3 | 196898549 | 196898669 |
| chr4 | 60097     | 60217     |
| chr4 | 1791957   | 1792077   |
| chr4 | 1793215   | 1793335   |
| chr4 | 1795607   | 1795823   |
| chr4 | 1796119   | 1796239   |
| chr4 | 1797423   | 1797543   |
| chr4 | 1797675   | 1797915   |
| chr4 | 1798295   | 1798415   |
| chr4 | 1799429   | 1799549   |
| chr4 | 1800971   | 1801259   |
| chr4 | 1801422   | 1801590   |
| chr4 | 1802217   | 1802337   |
| chr4 | 1803034   | 1803883   |
| chr4 | 1803909   | 1804029   |



|      |         |         |
|------|---------|---------|
| chr4 | 1804205 | 1804445 |
| chr4 | 1804583 | 1804847 |
| chr4 | 1805358 | 1805622 |
| chr4 | 1806007 | 1806295 |
| chr4 | 1806489 | 1806753 |
| chr4 | 1807022 | 1807715 |
| chr4 | 1807718 | 1808102 |
| chr4 | 1808221 | 1808461 |
| chr4 | 1808500 | 1808716 |
| chr4 | 1808784 | 1809072 |
| chr4 | 1816629 | 1816749 |
| chr4 | 1902379 | 1902979 |
| chr4 | 1904389 | 1904509 |
| chr4 | 1905778 | 1906211 |
| chr4 | 1907020 | 1907140 |
| chr4 | 1913768 | 1913928 |
| chr4 | 1918540 | 1918820 |
| chr4 | 1918898 | 1919018 |
| chr4 | 1919848 | 1920368 |
| chr4 | 1925304 | 1925424 |
| chr4 | 1925431 | 1925551 |
| chr4 | 1932304 | 1932635 |
| chr4 | 1936829 | 1937029 |
| chr4 | 1940118 | 1940318 |
| chr4 | 1941327 | 1941567 |
| chr4 | 1944016 | 1944176 |
| chr4 | 1946063 | 1946183 |
| chr4 | 1947263 | 1947383 |
| chr4 | 1952744 | 1952984 |
| chr4 | 1953776 | 1954016 |
| chr4 | 1954860 | 1955260 |
| chr4 | 1956837 | 1957117 |
| chr4 | 1957377 | 1957617 |
| chr4 | 1957692 | 1957932 |
| chr4 | 1959611 | 1959811 |
| chr4 | 1961076 | 1961472 |
| chr4 | 1962574 | 1962694 |
| chr4 | 1962719 | 1962919 |
| chr4 | 1963036 | 1963156 |
| chr4 | 1971624 | 1971744 |
| chr4 | 1976540 | 1976780 |
| chr4 | 1976973 | 1977173 |
| chr4 | 1978183 | 1978423 |

|      |          |          |
|------|----------|----------|
| chr4 | 1978848  | 1978968  |
| chr4 | 1979899  | 1980019  |
| chr4 | 1980360  | 1980640  |
| chr4 | 3089199  | 3089319  |
| chr4 | 6090431  | 6090551  |
| chr4 | 9599730  | 9599850  |
| chr4 | 12664029 | 12664149 |
| chr4 | 15712943 | 15713063 |
| chr4 | 18722345 | 18722465 |
| chr4 | 21726801 | 21726921 |
| chr4 | 24779446 | 24779566 |
| chr4 | 27790885 | 27791005 |
| chr4 | 30796047 | 30796167 |
| chr4 | 33879802 | 33879922 |
| chr4 | 36979711 | 36979831 |
| chr4 | 38776430 | 38776550 |
| chr4 | 40187477 | 40187597 |
| chr4 | 43199130 | 43199250 |
| chr4 | 46238677 | 46238797 |
| chr4 | 52728264 | 52728384 |
| chr4 | 53219059 | 53219179 |
| chr4 | 55743591 | 55743711 |
| chr4 | 55946098 | 55946338 |
| chr4 | 55948065 | 55948265 |
| chr4 | 55948652 | 55948852 |
| chr4 | 55953729 | 55953969 |
| chr4 | 55954987 | 55955187 |
| chr4 | 55955490 | 55955690 |
| chr4 | 55955813 | 55956013 |
| chr4 | 55956063 | 55956303 |
| chr4 | 55958732 | 55958932 |
| chr4 | 55960925 | 55961165 |
| chr4 | 55961687 | 55961887 |
| chr4 | 55962352 | 55962552 |
| chr4 | 55963780 | 55963980 |
| chr4 | 55964251 | 55964491 |
| chr4 | 55964816 | 55965016 |
| chr4 | 55968009 | 55968249 |
| chr4 | 55968481 | 55968721 |
| chr4 | 55970800 | 55971160 |
| chr4 | 55971952 | 55972152 |
| chr4 | 55972795 | 55973035 |
| chr4 | 55973861 | 55974101 |

|      |           |           |
|------|-----------|-----------|
| chr4 | 55976511  | 55976977  |
| chr4 | 55979419  | 55979699  |
| chr4 | 55980242  | 55980482  |
| chr4 | 55980984  | 55981264  |
| chr4 | 55981392  | 55981632  |
| chr4 | 55984728  | 55985008  |
| chr4 | 55987210  | 55987410  |
| chr4 | 55991346  | 55991506  |
| chr4 | 58744530  | 58744650  |
| chr4 | 60833697  | 60833817  |
| chr4 | 61771371  | 61771491  |
| chr4 | 64948693  | 64948813  |
| chr4 | 67961236  | 67961356  |
| chr4 | 70974255  | 70974375  |
| chr4 | 74208139  | 74208259  |
| chr4 | 77228664  | 77228784  |
| chr4 | 78269972  | 78270092  |
| chr4 | 80352572  | 80352692  |
| chr4 | 83378812  | 83378932  |
| chr4 | 86384269  | 86384389  |
| chr4 | 89389580  | 89389700  |
| chr4 | 92454871  | 92454991  |
| chr4 | 95472570  | 95472690  |
| chr4 | 98567906  | 98568026  |
| chr4 | 101579912 | 101580032 |
| chr4 | 103431997 | 103432197 |
| chr4 | 103443508 | 103443628 |
| chr4 | 103446054 | 103446174 |
| chr4 | 103446611 | 103446771 |
| chr4 | 103450106 | 103450226 |
| chr4 | 103450316 | 103450436 |
| chr4 | 103450951 | 103451111 |
| chr4 | 103454941 | 103455101 |
| chr4 | 103457357 | 103457477 |
| chr4 | 103458816 | 103458936 |
| chr4 | 103458963 | 103459163 |
| chr4 | 103465551 | 103465671 |
| chr4 | 103481290 | 103481410 |
| chr4 | 103481500 | 103481620 |
| chr4 | 103486155 | 103486275 |
| chr4 | 103488097 | 103488337 |
| chr4 | 103497974 | 103498254 |
| chr4 | 103499962 | 103500242 |

|      |           |           |
|------|-----------|-----------|
| chr4 | 103501643 | 103501843 |
| chr4 | 103503763 | 103503883 |
| chr4 | 103503968 | 103504168 |
| chr4 | 103505787 | 103506027 |
| chr4 | 103506383 | 103506503 |
| chr4 | 103510450 | 103510570 |
| chr4 | 103511053 | 103511173 |
| chr4 | 103514533 | 103514773 |
| chr4 | 103515993 | 103516193 |
| chr4 | 103517251 | 103517531 |
| chr4 | 103518244 | 103518364 |
| chr4 | 103518627 | 103518867 |
| chr4 | 103522008 | 103522208 |
| chr4 | 103527633 | 103527873 |
| chr4 | 103528251 | 103528531 |
| chr4 | 103528756 | 103528956 |
| chr4 | 103531673 | 103531913 |
| chr4 | 103533153 | 103533313 |
| chr4 | 103533536 | 103533816 |
| chr4 | 103534539 | 103534779 |
| chr4 | 103537530 | 103537810 |
| chr4 | 104640875 | 104640995 |
| chr4 | 106111534 | 106111734 |
| chr4 | 106155025 | 106158625 |
| chr4 | 106162442 | 106162642 |
| chr4 | 106163937 | 106164137 |
| chr4 | 106164710 | 106164950 |
| chr4 | 106180710 | 106180990 |
| chr4 | 106182860 | 106183060 |
| chr4 | 106190715 | 106190955 |
| chr4 | 106193697 | 106194097 |
| chr4 | 106196051 | 106196251 |
| chr4 | 106196299 | 106197699 |
| chr4 | 107685716 | 107685836 |
| chr4 | 110708457 | 110708577 |
| chr4 | 113715727 | 113715847 |
| chr4 | 116804585 | 116804705 |
| chr4 | 119817562 | 119817682 |
| chr4 | 122824531 | 122824651 |
| chr4 | 125840490 | 125840610 |
| chr4 | 126237553 | 126242753 |
| chr4 | 126272991 | 126273111 |
| chr4 | 126279945 | 126280065 |

|      |           |           |
|------|-----------|-----------|
| chr4 | 126281069 | 126281189 |
| chr4 | 126281862 | 126281982 |
| chr4 | 126286253 | 126286373 |
| chr4 | 126286382 | 126286502 |
| chr4 | 126315044 | 126315204 |
| chr4 | 126319884 | 126320124 |
| chr4 | 126328025 | 126328305 |
| chr4 | 126329593 | 126329953 |
| chr4 | 126333336 | 126333456 |
| chr4 | 126336019 | 126336979 |
| chr4 | 126337549 | 126337829 |
| chr4 | 126352421 | 126352541 |
| chr4 | 126355349 | 126355629 |
| chr4 | 126367435 | 126367715 |
| chr4 | 126369610 | 126373970 |
| chr4 | 126378958 | 126379078 |
| chr4 | 126380306 | 126380426 |
| chr4 | 126384669 | 126384869 |
| chr4 | 126387048 | 126387168 |
| chr4 | 126389660 | 126389980 |
| chr4 | 126397268 | 126397468 |
| chr4 | 126398308 | 126398548 |
| chr4 | 126400837 | 126401077 |
| chr4 | 126402664 | 126402904 |
| chr4 | 126408490 | 126408770 |
| chr4 | 126411049 | 126412929 |
| chr4 | 129024213 | 129024333 |
| chr4 | 132052337 | 132052457 |
| chr4 | 135137900 | 135138020 |
| chr4 | 138161304 | 138161424 |
| chr4 | 138313505 | 138313625 |
| chr4 | 141194264 | 141194384 |
| chr4 | 144220518 | 144220638 |
| chr4 | 147260416 | 147260536 |
| chr4 | 150280915 | 150281035 |
| chr4 | 153244006 | 153244326 |
| chr4 | 153245320 | 153245560 |
| chr4 | 153247130 | 153247410 |
| chr4 | 153249330 | 153249570 |
| chr4 | 153250760 | 153251000 |
| chr4 | 153251831 | 153252071 |
| chr4 | 153253679 | 153253919 |
| chr4 | 153258900 | 153259140 |

|      |           |           |
|------|-----------|-----------|
| chr4 | 153268006 | 153268246 |
| chr4 | 153269773 | 153269933 |
| chr4 | 153271134 | 153271334 |
| chr4 | 153273591 | 153273911 |
| chr4 | 153303273 | 153303553 |
| chr4 | 153332320 | 153332976 |
| chr4 | 156352006 | 156352126 |
| chr4 | 159430641 | 159430761 |
| chr4 | 162460503 | 162460623 |
| chr4 | 165498142 | 165498262 |
| chr4 | 168545306 | 168545426 |
| chr4 | 171592624 | 171592744 |
| chr4 | 174604044 | 174604164 |
| chr4 | 175896647 | 175899167 |
| chr4 | 177605636 | 177605756 |
| chr4 | 180653657 | 180653777 |
| chr4 | 183655690 | 183655810 |
| chr4 | 186658034 | 186658154 |
| chr4 | 187509739 | 187510379 |
| chr4 | 187511439 | 187511639 |
| chr4 | 187511654 | 187511894 |
| chr4 | 187513524 | 187513644 |
| chr4 | 187513796 | 187513956 |
| chr4 | 187516791 | 187517031 |
| chr4 | 187517689 | 187518329 |
| chr4 | 187518790 | 187518990 |
| chr4 | 187519082 | 187519322 |
| chr4 | 187520976 | 187521522 |
| chr4 | 187522381 | 187522621 |
| chr4 | 187524002 | 187524242 |
| chr4 | 187524310 | 187525150 |
| chr4 | 187525489 | 187525769 |
| chr4 | 187527175 | 187527415 |
| chr4 | 187527757 | 187527877 |
| chr4 | 187530285 | 187530525 |
| chr4 | 187530941 | 187531181 |
| chr4 | 187532534 | 187532934 |
| chr4 | 187534259 | 187534499 |
| chr4 | 187535301 | 187535541 |
| chr4 | 187538116 | 187538396 |
| chr4 | 187538855 | 187542935 |
| chr4 | 187549292 | 187549532 |
| chr4 | 187549639 | 187549919 |

|      |           |           |
|------|-----------|-----------|
| chr4 | 187554787 | 187555027 |
| chr4 | 187557163 | 187557403 |
| chr4 | 187557723 | 187558083 |
| chr4 | 187560826 | 187560986 |
| chr4 | 187574337 | 187574457 |
| chr4 | 187580645 | 187580765 |
| chr4 | 187584449 | 187584769 |
| chr4 | 187593898 | 187594018 |
| chr4 | 187627099 | 187627219 |
| chr4 | 187627708 | 187630988 |
| chr4 | 189687337 | 189687457 |
| chr5 | 38079     | 38199     |
| chr5 | 1295091   | 1295371   |
| chr5 | 3042730   | 3042850   |
| chr5 | 6043584   | 6043704   |
| chr5 | 8828322   | 8828442   |
| chr5 | 9044351   | 9044471   |
| chr5 | 12060610  | 12060730  |
| chr5 | 13692048  | 13692288  |
| chr5 | 13700744  | 13700984  |
| chr5 | 13701348  | 13701588  |
| chr5 | 13708217  | 13708457  |
| chr5 | 13714501  | 13714741  |
| chr5 | 13716577  | 13716817  |
| chr5 | 13717406  | 13717646  |
| chr5 | 13718980  | 13719220  |
| chr5 | 13721091  | 13721371  |
| chr5 | 13727570  | 13727810  |
| chr5 | 13729488  | 13729728  |
| chr5 | 13735194  | 13735474  |
| chr5 | 13735883  | 13736083  |
| chr5 | 13737342  | 13737622  |
| chr5 | 13751137  | 13751417  |
| chr5 | 13752200  | 13752440  |
| chr5 | 13753339  | 13753659  |
| chr5 | 13754259  | 13754499  |
| chr5 | 13758903  | 13759143  |
| chr5 | 13762780  | 13763060  |
| chr5 | 13766066  | 13766306  |
| chr5 | 13769016  | 13769296  |
| chr5 | 13769566  | 13769766  |
| chr5 | 13770853  | 13771093  |
| chr5 | 13776541  | 13776821  |

|      |          |          |
|------|----------|----------|
| chr5 | 13777267 | 13777507 |
| chr5 | 13780882 | 13781122 |
| chr5 | 13786233 | 13786513 |
| chr5 | 13788783 | 13789063 |
| chr5 | 13792094 | 13792334 |
| chr5 | 13793610 | 13793850 |
| chr5 | 13793985 | 13794225 |
| chr5 | 13807646 | 13807886 |
| chr5 | 13809103 | 13809343 |
| chr5 | 13810148 | 13810388 |
| chr5 | 13811703 | 13811983 |
| chr5 | 13814694 | 13814974 |
| chr5 | 13817609 | 13817849 |
| chr5 | 13820411 | 13820651 |
| chr5 | 13823325 | 13823525 |
| chr5 | 13824254 | 13824494 |
| chr5 | 13829575 | 13829855 |
| chr5 | 13830088 | 13830368 |
| chr5 | 13830654 | 13830934 |
| chr5 | 13839410 | 13839690 |
| chr5 | 13841006 | 13841246 |
| chr5 | 13841786 | 13842026 |
| chr5 | 13844903 | 13845143 |
| chr5 | 13850702 | 13850982 |
| chr5 | 13859517 | 13859757 |
| chr5 | 13862616 | 13862896 |
| chr5 | 13864485 | 13864765 |
| chr5 | 13865775 | 13866015 |
| chr5 | 13866279 | 13866439 |
| chr5 | 13867871 | 13868111 |
| chr5 | 13870873 | 13871113 |
| chr5 | 13871653 | 13871893 |
| chr5 | 13876739 | 13876979 |
| chr5 | 13882780 | 13883247 |
| chr5 | 13885097 | 13885337 |
| chr5 | 13886015 | 13886295 |
| chr5 | 13891037 | 13891277 |
| chr5 | 13894704 | 13894984 |
| chr5 | 13900297 | 13900537 |
| chr5 | 13901341 | 13901701 |
| chr5 | 13902104 | 13902304 |
| chr5 | 13911448 | 13911648 |
| chr5 | 13913839 | 13914079 |



|      |          |          |
|------|----------|----------|
| chr5 | 13914569 | 13914809 |
| chr5 | 13916410 | 13916610 |
| chr5 | 13917208 | 13917408 |
| chr5 | 13919232 | 13919512 |
| chr5 | 13920537 | 13920777 |
| chr5 | 13922206 | 13922446 |
| chr5 | 13923328 | 13923608 |
| chr5 | 13928144 | 13928344 |
| chr5 | 13931165 | 13931405 |
| chr5 | 13944438 | 13944598 |
| chr5 | 15093345 | 15093465 |
| chr5 | 16784812 | 16784932 |
| chr5 | 18099706 | 18099826 |
| chr5 | 21143180 | 21143300 |
| chr5 | 23509096 | 23509256 |
| chr5 | 23509520 | 23509760 |
| chr5 | 23509982 | 23510182 |
| chr5 | 23517934 | 23518094 |
| chr5 | 23521089 | 23521329 |
| chr5 | 23522363 | 23522563 |
| chr5 | 23522718 | 23522998 |
| chr5 | 23523353 | 23523513 |
| chr5 | 23524399 | 23524679 |
| chr5 | 23526331 | 23527891 |
| chr5 | 24163049 | 24163169 |
| chr5 | 27198973 | 27199093 |
| chr5 | 30209664 | 30209784 |
| chr5 | 33212399 | 33212519 |
| chr5 | 36221688 | 36221808 |
| chr5 | 39224910 | 39225030 |
| chr5 | 42398405 | 42398525 |
| chr5 | 45400330 | 45400450 |
| chr5 | 49820858 | 49820978 |
| chr5 | 52828323 | 52828443 |
| chr5 | 55828518 | 55828638 |
| chr5 | 56111381 | 56111901 |
| chr5 | 56152361 | 56152641 |
| chr5 | 56155521 | 56155761 |
| chr5 | 56160540 | 56160780 |
| chr5 | 56161104 | 56161344 |
| chr5 | 56161589 | 56161869 |
| chr5 | 56167677 | 56167917 |
| chr5 | 56168408 | 56168608 |

|      |          |          |
|------|----------|----------|
| chr5 | 56168621 | 56168861 |
| chr5 | 56170837 | 56171157 |
| chr5 | 56174747 | 56174987 |
| chr5 | 56176483 | 56176683 |
| chr5 | 56176884 | 56177124 |
| chr5 | 56177377 | 56177857 |
| chr5 | 56177868 | 56178708 |
| chr5 | 56179289 | 56179569 |
| chr5 | 56180431 | 56180711 |
| chr5 | 56181700 | 56181940 |
| chr5 | 56183135 | 56183415 |
| chr5 | 56183998 | 56184238 |
| chr5 | 56189292 | 56189572 |
| chr5 | 58831812 | 58831932 |
| chr5 | 61866499 | 61866619 |
| chr5 | 64870627 | 64870747 |
| chr5 | 65892464 | 65892864 |
| chr5 | 66055493 | 66055733 |
| chr5 | 66084439 | 66084679 |
| chr5 | 66124590 | 66124790 |
| chr5 | 66166562 | 66166722 |
| chr5 | 66195694 | 66195894 |
| chr5 | 66198435 | 66198595 |
| chr5 | 66212728 | 66212928 |
| chr5 | 66226477 | 66226677 |
| chr5 | 66255018 | 66255178 |
| chr5 | 66259474 | 66259674 |
| chr5 | 66259770 | 66259970 |
| chr5 | 66282212 | 66282372 |
| chr5 | 66300767 | 66300967 |
| chr5 | 66350175 | 66350375 |
| chr5 | 66385944 | 66386104 |
| chr5 | 66389888 | 66390088 |
| chr5 | 66391359 | 66391559 |
| chr5 | 66396221 | 66396461 |
| chr5 | 66398240 | 66398481 |
| chr5 | 66400178 | 66400418 |
| chr5 | 66405876 | 66406076 |
| chr5 | 66409855 | 66410135 |
| chr5 | 66414463 | 66414623 |
| chr5 | 66416787 | 66416987 |
| chr5 | 66426021 | 66426261 |
| chr5 | 66427589 | 66427829 |

|      |           |           |
|------|-----------|-----------|
| chr5 | 66429287  | 66429527  |
| chr5 | 66430293  | 66430573  |
| chr5 | 66432341  | 66432541  |
| chr5 | 66437883  | 66438123  |
| chr5 | 66438204  | 66438404  |
| chr5 | 66440440  | 66440680  |
| chr5 | 66440969  | 66441209  |
| chr5 | 66445196  | 66445436  |
| chr5 | 66448459  | 66448699  |
| chr5 | 66449226  | 66449466  |
| chr5 | 66456231  | 66456471  |
| chr5 | 66458385  | 66458665  |
| chr5 | 66458966  | 66462886  |
| chr5 | 67880625  | 67880745  |
| chr5 | 70948594  | 70948714  |
| chr5 | 73950700  | 73950820  |
| chr5 | 76967087  | 76967207  |
| chr5 | 79970363  | 79970483  |
| chr5 | 82977783  | 82977903  |
| chr5 | 85993907  | 85994027  |
| chr5 | 88999146  | 88999266  |
| chr5 | 90151528  | 90151648  |
| chr5 | 92019946  | 92020066  |
| chr5 | 95036943  | 95037063  |
| chr5 | 98058879  | 98058999  |
| chr5 | 101075541 | 101075661 |
| chr5 | 104123300 | 104123420 |
| chr5 | 107139603 | 107139723 |
| chr5 | 110143108 | 110143228 |
| chr5 | 112024015 | 112024135 |
| chr5 | 112032615 | 112032735 |
| chr5 | 112043356 | 112043636 |
| chr5 | 112047659 | 112047779 |
| chr5 | 112072733 | 112072853 |
| chr5 | 112090534 | 112090774 |
| chr5 | 112100495 | 112100615 |
| chr5 | 112101964 | 112102164 |
| chr5 | 112102866 | 112103106 |
| chr5 | 112111305 | 112111505 |
| chr5 | 112116425 | 112116665 |
| chr5 | 112125359 | 112125479 |
| chr5 | 112128091 | 112128291 |
| chr5 | 112136900 | 112137100 |

|      |           |           |
|------|-----------|-----------|
| chr5 | 112151140 | 112151340 |
| chr5 | 112154651 | 112155051 |
| chr5 | 112157540 | 112157740 |
| chr5 | 112158371 | 112158491 |
| chr5 | 112162754 | 112162994 |
| chr5 | 112163544 | 112163744 |
| chr5 | 112164490 | 112164730 |
| chr5 | 112170634 | 112170874 |
| chr5 | 112172159 | 112172279 |
| chr5 | 112173236 | 112179836 |
| chr5 | 112192277 | 112192437 |
| chr5 | 112198138 | 112198298 |
| chr5 | 112212265 | 112212385 |
| chr5 | 112223290 | 112223410 |
| chr5 | 112230271 | 112230391 |
| chr5 | 112364884 | 112365004 |
| chr5 | 113143418 | 113143538 |
| chr5 | 116153217 | 116153337 |
| chr5 | 119165628 | 119165748 |
| chr5 | 122169485 | 122169605 |
| chr5 | 125173064 | 125173184 |
| chr5 | 128173279 | 128173399 |
| chr5 | 129194203 | 129194323 |
| chr5 | 131288408 | 131288528 |
| chr5 | 134331861 | 134331981 |
| chr5 | 137493468 | 137493588 |
| chr5 | 137791407 | 137791527 |
| chr5 | 137792697 | 137792817 |
| chr5 | 137795016 | 137795136 |
| chr5 | 137797305 | 137797534 |
| chr5 | 137799169 | 137799289 |
| chr5 | 137799963 | 137800083 |
| chr5 | 137801443 | 137801763 |
| chr5 | 137802343 | 137803787 |
| chr5 | 137805497 | 137805737 |
| chr5 | 137807900 | 137808020 |
| chr5 | 137808362 | 137808482 |
| chr5 | 137810872 | 137810992 |
| chr5 | 140527693 | 140527813 |
| chr5 | 143540658 | 143540778 |
| chr5 | 146554371 | 146554491 |
| chr5 | 149495297 | 149495537 |
| chr5 | 149497156 | 149497436 |

|      |           |           |
|------|-----------|-----------|
| chr5 | 149498242 | 149498482 |
| chr5 | 149498979 | 149499179 |
| chr5 | 149499510 | 149499750 |
| chr5 | 149500391 | 149500631 |
| chr5 | 149500705 | 149500945 |
| chr5 | 149501382 | 149501662 |
| chr5 | 149502544 | 149502824 |
| chr5 | 149503747 | 149503987 |
| chr5 | 149504221 | 149504461 |
| chr5 | 149504953 | 149505193 |
| chr5 | 149506029 | 149506229 |
| chr5 | 149509305 | 149509545 |
| chr5 | 149510043 | 149510283 |
| chr5 | 149511510 | 149511750 |
| chr5 | 149512288 | 149512528 |
| chr5 | 149513095 | 149513375 |
| chr5 | 149513387 | 149513627 |
| chr5 | 149514248 | 149514608 |
| chr5 | 149515099 | 149515459 |
| chr5 | 149516510 | 149516670 |
| chr5 | 149568033 | 149568153 |
| chr5 | 150885111 | 150885671 |
| chr5 | 150886703 | 150887183 |
| chr5 | 150887864 | 150887984 |
| chr5 | 150889538 | 150889778 |
| chr5 | 150891706 | 150892186 |
| chr5 | 150897133 | 150897373 |
| chr5 | 150900821 | 150901661 |
| chr5 | 150903331 | 150903451 |
| chr5 | 150905287 | 150905567 |
| chr5 | 150906746 | 150906986 |
| chr5 | 150907505 | 150907745 |
| chr5 | 150908725 | 150908965 |
| chr5 | 150911140 | 150911540 |
| chr5 | 150913533 | 150913653 |
| chr5 | 150913966 | 150914206 |
| chr5 | 150917310 | 150917550 |
| chr5 | 150918008 | 150918128 |
| chr5 | 150920085 | 150920365 |
| chr5 | 150921831 | 150925911 |
| chr5 | 150928840 | 150929080 |
| chr5 | 150930131 | 150930451 |
| chr5 | 150930977 | 150931217 |

|      |           |           |
|------|-----------|-----------|
| chr5 | 150932722 | 150932962 |
| chr5 | 150933918 | 150934238 |
| chr5 | 150935853 | 150936013 |
| chr5 | 150942038 | 150942199 |
| chr5 | 150942278 | 150942398 |
| chr5 | 150942882 | 150943202 |
| chr5 | 150945222 | 150948502 |
| chr5 | 152588619 | 152588739 |
| chr5 | 155603298 | 155603418 |
| chr5 | 158679519 | 158679639 |
| chr5 | 161684338 | 161684458 |
| chr5 | 164710370 | 164710490 |
| chr5 | 167715179 | 167715299 |
| chr5 | 170726738 | 170726858 |
| chr5 | 173743057 | 173743177 |
| chr5 | 176747965 | 176748085 |
| chr5 | 179663317 | 179663597 |
| chr5 | 179665267 | 179665467 |
| chr5 | 179666855 | 179667055 |
| chr5 | 179667972 | 179668212 |
| chr5 | 179669543 | 179669783 |
| chr5 | 179674333 | 179674573 |
| chr5 | 179674591 | 179674751 |
| chr5 | 179674790 | 179674990 |
| chr5 | 179675915 | 179676195 |
| chr5 | 179688651 | 179688891 |
| chr5 | 179691729 | 179691889 |
| chr5 | 179696224 | 179696464 |
| chr5 | 179706775 | 179707055 |
| chr5 | 179707380 | 179707620 |
| chr5 | 179757410 | 179757530 |
| chr6 | 215363    | 215483    |
| chr6 | 393140    | 393380    |
| chr6 | 394773    | 395053    |
| chr6 | 395573    | 395693    |
| chr6 | 395790    | 395990    |
| chr6 | 397059    | 397349    |
| chr6 | 397360    | 397600    |
| chr6 | 397876    | 397996    |
| chr6 | 398181    | 398301    |
| chr6 | 398714    | 398981    |
| chr6 | 399018    | 399138    |
| chr6 | 401420    | 401780    |

|      |          |          |
|------|----------|----------|
| chr6 | 402026   | 402146   |
| chr6 | 403543   | 403663   |
| chr6 | 403738   | 403858   |
| chr6 | 404571   | 404691   |
| chr6 | 404973   | 405173   |
| chr6 | 405333   | 405573   |
| chr6 | 405839   | 405959   |
| chr6 | 406675   | 406875   |
| chr6 | 407406   | 407646   |
| chr6 | 3258293  | 3258413  |
| chr6 | 6260689  | 6260809  |
| chr6 | 9283252  | 9283372  |
| chr6 | 12286778 | 12286898 |
| chr6 | 15246712 | 15246872 |
| chr6 | 15305082 | 15305202 |
| chr6 | 15374295 | 15374535 |
| chr6 | 15401134 | 15401294 |
| chr6 | 15410405 | 15410645 |
| chr6 | 15452181 | 15452461 |
| chr6 | 15468720 | 15469000 |
| chr6 | 15487535 | 15487775 |
| chr6 | 15496361 | 15497401 |
| chr6 | 15501128 | 15501648 |
| chr6 | 15504676 | 15504876 |
| chr6 | 15507325 | 15507525 |
| chr6 | 15507531 | 15507691 |
| chr6 | 15508527 | 15508727 |
| chr6 | 15509149 | 15509389 |
| chr6 | 15511479 | 15511679 |
| chr6 | 15512389 | 15512669 |
| chr6 | 15513090 | 15513330 |
| chr6 | 15513421 | 15513701 |
| chr6 | 15517345 | 15517545 |
| chr6 | 15520250 | 15520530 |
| chr6 | 18330721 | 18330841 |
| chr6 | 21332400 | 21332520 |
| chr6 | 24342311 | 24342431 |
| chr6 | 26055995 | 26056675 |
| chr6 | 26156608 | 26157288 |
| chr6 | 27367918 | 27368038 |
| chr6 | 30368575 | 30368695 |
| chr6 | 31539707 | 31539827 |
| chr6 | 31539985 | 31540225 |

|      |          |          |
|------|----------|----------|
| chr6 | 31540487 | 31540620 |
| chr6 | 31540723 | 31540843 |
| chr6 | 31542247 | 31542367 |
| chr6 | 31546665 | 31546785 |
| chr6 | 31547362 | 31547482 |
| chr6 | 31548472 | 31548952 |
| chr6 | 31549291 | 31549451 |
| chr6 | 31549533 | 31549693 |
| chr6 | 31549973 | 31550253 |
| chr6 | 31555069 | 31555189 |
| chr6 | 31555331 | 31555451 |
| chr6 | 31555596 | 31555716 |
| chr6 | 31556513 | 31556633 |
| chr6 | 32163210 | 32163930 |
| chr6 | 32164049 | 32164249 |
| chr6 | 32164655 | 32164895 |
| chr6 | 32165063 | 32165383 |
| chr6 | 32166146 | 32166566 |
| chr6 | 32166692 | 32166932 |
| chr6 | 32168555 | 32168835 |
| chr6 | 32168885 | 32169285 |
| chr6 | 32169834 | 32170394 |
| chr6 | 32171502 | 32171702 |
| chr6 | 32171899 | 32172179 |
| chr6 | 32178480 | 32178760 |
| chr6 | 32180207 | 32180447 |
| chr6 | 32180544 | 32180744 |
| chr6 | 32180870 | 32181070 |
| chr6 | 32181420 | 32181660 |
| chr6 | 32181839 | 32182079 |
| chr6 | 32182962 | 32183202 |
| chr6 | 32184662 | 32185086 |
| chr6 | 32185728 | 32185928 |
| chr6 | 32187325 | 32187605 |
| chr6 | 32187863 | 32188103 |
| chr6 | 32188179 | 32188419 |
| chr6 | 32188473 | 32188713 |
| chr6 | 32188748 | 32189108 |
| chr6 | 32190275 | 32190595 |
| chr6 | 32190722 | 32190922 |
| chr6 | 32191588 | 32191748 |
| chr6 | 33398560 | 33398680 |
| chr6 | 36437352 | 36437472 |



|      |          |          |
|------|----------|----------|
| chr6 | 39464652 | 39464772 |
| chr6 | 41898035 | 41898155 |
| chr6 | 41898503 | 41898623 |
| chr6 | 41903576 | 41903856 |
| chr6 | 41904237 | 41904542 |
| chr6 | 41904932 | 41905343 |
| chr6 | 41906600 | 41906720 |
| chr6 | 41907794 | 41907914 |
| chr6 | 41908095 | 41908335 |
| chr6 | 41908633 | 41908793 |
| chr6 | 41909148 | 41909428 |
| chr6 | 41913717 | 41913837 |
| chr6 | 41914435 | 41914555 |
| chr6 | 41915082 | 41915202 |
| chr6 | 41915221 | 41915341 |
| chr6 | 41915359 | 41915578 |
| chr6 | 41915963 | 41916083 |
| chr6 | 41918026 | 41918266 |
| chr6 | 42478064 | 42478184 |
| chr6 | 45296008 | 45296248 |
| chr6 | 45296339 | 45296579 |
| chr6 | 45390303 | 45390703 |
| chr6 | 45399557 | 45399797 |
| chr6 | 45405635 | 45405835 |
| chr6 | 45459624 | 45459904 |
| chr6 | 45479888 | 45480203 |
| chr6 | 45481099 | 45481299 |
| chr6 | 45512906 | 45513066 |
| chr6 | 45514562 | 45515042 |
| chr6 | 45630835 | 45631475 |
| chr6 | 47708370 | 47708490 |
| chr6 | 48488021 | 48488141 |
| chr6 | 51483878 | 51484318 |
| chr6 | 51490968 | 51491088 |
| chr6 | 51491754 | 51491954 |
| chr6 | 51497321 | 51497561 |
| chr6 | 51503600 | 51503800 |
| chr6 | 51512772 | 51512972 |
| chr6 | 51513830 | 51514070 |
| chr6 | 51523738 | 51524778 |
| chr6 | 51586700 | 51586900 |
| chr6 | 51609141 | 51609381 |
| chr6 | 51611462 | 51611742 |

|      |          |          |
|------|----------|----------|
| chr6 | 51612583 | 51613463 |
| chr6 | 51617954 | 51618194 |
| chr6 | 51619538 | 51619778 |
| chr6 | 51637443 | 51637643 |
| chr6 | 51640562 | 51640762 |
| chr6 | 51655982 | 51656222 |
| chr6 | 51695602 | 51695842 |
| chr6 | 51701154 | 51701314 |
| chr6 | 51712530 | 51712810 |
| chr6 | 51720639 | 51720919 |
| chr6 | 51732643 | 51732923 |
| chr6 | 51735249 | 51735489 |
| chr6 | 51747837 | 51748077 |
| chr6 | 51750617 | 51750817 |
| chr6 | 51751886 | 51752086 |
| chr6 | 51768339 | 51768579 |
| chr6 | 51768731 | 51768891 |
| chr6 | 51770955 | 51771195 |
| chr6 | 51774036 | 51774316 |
| chr6 | 51776555 | 51776795 |
| chr6 | 51777148 | 51777388 |
| chr6 | 51798893 | 51799133 |
| chr6 | 51824625 | 51824865 |
| chr6 | 51875061 | 51875301 |
| chr6 | 51882197 | 51882437 |
| chr6 | 51887550 | 51887790 |
| chr6 | 51889355 | 51890995 |
| chr6 | 51892580 | 51892740 |
| chr6 | 51892911 | 51893191 |
| chr6 | 51897775 | 51898015 |
| chr6 | 51900333 | 51900573 |
| chr6 | 51907654 | 51907934 |
| chr6 | 51908375 | 51908575 |
| chr6 | 51909704 | 51909944 |
| chr6 | 51910753 | 51911033 |
| chr6 | 51913233 | 51913473 |
| chr6 | 51914903 | 51915143 |
| chr6 | 51917821 | 51918101 |
| chr6 | 51918779 | 51919019 |
| chr6 | 51920335 | 51920575 |
| chr6 | 51921440 | 51921832 |
| chr6 | 51923119 | 51923399 |
| chr6 | 51924682 | 51924882 |

|      |           |           |
|------|-----------|-----------|
| chr6 | 51927267  | 51927507  |
| chr6 | 51929700  | 51929900  |
| chr6 | 51930724  | 51930924  |
| chr6 | 51934209  | 51934369  |
| chr6 | 51935123  | 51935323  |
| chr6 | 51935755  | 51935915  |
| chr6 | 51936869  | 51937029  |
| chr6 | 51938219  | 51938379  |
| chr6 | 51941022  | 51941182  |
| chr6 | 51944651  | 51944851  |
| chr6 | 51947144  | 51947384  |
| chr6 | 51947934  | 51948094  |
| chr6 | 51949625  | 51949785  |
| chr6 | 54509240  | 54509360  |
| chr6 | 57516973  | 57517093  |
| chr6 | 61967444  | 61967564  |
| chr6 | 65000878  | 65000998  |
| chr6 | 68033817  | 68033937  |
| chr6 | 71036990  | 71037110  |
| chr6 | 74041364  | 74041484  |
| chr6 | 74608842  | 74608962  |
| chr6 | 77059801  | 77059921  |
| chr6 | 80085827  | 80085947  |
| chr6 | 83170837  | 83170957  |
| chr6 | 86268979  | 86269099  |
| chr6 | 89271718  | 89271838  |
| chr6 | 89790603  | 89791163  |
| chr6 | 89793453  | 89793933  |
| chr6 | 92320940  | 92321060  |
| chr6 | 95403590  | 95403710  |
| chr6 | 98517212  | 98517332  |
| chr6 | 101540815 | 101540935 |
| chr6 | 104554621 | 104554741 |
| chr6 | 106534369 | 106534529 |
| chr6 | 106536059 | 106536339 |
| chr6 | 106537293 | 106537413 |
| chr6 | 106537649 | 106537889 |
| chr6 | 106538219 | 106538339 |
| chr6 | 106538634 | 106538754 |
| chr6 | 106541969 | 106542089 |
| chr6 | 106543449 | 106543649 |
| chr6 | 106543884 | 106544004 |
| chr6 | 106544499 | 106544619 |

|      |           |           |
|------|-----------|-----------|
| chr6 | 106545057 | 106545177 |
| chr6 | 106545973 | 106546093 |
| chr6 | 106546492 | 106546652 |
| chr6 | 106546864 | 106547064 |
| chr6 | 106547160 | 106547440 |
| chr6 | 106548070 | 106548190 |
| chr6 | 106548669 | 106548789 |
| chr6 | 106551342 | 106551462 |
| chr6 | 106551965 | 106552085 |
| chr6 | 106552693 | 106553813 |
| chr6 | 106554189 | 106554429 |
| chr6 | 106554773 | 106555373 |
| chr6 | 107637426 | 107637546 |
| chr6 | 110659125 | 110659245 |
| chr6 | 113682672 | 113682792 |
| chr6 | 114262156 | 114262316 |
| chr6 | 114262820 | 114262980 |
| chr6 | 114264336 | 114264536 |
| chr6 | 114264559 | 114264759 |
| chr6 | 114265388 | 114265628 |
| chr6 | 114266459 | 114266699 |
| chr6 | 114267101 | 114267381 |
| chr6 | 114270076 | 114270477 |
| chr6 | 114274371 | 114274651 |
| chr6 | 114277096 | 114277376 |
| chr6 | 114277719 | 114277919 |
| chr6 | 114279751 | 114279991 |
| chr6 | 114281016 | 114281256 |
| chr6 | 114291928 | 114292128 |
| chr6 | 114292133 | 114292373 |
| chr6 | 116698871 | 116698991 |
| chr6 | 117609649 | 117609969 |
| chr6 | 117619714 | 117619834 |
| chr6 | 117620078 | 117620198 |
| chr6 | 117622078 | 117622358 |
| chr6 | 117624707 | 117624827 |
| chr6 | 117628790 | 117628910 |
| chr6 | 117629903 | 117630143 |
| chr6 | 117631223 | 117631463 |
| chr6 | 117632131 | 117632331 |
| chr6 | 117633786 | 117633906 |
| chr6 | 117638250 | 117638490 |
| chr6 | 117639302 | 117639462 |

|      |           |           |
|------|-----------|-----------|
| chr6 | 117639856 | 117639976 |
| chr6 | 117640078 | 117640318 |
| chr6 | 117640971 | 117641251 |
| chr6 | 117642369 | 117642609 |
| chr6 | 117645436 | 117645636 |
| chr6 | 117646711 | 117646831 |
| chr6 | 117647341 | 117647621 |
| chr6 | 117649872 | 117650072 |
| chr6 | 117650450 | 117650650 |
| chr6 | 117658278 | 117658558 |
| chr6 | 117662245 | 117662525 |
| chr6 | 117662558 | 117662798 |
| chr6 | 117663514 | 117663754 |
| chr6 | 117665203 | 117665443 |
| chr6 | 117674102 | 117674382 |
| chr6 | 117677774 | 117678094 |
| chr6 | 117678949 | 117679189 |
| chr6 | 117680952 | 117681192 |
| chr6 | 117681456 | 117681616 |
| chr6 | 117683756 | 117684036 |
| chr6 | 117684907 | 117685027 |
| chr6 | 117686174 | 117686414 |
| chr6 | 117686683 | 117686963 |
| chr6 | 117687225 | 117687465 |
| chr6 | 117700171 | 117700371 |
| chr6 | 117704435 | 117704715 |
| chr6 | 117706794 | 117707074 |
| chr6 | 117708006 | 117708206 |
| chr6 | 117708929 | 117709209 |
| chr6 | 117710500 | 117711020 |
| chr6 | 117714335 | 117714535 |
| chr6 | 117715276 | 117715556 |
| chr6 | 117715719 | 117715959 |
| chr6 | 117716138 | 117716258 |
| chr6 | 117717308 | 117717468 |
| chr6 | 117718058 | 117718362 |
| chr6 | 117724250 | 117724490 |
| chr6 | 117725396 | 117725636 |
| chr6 | 117728057 | 117728177 |
| chr6 | 117730694 | 117730854 |
| chr6 | 117735594 | 117735794 |
| chr6 | 117737370 | 117737530 |
| chr6 | 117739566 | 117739726 |

|      |           |           |
|------|-----------|-----------|
| chr6 | 117741434 | 117741554 |
| chr6 | 117746637 | 117746877 |
| chr6 | 119713686 | 119713806 |
| chr6 | 122744949 | 122745069 |
| chr6 | 125748324 | 125748444 |
| chr6 | 128291318 | 128291478 |
| chr6 | 128294114 | 128294354 |
| chr6 | 128294750 | 128295030 |
| chr6 | 128297744 | 128297984 |
| chr6 | 128298013 | 128298253 |
| chr6 | 128302207 | 128302487 |
| chr6 | 128303930 | 128304170 |
| chr6 | 128304334 | 128304574 |
| chr6 | 128306822 | 128307062 |
| chr6 | 128311871 | 128312071 |
| chr6 | 128312387 | 128312587 |
| chr6 | 128313735 | 128313935 |
| chr6 | 128316302 | 128316502 |
| chr6 | 128316537 | 128316737 |
| chr6 | 128317989 | 128318189 |
| chr6 | 128319816 | 128320096 |
| chr6 | 128322246 | 128322446 |
| chr6 | 128324259 | 128324459 |
| chr6 | 128326168 | 128326448 |
| chr6 | 128327085 | 128327285 |
| chr6 | 128329106 | 128329306 |
| chr6 | 128330223 | 128330463 |
| chr6 | 128385820 | 128386020 |
| chr6 | 128388660 | 128388940 |
| chr6 | 128399910 | 128400110 |
| chr6 | 128403562 | 128403802 |
| chr6 | 128404814 | 128405014 |
| chr6 | 128410825 | 128411145 |
| chr6 | 128505563 | 128505883 |
| chr6 | 128540013 | 128540293 |
| chr6 | 128561137 | 128561337 |
| chr6 | 128563606 | 128563806 |
| chr6 | 128642913 | 128643473 |
| chr6 | 128718651 | 128718891 |
| chr6 | 128730367 | 128730567 |
| chr6 | 128812835 | 128813145 |
| chr6 | 128841353 | 128841553 |
| chr6 | 131879221 | 131879341 |

|      |           |           |
|------|-----------|-----------|
| chr6 | 134943400 | 134943520 |
| chr6 | 137947928 | 137948048 |
| chr6 | 141001360 | 141001480 |
| chr6 | 144004921 | 144005041 |
| chr6 | 147006785 | 147006905 |
| chr6 | 150144941 | 150145061 |
| chr6 | 153168682 | 153168802 |
| chr6 | 156198885 | 156199005 |
| chr6 | 157099054 | 157100614 |
| chr6 | 157144301 | 157144421 |
| chr6 | 157150317 | 157150597 |
| chr6 | 157153609 | 157153729 |
| chr6 | 157161519 | 157161639 |
| chr6 | 157188831 | 157188951 |
| chr6 | 157192666 | 157192866 |
| chr6 | 157196699 | 157196819 |
| chr6 | 157197741 | 157197861 |
| chr6 | 157199783 | 157199903 |
| chr6 | 157218841 | 157218961 |
| chr6 | 157222462 | 157222702 |
| chr6 | 157242609 | 157242729 |
| chr6 | 157256554 | 157256754 |
| chr6 | 157338267 | 157338387 |
| chr6 | 157357030 | 157357150 |
| chr6 | 157389848 | 157389968 |
| chr6 | 157405700 | 157406057 |
| chr6 | 157431550 | 157431750 |
| chr6 | 157432599 | 157432719 |
| chr6 | 157442479 | 157442599 |
| chr6 | 157443638 | 157443758 |
| chr6 | 157454111 | 157454391 |
| chr6 | 157469741 | 157470101 |
| chr6 | 157488126 | 157488366 |
| chr6 | 157495096 | 157495296 |
| chr6 | 157495939 | 157496179 |
| chr6 | 157502087 | 157502327 |
| chr6 | 157505361 | 157505681 |
| chr6 | 157507473 | 157507753 |
| chr6 | 157510724 | 157510964 |
| chr6 | 157511117 | 157511397 |
| chr6 | 157517253 | 157517493 |
| chr6 | 157519892 | 157520092 |
| chr6 | 157521830 | 157522630 |

|      |           |           |
|------|-----------|-----------|
| chr6 | 157524944 | 157525184 |
| chr6 | 157527282 | 157529042 |
| chr6 | 159210066 | 159210186 |
| chr6 | 159425646 | 159425766 |
| chr6 | 160390317 | 160390517 |
| chr6 | 160412165 | 160412405 |
| chr6 | 160429983 | 160430223 |
| chr6 | 160431667 | 160431867 |
| chr6 | 160445549 | 160445789 |
| chr6 | 160448161 | 160448401 |
| chr6 | 160450514 | 160450754 |
| chr6 | 160453523 | 160453803 |
| chr6 | 160453901 | 160454181 |
| chr6 | 160455382 | 160455622 |
| chr6 | 160461533 | 160461813 |
| chr6 | 160464109 | 160464389 |
| chr6 | 160465477 | 160465757 |
| chr6 | 160466725 | 160466965 |
| chr6 | 160467463 | 160467743 |
| chr6 | 160468139 | 160468419 |
| chr6 | 160468761 | 160469001 |
| chr6 | 160469350 | 160469630 |
| chr6 | 160471454 | 160471734 |
| chr6 | 160477386 | 160477626 |
| chr6 | 160478985 | 160479225 |
| chr6 | 160479913 | 160480153 |
| chr6 | 160481523 | 160481803 |
| chr6 | 160482466 | 160483012 |
| chr6 | 160483507 | 160483707 |
| chr6 | 160484434 | 160484674 |
| chr6 | 160485377 | 160485617 |
| chr6 | 160485784 | 160485984 |
| chr6 | 160489228 | 160489468 |
| chr6 | 160490874 | 160491114 |
| chr6 | 160492884 | 160493124 |
| chr6 | 160493736 | 160493976 |
| chr6 | 160494232 | 160494512 |
| chr6 | 160494777 | 160495017 |
| chr6 | 160496813 | 160497093 |
| chr6 | 160499173 | 160499453 |
| chr6 | 160500595 | 160500835 |
| chr6 | 160501093 | 160501373 |
| chr6 | 160504959 | 160505239 |



|      |           |           |
|------|-----------|-----------|
| chr6 | 160505974 | 160506214 |
| chr6 | 160509001 | 160509241 |
| chr6 | 160510071 | 160510351 |
| chr6 | 160510921 | 160511161 |
| chr6 | 160517443 | 160517683 |
| chr6 | 160523486 | 160523766 |
| chr6 | 160524712 | 160524912 |
| chr6 | 160525690 | 160526130 |
| chr6 | 161412853 | 161413212 |
| chr6 | 161455265 | 161455505 |
| chr6 | 161469257 | 161469417 |
| chr6 | 161469629 | 161471029 |
| chr6 | 161491620 | 161491900 |
| chr6 | 161494406 | 161494686 |
| chr6 | 161501851 | 161502131 |
| chr6 | 161505470 | 161505710 |
| chr6 | 161507360 | 161507757 |
| chr6 | 161508692 | 161509012 |
| chr6 | 161510288 | 161510568 |
| chr6 | 161512351 | 161512631 |
| chr6 | 161512988 | 161513228 |
| chr6 | 161513948 | 161514148 |
| chr6 | 161514743 | 161514943 |
| chr6 | 161518059 | 161518259 |
| chr6 | 161519209 | 161519369 |
| chr6 | 161519371 | 161519531 |
| chr6 | 161522853 | 161523093 |
| chr6 | 161523653 | 161523853 |
| chr6 | 161527521 | 161527761 |
| chr6 | 161528865 | 161529065 |
| chr6 | 161529712 | 161529952 |
| chr6 | 161530726 | 161531006 |
| chr6 | 161532808 | 161533048 |
| chr6 | 161533632 | 161533872 |
| chr6 | 161536104 | 161536384 |
| chr6 | 161537811 | 161537971 |
| chr6 | 161551808 | 161552008 |
| chr6 | 162237889 | 162238009 |
| chr6 | 165248508 | 165248628 |
| chr6 | 165557489 | 165557609 |
| chr6 | 168289043 | 168289163 |
| chr7 | 46179     | 46299     |
| chr7 | 3082132   | 3082252   |

|      |          |          |
|------|----------|----------|
| chr7 | 6098241  | 6098361  |
| chr7 | 9110918  | 9111038  |
| chr7 | 12115664 | 12115784 |
| chr7 | 13935461 | 13935741 |
| chr7 | 13940293 | 13940533 |
| chr7 | 13945999 | 13946279 |
| chr7 | 13947349 | 13947549 |
| chr7 | 13949190 | 13949390 |
| chr7 | 13950797 | 13950997 |
| chr7 | 13971110 | 13971390 |
| chr7 | 13975306 | 13975546 |
| chr7 | 13978686 | 13978926 |
| chr7 | 14016998 | 14017158 |
| chr7 | 14025670 | 14025870 |
| chr7 | 14026203 | 14026363 |
| chr7 | 14027654 | 14027854 |
| chr7 | 14028247 | 14028447 |
| chr7 | 14028574 | 14028734 |
| chr7 | 15126093 | 15126213 |
| chr7 | 18156491 | 18156611 |
| chr7 | 21163295 | 21163415 |
| chr7 | 21582858 | 21583218 |
| chr7 | 21584575 | 21584815 |
| chr7 | 21598377 | 21598657 |
| chr7 | 21599175 | 21599455 |
| chr7 | 21600638 | 21600838 |
| chr7 | 21603789 | 21604029 |
| chr7 | 21609681 | 21609921 |
| chr7 | 21611367 | 21611647 |
| chr7 | 21621480 | 21621680 |
| chr7 | 21627630 | 21627870 |
| chr7 | 21628071 | 21628311 |
| chr7 | 21628783 | 21629063 |
| chr7 | 21630487 | 21630687 |
| chr7 | 21630798 | 21631198 |
| chr7 | 21639390 | 21639750 |
| chr7 | 21640280 | 21640560 |
| chr7 | 21640572 | 21640852 |
| chr7 | 21641004 | 21641244 |
| chr7 | 21646001 | 21646201 |
| chr7 | 21646207 | 21646407 |
| chr7 | 21654690 | 21654930 |
| chr7 | 21655775 | 21655975 |

|      |          |          |
|------|----------|----------|
| chr7 | 21657195 | 21657435 |
| chr7 | 21658658 | 21658898 |
| chr7 | 21659514 | 21659754 |
| chr7 | 21675480 | 21675720 |
| chr7 | 21677174 | 21677374 |
| chr7 | 21678499 | 21678739 |
| chr7 | 21695404 | 21695644 |
| chr7 | 21698412 | 21698652 |
| chr7 | 21721109 | 21721399 |
| chr7 | 21723341 | 21723621 |
| chr7 | 21726674 | 21726914 |
| chr7 | 21726952 | 21727192 |
| chr7 | 21730340 | 21730540 |
| chr7 | 21737641 | 21737881 |
| chr7 | 21742273 | 21742473 |
| chr7 | 21744008 | 21744288 |
| chr7 | 21745036 | 21745196 |
| chr7 | 21747264 | 21747504 |
| chr7 | 21750125 | 21750365 |
| chr7 | 21751283 | 21751523 |
| chr7 | 21757347 | 21757587 |
| chr7 | 21760288 | 21760528 |
| chr7 | 21765375 | 21765655 |
| chr7 | 21775239 | 21775479 |
| chr7 | 21778261 | 21778541 |
| chr7 | 21779139 | 21779339 |
| chr7 | 21781544 | 21781784 |
| chr7 | 21783996 | 21784276 |
| chr7 | 21784444 | 21784724 |
| chr7 | 21788138 | 21788418 |
| chr7 | 21789237 | 21789477 |
| chr7 | 21789790 | 21790030 |
| chr7 | 21804986 | 21805266 |
| chr7 | 21813380 | 21813620 |
| chr7 | 21818528 | 21818768 |
| chr7 | 21824001 | 21824201 |
| chr7 | 21826193 | 21826433 |
| chr7 | 21826969 | 21827249 |
| chr7 | 21828809 | 21829009 |
| chr7 | 21840703 | 21840943 |
| chr7 | 21847443 | 21847723 |
| chr7 | 21856082 | 21856322 |
| chr7 | 21857775 | 21858015 |

|      |          |          |
|------|----------|----------|
| chr7 | 21882143 | 21882383 |
| chr7 | 21891139 | 21891299 |
| chr7 | 21892026 | 21892306 |
| chr7 | 21893882 | 21894122 |
| chr7 | 21901415 | 21901695 |
| chr7 | 21904093 | 21904333 |
| chr7 | 21906044 | 21906324 |
| chr7 | 21907430 | 21907670 |
| chr7 | 21908425 | 21908665 |
| chr7 | 21912885 | 21913125 |
| chr7 | 21920275 | 21920555 |
| chr7 | 21923868 | 21924068 |
| chr7 | 21932023 | 21932303 |
| chr7 | 21934191 | 21934659 |
| chr7 | 21938909 | 21939109 |
| chr7 | 21939547 | 21939787 |
| chr7 | 21940608 | 21940888 |
| chr7 | 24166243 | 24166363 |
| chr7 | 24213295 | 24213415 |
| chr7 | 27167286 | 27167406 |
| chr7 | 27203220 | 27203460 |
| chr7 | 27204486 | 27205086 |
| chr7 | 30194998 | 30195118 |
| chr7 | 33197172 | 33197292 |
| chr7 | 36211087 | 36211207 |
| chr7 | 39213848 | 39213968 |
| chr7 | 42221245 | 42221365 |
| chr7 | 45222570 | 45222690 |
| chr7 | 45932608 | 45932728 |
| chr7 | 48238245 | 48238365 |
| chr7 | 50305803 | 50305923 |
| chr7 | 50311745 | 50311865 |
| chr7 | 50313292 | 50313412 |
| chr7 | 50332136 | 50332256 |
| chr7 | 50350207 | 50350327 |
| chr7 | 50358597 | 50358757 |
| chr7 | 50367173 | 50367413 |
| chr7 | 50424001 | 50424121 |
| chr7 | 50430811 | 50430931 |
| chr7 | 50435687 | 50436087 |
| chr7 | 50438660 | 50438780 |
| chr7 | 50444200 | 50444520 |
| chr7 | 50449025 | 50449145 |

|      |          |          |
|------|----------|----------|
| chr7 | 50450181 | 50450461 |
| chr7 | 50452492 | 50452612 |
| chr7 | 50454985 | 50455225 |
| chr7 | 50459373 | 50459613 |
| chr7 | 50460036 | 50460156 |
| chr7 | 50466244 | 50466364 |
| chr7 | 50467590 | 50468350 |
| chr7 | 50474163 | 50474283 |
| chr7 | 50475583 | 50475703 |
| chr7 | 50481708 | 50481828 |
| chr7 | 50486249 | 50486369 |
| chr7 | 50493669 | 50493789 |
| chr7 | 50507618 | 50507738 |
| chr7 | 51252659 | 51252779 |
| chr7 | 54252930 | 54253050 |
| chr7 | 55086914 | 55087114 |
| chr7 | 55088354 | 55088474 |
| chr7 | 55090318 | 55090438 |
| chr7 | 55127723 | 55127843 |
| chr7 | 55144095 | 55144215 |
| chr7 | 55154320 | 55154440 |
| chr7 | 55160477 | 55160597 |
| chr7 | 55172707 | 55172827 |
| chr7 | 55179339 | 55179459 |
| chr7 | 55192195 | 55192315 |
| chr7 | 55209576 | 55209696 |
| chr7 | 55209934 | 55210174 |
| chr7 | 55210949 | 55211229 |
| chr7 | 55214245 | 55214485 |
| chr7 | 55218940 | 55219100 |
| chr7 | 55220197 | 55220397 |
| chr7 | 55221654 | 55221894 |
| chr7 | 55223480 | 55223680 |
| chr7 | 55224168 | 55224593 |
| chr7 | 55225300 | 55225500 |
| chr7 | 55227791 | 55228071 |
| chr7 | 55229137 | 55229377 |
| chr7 | 55231370 | 55231570 |
| chr7 | 55232931 | 55233171 |
| chr7 | 55236118 | 55236318 |
| chr7 | 55237998 | 55238238 |
| chr7 | 55238786 | 55238986 |
| chr7 | 55240485 | 55240866 |

|      |          |          |
|------|----------|----------|
| chr7 | 55241554 | 55241794 |
| chr7 | 55242363 | 55242668 |
| chr7 | 55247527 | 55247647 |
| chr7 | 55248938 | 55249218 |
| chr7 | 55251532 | 55251652 |
| chr7 | 55253364 | 55253484 |
| chr7 | 55259369 | 55259609 |
| chr7 | 55259702 | 55259822 |
| chr7 | 55260416 | 55260576 |
| chr7 | 55266362 | 55266602 |
| chr7 | 55267957 | 55268157 |
| chr7 | 55268824 | 55269104 |
| chr7 | 55269371 | 55269531 |
| chr7 | 55270193 | 55270473 |
| chr7 | 55272929 | 55273329 |
| chr7 | 57256068 | 57256188 |
| chr7 | 61074134 | 61074254 |
| chr7 | 64149950 | 64150070 |
| chr7 | 67159821 | 67159941 |
| chr7 | 70161161 | 70161281 |
| chr7 | 73176434 | 73176554 |
| chr7 | 76208153 | 76208273 |
| chr7 | 79221647 | 79221767 |
| chr7 | 82222745 | 82222865 |
| chr7 | 82387840 | 82388080 |
| chr7 | 82389907 | 82390147 |
| chr7 | 82390621 | 82390861 |
| chr7 | 82430790 | 82430950 |
| chr7 | 82434954 | 82435194 |
| chr7 | 82451779 | 82452019 |
| chr7 | 82453501 | 82453781 |
| chr7 | 82455860 | 82456020 |
| chr7 | 82457135 | 82457335 |
| chr7 | 82464895 | 82465095 |
| chr7 | 82467475 | 82467715 |
| chr7 | 82470719 | 82470879 |
| chr7 | 82474573 | 82474813 |
| chr7 | 82475836 | 82475996 |
| chr7 | 82476408 | 82476608 |
| chr7 | 82478130 | 82478330 |
| chr7 | 82497403 | 82497563 |
| chr7 | 82508595 | 82508835 |
| chr7 | 82531911 | 82532111 |

|      |          |          |
|------|----------|----------|
| chr7 | 82538140 | 82538380 |
| chr7 | 82543798 | 82546198 |
| chr7 | 82578778 | 82580818 |
| chr7 | 82581171 | 82586251 |
| chr7 | 82595084 | 82595804 |
| chr7 | 82763548 | 82764988 |
| chr7 | 82784045 | 82785725 |
| chr7 | 82791644 | 82791924 |
| chr7 | 85280011 | 85280131 |
| chr7 | 88294941 | 88295061 |
| chr7 | 90773135 | 90773255 |
| chr7 | 91440299 | 91440419 |
| chr7 | 92244406 | 92244646 |
| chr7 | 92247333 | 92247573 |
| chr7 | 92252294 | 92252454 |
| chr7 | 92300694 | 92300894 |
| chr7 | 92354883 | 92355163 |
| chr7 | 92403957 | 92404197 |
| chr7 | 92462400 | 92462640 |
| chr7 | 94463828 | 94463948 |
| chr7 | 97464749 | 97464869 |
| chr7 | 98627403 | 98627523 |
| chr7 | 98628156 | 98628356 |
| chr7 | 98630601 | 98630801 |
| chr7 | 98633118 | 98633358 |
| chr7 | 98633370 | 98633490 |
| chr7 | 98634629 | 98634869 |
| chr7 | 98635959 | 98636199 |
| chr7 | 98637949 | 98638229 |
| chr7 | 98639396 | 98639516 |
| chr7 | 98639677 | 98639917 |
| chr7 | 98643252 | 98643492 |
| chr7 | 98645285 | 98645577 |
| chr7 | 98647118 | 98647398 |
| chr7 | 98648009 | 98648129 |
| chr7 | 98648476 | 98648676 |
| chr7 | 98648921 | 98649121 |
| chr7 | 98649808 | 98650088 |
| chr7 | 98652350 | 98652550 |
| chr7 | 98653966 | 98654086 |
| chr7 | 98654760 | 98654960 |
| chr7 | 98654987 | 98655227 |
| chr7 | 98658155 | 98658395 |

|      |           |           |
|------|-----------|-----------|
| chr7 | 98659360  | 98659520  |
| chr7 | 98676707  | 98676827  |
| chr7 | 98690625  | 98690745  |
| chr7 | 98697735  | 98697855  |
| chr7 | 98731952  | 98732072  |
| chr7 | 98739171  | 98739291  |
| chr7 | 100468043 | 100468163 |
| chr7 | 103488968 | 103489088 |
| chr7 | 104681354 | 104681514 |
| chr7 | 104682995 | 104683115 |
| chr7 | 104685111 | 104685231 |
| chr7 | 104687121 | 104687241 |
| chr7 | 104688392 | 104688512 |
| chr7 | 104696127 | 104696247 |
| chr7 | 104700194 | 104700314 |
| chr7 | 104702567 | 104702767 |
| chr7 | 104703792 | 104704032 |
| chr7 | 104704383 | 104704583 |
| chr7 | 104707113 | 104707313 |
| chr7 | 104710087 | 104710207 |
| chr7 | 104714014 | 104714174 |
| chr7 | 104715035 | 104715315 |
| chr7 | 104716408 | 104716608 |
| chr7 | 104717404 | 104717644 |
| chr7 | 104717694 | 104717934 |
| chr7 | 104719251 | 104719451 |
| chr7 | 104722089 | 104722289 |
| chr7 | 104729254 | 104729374 |
| chr7 | 104730447 | 104730727 |
| chr7 | 104731645 | 104731885 |
| chr7 | 104737551 | 104737671 |
| chr7 | 104741813 | 104742093 |
| chr7 | 104742326 | 104742646 |
| chr7 | 104745123 | 104745343 |
| chr7 | 104745872 | 104746152 |
| chr7 | 104746257 | 104746497 |
| chr7 | 104746953 | 104747233 |
| chr7 | 104747560 | 104747720 |
| chr7 | 104747790 | 104748390 |
| chr7 | 104748909 | 104749109 |
| chr7 | 104749371 | 104749691 |
| chr7 | 104750174 | 104750294 |
| chr7 | 104750670 | 104751106 |



|      |           |           |
|------|-----------|-----------|
| chr7 | 104751166 | 104751366 |
| chr7 | 104752265 | 104753785 |
| chr7 | 106500376 | 106500496 |
| chr7 | 109568287 | 109568407 |
| chr7 | 112579860 | 112579980 |
| chr7 | 115584508 | 115584628 |
| chr7 | 118634525 | 118634645 |
| chr7 | 121513502 | 121513662 |
| chr7 | 121568162 | 121568322 |
| chr7 | 121607954 | 121608234 |
| chr7 | 121612550 | 121612790 |
| chr7 | 121616174 | 121616374 |
| chr7 | 121616791 | 121616951 |
| chr7 | 121623677 | 121623917 |
| chr7 | 121623975 | 121624215 |
| chr7 | 121636387 | 121636667 |
| chr7 | 121637876 | 121638116 |
| chr7 | 121644610 | 121644770 |
| chr7 | 121650385 | 121653945 |
| chr7 | 121659129 | 121659369 |
| chr7 | 121668551 | 121668751 |
| chr7 | 121671470 | 121671670 |
| chr7 | 121674058 | 121674258 |
| chr7 | 121674283 | 121674483 |
| chr7 | 121676594 | 121676794 |
| chr7 | 121678755 | 121678995 |
| chr7 | 121679454 | 121679694 |
| chr7 | 121680811 | 121681091 |
| chr7 | 121682609 | 121682849 |
| chr7 | 121684428 | 121684668 |
| chr7 | 121691428 | 121691628 |
| chr7 | 121691876 | 121692036 |
| chr7 | 121693907 | 121694147 |
| chr7 | 121694947 | 121695187 |
| chr7 | 121698804 | 121699044 |
| chr7 | 121699754 | 121699994 |
| chr7 | 121701083 | 121701323 |
| chr7 | 121890721 | 121890841 |
| chr7 | 124462493 | 124462693 |
| chr7 | 124463971 | 124464171 |
| chr7 | 124465258 | 124465458 |
| chr7 | 124467213 | 124467413 |
| chr7 | 124469251 | 124469451 |

|      |           |           |
|------|-----------|-----------|
| chr7 | 124475280 | 124475520 |
| chr7 | 124481009 | 124481249 |
| chr7 | 124482818 | 124483058 |
| chr7 | 124486943 | 124487103 |
| chr7 | 124491885 | 124492045 |
| chr7 | 124492968 | 124493248 |
| chr7 | 124498968 | 124499208 |
| chr7 | 124503388 | 124503708 |
| chr7 | 124510909 | 124511149 |
| chr7 | 124532276 | 124532476 |
| chr7 | 124537122 | 124537322 |
| chr7 | 124893669 | 124893789 |
| chr7 | 127953183 | 127953303 |
| chr7 | 131071641 | 131071761 |
| chr7 | 134083351 | 134083471 |
| chr7 | 137098935 | 137099055 |
| chr7 | 140108036 | 140108156 |
| chr7 | 140426204 | 140426404 |
| chr7 | 140432832 | 140432952 |
| chr7 | 140434343 | 140434623 |
| chr7 | 140439558 | 140439798 |
| chr7 | 140447130 | 140447330 |
| chr7 | 140449032 | 140449272 |
| chr7 | 140453033 | 140453233 |
| chr7 | 140453929 | 140454089 |
| chr7 | 140455177 | 140455297 |
| chr7 | 140456003 | 140456123 |
| chr7 | 140473385 | 140473505 |
| chr7 | 140476659 | 140476939 |
| chr7 | 140477732 | 140477932 |
| chr7 | 140481334 | 140481534 |
| chr7 | 140482768 | 140483008 |
| chr7 | 140487265 | 140487465 |
| chr7 | 140494067 | 140494307 |
| chr7 | 140499046 | 140499166 |
| chr7 | 140500121 | 140500321 |
| chr7 | 140501165 | 140501405 |
| chr7 | 140505032 | 140505152 |
| chr7 | 140505155 | 140505275 |
| chr7 | 140506343 | 140506463 |
| chr7 | 140507710 | 140507996 |
| chr7 | 140508005 | 140508205 |
| chr7 | 140508643 | 140508843 |

|      |           |           |
|------|-----------|-----------|
| chr7 | 140511699 | 140511819 |
| chr7 | 140534400 | 140534680 |
| chr7 | 140549861 | 140550061 |
| chr7 | 140558679 | 140558799 |
| chr7 | 140567391 | 140567511 |
| chr7 | 140614151 | 140614271 |
| chr7 | 140617939 | 140618059 |
| chr7 | 140624314 | 140624554 |
| chr7 | 143134183 | 143134303 |
| chr7 | 146168358 | 146168478 |
| chr7 | 148504687 | 148504847 |
| chr7 | 148506104 | 148506304 |
| chr7 | 148506341 | 148506541 |
| chr7 | 148507365 | 148507565 |
| chr7 | 148508664 | 148508864 |
| chr7 | 148510999 | 148511279 |
| chr7 | 148511948 | 148512188 |
| chr7 | 148512537 | 148512697 |
| chr7 | 148513722 | 148513922 |
| chr7 | 148514258 | 148514538 |
| chr7 | 148514948 | 148515228 |
| chr7 | 148516040 | 148516240 |
| chr7 | 148516633 | 148516833 |
| chr7 | 148523494 | 148523774 |
| chr7 | 148524206 | 148524406 |
| chr7 | 148525781 | 148526021 |
| chr7 | 148526759 | 148526999 |
| chr7 | 148529683 | 148529883 |
| chr7 | 148533862 | 148534142 |
| chr7 | 148543505 | 148543745 |
| chr7 | 148544231 | 148544431 |
| chr7 | 149190967 | 149191087 |
| chr7 | 151833862 | 151834062 |
| chr7 | 151835808 | 151836048 |
| chr7 | 151836227 | 151836387 |
| chr7 | 151836717 | 151836917 |
| chr7 | 151841318 | 151841438 |
| chr7 | 151841741 | 151842021 |
| chr7 | 151842188 | 151842428 |
| chr7 | 151842502 | 151842622 |
| chr7 | 151842904 | 151843024 |
| chr7 | 151843631 | 151843871 |
| chr7 | 151845117 | 151846237 |

|      |           |           |
|------|-----------|-----------|
| chr7 | 151847894 | 151848138 |
| chr7 | 151848476 | 151848716 |
| chr7 | 151849774 | 151850054 |
| chr7 | 151850370 | 151850490 |
| chr7 | 151851042 | 151851282 |
| chr7 | 151851300 | 151851580 |
| chr7 | 151852948 | 151853188 |
| chr7 | 151853240 | 151853480 |
| chr7 | 151854787 | 151855067 |
| chr7 | 151855929 | 151856169 |
| chr7 | 151859196 | 151860916 |
| chr7 | 151864226 | 151864466 |
| chr7 | 151866222 | 151866382 |
| chr7 | 151868307 | 151868467 |
| chr7 | 151871171 | 151871371 |
| chr7 | 151873265 | 151875105 |
| chr7 | 151876904 | 151877224 |
| chr7 | 151877777 | 151879697 |
| chr7 | 151880009 | 151880289 |
| chr7 | 151882599 | 151882759 |
| chr7 | 151884333 | 151884573 |
| chr7 | 151884745 | 151884985 |
| chr7 | 151891053 | 151891429 |
| chr7 | 151891468 | 151891708 |
| chr7 | 151892943 | 151893143 |
| chr7 | 151893619 | 151893739 |
| chr7 | 151896313 | 151896593 |
| chr7 | 151899963 | 151900203 |
| chr7 | 151902150 | 151902350 |
| chr7 | 151904328 | 151904568 |
| chr7 | 151917593 | 151917833 |
| chr7 | 151919038 | 151919198 |
| chr7 | 151919612 | 151919812 |
| chr7 | 151921041 | 151921321 |
| chr7 | 151921470 | 151921750 |
| chr7 | 151926959 | 151927159 |
| chr7 | 151927255 | 151927455 |
| chr7 | 151932859 | 151933059 |
| chr7 | 151935751 | 151935951 |
| chr7 | 151944985 | 151945705 |
| chr7 | 151946919 | 151947079 |
| chr7 | 151947894 | 151948094 |
| chr7 | 151948979 | 151949219 |

|      |           |           |
|------|-----------|-----------|
| chr7 | 151949575 | 151949855 |
| chr7 | 151955236 | 151955356 |
| chr7 | 151960057 | 151960257 |
| chr7 | 151962068 | 151962348 |
| chr7 | 151965673 | 151965793 |
| chr7 | 151970730 | 151971010 |
| chr7 | 151981970 | 151982090 |
| chr7 | 152007005 | 152007205 |
| chr7 | 152008836 | 152009076 |
| chr7 | 152009586 | 152009706 |
| chr7 | 152012202 | 152012442 |
| chr7 | 152027636 | 152027876 |
| chr7 | 152031547 | 152031667 |
| chr7 | 152050479 | 152050599 |
| chr7 | 152055615 | 152055815 |
| chr7 | 152132650 | 152132930 |
| chr7 | 152198901 | 152199021 |
| chr7 | 155201733 | 155201853 |
| chr7 | 158215587 | 158215707 |
| chr8 | 191016    | 191136    |
| chr8 | 3199374   | 3199494   |
| chr8 | 6209365   | 6209485   |
| chr8 | 9217314   | 9217434   |
| chr8 | 12598072  | 12598192  |
| chr8 | 12957414  | 12957534  |
| chr8 | 15598638  | 15598758  |
| chr8 | 18618704  | 18618824  |
| chr8 | 21668181  | 21668301  |
| chr8 | 23060195  | 23060315  |
| chr8 | 24736547  | 24736667  |
| chr8 | 27740006  | 27740126  |
| chr8 | 30784011  | 30784131  |
| chr8 | 31445435  | 31445555  |
| chr8 | 33903399  | 33903519  |
| chr8 | 36911247  | 36911367  |
| chr8 | 38225289  | 38225409  |
| chr8 | 38226217  | 38226337  |
| chr8 | 38236830  | 38236950  |
| chr8 | 38239948  | 38240068  |
| chr8 | 38241570  | 38241690  |
| chr8 | 38243773  | 38243893  |
| chr8 | 38271093  | 38271608  |
| chr8 | 38271618  | 38271858  |

|      |          |          |
|------|----------|----------|
| chr8 | 38272011 | 38272442 |
| chr8 | 38273350 | 38273590 |
| chr8 | 38274758 | 38274998 |
| chr8 | 38275328 | 38275568 |
| chr8 | 38275678 | 38275958 |
| chr8 | 38277031 | 38277271 |
| chr8 | 38279246 | 38279526 |
| chr8 | 38280477 | 38280757 |
| chr8 | 38282001 | 38282241 |
| chr8 | 38283581 | 38283821 |
| chr8 | 38285384 | 38285664 |
| chr8 | 38285772 | 38286114 |
| chr8 | 38287172 | 38287492 |
| chr8 | 38297756 | 38297956 |
| chr8 | 38299359 | 38299479 |
| chr8 | 38314822 | 38315102 |
| chr8 | 38318518 | 38318718 |
| chr8 | 38322286 | 38322406 |
| chr8 | 38361319 | 38361439 |
| chr8 | 38369771 | 38369891 |
| chr8 | 39911590 | 39911710 |
| chr8 | 47823176 | 47823296 |
| chr8 | 50834280 | 50834400 |
| chr8 | 53834434 | 53834554 |
| chr8 | 56866720 | 56866840 |
| chr8 | 59873576 | 59873696 |
| chr8 | 62919631 | 62919751 |
| chr8 | 65922265 | 65922385 |
| chr8 | 68927532 | 68927652 |
| chr8 | 71932026 | 71932146 |
| chr8 | 74954820 | 74954940 |
| chr8 | 75822790 | 75822910 |
| chr8 | 77616298 | 77618938 |
| chr8 | 77619751 | 77620311 |
| chr8 | 77690419 | 77690699 |
| chr8 | 77694341 | 77694541 |
| chr8 | 77745507 | 77745707 |
| chr8 | 77754828 | 77755068 |
| chr8 | 77761177 | 77761417 |
| chr8 | 77761727 | 77761967 |
| chr8 | 77762419 | 77762659 |
| chr8 | 77763099 | 77764579 |
| chr8 | 77764626 | 77765186 |

|      |           |           |
|------|-----------|-----------|
| chr8 | 77765336  | 77766496  |
| chr8 | 77766510  | 77768678  |
| chr8 | 77775250  | 77775450  |
| chr8 | 77775464  | 77776824  |
| chr8 | 77819796  | 77819916  |
| chr8 | 77998599  | 77998719  |
| chr8 | 81002953  | 81003073  |
| chr8 | 84219787  | 84219907  |
| chr8 | 87232451  | 87232571  |
| chr8 | 90236933  | 90237053  |
| chr8 | 93247302  | 93247422  |
| chr8 | 96256607  | 96256727  |
| chr8 | 99258127  | 99258247  |
| chr8 | 102261631 | 102261751 |
| chr8 | 105261665 | 105261785 |
| chr8 | 108269977 | 108270097 |
| chr8 | 111280516 | 111280636 |
| chr8 | 114290765 | 114290885 |
| chr8 | 117293824 | 117293944 |
| chr8 | 120294237 | 120294357 |
| chr8 | 123304544 | 123304664 |
| chr8 | 126311205 | 126311325 |
| chr8 | 128747661 | 128752301 |
| chr8 | 128752454 | 128753694 |
| chr8 | 129312681 | 129312801 |
| chr8 | 130459351 | 130459471 |
| chr8 | 131024973 | 131025093 |
| chr8 | 132328118 | 132328238 |
| chr8 | 135328522 | 135328642 |
| chr8 | 138333909 | 138334029 |
| chr8 | 141339218 | 141339338 |
| chr8 | 144345681 | 144345801 |
| chr9 | 212701    | 212821    |
| chr9 | 3214756   | 3214876   |
| chr9 | 6215676   | 6215796   |
| chr9 | 8317827   | 8317987   |
| chr9 | 8319778   | 8320018   |
| chr9 | 8331538   | 8331778   |
| chr9 | 8338864   | 8339104   |
| chr9 | 8340285   | 8340525   |
| chr9 | 8341038   | 8341318   |
| chr9 | 8341675   | 8341995   |
| chr9 | 8375892   | 8376132   |

|      |          |          |
|------|----------|----------|
| chr9 | 8376566  | 8376766  |
| chr9 | 8389179  | 8389459  |
| chr9 | 8404478  | 8404718  |
| chr9 | 8436540  | 8436740  |
| chr9 | 8437138  | 8437298  |
| chr9 | 8449664  | 8449904  |
| chr9 | 8454486  | 8454686  |
| chr9 | 8460178  | 8460630  |
| chr9 | 8465450  | 8465690  |
| chr9 | 8470939  | 8471139  |
| chr9 | 8484108  | 8484388  |
| chr9 | 8485175  | 8485375  |
| chr9 | 8485755  | 8486355  |
| chr9 | 8492820  | 8493020  |
| chr9 | 8497154  | 8497354  |
| chr9 | 8499603  | 8499883  |
| chr9 | 8500746  | 8501066  |
| chr9 | 8504212  | 8504452  |
| chr9 | 8507247  | 8507487  |
| chr9 | 8517838  | 8518438  |
| chr9 | 8521271  | 8521551  |
| chr9 | 8523418  | 8523618  |
| chr9 | 8524684  | 8525105  |
| chr9 | 8526535  | 8526735  |
| chr9 | 8527248  | 8527448  |
| chr9 | 8528378  | 8528538  |
| chr9 | 8528539  | 8528819  |
| chr9 | 8633267  | 8633507  |
| chr9 | 8636651  | 8636891  |
| chr9 | 8733731  | 8733891  |
| chr9 | 9228047  | 9228167  |
| chr9 | 12229019 | 12229139 |
| chr9 | 15239973 | 15240093 |
| chr9 | 18261259 | 18261379 |
| chr9 | 21405303 | 21405423 |
| chr9 | 21968152 | 21968296 |
| chr9 | 21968674 | 21968818 |
| chr9 | 21969677 | 21969845 |
| chr9 | 21970880 | 21971216 |
| chr9 | 21972359 | 21972479 |
| chr9 | 21973361 | 21973481 |
| chr9 | 21974173 | 21974293 |
| chr9 | 21974470 | 21974830 |



|      |          |          |
|------|----------|----------|
| chr9 | 21974956 | 21975076 |
| chr9 | 21975080 | 21975200 |
| chr9 | 21975634 | 21975754 |
| chr9 | 21978382 | 21978502 |
| chr9 | 21978917 | 21979037 |
| chr9 | 21986162 | 21986282 |
| chr9 | 21986788 | 21986908 |
| chr9 | 21988835 | 21988955 |
| chr9 | 21990396 | 21990516 |
| chr9 | 21991407 | 21991527 |
| chr9 | 21991691 | 21991811 |
| chr9 | 21991862 | 21991982 |
| chr9 | 21993903 | 21994023 |
| chr9 | 21994127 | 21994463 |
| chr9 | 24478990 | 24479110 |
| chr9 | 26531631 | 26531751 |
| chr9 | 27483899 | 27484019 |
| chr9 | 30500192 | 30500312 |
| chr9 | 32516803 | 32516923 |
| chr9 | 33524715 | 33524835 |
| chr9 | 34614620 | 34614740 |
| chr9 | 34619336 | 34619456 |
| chr9 | 34619560 | 34619680 |
| chr9 | 34621404 | 34621604 |
| chr9 | 34621961 | 34622225 |
| chr9 | 34622294 | 34622574 |
| chr9 | 34622642 | 34622882 |
| chr9 | 34623277 | 34623397 |
| chr9 | 34623406 | 34623777 |
| chr9 | 34623812 | 34624092 |
| chr9 | 34624111 | 34624231 |
| chr9 | 34625348 | 34625468 |
| chr9 | 34625694 | 34625854 |
| chr9 | 34626758 | 34626878 |
| chr9 | 34627104 | 34627224 |
| chr9 | 34627692 | 34628012 |
| chr9 | 34631098 | 34631218 |
| chr9 | 36639382 | 36639502 |
| chr9 | 40585735 | 40585855 |
| chr9 | 44863571 | 44863691 |
| chr9 | 71034143 | 71034263 |
| chr9 | 74048565 | 74048685 |
| chr9 | 77114214 | 77114334 |

|      |           |           |
|------|-----------|-----------|
| chr9 | 78831354  | 78831474  |
| chr9 | 80118181  | 80118301  |
| chr9 | 83121551  | 83121671  |
| chr9 | 86127479  | 86127599  |
| chr9 | 87285649  | 87285889  |
| chr9 | 87317010  | 87317398  |
| chr9 | 87322692  | 87322892  |
| chr9 | 87325488  | 87325768  |
| chr9 | 87338435  | 87338675  |
| chr9 | 87339084  | 87339324  |
| chr9 | 87342541  | 87342901  |
| chr9 | 87356744  | 87356904  |
| chr9 | 87359817  | 87360057  |
| chr9 | 87366850  | 87367050  |
| chr9 | 87425395  | 87425555  |
| chr9 | 87475898  | 87476058  |
| chr9 | 87482131  | 87482371  |
| chr9 | 87486637  | 87486797  |
| chr9 | 87549021  | 87549261  |
| chr9 | 87563322  | 87563602  |
| chr9 | 87570174  | 87570454  |
| chr9 | 87635059  | 87635339  |
| chr9 | 87636139  | 87636379  |
| chr9 | 89157006  | 89157126  |
| chr9 | 92158165  | 92158285  |
| chr9 | 95271801  | 95271921  |
| chr9 | 98273731  | 98273851  |
| chr9 | 101278481 | 101278601 |
| chr9 | 104291752 | 104291872 |
| chr9 | 107293961 | 107294081 |
| chr9 | 110311479 | 110311599 |
| chr9 | 113328998 | 113329118 |
| chr9 | 116363086 | 116363206 |
| chr9 | 119419265 | 119419385 |
| chr9 | 122426349 | 122426469 |
| chr9 | 125426494 | 125426614 |
| chr9 | 128435066 | 128435186 |
| chr9 | 131452907 | 131453027 |
| chr9 | 134465334 | 134465454 |
| chr9 | 137475070 | 137475190 |
| chr9 | 137828589 | 137828709 |
| chr9 | 139258495 | 139258695 |
| chr9 | 139258703 | 139259052 |

|      |           |           |
|------|-----------|-----------|
| chr9 | 139259550 | 139259710 |
| chr9 | 139261194 | 139261354 |
| chr9 | 139261608 | 139261768 |
| chr9 | 139262044 | 139262516 |
| chr9 | 139264144 | 139264384 |
| chr9 | 139264697 | 139265203 |
| chr9 | 139265284 | 139265604 |
| chr9 | 139265724 | 139265964 |
| chr9 | 139266298 | 139266578 |
| chr9 | 139390522 | 139392010 |
| chr9 | 139393291 | 139393769 |
| chr9 | 139394995 | 139395307 |
| chr9 | 139396150 | 139396592 |
| chr9 | 139396711 | 139396951 |
| chr9 | 139397575 | 139397839 |
| chr9 | 139399124 | 139399556 |
| chr9 | 139399759 | 139400335 |
| chr9 | 139400926 | 139401142 |
| chr9 | 139401164 | 139401428 |
| chr9 | 139401702 | 139401942 |
| chr9 | 139402354 | 139402892 |
| chr9 | 139403266 | 139403578 |
| chr9 | 139404178 | 139404418 |
| chr9 | 139405048 | 139405312 |
| chr9 | 139405555 | 139405771 |
| chr9 | 139407421 | 139407637 |
| chr9 | 139407784 | 139408048 |
| chr9 | 139408901 | 139409213 |
| chr9 | 139409688 | 139409904 |
| chr9 | 139409931 | 139410171 |
| chr9 | 139410381 | 139410597 |
| chr9 | 139411672 | 139411888 |
| chr9 | 139412152 | 139412440 |
| chr9 | 139412534 | 139412798 |
| chr9 | 139413039 | 139413279 |
| chr9 | 139413835 | 139414075 |
| chr9 | 139417290 | 139417650 |
| chr9 | 139418167 | 139418431 |
| chr9 | 139438418 | 139438610 |
| chr9 | 139440123 | 139440291 |
| chr9 | 139793146 | 139793426 |
| chr9 | 139793784 | 139793904 |
| chr9 | 139794004 | 139794164 |

|       |           |           |
|-------|-----------|-----------|
| chr9  | 139794860 | 139795140 |
| chr9  | 139795443 | 139795563 |
| chr9  | 139796358 | 139796478 |
| chr9  | 139797875 | 139798105 |
| chr9  | 139802462 | 139802742 |
| chr9  | 139803897 | 139804017 |
| chr9  | 139804189 | 139804488 |
| chr9  | 139807597 | 139807717 |
| chr9  | 139808516 | 139808744 |
| chr9  | 139810534 | 139810654 |
| chr9  | 139810949 | 139811109 |
| chr9  | 139814666 | 139814986 |
| chr9  | 139814992 | 139815112 |
| chr9  | 139815438 | 139815718 |
| chr9  | 139816819 | 139816939 |
| chr9  | 139816949 | 139817104 |
| chr9  | 139817302 | 139817422 |
| chr9  | 139818257 | 139818497 |
| chr9  | 139819923 | 139820043 |
| chr9  | 139820123 | 139820363 |
| chr9  | 140477752 | 140477872 |
| chr10 | 158886    | 159006    |
| chr10 | 3165256   | 3165376   |
| chr10 | 6181649   | 6181769   |
| chr10 | 9192510   | 9192630   |
| chr10 | 12195802  | 12195922  |
| chr10 | 15199693  | 15199813  |
| chr10 | 18229506  | 18229626  |
| chr10 | 21240472  | 21240592  |
| chr10 | 24244496  | 24244616  |
| chr10 | 27253248  | 27253368  |
| chr10 | 30272971  | 30273091  |
| chr10 | 33281882  | 33282002  |
| chr10 | 36282950  | 36283070  |
| chr10 | 42827891  | 42828011  |
| chr10 | 43572601  | 43572951  |
| chr10 | 43595878  | 43596198  |
| chr10 | 43597773  | 43598093  |
| chr10 | 43600380  | 43600660  |
| chr10 | 43601801  | 43602041  |
| chr10 | 43604458  | 43604698  |
| chr10 | 43606643  | 43606923  |
| chr10 | 43607489  | 43607729  |

|       |          |          |
|-------|----------|----------|
| chr10 | 43608235 | 43608475 |
| chr10 | 43608943 | 43609183 |
| chr10 | 43609915 | 43610195 |
| chr10 | 43611965 | 43612245 |
| chr10 | 43613754 | 43613994 |
| chr10 | 43614965 | 43615205 |
| chr10 | 43615469 | 43615709 |
| chr10 | 43617328 | 43617528 |
| chr10 | 43619067 | 43619307 |
| chr10 | 43620280 | 43620480 |
| chr10 | 43621972 | 43622252 |
| chr10 | 43623498 | 43623778 |
| chr10 | 45829705 | 45829825 |
| chr10 | 49419948 | 49420068 |
| chr10 | 52499820 | 52499940 |
| chr10 | 55507127 | 55507247 |
| chr10 | 58687350 | 58687470 |
| chr10 | 61726810 | 61726930 |
| chr10 | 63661378 | 63661578 |
| chr10 | 63661904 | 63662184 |
| chr10 | 63669804 | 63669924 |
| chr10 | 63688667 | 63688787 |
| chr10 | 63699834 | 63700174 |
| chr10 | 63718418 | 63718538 |
| chr10 | 63727126 | 63727246 |
| chr10 | 63759844 | 63760084 |
| chr10 | 63800969 | 63801089 |
| chr10 | 63803411 | 63803531 |
| chr10 | 63809140 | 63809340 |
| chr10 | 63809466 | 63809586 |
| chr10 | 63810602 | 63810802 |
| chr10 | 63811906 | 63812026 |
| chr10 | 63816856 | 63817096 |
| chr10 | 63818947 | 63819107 |
| chr10 | 63829407 | 63829607 |
| chr10 | 63832218 | 63832338 |
| chr10 | 63832802 | 63832922 |
| chr10 | 63834792 | 63834912 |
| chr10 | 63835631 | 63835751 |
| chr10 | 63841069 | 63841189 |
| chr10 | 63845419 | 63845699 |
| chr10 | 63850604 | 63852804 |
| chr10 | 64745529 | 64745649 |

|       |          |          |
|-------|----------|----------|
| chr10 | 67759898 | 67760018 |
| chr10 | 70800563 | 70800683 |
| chr10 | 73819941 | 73820061 |
| chr10 | 76821038 | 76821158 |
| chr10 | 79825953 | 79826073 |
| chr10 | 82857917 | 82858037 |
| chr10 | 83757138 | 83757258 |
| chr10 | 85889445 | 85889565 |
| chr10 | 89175576 | 89175696 |
| chr10 | 89624185 | 89624345 |
| chr10 | 89653625 | 89653923 |
| chr10 | 89657093 | 89657213 |
| chr10 | 89674060 | 89674180 |
| chr10 | 89675529 | 89675649 |
| chr10 | 89682772 | 89682892 |
| chr10 | 89684041 | 89684201 |
| chr10 | 89685211 | 89685371 |
| chr10 | 89686353 | 89686581 |
| chr10 | 89689260 | 89689380 |
| chr10 | 89690744 | 89690904 |
| chr10 | 89692768 | 89693008 |
| chr10 | 89700628 | 89700748 |
| chr10 | 89705368 | 89705488 |
| chr10 | 89707204 | 89707324 |
| chr10 | 89711825 | 89712065 |
| chr10 | 89716046 | 89716166 |
| chr10 | 89717552 | 89717832 |
| chr10 | 89719386 | 89719506 |
| chr10 | 89720642 | 89720966 |
| chr10 | 89723267 | 89723495 |
| chr10 | 89724996 | 89725276 |
| chr10 | 92195768 | 92195888 |
| chr10 | 95202272 | 95202392 |
| chr10 | 95790786 | 95792026 |
| chr10 | 95848832 | 95849152 |
| chr10 | 95891913 | 95892233 |
| chr10 | 95930914 | 95931274 |
| chr10 | 95986995 | 95987275 |
| chr10 | 95993799 | 95994079 |
| chr10 | 95995654 | 95995894 |
| chr10 | 96005680 | 96006400 |
| chr10 | 96012043 | 96012283 |
| chr10 | 96013885 | 96014125 |

|       |           |           |
|-------|-----------|-----------|
| chr10 | 96014587  | 96014867  |
| chr10 | 96018497  | 96018958  |
| chr10 | 96022229  | 96022509  |
| chr10 | 96025334  | 96025772  |
| chr10 | 96028619  | 96028859  |
| chr10 | 96030180  | 96030420  |
| chr10 | 96033257  | 96033537  |
| chr10 | 96039483  | 96039723  |
| chr10 | 96043487  | 96043727  |
| chr10 | 96044543  | 96044783  |
| chr10 | 96053210  | 96053450  |
| chr10 | 96058120  | 96058440  |
| chr10 | 96064180  | 96064460  |
| chr10 | 96066154  | 96066474  |
| chr10 | 96068276  | 96068516  |
| chr10 | 96072954  | 96073194  |
| chr10 | 96076288  | 96076528  |
| chr10 | 96081596  | 96081876  |
| chr10 | 96084094  | 96084334  |
| chr10 | 96084622  | 96084862  |
| chr10 | 96087660  | 96087820  |
| chr10 | 98205359  | 98205479  |
| chr10 | 101213220 | 101213340 |
| chr10 | 104149753 | 104149873 |
| chr10 | 104150058 | 104150178 |
| chr10 | 104150938 | 104151058 |
| chr10 | 104152724 | 104152844 |
| chr10 | 104155626 | 104155826 |
| chr10 | 104155950 | 104156305 |
| chr10 | 104156322 | 104156970 |
| chr10 | 104157011 | 104157211 |
| chr10 | 104157242 | 104157482 |
| chr10 | 104157650 | 104157889 |
| chr10 | 104157911 | 104158330 |
| chr10 | 104158438 | 104158678 |
| chr10 | 104159029 | 104159269 |
| chr10 | 104159284 | 104159524 |
| chr10 | 104159635 | 104159755 |
| chr10 | 104159793 | 104159993 |
| chr10 | 104160021 | 104160261 |
| chr10 | 104160356 | 104160636 |
| chr10 | 104160654 | 104160854 |
| chr10 | 104160892 | 104161132 |

|       |           |           |
|-------|-----------|-----------|
| chr10 | 104161160 | 104161320 |
| chr10 | 104161447 | 104161727 |
| chr10 | 104161760 | 104162190 |
| chr10 | 104162709 | 104162829 |
| chr10 | 104164149 | 104164269 |
| chr10 | 104170143 | 104170263 |
| chr10 | 104170780 | 104170900 |
| chr10 | 104239040 | 104239160 |
| chr10 | 106022728 | 106022848 |
| chr10 | 106039124 | 106039244 |
| chr10 | 107252402 | 107252522 |
| chr10 | 110261366 | 110261486 |
| chr10 | 113267565 | 113267685 |
| chr10 | 116292501 | 116292621 |
| chr10 | 117612187 | 117612307 |
| chr10 | 119295869 | 119295989 |
| chr10 | 122301978 | 122302098 |
| chr10 | 125327169 | 125327289 |
| chr10 | 128332951 | 128333071 |
| chr10 | 131346404 | 131346524 |
| chr10 | 134442972 | 134443092 |
| chr11 | 203728    | 203848    |
| chr11 | 526377    | 526497    |
| chr11 | 528514    | 528634    |
| chr11 | 529906    | 530026    |
| chr11 | 531163    | 531283    |
| chr11 | 531443    | 531563    |
| chr11 | 532595    | 532795    |
| chr11 | 532976    | 533096    |
| chr11 | 533246    | 533406    |
| chr11 | 533412    | 533652    |
| chr11 | 533714    | 533994    |
| chr11 | 534166    | 534366    |
| chr11 | 538471    | 538591    |
| chr11 | 538879    | 539093    |
| chr11 | 539689    | 539809    |
| chr11 | 540097    | 540217    |
| chr11 | 544036    | 544156    |
| chr11 | 3204945   | 3205065   |
| chr11 | 6217092   | 6217212   |
| chr11 | 9230394   | 9230514   |
| chr11 | 10819315  | 10819475  |
| chr11 | 10820479  | 10820719  |



|       |          |          |
|-------|----------|----------|
| chr11 | 10820745 | 10820985 |
| chr11 | 10821080 | 10821320 |
| chr11 | 10821625 | 10821905 |
| chr11 | 10821966 | 10822206 |
| chr11 | 10822229 | 10822429 |
| chr11 | 10822451 | 10822691 |
| chr11 | 10823164 | 10823364 |
| chr11 | 10823535 | 10824031 |
| chr11 | 10824525 | 10824899 |
| chr11 | 10824981 | 10825181 |
| chr11 | 10825401 | 10826019 |
| chr11 | 10826410 | 10826610 |
| chr11 | 10827403 | 10827643 |
| chr11 | 10828319 | 10828479 |
| chr11 | 10828741 | 10828901 |
| chr11 | 12232056 | 12232176 |
| chr11 | 15232638 | 15232758 |
| chr11 | 17408569 | 17408689 |
| chr11 | 18235352 | 18235472 |
| chr11 | 21251140 | 21251260 |
| chr11 | 24267162 | 24267282 |
| chr11 | 27334949 | 27335069 |
| chr11 | 30342482 | 30342602 |
| chr11 | 33362806 | 33362926 |
| chr11 | 36376543 | 36376663 |
| chr11 | 36608094 | 36608214 |
| chr11 | 36608432 | 36608594 |
| chr11 | 36612029 | 36612149 |
| chr11 | 36613044 | 36613164 |
| chr11 | 36613746 | 36613866 |
| chr11 | 36614126 | 36615726 |
| chr11 | 36616806 | 36616926 |
| chr11 | 36618184 | 36618540 |
| chr11 | 36618614 | 36618734 |
| chr11 | 36620031 | 36620151 |
| chr11 | 36621534 | 36621654 |
| chr11 | 36622142 | 36622262 |
| chr11 | 36622410 | 36622530 |
| chr11 | 36625543 | 36625663 |
| chr11 | 39436638 | 39436758 |
| chr11 | 42443839 | 42443959 |
| chr11 | 45458807 | 45458927 |
| chr11 | 48548489 | 48548609 |

|       |          |          |
|-------|----------|----------|
| chr11 | 55091208 | 55091328 |
| chr11 | 58113681 | 58113801 |
| chr11 | 58978182 | 58980342 |
| chr11 | 60878601 | 60878721 |
| chr11 | 61067549 | 61067749 |
| chr11 | 61068222 | 61068462 |
| chr11 | 61069659 | 61069899 |
| chr11 | 61069998 | 61070278 |
| chr11 | 61070452 | 61070692 |
| chr11 | 61071281 | 61071561 |
| chr11 | 61076401 | 61076601 |
| chr11 | 61077209 | 61077489 |
| chr11 | 61077708 | 61077948 |
| chr11 | 61079191 | 61079608 |
| chr11 | 61080954 | 61081194 |
| chr11 | 61081267 | 61082008 |
| chr11 | 61083690 | 61084101 |
| chr11 | 61088997 | 61089237 |
| chr11 | 61089705 | 61089945 |
| chr11 | 61090424 | 61090624 |
| chr11 | 61091389 | 61091669 |
| chr11 | 61093031 | 61093231 |
| chr11 | 61094187 | 61094427 |
| chr11 | 61096805 | 61097085 |
| chr11 | 61097367 | 61097607 |
| chr11 | 61098948 | 61099228 |
| chr11 | 61100309 | 61100509 |
| chr11 | 61126798 | 61126918 |
| chr11 | 62559866 | 62560222 |
| chr11 | 62561680 | 62561960 |
| chr11 | 62562362 | 62562522 |
| chr11 | 62563313 | 62563473 |
| chr11 | 62563495 | 62563695 |
| chr11 | 62563707 | 62563867 |
| chr11 | 62563885 | 62564085 |
| chr11 | 62564602 | 62564903 |
| chr11 | 62565928 | 62566128 |
| chr11 | 62567735 | 62568015 |
| chr11 | 62568519 | 62568719 |
| chr11 | 62568744 | 62568944 |
| chr11 | 62568988 | 62569148 |
| chr11 | 62569150 | 62569350 |
| chr11 | 62569365 | 62569565 |

|       |          |          |
|-------|----------|----------|
| chr11 | 62569590 | 62569790 |
| chr11 | 62570847 | 62571087 |
| chr11 | 62571216 | 62571496 |
| chr11 | 62571497 | 62571737 |
| chr11 | 62572714 | 62572914 |
| chr11 | 64156525 | 64156645 |
| chr11 | 67174537 | 67174657 |
| chr11 | 69455827 | 69469267 |
| chr11 | 70253329 | 70253449 |
| chr11 | 70318958 | 70319558 |
| chr11 | 70331403 | 70331643 |
| chr11 | 70331651 | 70333851 |
| chr11 | 70335362 | 70335522 |
| chr11 | 70336266 | 70336546 |
| chr11 | 70338385 | 70338625 |
| chr11 | 70341856 | 70342056 |
| chr11 | 70343003 | 70343203 |
| chr11 | 70346606 | 70346958 |
| chr11 | 70347957 | 70348117 |
| chr11 | 70348250 | 70348450 |
| chr11 | 70348848 | 70349088 |
| chr11 | 70505874 | 70506114 |
| chr11 | 70507646 | 70507926 |
| chr11 | 70544733 | 70544933 |
| chr11 | 70644478 | 70644718 |
| chr11 | 70653051 | 70653331 |
| chr11 | 70666447 | 70666807 |
| chr11 | 70672503 | 70672703 |
| chr11 | 70719049 | 70719289 |
| chr11 | 70742540 | 70742740 |
| chr11 | 70757027 | 70757324 |
| chr11 | 70779175 | 70779295 |
| chr11 | 70788689 | 70789045 |
| chr11 | 70789098 | 70789258 |
| chr11 | 70789950 | 70790150 |
| chr11 | 70798788 | 70799028 |
| chr11 | 70803410 | 70803690 |
| chr11 | 70805518 | 70805798 |
| chr11 | 70820920 | 70821160 |
| chr11 | 70824274 | 70824474 |
| chr11 | 70829856 | 70830096 |
| chr11 | 70858148 | 70858388 |
| chr11 | 73276840 | 73276960 |

|       |          |          |
|-------|----------|----------|
| chr11 | 76139786 | 76139906 |
| chr11 | 76157917 | 76158117 |
| chr11 | 76161329 | 76161449 |
| chr11 | 76162851 | 76163051 |
| chr11 | 76163091 | 76163211 |
| chr11 | 76164296 | 76164496 |
| chr11 | 76165733 | 76165893 |
| chr11 | 76169174 | 76169454 |
| chr11 | 76170912 | 76171192 |
| chr11 | 76174854 | 76175134 |
| chr11 | 76183585 | 76183984 |
| chr11 | 76207245 | 76207525 |
| chr11 | 76224364 | 76224644 |
| chr11 | 76227130 | 76227410 |
| chr11 | 76234146 | 76234386 |
| chr11 | 76236160 | 76236280 |
| chr11 | 76237452 | 76237732 |
| chr11 | 76239290 | 76239530 |
| chr11 | 76246880 | 76247160 |
| chr11 | 76248776 | 76249056 |
| chr11 | 76250583 | 76250743 |
| chr11 | 76253191 | 76253431 |
| chr11 | 76255284 | 76255884 |
| chr11 | 76256810 | 76257370 |
| chr11 | 76260972 | 76261212 |
| chr11 | 76313721 | 76313841 |
| chr11 | 79322425 | 79322545 |
| chr11 | 82324005 | 82324125 |
| chr11 | 85436639 | 85436759 |
| chr11 | 88445210 | 88445330 |
| chr11 | 91448217 | 91448337 |
| chr11 | 92085264 | 92088584 |
| chr11 | 92219170 | 92219290 |
| chr11 | 92225137 | 92225257 |
| chr11 | 92229937 | 92230057 |
| chr11 | 92234472 | 92234592 |
| chr11 | 92244091 | 92244211 |
| chr11 | 92257796 | 92258116 |
| chr11 | 92259495 | 92259615 |
| chr11 | 92272589 | 92272709 |
| chr11 | 92289673 | 92289793 |
| chr11 | 92292534 | 92292774 |
| chr11 | 92301589 | 92301709 |

|       |          |          |
|-------|----------|----------|
| chr11 | 92325324 | 92325444 |
| chr11 | 92335100 | 92335220 |
| chr11 | 92340902 | 92341022 |
| chr11 | 92353581 | 92353701 |
| chr11 | 92416841 | 92416961 |
| chr11 | 92430500 | 92430660 |
| chr11 | 92495018 | 92495338 |
| chr11 | 92498029 | 92498269 |
| chr11 | 92507156 | 92507396 |
| chr11 | 92523106 | 92523386 |
| chr11 | 92525917 | 92526157 |
| chr11 | 92530998 | 92535078 |
| chr11 | 92538276 | 92538556 |
| chr11 | 92539484 | 92539724 |
| chr11 | 92543005 | 92543245 |
| chr11 | 92564782 | 92565182 |
| chr11 | 92568022 | 92568262 |
| chr11 | 92569680 | 92569920 |
| chr11 | 92570780 | 92571020 |
| chr11 | 92573686 | 92573966 |
| chr11 | 92577098 | 92577898 |
| chr11 | 92590326 | 92590566 |
| chr11 | 92592289 | 92592529 |
| chr11 | 92599900 | 92600380 |
| chr11 | 92613853 | 92614093 |
| chr11 | 92615891 | 92616571 |
| chr11 | 92620122 | 92620322 |
| chr11 | 92622304 | 92622464 |
| chr11 | 92622939 | 92623139 |
| chr11 | 92623647 | 92624287 |
| chr11 | 94153238 | 94153398 |
| chr11 | 94168931 | 94169131 |
| chr11 | 94170291 | 94170451 |
| chr11 | 94178917 | 94179117 |
| chr11 | 94180374 | 94180614 |
| chr11 | 94189372 | 94189572 |
| chr11 | 94192520 | 94192800 |
| chr11 | 94194031 | 94194271 |
| chr11 | 94197221 | 94197461 |
| chr11 | 94200918 | 94201118 |
| chr11 | 94203582 | 94203862 |
| chr11 | 94204712 | 94204952 |
| chr11 | 94208681 | 94208881 |

|       |           |           |
|-------|-----------|-----------|
| chr11 | 94209391  | 94209631  |
| chr11 | 94211831  | 94212111  |
| chr11 | 94212783  | 94212983  |
| chr11 | 94219029  | 94219309  |
| chr11 | 94223944  | 94224184  |
| chr11 | 94225741  | 94226057  |
| chr11 | 94479301  | 94479421  |
| chr11 | 97494247  | 97494367  |
| chr11 | 100509469 | 100509589 |
| chr11 | 101981559 | 101981919 |
| chr11 | 101984859 | 101985139 |
| chr11 | 102033124 | 102033364 |
| chr11 | 102056688 | 102056928 |
| chr11 | 102076600 | 102076840 |
| chr11 | 102080191 | 102080351 |
| chr11 | 102094297 | 102094537 |
| chr11 | 102098135 | 102098375 |
| chr11 | 102100411 | 102100691 |
| chr11 | 102188780 | 102188934 |
| chr11 | 102190108 | 102190228 |
| chr11 | 102195226 | 102196106 |
| chr11 | 102196146 | 102196346 |
| chr11 | 102196376 | 102196517 |
| chr11 | 102197400 | 102197640 |
| chr11 | 102198470 | 102198590 |
| chr11 | 102198741 | 102198901 |
| chr11 | 102199571 | 102199731 |
| chr11 | 102199983 | 102200219 |
| chr11 | 102201710 | 102201990 |
| chr11 | 102202790 | 102202910 |
| chr11 | 102204943 | 102205063 |
| chr11 | 102206683 | 102206963 |
| chr11 | 102207431 | 102207591 |
| chr11 | 102207596 | 102207910 |
| chr11 | 102209676 | 102209796 |
| chr11 | 102211360 | 102211480 |
| chr11 | 102212819 | 102212939 |
| chr11 | 102213984 | 102214214 |
| chr11 | 102215342 | 102215462 |
| chr11 | 102219341 | 102219541 |
| chr11 | 102220572 | 102221492 |
| chr11 | 102221524 | 102221724 |
| chr11 | 102231664 | 102231784 |

|       |           |           |
|-------|-----------|-----------|
| chr11 | 102231861 | 102231981 |
| chr11 | 102233585 | 102233745 |
| chr11 | 102234342 | 102234502 |
| chr11 | 102235080 | 102235200 |
| chr11 | 102237757 | 102237877 |
| chr11 | 102238092 | 102238212 |
| chr11 | 102238332 | 102238452 |
| chr11 | 102239017 | 102239297 |
| chr11 | 102247615 | 102247735 |
| chr11 | 102248213 | 102248493 |
| chr11 | 102248528 | 102248957 |
| chr11 | 102253609 | 102253729 |
| chr11 | 103512149 | 103512269 |
| chr11 | 106517823 | 106517943 |
| chr11 | 108098291 | 108098678 |
| chr11 | 108099837 | 108100117 |
| chr11 | 108106338 | 108106618 |
| chr11 | 108114659 | 108114939 |
| chr11 | 108115493 | 108115773 |
| chr11 | 108117632 | 108117912 |
| chr11 | 108119617 | 108119897 |
| chr11 | 108121413 | 108121813 |
| chr11 | 108122540 | 108122780 |
| chr11 | 108123491 | 108123691 |
| chr11 | 108124513 | 108124793 |
| chr11 | 108126907 | 108127147 |
| chr11 | 108128118 | 108128358 |
| chr11 | 108129657 | 108129857 |
| chr11 | 108137843 | 108138123 |
| chr11 | 108139116 | 108139356 |
| chr11 | 108141731 | 108142195 |
| chr11 | 108143196 | 108143633 |
| chr11 | 108150194 | 108150434 |
| chr11 | 108151668 | 108151948 |
| chr11 | 108153381 | 108153661 |
| chr11 | 108154936 | 108155216 |
| chr11 | 108158295 | 108158535 |
| chr11 | 108159646 | 108159886 |
| chr11 | 108160308 | 108160548 |
| chr11 | 108163292 | 108163572 |
| chr11 | 108164019 | 108164299 |
| chr11 | 108165599 | 108165839 |
| chr11 | 108167961 | 108168161 |

|       |           |           |
|-------|-----------|-----------|
| chr11 | 108170386 | 108170666 |
| chr11 | 108172305 | 108172585 |
| chr11 | 108173527 | 108173807 |
| chr11 | 108175350 | 108175630 |
| chr11 | 108178567 | 108178767 |
| chr11 | 108180824 | 108181104 |
| chr11 | 108183081 | 108183281 |
| chr11 | 108186493 | 108186908 |
| chr11 | 108188033 | 108188313 |
| chr11 | 108190612 | 108190852 |
| chr11 | 108191967 | 108192207 |
| chr11 | 108196013 | 108196293 |
| chr11 | 108196728 | 108197008 |
| chr11 | 108198308 | 108198548 |
| chr11 | 108199736 | 108199976 |
| chr11 | 108200924 | 108201164 |
| chr11 | 108202089 | 108202329 |
| chr11 | 108202544 | 108202824 |
| chr11 | 108203437 | 108203677 |
| chr11 | 108204553 | 108204753 |
| chr11 | 108205625 | 108205905 |
| chr11 | 108206509 | 108206749 |
| chr11 | 108213883 | 108214163 |
| chr11 | 108216412 | 108216692 |
| chr11 | 108217948 | 108218148 |
| chr11 | 108224429 | 108224669 |
| chr11 | 108225469 | 108225669 |
| chr11 | 108235756 | 108235996 |
| chr11 | 108236023 | 108236263 |
| chr11 | 109575046 | 109575166 |
| chr11 | 112580517 | 112580637 |
| chr11 | 115618027 | 115618147 |
| chr11 | 118307223 | 118307663 |
| chr11 | 118309687 | 118309887 |
| chr11 | 118317877 | 118317997 |
| chr11 | 118318118 | 118318238 |
| chr11 | 118318290 | 118318450 |
| chr11 | 118320492 | 118320612 |
| chr11 | 118339444 | 118339604 |
| chr11 | 118341588 | 118341708 |
| chr11 | 118342363 | 118345043 |
| chr11 | 118347468 | 118347748 |
| chr11 | 118348679 | 118348919 |



|       |           |           |
|-------|-----------|-----------|
| chr11 | 118349278 | 118349398 |
| chr11 | 118350840 | 118351000 |
| chr11 | 118351024 | 118351144 |
| chr11 | 118352418 | 118352818 |
| chr11 | 118353093 | 118353253 |
| chr11 | 118354843 | 118355083 |
| chr11 | 118355533 | 118355733 |
| chr11 | 118359100 | 118359220 |
| chr11 | 118359281 | 118359521 |
| chr11 | 118360454 | 118360654 |
| chr11 | 118360783 | 118361023 |
| chr11 | 118361851 | 118362091 |
| chr11 | 118362410 | 118362690 |
| chr11 | 118362808 | 118362928 |
| chr11 | 118363396 | 118363516 |
| chr11 | 118363718 | 118363998 |
| chr11 | 118364957 | 118365157 |
| chr11 | 118365202 | 118365322 |
| chr11 | 118365365 | 118365525 |
| chr11 | 118366371 | 118366651 |
| chr11 | 118366928 | 118367128 |
| chr11 | 118368599 | 118368839 |
| chr11 | 118369043 | 118369283 |
| chr11 | 118369976 | 118370176 |
| chr11 | 118370508 | 118370668 |
| chr11 | 118371641 | 118371921 |
| chr11 | 118372339 | 118372619 |
| chr11 | 118373096 | 118377376 |
| chr11 | 118377462 | 118377582 |
| chr11 | 118378183 | 118378383 |
| chr11 | 118379802 | 118379962 |
| chr11 | 118380607 | 118380887 |
| chr11 | 118381008 | 118381128 |
| chr11 | 118382622 | 118382855 |
| chr11 | 118390279 | 118390559 |
| chr11 | 118390625 | 118390825 |
| chr11 | 118391458 | 118391658 |
| chr11 | 118391947 | 118392187 |
| chr11 | 118392609 | 118392889 |
| chr11 | 118618987 | 118619107 |
| chr11 | 119077084 | 119077364 |
| chr11 | 119078932 | 119079052 |
| chr11 | 119085722 | 119085842 |

|       |           |           |
|-------|-----------|-----------|
| chr11 | 119086568 | 119086688 |
| chr11 | 119088822 | 119088942 |
| chr11 | 119096731 | 119096851 |
| chr11 | 119099767 | 119099887 |
| chr11 | 119103141 | 119103421 |
| chr11 | 119105631 | 119105751 |
| chr11 | 119107678 | 119107798 |
| chr11 | 119142397 | 119142637 |
| chr11 | 119142736 | 119142856 |
| chr11 | 119144535 | 119144775 |
| chr11 | 119145213 | 119145333 |
| chr11 | 119145482 | 119145722 |
| chr11 | 119146655 | 119146895 |
| chr11 | 119147113 | 119147233 |
| chr11 | 119148410 | 119148610 |
| chr11 | 119148821 | 119149061 |
| chr11 | 119149201 | 119149441 |
| chr11 | 119155624 | 119155864 |
| chr11 | 119155887 | 119156287 |
| chr11 | 119158508 | 119158708 |
| chr11 | 119165986 | 119166106 |
| chr11 | 119167585 | 119167785 |
| chr11 | 119168042 | 119168242 |
| chr11 | 119169018 | 119169298 |
| chr11 | 119170187 | 119170507 |
| chr11 | 121628947 | 121629067 |
| chr11 | 122713749 | 122713869 |
| chr11 | 124635084 | 124635204 |
| chr11 | 127636462 | 127636582 |
| chr11 | 130637827 | 130637947 |
| chr11 | 133656831 | 133656951 |
| chr12 | 197781    | 197901    |
| chr12 | 394604    | 394844    |
| chr12 | 395270    | 395430    |
| chr12 | 401909    | 402349    |
| chr12 | 404728    | 404968    |
| chr12 | 406166    | 406406    |
| chr12 | 416063    | 416303    |
| chr12 | 416615    | 417175    |
| chr12 | 418909    | 419189    |
| chr12 | 420000    | 420280    |
| chr12 | 422170    | 422410    |
| chr12 | 427269    | 427629    |

|       |         |         |
|-------|---------|---------|
| chr12 | 430117  | 430317  |
| chr12 | 431537  | 431777  |
| chr12 | 432189  | 432429  |
| chr12 | 432716  | 432996  |
| chr12 | 437957  | 438237  |
| chr12 | 440944  | 441144  |
| chr12 | 442593  | 442873  |
| chr12 | 443357  | 443637  |
| chr12 | 459745  | 459985  |
| chr12 | 461330  | 461530  |
| chr12 | 463200  | 463440  |
| chr12 | 464269  | 464469  |
| chr12 | 465550  | 465750  |
| chr12 | 472075  | 472315  |
| chr12 | 475044  | 475324  |
| chr12 | 493137  | 493377  |
| chr12 | 495021  | 495181  |
| chr12 | 496326  | 496526  |
| chr12 | 497352  | 497552  |
| chr12 | 498034  | 498314  |
| chr12 | 998304  | 998424  |
| chr12 | 3200904 | 3201024 |
| chr12 | 4383163 | 4383443 |
| chr12 | 4385158 | 4385398 |
| chr12 | 4387885 | 4388125 |
| chr12 | 4388210 | 4388330 |
| chr12 | 4388471 | 4388591 |
| chr12 | 4389097 | 4389217 |
| chr12 | 4392469 | 4392589 |
| chr12 | 4394816 | 4394936 |
| chr12 | 4397705 | 4397825 |
| chr12 | 4397961 | 4398201 |
| chr12 | 4399856 | 4399976 |
| chr12 | 4402756 | 4402876 |
| chr12 | 4403749 | 4403989 |
| chr12 | 4404315 | 4404435 |
| chr12 | 4405743 | 4405863 |
| chr12 | 4406220 | 4406340 |
| chr12 | 4406775 | 4407159 |
| chr12 | 4408612 | 4408732 |
| chr12 | 4408980 | 4409220 |
| chr12 | 5168788 | 5168908 |
| chr12 | 5674693 | 5674813 |

|       |          |          |
|-------|----------|----------|
| chr12 | 6169137  | 6169257  |
| chr12 | 6202799  | 6202919  |
| chr12 | 6484640  | 6484840  |
| chr12 | 6484974  | 6485094  |
| chr12 | 6485600  | 6485720  |
| chr12 | 6488389  | 6488509  |
| chr12 | 6490123  | 6490243  |
| chr12 | 6490320  | 6490440  |
| chr12 | 6490548  | 6490668  |
| chr12 | 6490682  | 6490802  |
| chr12 | 6491856  | 6492096  |
| chr12 | 6492588  | 6492708  |
| chr12 | 6493472  | 6493672  |
| chr12 | 6493701  | 6493960  |
| chr12 | 6494130  | 6494588  |
| chr12 | 6495179  | 6495379  |
| chr12 | 6495461  | 6495661  |
| chr12 | 6496034  | 6496154  |
| chr12 | 6496913  | 6497113  |
| chr12 | 6497198  | 6497318  |
| chr12 | 6497517  | 6497717  |
| chr12 | 6497878  | 6498078  |
| chr12 | 6498594  | 6498714  |
| chr12 | 6499271  | 6499511  |
| chr12 | 6499824  | 6500104  |
| chr12 | 6554209  | 6554449  |
| chr12 | 6554535  | 6554775  |
| chr12 | 6559288  | 6559568  |
| chr12 | 6559651  | 6559851  |
| chr12 | 6560000  | 6560240  |
| chr12 | 6560375  | 6560615  |
| chr12 | 6653983  | 6654103  |
| chr12 | 7049938  | 7050058  |
| chr12 | 7600688  | 7600808  |
| chr12 | 8090778  | 8090898  |
| chr12 | 8687751  | 8687871  |
| chr12 | 9174895  | 9175015  |
| chr12 | 9212086  | 9212206  |
| chr12 | 9739824  | 9739944  |
| chr12 | 10251062 | 10251182 |
| chr12 | 10743855 | 10743975 |
| chr12 | 11802997 | 11803157 |
| chr12 | 11905328 | 11905568 |

|       |          |          |
|-------|----------|----------|
| chr12 | 11992015 | 11992295 |
| chr12 | 12006307 | 12006547 |
| chr12 | 12022330 | 12022930 |
| chr12 | 12037309 | 12037589 |
| chr12 | 12038789 | 12039029 |
| chr12 | 12043807 | 12044047 |
| chr12 | 12161480 | 12161600 |
| chr12 | 12223782 | 12223902 |
| chr12 | 14538225 | 14538425 |
| chr12 | 14576824 | 14578424 |
| chr12 | 14587213 | 14587413 |
| chr12 | 14588972 | 14589252 |
| chr12 | 14591012 | 14591252 |
| chr12 | 14599854 | 14600054 |
| chr12 | 14609431 | 14609631 |
| chr12 | 14610084 | 14610284 |
| chr12 | 14613407 | 14614087 |
| chr12 | 14619391 | 14619591 |
| chr12 | 14628762 | 14628962 |
| chr12 | 14631188 | 14631468 |
| chr12 | 14633908 | 14634188 |
| chr12 | 14649100 | 14649340 |
| chr12 | 14650577 | 14651017 |
| chr12 | 15227282 | 15227402 |
| chr12 | 18233007 | 18233127 |
| chr12 | 18434994 | 18435714 |
| chr12 | 18439721 | 18439921 |
| chr12 | 18443727 | 18444007 |
| chr12 | 18446771 | 18447011 |
| chr12 | 18466826 | 18467066 |
| chr12 | 18473830 | 18474030 |
| chr12 | 18477900 | 18478100 |
| chr12 | 18491300 | 18491540 |
| chr12 | 18496197 | 18496357 |
| chr12 | 18499552 | 18499792 |
| chr12 | 18515640 | 18515880 |
| chr12 | 18524059 | 18524299 |
| chr12 | 18534636 | 18534876 |
| chr12 | 18544000 | 18544240 |
| chr12 | 18552566 | 18552806 |
| chr12 | 18573821 | 18574021 |
| chr12 | 18576825 | 18577025 |
| chr12 | 18641352 | 18641592 |

|       |          |          |
|-------|----------|----------|
| chr12 | 18644318 | 18644558 |
| chr12 | 18648941 | 18649141 |
| chr12 | 18650497 | 18650737 |
| chr12 | 18656162 | 18656402 |
| chr12 | 18658170 | 18658450 |
| chr12 | 18691027 | 18691307 |
| chr12 | 18699191 | 18699431 |
| chr12 | 18715611 | 18715851 |
| chr12 | 18716251 | 18716491 |
| chr12 | 18719816 | 18720056 |
| chr12 | 18747365 | 18747565 |
| chr12 | 18762415 | 18762615 |
| chr12 | 18793305 | 18793545 |
| chr12 | 18800745 | 18801025 |
| chr12 | 21274430 | 21274550 |
| chr12 | 24284669 | 24284789 |
| chr12 | 25362686 | 25362886 |
| chr12 | 25368334 | 25368534 |
| chr12 | 25369642 | 25369762 |
| chr12 | 25371401 | 25371521 |
| chr12 | 25375738 | 25375858 |
| chr12 | 25377965 | 25378085 |
| chr12 | 25378507 | 25378747 |
| chr12 | 25380116 | 25380396 |
| chr12 | 25382125 | 25382245 |
| chr12 | 25382481 | 25382601 |
| chr12 | 25383752 | 25383872 |
| chr12 | 25385381 | 25385501 |
| chr12 | 25388049 | 25388249 |
| chr12 | 25391003 | 25391123 |
| chr12 | 25391178 | 25391298 |
| chr12 | 25391395 | 25391515 |
| chr12 | 25392232 | 25392352 |
| chr12 | 25392382 | 25392502 |
| chr12 | 25393804 | 25393924 |
| chr12 | 25398162 | 25398362 |
| chr12 | 27285846 | 27285966 |
| chr12 | 30289890 | 30290010 |
| chr12 | 31184292 | 31184412 |
| chr12 | 31195212 | 31195332 |
| chr12 | 31225650 | 31225770 |
| chr12 | 31231259 | 31231539 |
| chr12 | 31236730 | 31237010 |

|       |          |          |
|-------|----------|----------|
| chr12 | 31237459 | 31237659 |
| chr12 | 31237841 | 31238121 |
| chr12 | 31238869 | 31239252 |
| chr12 | 31240814 | 31240974 |
| chr12 | 31241911 | 31242151 |
| chr12 | 31242280 | 31242480 |
| chr12 | 31242803 | 31243043 |
| chr12 | 31244588 | 31244868 |
| chr12 | 31245722 | 31245882 |
| chr12 | 31246118 | 31246318 |
| chr12 | 31247465 | 31247822 |
| chr12 | 31249213 | 31249373 |
| chr12 | 31249504 | 31249978 |
| chr12 | 31250754 | 31250994 |
| chr12 | 31253504 | 31253704 |
| chr12 | 31253892 | 31254132 |
| chr12 | 31254701 | 31254981 |
| chr12 | 31255110 | 31255530 |
| chr12 | 31255811 | 31256011 |
| chr12 | 31256189 | 31256389 |
| chr12 | 31256447 | 31256993 |
| chr12 | 31292360 | 31292480 |
| chr12 | 33293847 | 33293967 |
| chr12 | 38475405 | 38475525 |
| chr12 | 40618888 | 40619128 |
| chr12 | 40619299 | 40619499 |
| chr12 | 40626030 | 40626230 |
| chr12 | 40629371 | 40629571 |
| chr12 | 40631717 | 40631957 |
| chr12 | 40634231 | 40634471 |
| chr12 | 40637297 | 40637537 |
| chr12 | 40643587 | 40643787 |
| chr12 | 40644984 | 40645224 |
| chr12 | 40645226 | 40645386 |
| chr12 | 40646664 | 40646864 |
| chr12 | 40650994 | 40651234 |
| chr12 | 40653223 | 40653463 |
| chr12 | 40657546 | 40657746 |
| chr12 | 40668336 | 40668576 |
| chr12 | 40668605 | 40668845 |
| chr12 | 40671633 | 40672117 |
| chr12 | 40677665 | 40677945 |
| chr12 | 40681106 | 40681386 |

|       |          |          |
|-------|----------|----------|
| chr12 | 40687305 | 40687505 |
| chr12 | 40688601 | 40688761 |
| chr12 | 40689217 | 40689457 |
| chr12 | 40692029 | 40692309 |
| chr12 | 40692864 | 40693104 |
| chr12 | 40694555 | 40694755 |
| chr12 | 40696537 | 40696737 |
| chr12 | 40697742 | 40697982 |
| chr12 | 40699537 | 40699817 |
| chr12 | 40702263 | 40702503 |
| chr12 | 40702851 | 40703091 |
| chr12 | 40704221 | 40704461 |
| chr12 | 40707754 | 40707994 |
| chr12 | 40708957 | 40709157 |
| chr12 | 40713743 | 40714023 |
| chr12 | 40714792 | 40715032 |
| chr12 | 40715789 | 40716029 |
| chr12 | 40716076 | 40716356 |
| chr12 | 40716914 | 40717154 |
| chr12 | 40722111 | 40722311 |
| chr12 | 40728723 | 40729003 |
| chr12 | 40734035 | 40734315 |
| chr12 | 40740499 | 40740779 |
| chr12 | 40742160 | 40742360 |
| chr12 | 40745297 | 40745577 |
| chr12 | 40748057 | 40748337 |
| chr12 | 40749872 | 40750032 |
| chr12 | 40753013 | 40753293 |
| chr12 | 40757159 | 40757399 |
| chr12 | 40758627 | 40758867 |
| chr12 | 40760763 | 40760923 |
| chr12 | 40761386 | 40761626 |
| chr12 | 41497798 | 41497918 |
| chr12 | 44508200 | 44508320 |
| chr12 | 46123565 | 46123765 |
| chr12 | 46123773 | 46123973 |
| chr12 | 46124948 | 46125148 |
| chr12 | 46134760 | 46134880 |
| chr12 | 46154998 | 46155118 |
| chr12 | 46175408 | 46175528 |
| chr12 | 46192296 | 46192416 |
| chr12 | 46200334 | 46200454 |
| chr12 | 46205147 | 46205387 |



|       |          |          |
|-------|----------|----------|
| chr12 | 46211441 | 46211681 |
| chr12 | 46215102 | 46215316 |
| chr12 | 46227589 | 46227709 |
| chr12 | 46230324 | 46230484 |
| chr12 | 46230508 | 46230788 |
| chr12 | 46231051 | 46231251 |
| chr12 | 46231265 | 46231505 |
| chr12 | 46231892 | 46232012 |
| chr12 | 46233055 | 46233335 |
| chr12 | 46238951 | 46239071 |
| chr12 | 46240579 | 46240779 |
| chr12 | 46242565 | 46242805 |
| chr12 | 46243320 | 46243600 |
| chr12 | 46243808 | 46246688 |
| chr12 | 46248739 | 46248859 |
| chr12 | 46254537 | 46254777 |
| chr12 | 46274797 | 46274917 |
| chr12 | 46275876 | 46275996 |
| chr12 | 46285511 | 46285936 |
| chr12 | 46287144 | 46287560 |
| chr12 | 46298033 | 46298233 |
| chr12 | 46298668 | 46298908 |
| chr12 | 47509175 | 47509295 |
| chr12 | 48317772 | 48317892 |
| chr12 | 48325783 | 48325903 |
| chr12 | 48343978 | 48344098 |
| chr12 | 48358219 | 48358339 |
| chr12 | 48359924 | 48360044 |
| chr12 | 48366389 | 48366509 |
| chr12 | 48367122 | 48367402 |
| chr12 | 48367852 | 48368132 |
| chr12 | 48368431 | 48368671 |
| chr12 | 48369083 | 48369403 |
| chr12 | 48369679 | 48369919 |
| chr12 | 48370243 | 48370403 |
| chr12 | 48370528 | 48370768 |
| chr12 | 48370831 | 48370991 |
| chr12 | 48371036 | 48371276 |
| chr12 | 48371329 | 48371489 |
| chr12 | 48371535 | 48371655 |
| chr12 | 48371726 | 48371966 |
| chr12 | 48372007 | 48372247 |
| chr12 | 48372320 | 48372600 |

|       |          |          |
|-------|----------|----------|
| chr12 | 48373240 | 48373400 |
| chr12 | 48373738 | 48373898 |
| chr12 | 48374270 | 48374804 |
| chr12 | 48375072 | 48375232 |
| chr12 | 48375505 | 48375665 |
| chr12 | 48375836 | 48375996 |
| chr12 | 48376218 | 48376458 |
| chr12 | 48376579 | 48376779 |
| chr12 | 48376817 | 48376977 |
| chr12 | 48377114 | 48377274 |
| chr12 | 48377412 | 48377572 |
| chr12 | 48377816 | 48377976 |
| chr12 | 48378275 | 48378435 |
| chr12 | 48378726 | 48378926 |
| chr12 | 48379263 | 48379423 |
| chr12 | 48379459 | 48379801 |
| chr12 | 48379971 | 48380292 |
| chr12 | 48380564 | 48380724 |
| chr12 | 48380809 | 48381153 |
| chr12 | 48381342 | 48381542 |
| chr12 | 48382957 | 48383117 |
| chr12 | 48383485 | 48383645 |
| chr12 | 48385516 | 48385636 |
| chr12 | 48386607 | 48386767 |
| chr12 | 48387182 | 48387342 |
| chr12 | 48387538 | 48387698 |
| chr12 | 48387723 | 48387883 |
| chr12 | 48388153 | 48388313 |
| chr12 | 48388984 | 48389144 |
| chr12 | 48389439 | 48389759 |
| chr12 | 48390269 | 48390469 |
| chr12 | 48390779 | 48390899 |
| chr12 | 48391217 | 48391417 |
| chr12 | 48391420 | 48391580 |
| chr12 | 48391600 | 48392047 |
| chr12 | 48392105 | 48392305 |
| chr12 | 48393684 | 48393924 |
| chr12 | 48397857 | 48398159 |
| chr12 | 48403169 | 48403289 |
| chr12 | 48410457 | 48410577 |
| chr12 | 48418496 | 48418616 |
| chr12 | 48444428 | 48444548 |
| chr12 | 48446245 | 48446365 |

|       |          |          |
|-------|----------|----------|
| chr12 | 49415508 | 49415708 |
| chr12 | 49415779 | 49415979 |
| chr12 | 49416019 | 49416179 |
| chr12 | 49416355 | 49416675 |
| chr12 | 49416883 | 49417003 |
| chr12 | 49417779 | 49417939 |
| chr12 | 49418305 | 49418780 |
| chr12 | 49419616 | 49419736 |
| chr12 | 49419954 | 49421114 |
| chr12 | 49421529 | 49421977 |
| chr12 | 49422033 | 49422153 |
| chr12 | 49422555 | 49423071 |
| chr12 | 49423141 | 49423301 |
| chr12 | 49424022 | 49424262 |
| chr12 | 49424327 | 49424865 |
| chr12 | 49424952 | 49427752 |
| chr12 | 49427845 | 49428085 |
| chr12 | 49428145 | 49428305 |
| chr12 | 49428306 | 49428506 |
| chr12 | 49428536 | 49428776 |
| chr12 | 49429995 | 49430115 |
| chr12 | 49430899 | 49432779 |
| chr12 | 49432952 | 49433448 |
| chr12 | 49433492 | 49435332 |
| chr12 | 49435382 | 49435542 |
| chr12 | 49435656 | 49435816 |
| chr12 | 49435852 | 49436132 |
| chr12 | 49436285 | 49436783 |
| chr12 | 49436813 | 49437013 |
| chr12 | 49437098 | 49437258 |
| chr12 | 49437371 | 49437835 |
| chr12 | 49437934 | 49438134 |
| chr12 | 49438145 | 49438345 |
| chr12 | 49438517 | 49438757 |
| chr12 | 49439431 | 49439567 |
| chr12 | 49439598 | 49440264 |
| chr12 | 49440342 | 49440622 |
| chr12 | 49441699 | 49441899 |
| chr12 | 49442396 | 49442596 |
| chr12 | 49442844 | 49443044 |
| chr12 | 49443458 | 49444578 |
| chr12 | 49444657 | 49446217 |
| chr12 | 49446299 | 49446539 |

|       |          |          |
|-------|----------|----------|
| chr12 | 49446656 | 49446896 |
| chr12 | 49446946 | 49447146 |
| chr12 | 49447201 | 49447481 |
| chr12 | 49447701 | 49447981 |
| chr12 | 49448044 | 49448244 |
| chr12 | 49448302 | 49448542 |
| chr12 | 49448625 | 49448865 |
| chr12 | 49449002 | 49449162 |
| chr12 | 50514418 | 50514538 |
| chr12 | 53514972 | 53515092 |
| chr12 | 54466034 | 54466154 |
| chr12 | 56474025 | 56474225 |
| chr12 | 56477470 | 56477750 |
| chr12 | 56478757 | 56479117 |
| chr12 | 56480257 | 56480497 |
| chr12 | 56481293 | 56481493 |
| chr12 | 56481517 | 56482015 |
| chr12 | 56482263 | 56482711 |
| chr12 | 56486467 | 56486667 |
| chr12 | 56486714 | 56486914 |
| chr12 | 56487111 | 56487351 |
| chr12 | 56487493 | 56487733 |
| chr12 | 56487827 | 56488027 |
| chr12 | 56488122 | 56488402 |
| chr12 | 56488987 | 56489147 |
| chr12 | 56489379 | 56489659 |
| chr12 | 56490226 | 56490466 |
| chr12 | 56490480 | 56490680 |
| chr12 | 56490801 | 56491041 |
| chr12 | 56491506 | 56491786 |
| chr12 | 56492221 | 56492421 |
| chr12 | 56492460 | 56492740 |
| chr12 | 56493380 | 56493580 |
| chr12 | 56493597 | 56493837 |
| chr12 | 56493893 | 56494093 |
| chr12 | 56494814 | 56495174 |
| chr12 | 56495246 | 56495855 |
| chr12 | 56630007 | 56630127 |
| chr12 | 58142253 | 58142453 |
| chr12 | 58142912 | 58143152 |
| chr12 | 58143181 | 58143341 |
| chr12 | 58144204 | 58144593 |
| chr12 | 58144649 | 58144929 |

|       |           |           |
|-------|-----------|-----------|
| chr12 | 58144937  | 58145177  |
| chr12 | 58145271  | 58145511  |
| chr12 | 59723217  | 59723337  |
| chr12 | 62745262  | 62745382  |
| chr12 | 65748972  | 65749092  |
| chr12 | 68751345  | 68751465  |
| chr12 | 71822626  | 71822746  |
| chr12 | 74843694  | 74843814  |
| chr12 | 77873194  | 77873314  |
| chr12 | 80888510  | 80888630  |
| chr12 | 83895380  | 83895500  |
| chr12 | 86965703  | 86965823  |
| chr12 | 90147374  | 90147494  |
| chr12 | 93165559  | 93165679  |
| chr12 | 96168345  | 96168465  |
| chr12 | 99173683  | 99173803  |
| chr12 | 102182121 | 102182241 |
| chr12 | 103772716 | 103772836 |
| chr12 | 105230659 | 105230779 |
| chr12 | 108233514 | 108233634 |
| chr12 | 109937473 | 109937593 |
| chr12 | 110719533 | 110719773 |
| chr12 | 110720317 | 110720658 |
| chr12 | 110729756 | 110729996 |
| chr12 | 110734352 | 110734592 |
| chr12 | 110760736 | 110760936 |
| chr12 | 110764137 | 110764337 |
| chr12 | 110765329 | 110765849 |
| chr12 | 110770345 | 110770545 |
| chr12 | 110770916 | 110771156 |
| chr12 | 110771762 | 110772002 |
| chr12 | 110777026 | 110777266 |
| chr12 | 110777296 | 110777536 |
| chr12 | 110778451 | 110778811 |
| chr12 | 110780002 | 110780282 |
| chr12 | 110781017 | 110781257 |
| chr12 | 110782633 | 110782833 |
| chr12 | 110783000 | 110783240 |
| chr12 | 110783744 | 110784300 |
| chr12 | 110784361 | 110784561 |
| chr12 | 110788003 | 110788203 |
| chr12 | 111235661 | 111235781 |
| chr12 | 113495994 | 113496258 |

|       |           |           |
|-------|-----------|-----------|
| chr12 | 113515221 | 113515917 |
| chr12 | 113530913 | 113531081 |
| chr12 | 113531292 | 113531556 |
| chr12 | 113531789 | 113531957 |
| chr12 | 113532540 | 113533059 |
| chr12 | 113533078 | 113533270 |
| chr12 | 113534511 | 113534751 |
| chr12 | 114238151 | 114238271 |
| chr12 | 117256638 | 117256758 |
| chr12 | 120257763 | 120257883 |
| chr12 | 123258496 | 123258616 |
| chr12 | 124809918 | 124810158 |
| chr12 | 124810700 | 124810940 |
| chr12 | 124811925 | 124812205 |
| chr12 | 124813543 | 124813743 |
| chr12 | 124815337 | 124815497 |
| chr12 | 124816798 | 124817078 |
| chr12 | 124817610 | 124817890 |
| chr12 | 124818946 | 124819186 |
| chr12 | 124819613 | 124819893 |
| chr12 | 124819963 | 124820243 |
| chr12 | 124821272 | 124821752 |
| chr12 | 124821756 | 124821956 |
| chr12 | 124824479 | 124824719 |
| chr12 | 124824725 | 124825054 |
| chr12 | 124825082 | 124825362 |
| chr12 | 124826354 | 124826634 |
| chr12 | 124827521 | 124827801 |
| chr12 | 124829119 | 124829519 |
| chr12 | 124831092 | 124831412 |
| chr12 | 124832313 | 124832513 |
| chr12 | 124832649 | 124832929 |
| chr12 | 124835067 | 124835347 |
| chr12 | 124838570 | 124838810 |
| chr12 | 124838955 | 124839195 |
| chr12 | 124839313 | 124839553 |
| chr12 | 124839927 | 124840167 |
| chr12 | 124841129 | 124841409 |
| chr12 | 124846617 | 124846897 |
| chr12 | 124848164 | 124848404 |
| chr12 | 124856541 | 124857181 |
| chr12 | 124858903 | 124859063 |
| chr12 | 124862716 | 124862996 |

|       |           |           |
|-------|-----------|-----------|
| chr12 | 124870221 | 124870501 |
| chr12 | 124873173 | 124873333 |
| chr12 | 124882595 | 124882795 |
| chr12 | 124884992 | 124885272 |
| chr12 | 124886843 | 124887003 |
| chr12 | 124887091 | 124887291 |
| chr12 | 124904451 | 124904651 |
| chr12 | 124906993 | 124907153 |
| chr12 | 124911116 | 124911396 |
| chr12 | 124914105 | 124914305 |
| chr12 | 124915106 | 124915386 |
| chr12 | 124922408 | 124922608 |
| chr12 | 124934306 | 124934466 |
| chr12 | 124941599 | 124941759 |
| chr12 | 124950655 | 124950895 |
| chr12 | 124957447 | 124957727 |
| chr12 | 124968090 | 124968370 |
| chr12 | 124970930 | 124971170 |
| chr12 | 124979624 | 124979864 |
| chr12 | 126265603 | 126265723 |
| chr12 | 129271399 | 129271519 |
| chr12 | 132022163 | 132022283 |
| chr12 | 132272665 | 132272785 |
| chr12 | 132445136 | 132446655 |
| chr12 | 132448011 | 132448251 |
| chr12 | 132464188 | 132464388 |
| chr12 | 132466014 | 132466214 |
| chr12 | 132466610 | 132467050 |
| chr12 | 132471045 | 132471365 |
| chr12 | 132472222 | 132472462 |
| chr12 | 132474438 | 132474718 |
| chr12 | 132475119 | 132475319 |
| chr12 | 132475896 | 132476056 |
| chr12 | 132476666 | 132476826 |
| chr12 | 132479347 | 132479587 |
| chr12 | 132489555 | 132489795 |
| chr12 | 132490631 | 132490871 |
| chr12 | 132491193 | 132491473 |
| chr12 | 132495990 | 132496230 |
| chr12 | 132497498 | 132497778 |
| chr12 | 132497981 | 132498261 |
| chr12 | 132498269 | 132498509 |
| chr12 | 132502052 | 132502292 |

|       |           |           |
|-------|-----------|-----------|
| chr12 | 132502697 | 132502977 |
| chr12 | 132504538 | 132504818 |
| chr12 | 132505513 | 132505753 |
| chr12 | 132505772 | 132505972 |
| chr12 | 132508263 | 132508543 |
| chr12 | 132510129 | 132510409 |
| chr12 | 132511928 | 132512128 |
| chr12 | 132512537 | 132512857 |
| chr12 | 132514226 | 132514466 |
| chr12 | 132514478 | 132514758 |
| chr12 | 132516475 | 132516715 |
| chr12 | 132522162 | 132522402 |
| chr12 | 132522429 | 132522709 |
| chr12 | 132527787 | 132528067 |
| chr12 | 132528131 | 132528331 |
| chr12 | 132528668 | 132528908 |
| chr12 | 132529157 | 132529561 |
| chr12 | 132529844 | 132530124 |
| chr12 | 132530218 | 132530498 |
| chr12 | 132534815 | 132535055 |
| chr12 | 132535091 | 132535251 |
| chr12 | 132537629 | 132537950 |
| chr12 | 132538062 | 132538222 |
| chr12 | 132539461 | 132539818 |
| chr12 | 132546641 | 132546881 |
| chr12 | 132546927 | 132547087 |
| chr12 | 132547137 | 132547337 |
| chr12 | 132549201 | 132549441 |
| chr12 | 132551296 | 132551536 |
| chr12 | 132551848 | 132552088 |
| chr12 | 132553972 | 132554252 |
| chr12 | 132560999 | 132561199 |
| chr12 | 132561921 | 132562241 |
| chr13 | 19273191  | 19273311  |
| chr13 | 22274382  | 22274502  |
| chr13 | 23732138  | 23732258  |
| chr13 | 25285751  | 25285871  |
| chr13 | 28293282  | 28293402  |
| chr13 | 28578129  | 28578369  |
| chr13 | 28588541  | 28588741  |
| chr13 | 28589243  | 28589443  |
| chr13 | 28589682  | 28589882  |
| chr13 | 28592540  | 28592780  |



|       |          |          |
|-------|----------|----------|
| chr13 | 28597430 | 28597670 |
| chr13 | 28598938 | 28599138 |
| chr13 | 28599445 | 28599645 |
| chr13 | 28601181 | 28601421 |
| chr13 | 28602269 | 28602469 |
| chr13 | 28607975 | 28608590 |
| chr13 | 28609580 | 28609860 |
| chr13 | 28610025 | 28610225 |
| chr13 | 28611273 | 28611473 |
| chr13 | 28622355 | 28622635 |
| chr13 | 28623477 | 28623717 |
| chr13 | 28623721 | 28623961 |
| chr13 | 28624175 | 28624415 |
| chr13 | 28626626 | 28626866 |
| chr13 | 28631441 | 28631641 |
| chr13 | 28635984 | 28636224 |
| chr13 | 28644568 | 28644808 |
| chr13 | 28674545 | 28674705 |
| chr13 | 28877284 | 28877524 |
| chr13 | 28880761 | 28880961 |
| chr13 | 28882921 | 28883121 |
| chr13 | 28885677 | 28885917 |
| chr13 | 28886082 | 28886282 |
| chr13 | 28891584 | 28891784 |
| chr13 | 28893515 | 28893715 |
| chr13 | 28895540 | 28895780 |
| chr13 | 28896347 | 28896703 |
| chr13 | 28896884 | 28897124 |
| chr13 | 28901542 | 28901742 |
| chr13 | 28903708 | 28903908 |
| chr13 | 28908113 | 28908313 |
| chr13 | 28913250 | 28913490 |
| chr13 | 28919534 | 28919734 |
| chr13 | 28931636 | 28931876 |
| chr13 | 28942657 | 28942857 |
| chr13 | 28958974 | 28959214 |
| chr13 | 28963926 | 28964246 |
| chr13 | 28971050 | 28971250 |
| chr13 | 28973137 | 28973297 |
| chr13 | 28979873 | 28980073 |
| chr13 | 29001255 | 29001495 |
| chr13 | 29001833 | 29002113 |
| chr13 | 29004145 | 29004345 |

|       |          |          |
|-------|----------|----------|
| chr13 | 29005219 | 29005499 |
| chr13 | 29007903 | 29008415 |
| chr13 | 29012299 | 29012539 |
| chr13 | 29041032 | 29041272 |
| chr13 | 29041605 | 29041805 |
| chr13 | 29068868 | 29069028 |
| chr13 | 31310912 | 31311032 |
| chr13 | 32890550 | 32890710 |
| chr13 | 32893197 | 32893477 |
| chr13 | 32899166 | 32899366 |
| chr13 | 32900182 | 32900478 |
| chr13 | 32900592 | 32900792 |
| chr13 | 32903524 | 32903684 |
| chr13 | 32905011 | 32905211 |
| chr13 | 32906406 | 32907526 |
| chr13 | 32910387 | 32915347 |
| chr13 | 32918642 | 32918842 |
| chr13 | 32920918 | 32921078 |
| chr13 | 32928991 | 32929431 |
| chr13 | 32930515 | 32930795 |
| chr13 | 32931832 | 32932112 |
| chr13 | 32936604 | 32936884 |
| chr13 | 32937312 | 32937672 |
| chr13 | 32944496 | 32944736 |
| chr13 | 32945044 | 32945284 |
| chr13 | 32949431 | 32949591 |
| chr13 | 32950747 | 32950987 |
| chr13 | 32953412 | 32953692 |
| chr13 | 32953828 | 32954332 |
| chr13 | 32968807 | 32969087 |
| chr13 | 32970078 | 32970278 |
| chr13 | 32970987 | 32971227 |
| chr13 | 32972282 | 32972922 |
| chr13 | 34318089 | 34318209 |
| chr13 | 37351696 | 37351816 |
| chr13 | 40385379 | 40385499 |
| chr13 | 43408467 | 43408587 |
| chr13 | 46413063 | 46413183 |
| chr13 | 47505109 | 47505229 |
| chr13 | 48877996 | 48878236 |
| chr13 | 48881358 | 48881598 |
| chr13 | 48916692 | 48916892 |
| chr13 | 48917612 | 48917732 |

|       |          |          |
|-------|----------|----------|
| chr13 | 48918114 | 48918234 |
| chr13 | 48919175 | 48919375 |
| chr13 | 48921879 | 48922079 |
| chr13 | 48923045 | 48923205 |
| chr13 | 48934107 | 48934307 |
| chr13 | 48936901 | 48937141 |
| chr13 | 48938988 | 48939148 |
| chr13 | 48941584 | 48941784 |
| chr13 | 48942621 | 48942781 |
| chr13 | 48943988 | 48944108 |
| chr13 | 48947484 | 48947684 |
| chr13 | 48951011 | 48951211 |
| chr13 | 48953677 | 48953837 |
| chr13 | 48954104 | 48954418 |
| chr13 | 48955340 | 48955620 |
| chr13 | 48964687 | 48964807 |
| chr13 | 48974649 | 48974769 |
| chr13 | 48986971 | 48987091 |
| chr13 | 48997632 | 48997752 |
| chr13 | 49011026 | 49011146 |
| chr13 | 49012204 | 49012324 |
| chr13 | 49016002 | 49016122 |
| chr13 | 49027087 | 49027287 |
| chr13 | 49030292 | 49030532 |
| chr13 | 49033776 | 49034016 |
| chr13 | 49037818 | 49038018 |
| chr13 | 49038616 | 49038736 |
| chr13 | 49039090 | 49039562 |
| chr13 | 49047410 | 49047610 |
| chr13 | 49050787 | 49051027 |
| chr13 | 49051435 | 49051595 |
| chr13 | 49054090 | 49054250 |
| chr13 | 49417952 | 49418072 |
| chr13 | 52418538 | 52418658 |
| chr13 | 55429904 | 55430024 |
| chr13 | 58503158 | 58503278 |
| chr13 | 61517322 | 61517442 |
| chr13 | 63071726 | 63071846 |
| chr13 | 64540321 | 64540441 |
| chr13 | 67588660 | 67588780 |
| chr13 | 70592644 | 70592764 |
| chr13 | 73333874 | 73334074 |
| chr13 | 73334607 | 73334847 |

|       |          |          |
|-------|----------|----------|
| chr13 | 73334960 | 73335080 |
| chr13 | 73335322 | 73335442 |
| chr13 | 73335459 | 73335699 |
| chr13 | 73335727 | 73336007 |
| chr13 | 73336047 | 73336287 |
| chr13 | 73337546 | 73337786 |
| chr13 | 73338287 | 73338407 |
| chr13 | 73338787 | 73338907 |
| chr13 | 73340052 | 73340252 |
| chr13 | 73340478 | 73340598 |
| chr13 | 73341150 | 73341270 |
| chr13 | 73341613 | 73341758 |
| chr13 | 73342866 | 73343106 |
| chr13 | 73343653 | 73343773 |
| chr13 | 73344772 | 73344892 |
| chr13 | 73344983 | 73345330 |
| chr13 | 73345883 | 73346083 |
| chr13 | 73346254 | 73346454 |
| chr13 | 73346783 | 73347023 |
| chr13 | 73347770 | 73348010 |
| chr13 | 73348040 | 73348240 |
| chr13 | 73349164 | 73349284 |
| chr13 | 73349290 | 73349570 |
| chr13 | 73350006 | 73350286 |
| chr13 | 73351016 | 73351136 |
| chr13 | 73351514 | 73351674 |
| chr13 | 73352281 | 73352561 |
| chr13 | 73354942 | 73355182 |
| chr13 | 73355380 | 73355540 |
| chr13 | 73355736 | 73355976 |
| chr13 | 73641690 | 73641810 |
| chr13 | 76678698 | 76678818 |
| chr13 | 79703091 | 79703211 |
| chr13 | 83101233 | 83101353 |
| chr13 | 86109634 | 86109754 |
| chr13 | 86230852 | 86230972 |
| chr13 | 89146686 | 89146806 |
| chr13 | 92051241 | 92051521 |
| chr13 | 92052048 | 92052168 |
| chr13 | 92100955 | 92101235 |
| chr13 | 92126712 | 92126832 |
| chr13 | 92149292 | 92149412 |
| chr13 | 92172217 | 92172337 |

|       |          |          |
|-------|----------|----------|
| chr13 | 92290119 | 92290239 |
| chr13 | 92345427 | 92346147 |
| chr13 | 92380732 | 92380972 |
| chr13 | 92408491 | 92408731 |
| chr13 | 92560130 | 92560370 |
| chr13 | 92643300 | 92643420 |
| chr13 | 92792447 | 92792567 |
| chr13 | 92797022 | 92797302 |
| chr13 | 92835612 | 92835732 |
| chr13 | 93057964 | 93058084 |
| chr13 | 93071675 | 93071795 |
| chr13 | 93141919 | 93142039 |
| chr13 | 93230315 | 93230435 |
| chr13 | 93279125 | 93279245 |
| chr13 | 93319740 | 93319860 |
| chr13 | 93360098 | 93360218 |
| chr13 | 93477251 | 93477371 |
| chr13 | 93518473 | 93518753 |
| chr13 | 95226990 | 95227150 |
| chr13 | 95228516 | 95228716 |
| chr13 | 95229573 | 95229733 |
| chr13 | 95230201 | 95230481 |
| chr13 | 95230925 | 95231085 |
| chr13 | 95232097 | 95232257 |
| chr13 | 95233293 | 95233493 |
| chr13 | 95233519 | 95233748 |
| chr13 | 95235298 | 95235538 |
| chr13 | 95235829 | 95235950 |
| chr13 | 95236764 | 95236884 |
| chr13 | 95238093 | 95238213 |
| chr13 | 95238823 | 95238943 |
| chr13 | 95242592 | 95242712 |
| chr13 | 95243051 | 95243251 |
| chr13 | 95243946 | 95244066 |
| chr13 | 95244448 | 95244608 |
| chr13 | 95246047 | 95246207 |
| chr13 | 95246379 | 95246499 |
| chr13 | 95246822 | 95246942 |
| chr13 | 95248247 | 95248447 |
| chr13 | 95254133 | 95254441 |
| chr13 | 95257603 | 95257843 |
| chr13 | 95258766 | 95259006 |
| chr13 | 95259475 | 95259595 |

|       |           |           |
|-------|-----------|-----------|
| chr13 | 95260360  | 95260480  |
| chr13 | 95261983  | 95262223  |
| chr13 | 95263863  | 95263983  |
| chr13 | 95264423  | 95264663  |
| chr13 | 95271353  | 95271633  |
| chr13 | 95271666  | 95271826  |
| chr13 | 95273017  | 95273248  |
| chr13 | 95273290  | 95273530  |
| chr13 | 95275318  | 95275672  |
| chr13 | 95278178  | 95278338  |
| chr13 | 95279225  | 95279465  |
| chr13 | 95353821  | 95353941  |
| chr13 | 95356234  | 95356354  |
| chr13 | 95356671  | 95356791  |
| chr13 | 95363467  | 95364307  |
| chr13 | 95365084  | 95365204  |
| chr13 | 95366759  | 95366997  |
| chr13 | 95367288  | 95367408  |
| chr13 | 95367549  | 95367669  |
| chr13 | 95367884  | 95368004  |
| chr13 | 95368778  | 95368898  |
| chr13 | 95369995  | 95370115  |
| chr13 | 95371519  | 95371639  |
| chr13 | 98272842  | 98272962  |
| chr13 | 101286914 | 101287034 |
| chr13 | 104309116 | 104309236 |
| chr13 | 107325201 | 107325321 |
| chr13 | 110333236 | 110333356 |
| chr13 | 110818537 | 110818657 |
| chr13 | 113343441 | 113343561 |
| chr13 | 113863909 | 113864189 |
| chr13 | 113864224 | 113864464 |
| chr13 | 113873190 | 113873430 |
| chr13 | 113882224 | 113882424 |
| chr13 | 113883696 | 113883896 |
| chr13 | 113887439 | 113887679 |
| chr13 | 113888155 | 113888355 |
| chr13 | 113889317 | 113889517 |
| chr13 | 113891070 | 113891270 |
| chr13 | 113893685 | 113893925 |
| chr13 | 113897257 | 113897497 |
| chr13 | 113898655 | 113898895 |
| chr13 | 113899197 | 113899608 |

|       |           |           |
|-------|-----------|-----------|
| chr13 | 113900203 | 113900443 |
| chr13 | 113907304 | 113907544 |
| chr13 | 113908939 | 113909179 |
| chr13 | 113909212 | 113909492 |
| chr13 | 113914861 | 113915141 |
| chr13 | 113917748 | 113917948 |
| chr14 | 20213877  | 20213997  |
| chr14 | 21853690  | 21854013  |
| chr14 | 21854033  | 21854353  |
| chr14 | 21859043  | 21859283  |
| chr14 | 21859571  | 21859851  |
| chr14 | 21859928  | 21860168  |
| chr14 | 21860636  | 21860996  |
| chr14 | 21861198  | 21861478  |
| chr14 | 21861614  | 21862374  |
| chr14 | 21862419  | 21862659  |
| chr14 | 21863054  | 21863294  |
| chr14 | 21863403  | 21863563  |
| chr14 | 21863913  | 21864113  |
| chr14 | 21865926  | 21866166  |
| chr14 | 21867692  | 21867932  |
| chr14 | 21868084  | 21868527  |
| chr14 | 21868551  | 21868791  |
| chr14 | 21869011  | 21869251  |
| chr14 | 21869496  | 21869736  |
| chr14 | 21870065  | 21870345  |
| chr14 | 21870438  | 21870718  |
| chr14 | 21871153  | 21871393  |
| chr14 | 21871596  | 21871836  |
| chr14 | 21873355  | 21873635  |
| chr14 | 21873811  | 21874091  |
| chr14 | 21874962  | 21875242  |
| chr14 | 21876452  | 21876732  |
| chr14 | 21876803  | 21877043  |
| chr14 | 21877958  | 21878198  |
| chr14 | 21881013  | 21881213  |
| chr14 | 21882398  | 21882638  |
| chr14 | 21883044  | 21883204  |
| chr14 | 21883705  | 21884094  |
| chr14 | 21894223  | 21894463  |
| chr14 | 21896000  | 21896440  |
| chr14 | 21897108  | 21897670  |
| chr14 | 21898940  | 21899820  |

|       |          |          |
|-------|----------|----------|
| chr14 | 21899872 | 21900072 |
| chr14 | 23218787 | 23218907 |
| chr14 | 23495280 | 23495600 |
| chr14 | 23496889 | 23497089 |
| chr14 | 23502549 | 23502909 |
| chr14 | 23503871 | 23504111 |
| chr14 | 26280522 | 26280642 |
| chr14 | 29384049 | 29384169 |
| chr14 | 32389796 | 32389916 |
| chr14 | 34195265 | 34195385 |
| chr14 | 35390086 | 35390206 |
| chr14 | 35862343 | 35862463 |
| chr14 | 35868453 | 35868573 |
| chr14 | 35869806 | 35869926 |
| chr14 | 35870393 | 35870513 |
| chr14 | 35871162 | 35871322 |
| chr14 | 35871346 | 35871466 |
| chr14 | 35871594 | 35871874 |
| chr14 | 35871899 | 35872153 |
| chr14 | 35872246 | 35872580 |
| chr14 | 35872657 | 35873049 |
| chr14 | 35873616 | 35873856 |
| chr14 | 35874705 | 35874945 |
| chr14 | 35880659 | 35880899 |
| chr14 | 38428112 | 38428232 |
| chr14 | 41444695 | 41444815 |
| chr14 | 44462345 | 44462465 |
| chr14 | 47493373 | 47493493 |
| chr14 | 50497984 | 50498104 |
| chr14 | 53499837 | 53499957 |
| chr14 | 54123898 | 54124018 |
| chr14 | 56511403 | 56511523 |
| chr14 | 58766475 | 58766675 |
| chr14 | 58768252 | 58768452 |
| chr14 | 58770158 | 58770358 |
| chr14 | 58771614 | 58771774 |
| chr14 | 58771957 | 58772077 |
| chr14 | 58772684 | 58772884 |
| chr14 | 58779356 | 58779476 |
| chr14 | 58785219 | 58785575 |
| chr14 | 58790148 | 58790388 |
| chr14 | 58793940 | 58794060 |
| chr14 | 58794914 | 58795074 |



|       |          |          |
|-------|----------|----------|
| chr14 | 58796203 | 58796363 |
| chr14 | 58796663 | 58796943 |
| chr14 | 58797586 | 58797706 |
| chr14 | 58797892 | 58798012 |
| chr14 | 58799300 | 58799420 |
| chr14 | 58811368 | 58811528 |
| chr14 | 58813075 | 58813275 |
| chr14 | 58813686 | 58813886 |
| chr14 | 58814360 | 58814600 |
| chr14 | 58815925 | 58816045 |
| chr14 | 58817775 | 58818055 |
| chr14 | 58820334 | 58820614 |
| chr14 | 58821868 | 58821988 |
| chr14 | 58822972 | 58823092 |
| chr14 | 58825791 | 58825991 |
| chr14 | 58827569 | 58827809 |
| chr14 | 58830872 | 58832032 |
| chr14 | 58832187 | 58832387 |
| chr14 | 58832724 | 58832964 |
| chr14 | 58833553 | 58833793 |
| chr14 | 58834331 | 58834451 |
| chr14 | 58838555 | 58838755 |
| chr14 | 59534777 | 59534897 |
| chr14 | 62536626 | 62536746 |
| chr14 | 65544390 | 65544510 |
| chr14 | 68609259 | 68609379 |
| chr14 | 71197078 | 71197598 |
| chr14 | 71199233 | 71200113 |
| chr14 | 71201038 | 71201278 |
| chr14 | 71202611 | 71202811 |
| chr14 | 71204898 | 71205178 |
| chr14 | 71206699 | 71206939 |
| chr14 | 71209047 | 71209327 |
| chr14 | 71215535 | 71215815 |
| chr14 | 71216583 | 71216863 |
| chr14 | 71227690 | 71227930 |
| chr14 | 71267370 | 71267810 |
| chr14 | 71275463 | 71275783 |
| chr14 | 71275789 | 71275909 |
| chr14 | 71632929 | 71633049 |
| chr14 | 74673703 | 74673823 |
| chr14 | 77722407 | 77722527 |
| chr14 | 80773310 | 80773430 |

|       |          |          |
|-------|----------|----------|
| chr14 | 83790199 | 83790319 |
| chr14 | 85125226 | 85125346 |
| chr14 | 86817101 | 86817221 |
| chr14 | 89696458 | 89696578 |
| chr14 | 89844754 | 89844874 |
| chr14 | 90194030 | 90194150 |
| chr14 | 90715990 | 90716110 |
| chr14 | 91689437 | 91689557 |
| chr14 | 92199497 | 92199617 |
| chr14 | 92717989 | 92718109 |
| chr14 | 92846234 | 92846354 |
| chr14 | 93715813 | 93715933 |
| chr14 | 94197412 | 94197532 |
| chr14 | 94680595 | 94680715 |
| chr14 | 95174205 | 95174325 |
| chr14 | 95556777 | 95557057 |
| chr14 | 95557328 | 95557760 |
| chr14 | 95560218 | 95560498 |
| chr14 | 95562099 | 95563059 |
| chr14 | 95566074 | 95566314 |
| chr14 | 95569672 | 95570472 |
| chr14 | 95571355 | 95571635 |
| chr14 | 95571967 | 95572167 |
| chr14 | 95572328 | 95572608 |
| chr14 | 95573901 | 95574141 |
| chr14 | 95574203 | 95574443 |
| chr14 | 95574610 | 95574890 |
| chr14 | 95577603 | 95577843 |
| chr14 | 95578466 | 95578626 |
| chr14 | 95579374 | 95579614 |
| chr14 | 95581960 | 95582200 |
| chr14 | 95582770 | 95583050 |
| chr14 | 95583904 | 95584144 |
| chr14 | 95590528 | 95591008 |
| chr14 | 95592860 | 95593140 |
| chr14 | 95595748 | 95596028 |
| chr14 | 95596341 | 95596581 |
| chr14 | 95597790 | 95598030 |
| chr14 | 95598792 | 95599072 |
| chr14 | 95599603 | 95599843 |
| chr14 | 95686016 | 95686136 |
| chr14 | 95846907 | 95847027 |
| chr14 | 96161492 | 96161612 |

|       |           |           |
|-------|-----------|-----------|
| chr14 | 96660275  | 96660395  |
| chr14 | 97173332  | 97173452  |
| chr14 | 97239155  | 97239275  |
| chr14 | 97667526  | 97667646  |
| chr14 | 98175406  | 98175526  |
| chr14 | 98680648  | 98680768  |
| chr14 | 98863667  | 98863787  |
| chr14 | 99172319  | 99172439  |
| chr14 | 99671727  | 99671847  |
| chr14 | 100166238 | 100166358 |
| chr14 | 100659905 | 100660025 |
| chr14 | 101170479 | 101170599 |
| chr14 | 101668540 | 101668660 |
| chr14 | 101872239 | 101872359 |
| chr14 | 102673932 | 102674052 |
| chr14 | 103209104 | 103209224 |
| chr14 | 103336520 | 103336800 |
| chr14 | 103337192 | 103337312 |
| chr14 | 103338199 | 103338359 |
| chr14 | 103341912 | 103342112 |
| chr14 | 103342638 | 103342918 |
| chr14 | 103344246 | 103344366 |
| chr14 | 103344965 | 103345085 |
| chr14 | 103345406 | 103345526 |
| chr14 | 103348682 | 103348802 |
| chr14 | 103349115 | 103349235 |
| chr14 | 103351468 | 103351588 |
| chr14 | 103352105 | 103352225 |
| chr14 | 103352465 | 103352665 |
| chr14 | 103354212 | 103354332 |
| chr14 | 103355853 | 103356013 |
| chr14 | 103357249 | 103357369 |
| chr14 | 103357542 | 103357807 |
| chr14 | 103361359 | 103361519 |
| chr14 | 103361675 | 103361795 |
| chr14 | 103361956 | 103362076 |
| chr14 | 103363547 | 103363787 |
| chr14 | 103369538 | 103369818 |
| chr14 | 103371535 | 103372135 |
| chr14 | 103707356 | 103707476 |
| chr14 | 104212888 | 104213008 |
| chr14 | 104711427 | 104711547 |
| chr14 | 104888451 | 104888571 |

|       |           |           |
|-------|-----------|-----------|
| chr14 | 105212338 | 105212458 |
| chr14 | 105235862 | 105236022 |
| chr14 | 105236637 | 105236797 |
| chr14 | 105237032 | 105237232 |
| chr14 | 105238645 | 105238845 |
| chr14 | 105239201 | 105239441 |
| chr14 | 105239531 | 105239974 |
| chr14 | 105240202 | 105240362 |
| chr14 | 105241227 | 105241598 |
| chr14 | 105241942 | 105242182 |
| chr14 | 105242951 | 105243151 |
| chr14 | 105246368 | 105246608 |
| chr14 | 105258877 | 105259037 |
| chr14 | 105684660 | 105684780 |
| chr14 | 105994186 | 106001746 |
| chr14 | 106002282 | 106005476 |
| chr14 | 106005596 | 106005936 |
| chr14 | 106006235 | 106006475 |
| chr14 | 106007030 | 106011199 |
| chr14 | 106011285 | 106011405 |
| chr14 | 106011439 | 106011559 |
| chr14 | 106011637 | 106014175 |
| chr14 | 106014298 | 106014658 |
| chr14 | 106015376 | 106017297 |
| chr14 | 106017389 | 106017509 |
| chr14 | 106017858 | 106018430 |
| chr14 | 106018778 | 106019099 |
| chr14 | 106019219 | 106019485 |
| chr14 | 106019843 | 106019969 |
| chr14 | 106020065 | 106020665 |
| chr14 | 106020905 | 106021446 |
| chr14 | 106021700 | 106021976 |
| chr14 | 106022083 | 106022760 |
| chr14 | 106023117 | 106023717 |
| chr14 | 106023937 | 106024537 |
| chr14 | 106024748 | 106039560 |
| chr14 | 106039680 | 106049464 |
| chr14 | 106049477 | 106056715 |
| chr14 | 106057476 | 106063236 |
| chr14 | 106063540 | 106075753 |
| chr14 | 106075955 | 106086328 |
| chr14 | 106086354 | 106103126 |
| chr14 | 106103201 | 106105390 |

|       |           |           |
|-------|-----------|-----------|
| chr14 | 106105403 | 106121392 |
| chr14 | 106121580 | 106123260 |
| chr14 | 106123454 | 106124852 |
| chr14 | 106124928 | 106129049 |
| chr14 | 106129069 | 106136629 |
| chr14 | 106136889 | 106137009 |
| chr14 | 106137132 | 106141816 |
| chr14 | 106142075 | 106142228 |
| chr14 | 106142450 | 106143177 |
| chr14 | 106143495 | 106144215 |
| chr14 | 106144239 | 106144959 |
| chr14 | 106145166 | 106159869 |
| chr14 | 106160151 | 106164746 |
| chr14 | 106164816 | 106184233 |
| chr14 | 106185180 | 106190700 |
| chr14 | 106190889 | 106191009 |
| chr14 | 106191250 | 106192810 |
| chr14 | 106193005 | 106194383 |
| chr14 | 106194441 | 106202174 |
| chr14 | 106202297 | 106211057 |
| chr14 | 106211224 | 106220465 |
| chr14 | 106220584 | 106222176 |
| chr14 | 106222378 | 106223757 |
| chr14 | 106223837 | 106230334 |
| chr14 | 106230442 | 106244803 |
| chr14 | 106244930 | 106245117 |
| chr14 | 106245141 | 106245381 |
| chr14 | 106245679 | 106253279 |
| chr14 | 106253549 | 106253789 |
| chr14 | 106253883 | 106255452 |
| chr14 | 106255562 | 106255829 |
| chr14 | 106255978 | 106256380 |
| chr14 | 106256446 | 106259086 |
| chr14 | 106259208 | 106262053 |
| chr14 | 106262171 | 106262387 |
| chr14 | 106262795 | 106264235 |
| chr14 | 106264321 | 106267859 |
| chr14 | 106268239 | 106268719 |
| chr14 | 106268790 | 106270125 |
| chr14 | 106270486 | 106271758 |
| chr14 | 106272025 | 106275927 |
| chr14 | 106276171 | 106277131 |
| chr14 | 106277335 | 106277455 |

|       |           |           |
|-------|-----------|-----------|
| chr14 | 106277659 | 106279067 |
| chr14 | 106279334 | 106280414 |
| chr14 | 106280575 | 106287851 |
| chr14 | 106287971 | 106291172 |
| chr14 | 106291455 | 106291575 |
| chr14 | 106292003 | 106292235 |
| chr14 | 106292665 | 106292786 |
| chr14 | 106293049 | 106293259 |
| chr14 | 106293726 | 106294110 |
| chr14 | 106294324 | 106294729 |
| chr14 | 106294903 | 106295263 |
| chr14 | 106295327 | 106295517 |
| chr14 | 106295637 | 106295824 |
| chr14 | 106296047 | 106296167 |
| chr14 | 106296238 | 106296478 |
| chr14 | 106296543 | 106300326 |
| chr14 | 106300582 | 106309141 |
| chr14 | 106309364 | 106336327 |
| chr14 | 106336395 | 106336949 |
| chr14 | 106337189 | 106337651 |
| chr14 | 106337770 | 106337891 |
| chr14 | 106337985 | 106338346 |
| chr14 | 106338389 | 106338629 |
| chr14 | 106338636 | 106338876 |
| chr14 | 106338985 | 106339225 |
| chr14 | 106339335 | 106339779 |
| chr14 | 106339836 | 106340471 |
| chr14 | 106340817 | 106344769 |
| chr14 | 106345082 | 106362301 |
| chr14 | 106362330 | 106399935 |
| chr14 | 106400053 | 106400173 |
| chr14 | 106400263 | 106402183 |
| chr14 | 106402229 | 106408349 |
| chr14 | 106408641 | 106408826 |
| chr14 | 106409012 | 106409732 |
| chr14 | 106409822 | 106412976 |
| chr14 | 106413188 | 106413308 |
| chr14 | 106413359 | 106414079 |
| chr14 | 106414282 | 106414642 |
| chr14 | 106414736 | 106415816 |
| chr14 | 106415880 | 106418880 |
| chr14 | 106418910 | 106421644 |
| chr14 | 106421749 | 106421989 |

|       |           |           |
|-------|-----------|-----------|
| chr14 | 106427767 | 106427896 |
| chr14 | 106428097 | 106428217 |
| chr14 | 106428305 | 106429109 |
| chr14 | 106429607 | 106429727 |
| chr14 | 106429918 | 106430044 |
| chr14 | 106430128 | 106430488 |
| chr14 | 106430680 | 106432124 |
| chr14 | 106432947 | 106438899 |
| chr14 | 106438997 | 106451717 |
| chr14 | 106451983 | 106452159 |
| chr14 | 106452367 | 106455348 |
| chr14 | 106455534 | 106458414 |
| chr14 | 106458556 | 106459756 |
| chr14 | 106459957 | 106464103 |
| chr14 | 106464292 | 106470532 |
| chr14 | 106470535 | 106472815 |
| chr14 | 106472912 | 106475230 |
| chr14 | 106475469 | 106478949 |
| chr14 | 106479207 | 106486047 |
| chr14 | 106486182 | 106487502 |
| chr14 | 106487729 | 106487849 |
| chr14 | 106488092 | 106488219 |
| chr14 | 106488487 | 106496407 |
| chr14 | 106496585 | 106498745 |
| chr14 | 106499116 | 106500459 |
| chr14 | 106500646 | 106506189 |
| chr14 | 106506491 | 106506868 |
| chr14 | 106507015 | 106513464 |
| chr14 | 106513803 | 106531812 |
| chr14 | 106532088 | 106532208 |
| chr14 | 106535142 | 106542942 |
| chr14 | 106543114 | 106562020 |
| chr14 | 106563965 | 106564271 |
| chr14 | 106564352 | 106564472 |
| chr14 | 106565135 | 106568161 |
| chr14 | 106568166 | 106568286 |
| chr14 | 106569631 | 106571676 |
| chr14 | 106571793 | 106588172 |
| chr14 | 106588175 | 106588895 |
| chr14 | 106589016 | 106590971 |
| chr14 | 106591053 | 106594777 |
| chr14 | 106594971 | 106596051 |
| chr14 | 106596442 | 106602082 |

|       |           |           |
|-------|-----------|-----------|
| chr14 | 106602287 | 106606197 |
| chr14 | 106606289 | 106607992 |
| chr14 | 106608089 | 106615169 |
| chr14 | 106616066 | 106616186 |
| chr14 | 106616332 | 106616457 |
| chr14 | 106617135 | 106617297 |
| chr14 | 106617344 | 106617464 |
| chr14 | 106617772 | 106618010 |
| chr14 | 106618143 | 106618348 |
| chr14 | 106618525 | 106618765 |
| chr14 | 106618889 | 106623883 |
| chr14 | 106624003 | 106626604 |
| chr14 | 106626707 | 106633907 |
| chr14 | 106634126 | 106637726 |
| chr14 | 106637921 | 106640365 |
| chr14 | 106640485 | 106646567 |
| chr14 | 106646765 | 106647419 |
| chr14 | 106647539 | 106652319 |
| chr14 | 106652509 | 106653797 |
| chr14 | 106653984 | 106663651 |
| chr14 | 106663762 | 106669482 |
| chr14 | 106669754 | 106677261 |
| chr14 | 106677586 | 106687763 |
| chr14 | 106687839 | 106699454 |
| chr14 | 106701254 | 106701442 |
| chr14 | 106701714 | 106701847 |
| chr14 | 106702483 | 106702606 |
| chr14 | 106704232 | 106704485 |
| chr14 | 106704605 | 106706677 |
| chr14 | 106706797 | 106707923 |
| chr14 | 106708087 | 106710894 |
| chr14 | 106710953 | 106713760 |
| chr14 | 106713879 | 106719519 |
| chr14 | 106719630 | 106723586 |
| chr14 | 106723687 | 106737005 |
| chr14 | 106737123 | 106737243 |
| chr14 | 106737245 | 106748918 |
| chr14 | 106749819 | 106753716 |
| chr14 | 106754175 | 106754734 |
| chr14 | 106754854 | 106754974 |
| chr14 | 106755842 | 106762248 |
| chr14 | 106762331 | 106768691 |
| chr14 | 106768866 | 106769055 |



|       |           |           |
|-------|-----------|-----------|
| chr14 | 106769156 | 106773716 |
| chr14 | 106773809 | 106783142 |
| chr14 | 106783262 | 106793128 |
| chr14 | 106793132 | 106793922 |
| chr14 | 106794348 | 106794988 |
| chr14 | 106795019 | 106796939 |
| chr14 | 106796991 | 106807777 |
| chr14 | 106808105 | 106818656 |
| chr14 | 106819092 | 106819523 |
| chr14 | 106819643 | 106821526 |
| chr14 | 106821743 | 106821983 |
| chr14 | 106822151 | 106837851 |
| chr14 | 106837944 | 106838958 |
| chr14 | 106839096 | 106843384 |
| chr14 | 106843693 | 106844293 |
| chr14 | 106844370 | 106847250 |
| chr14 | 106847570 | 106854050 |
| chr14 | 106854171 | 106854291 |
| chr14 | 106854308 | 106855868 |
| chr14 | 106856208 | 106856364 |
| chr14 | 106856750 | 106861430 |
| chr14 | 106863813 | 106864293 |
| chr14 | 106864356 | 106865076 |
| chr14 | 106865143 | 106870058 |
| chr14 | 106870238 | 106871798 |
| chr14 | 106871972 | 106875050 |
| chr14 | 106875091 | 106883131 |
| chr14 | 106886181 | 106891889 |
| chr14 | 106892134 | 106894045 |
| chr14 | 106894575 | 106897575 |
| chr14 | 106897741 | 106898514 |
| chr14 | 106898727 | 106900767 |
| chr14 | 106901009 | 106903458 |
| chr14 | 106903553 | 106903793 |
| chr14 | 106903934 | 106909291 |
| chr14 | 106909627 | 106913208 |
| chr14 | 106913533 | 106914613 |
| chr14 | 106914963 | 106915443 |
| chr14 | 106915539 | 106918179 |
| chr14 | 106918861 | 106928461 |
| chr14 | 106928519 | 106935479 |
| chr14 | 106935540 | 106935660 |
| chr14 | 106935789 | 106935909 |

|       |           |           |
|-------|-----------|-----------|
| chr14 | 106936079 | 106937469 |
| chr14 | 106937757 | 106947357 |
| chr14 | 106947460 | 106947944 |
| chr14 | 106948050 | 106948170 |
| chr14 | 106948364 | 106949564 |
| chr14 | 106949744 | 106950824 |
| chr14 | 106951082 | 106952042 |
| chr14 | 106952218 | 106954054 |
| chr14 | 106954207 | 106954327 |
| chr14 | 106954664 | 106955498 |
| chr14 | 106955588 | 106955792 |
| chr14 | 106955912 | 106956724 |
| chr14 | 106956944 | 106960664 |
| chr14 | 106960934 | 106965974 |
| chr14 | 106966017 | 106972314 |
| chr14 | 106972522 | 106978625 |
| chr14 | 106978721 | 106979990 |
| chr14 | 106980082 | 106983769 |
| chr14 | 106983917 | 106991086 |
| chr14 | 106991205 | 106995510 |
| chr14 | 106996059 | 106996419 |
| chr14 | 106996724 | 106999695 |
| chr14 | 107000026 | 107006114 |
| chr14 | 107006208 | 107009378 |
| chr14 | 107009468 | 107012174 |
| chr14 | 107012282 | 107017890 |
| chr14 | 107018202 | 107019642 |
| chr14 | 107019977 | 107023577 |
| chr14 | 107023940 | 107025287 |
| chr14 | 107025491 | 107025820 |
| chr14 | 107025907 | 107044977 |
| chr14 | 107045273 | 107047193 |
| chr14 | 107048198 | 107072624 |
| chr14 | 107072868 | 107085604 |
| chr14 | 107085743 | 107085863 |
| chr14 | 107086057 | 107090781 |
| chr14 | 107090881 | 107092681 |
| chr14 | 107092820 | 107097482 |
| chr14 | 107097615 | 107097735 |
| chr14 | 107097936 | 107100782 |
| chr14 | 107101048 | 107102828 |
| chr14 | 107102948 | 107105029 |
| chr14 | 107105121 | 107110041 |

|       |           |           |
|-------|-----------|-----------|
| chr14 | 107110250 | 107115782 |
| chr14 | 107115862 | 107115982 |
| chr14 | 107116345 | 107127073 |
| chr14 | 107127177 | 107128847 |
| chr14 | 107129037 | 107129680 |
| chr14 | 107129774 | 107149078 |
| chr14 | 107149259 | 107165850 |
| chr14 | 107166247 | 107176087 |
| chr14 | 107176092 | 107185906 |
| chr14 | 107186020 | 107186140 |
| chr14 | 107186260 | 107188239 |
| chr14 | 107188360 | 107188927 |
| chr14 | 107189197 | 107191063 |
| chr14 | 107191262 | 107191382 |
| chr14 | 107191552 | 107191912 |
| chr14 | 107192265 | 107196542 |
| chr14 | 107196579 | 107203163 |
| chr14 | 107203755 | 107205085 |
| chr14 | 107206546 | 107214868 |
| chr14 | 107215204 | 107226874 |
| chr14 | 107226962 | 107227202 |
| chr14 | 107228052 | 107239268 |
| chr14 | 107239630 | 107242750 |
| chr14 | 107242960 | 107258431 |
| chr14 | 107258654 | 107264117 |
| chr14 | 107264378 | 107264661 |
| chr14 | 107264814 | 107264934 |
| chr14 | 107265242 | 107265362 |
| chr14 | 107266347 | 107266467 |
| chr14 | 107266642 | 107266800 |
| chr14 | 107266883 | 107267073 |
| chr14 | 107267123 | 107267282 |
| chr14 | 107267402 | 107271568 |
| chr14 | 107272847 | 107273129 |
| chr14 | 107273479 | 107274799 |
| chr14 | 107275078 | 107279474 |
| chr14 | 107279764 | 107280490 |
| chr14 | 107280676 | 107284756 |
| chr14 | 107284960 | 107287165 |
| chr14 | 107287246 | 107288072 |
| chr15 | 20161312  | 20161432  |
| chr15 | 23648732  | 23648852  |
| chr15 | 26653158  | 26653278  |

|       |          |          |
|-------|----------|----------|
| chr15 | 29653229 | 29653349 |
| chr15 | 32922887 | 32923007 |
| chr15 | 35927595 | 35927715 |
| chr15 | 38930463 | 38930583 |
| chr15 | 40453358 | 40453518 |
| chr15 | 40457185 | 40457465 |
| chr15 | 40462193 | 40462433 |
| chr15 | 40462669 | 40462949 |
| chr15 | 40466057 | 40466257 |
| chr15 | 40468655 | 40468895 |
| chr15 | 40475859 | 40476139 |
| chr15 | 40477352 | 40477592 |
| chr15 | 40477697 | 40477897 |
| chr15 | 40488720 | 40489000 |
| chr15 | 40491751 | 40491991 |
| chr15 | 40492382 | 40492622 |
| chr15 | 40493076 | 40493236 |
| chr15 | 40494528 | 40494962 |
| chr15 | 40498361 | 40498681 |
| chr15 | 40500784 | 40501024 |
| chr15 | 40501765 | 40502045 |
| chr15 | 40502240 | 40502480 |
| chr15 | 40504634 | 40504914 |
| chr15 | 40505463 | 40505743 |
| chr15 | 40509642 | 40509922 |
| chr15 | 40510589 | 40510829 |
| chr15 | 40512742 | 40512982 |
| chr15 | 41961064 | 41962184 |
| chr15 | 41964813 | 41964933 |
| chr15 | 41988246 | 41989246 |
| chr15 | 41990999 | 41991392 |
| chr15 | 41999871 | 42000111 |
| chr15 | 42000233 | 42000473 |
| chr15 | 42002877 | 42003557 |
| chr15 | 42005332 | 42005612 |
| chr15 | 42005665 | 42005865 |
| chr15 | 42019350 | 42019630 |
| chr15 | 42021334 | 42021574 |
| chr15 | 42026655 | 42026855 |
| chr15 | 42028357 | 42028917 |
| chr15 | 42032185 | 42032465 |
| chr15 | 42034716 | 42035396 |
| chr15 | 42040819 | 42041139 |

|       |          |          |
|-------|----------|----------|
| chr15 | 42041280 | 42042840 |
| chr15 | 42046579 | 42046819 |
| chr15 | 42049931 | 42050091 |
| chr15 | 42052503 | 42052743 |
| chr15 | 42053872 | 42054112 |
| chr15 | 42054303 | 42054583 |
| chr15 | 42057031 | 42057311 |
| chr15 | 42058179 | 42059499 |
| chr15 | 45048591 | 45048711 |
| chr15 | 48051592 | 48051712 |
| chr15 | 51207145 | 51207265 |
| chr15 | 52027716 | 52027836 |
| chr15 | 54209462 | 54209582 |
| chr15 | 57213223 | 57213343 |
| chr15 | 60222870 | 60222990 |
| chr15 | 63242223 | 63242343 |
| chr15 | 66253057 | 66253177 |
| chr15 | 67358475 | 67358715 |
| chr15 | 67430301 | 67430501 |
| chr15 | 67457209 | 67457449 |
| chr15 | 67457536 | 67457776 |
| chr15 | 67459053 | 67459253 |
| chr15 | 67462836 | 67462996 |
| chr15 | 67473564 | 67473804 |
| chr15 | 67477013 | 67477253 |
| chr15 | 67479634 | 67479914 |
| chr15 | 67482692 | 67482932 |
| chr15 | 69282208 | 69282328 |
| chr15 | 72299971 | 72300091 |
| chr15 | 74836273 | 74836833 |
| chr15 | 74843949 | 74844069 |
| chr15 | 74845684 | 74845804 |
| chr15 | 74851355 | 74851475 |
| chr15 | 74853620 | 74853740 |
| chr15 | 74860624 | 74860744 |
| chr15 | 74865158 | 74865588 |
| chr15 | 74868039 | 74868159 |
| chr15 | 74869377 | 74869497 |
| chr15 | 74871830 | 74871950 |
| chr15 | 74873618 | 74873738 |
| chr15 | 74882112 | 74882392 |
| chr15 | 74883473 | 74883793 |
| chr15 | 74883887 | 74884167 |

|       |          |          |
|-------|----------|----------|
| chr15 | 74885002 | 74885122 |
| chr15 | 74885427 | 74885627 |
| chr15 | 74887893 | 74888173 |
| chr15 | 75304980 | 75305100 |
| chr15 | 78311283 | 78311403 |
| chr15 | 79696640 | 79696760 |
| chr15 | 81316033 | 81316153 |
| chr15 | 84321369 | 84321489 |
| chr15 | 86123927 | 86124047 |
| chr15 | 86124494 | 86124614 |
| chr15 | 87326491 | 87326611 |
| chr15 | 90327747 | 90327867 |
| chr15 | 90627441 | 90627641 |
| chr15 | 90627993 | 90628381 |
| chr15 | 90628442 | 90628682 |
| chr15 | 90630279 | 90630559 |
| chr15 | 90630618 | 90630858 |
| chr15 | 90631522 | 90632038 |
| chr15 | 90633653 | 90633933 |
| chr15 | 90634730 | 90634930 |
| chr15 | 90645444 | 90645684 |
| chr15 | 91290571 | 91290771 |
| chr15 | 91292566 | 91293326 |
| chr15 | 91294956 | 91295236 |
| chr15 | 91297984 | 91298224 |
| chr15 | 91303322 | 91303562 |
| chr15 | 91303794 | 91304514 |
| chr15 | 91306171 | 91306411 |
| chr15 | 91308464 | 91308704 |
| chr15 | 91310037 | 91310277 |
| chr15 | 91312311 | 91312511 |
| chr15 | 91312601 | 91312881 |
| chr15 | 91325984 | 91326224 |
| chr15 | 91328090 | 91328370 |
| chr15 | 91333856 | 91334096 |
| chr15 | 91337371 | 91337611 |
| chr15 | 91341353 | 91341633 |
| chr15 | 91346730 | 91346970 |
| chr15 | 91347372 | 91347612 |
| chr15 | 91352307 | 91352547 |
| chr15 | 91354415 | 91354655 |
| chr15 | 91358280 | 91358560 |
| chr15 | 93331223 | 93331343 |

|       |           |           |
|-------|-----------|-----------|
| chr15 | 96338303  | 96338423  |
| chr15 | 99192759  | 99192959  |
| chr15 | 99230203  | 99230323  |
| chr15 | 99250763  | 99251363  |
| chr15 | 99256510  | 99256630  |
| chr15 | 99263214  | 99263334  |
| chr15 | 99284620  | 99284740  |
| chr15 | 99301475  | 99301595  |
| chr15 | 99341914  | 99342034  |
| chr15 | 99364310  | 99364430  |
| chr15 | 99409488  | 99409608  |
| chr15 | 99429402  | 99429522  |
| chr15 | 99434529  | 99434889  |
| chr15 | 99439919  | 99440199  |
| chr15 | 99442637  | 99442917  |
| chr15 | 99451900  | 99452140  |
| chr15 | 99453503  | 99453623  |
| chr15 | 99454486  | 99454726  |
| chr15 | 99456251  | 99456531  |
| chr15 | 99459136  | 99459416  |
| chr15 | 99459882  | 99460122  |
| chr15 | 99465358  | 99465678  |
| chr15 | 99467052  | 99467292  |
| chr15 | 99467693  | 99467973  |
| chr15 | 99472717  | 99472957  |
| chr15 | 99473398  | 99473598  |
| chr15 | 99478027  | 99478307  |
| chr15 | 99478479  | 99478719  |
| chr15 | 99482369  | 99482649  |
| chr15 | 99486096  | 99486336  |
| chr15 | 99491749  | 99492105  |
| chr15 | 99500260  | 99500700  |
| chr15 | 99504377  | 99504497  |
| chr15 | 102341944 | 102342064 |
| chr16 | 105260    | 105380    |
| chr16 | 3108972   | 3109092   |
| chr16 | 3777716   | 3779876   |
| chr16 | 3780270   | 3780390   |
| chr16 | 3781173   | 3781493   |
| chr16 | 3781717   | 3781997   |
| chr16 | 3785980   | 3786260   |
| chr16 | 3786593   | 3786914   |
| chr16 | 3788516   | 3788716   |

|       |         |         |
|-------|---------|---------|
| chr16 | 3789529 | 3789769 |
| chr16 | 3790246 | 3790594 |
| chr16 | 3794848 | 3795008 |
| chr16 | 3795236 | 3795396 |
| chr16 | 3795885 | 3796005 |
| chr16 | 3799575 | 3799735 |
| chr16 | 3801667 | 3801867 |
| chr16 | 3807232 | 3807432 |
| chr16 | 3807809 | 3808049 |
| chr16 | 3808813 | 3809013 |
| chr16 | 3811495 | 3811615 |
| chr16 | 3817675 | 3817955 |
| chr16 | 3819124 | 3819404 |
| chr16 | 3820558 | 3820998 |
| chr16 | 3823704 | 3823944 |
| chr16 | 3824511 | 3824751 |
| chr16 | 3827555 | 3827715 |
| chr16 | 3827957 | 3828237 |
| chr16 | 3828287 | 3828407 |
| chr16 | 3828659 | 3828859 |
| chr16 | 3830685 | 3830925 |
| chr16 | 3831155 | 3831355 |
| chr16 | 3832410 | 3832530 |
| chr16 | 3832665 | 3832945 |
| chr16 | 3838201 | 3838425 |
| chr16 | 3841938 | 3842138 |
| chr16 | 3843366 | 3843646 |
| chr16 | 3860551 | 3860831 |
| chr16 | 3865049 | 3865169 |
| chr16 | 3867020 | 3867140 |
| chr16 | 3871225 | 3871345 |
| chr16 | 3900293 | 3901013 |
| chr16 | 3922931 | 3923051 |
| chr16 | 3929774 | 3929974 |
| chr16 | 6110487 | 6110607 |
| chr16 | 8987807 | 8988007 |
| chr16 | 8988127 | 8988247 |
| chr16 | 8988351 | 8988551 |
| chr16 | 8988596 | 8988756 |
| chr16 | 8988847 | 8989047 |
| chr16 | 8989448 | 8989648 |
| chr16 | 8990805 | 8991005 |
| chr16 | 8992175 | 8992335 |



|       |          |          |
|-------|----------|----------|
| chr16 | 8992341  | 8992541  |
| chr16 | 8992767  | 8992887  |
| chr16 | 8992931  | 8993091  |
| chr16 | 8993417  | 8993657  |
| chr16 | 8994336  | 8994536  |
| chr16 | 8994800  | 8995144  |
| chr16 | 8995891  | 8996091  |
| chr16 | 8996188  | 8996418  |
| chr16 | 8996739  | 8996859  |
| chr16 | 8997071  | 8997311  |
| chr16 | 8998236  | 8998476  |
| chr16 | 8998995  | 8999235  |
| chr16 | 8999487  | 8999607  |
| chr16 | 8999923  | 9000163  |
| chr16 | 9000240  | 9000480  |
| chr16 | 9002152  | 9002352  |
| chr16 | 9004542  | 9004742  |
| chr16 | 9008405  | 9008525  |
| chr16 | 9009055  | 9009441  |
| chr16 | 9010305  | 9010465  |
| chr16 | 9010827  | 9011067  |
| chr16 | 9012841  | 9013041  |
| chr16 | 9014159  | 9014444  |
| chr16 | 9014744  | 9014864  |
| chr16 | 9014962  | 9015202  |
| chr16 | 9017030  | 9017310  |
| chr16 | 9023296  | 9023496  |
| chr16 | 9024101  | 9024301  |
| chr16 | 9027368  | 9027488  |
| chr16 | 9030354  | 9030554  |
| chr16 | 9035063  | 9035183  |
| chr16 | 9035323  | 9035443  |
| chr16 | 9050238  | 9050358  |
| chr16 | 9056250  | 9056450  |
| chr16 | 9057022  | 9057182  |
| chr16 | 9127446  | 9127566  |
| chr16 | 9653995  | 9654115  |
| chr16 | 12157840 | 12157960 |
| chr16 | 15166831 | 15166951 |
| chr16 | 18799555 | 18799675 |
| chr16 | 21951355 | 21951475 |
| chr16 | 24958925 | 24959045 |
| chr16 | 27963289 | 27963409 |

|       |          |          |
|-------|----------|----------|
| chr16 | 28889855 | 28890135 |
| chr16 | 28890328 | 28890528 |
| chr16 | 28890762 | 28890962 |
| chr16 | 28892167 | 28892407 |
| chr16 | 28893720 | 28893960 |
| chr16 | 28895835 | 28896035 |
| chr16 | 28898452 | 28898652 |
| chr16 | 28898734 | 28899054 |
| chr16 | 28900050 | 28900330 |
| chr16 | 28905419 | 28905619 |
| chr16 | 28905756 | 28905996 |
| chr16 | 28906088 | 28906328 |
| chr16 | 28909263 | 28909503 |
| chr16 | 28909542 | 28909782 |
| chr16 | 28911889 | 28912249 |
| chr16 | 28913153 | 28913433 |
| chr16 | 28913485 | 28913725 |
| chr16 | 28913843 | 28914043 |
| chr16 | 28914045 | 28914285 |
| chr16 | 28914289 | 28914529 |
| chr16 | 28914582 | 28914822 |
| chr16 | 28914922 | 28915122 |
| chr16 | 28915433 | 28915593 |
| chr16 | 28915670 | 28915830 |
| chr16 | 30964880 | 30965000 |
| chr16 | 34197432 | 34197552 |
| chr16 | 46723538 | 46723658 |
| chr16 | 47276777 | 47276897 |
| chr16 | 47754505 | 47754625 |
| chr16 | 48358307 | 48358427 |
| chr16 | 48867487 | 48867607 |
| chr16 | 49364995 | 49365115 |
| chr16 | 49733003 | 49733123 |
| chr16 | 49874690 | 49874810 |
| chr16 | 50376735 | 50376855 |
| chr16 | 50783601 | 50784121 |
| chr16 | 50785505 | 50785825 |
| chr16 | 50787086 | 50787206 |
| chr16 | 50787422 | 50787542 |
| chr16 | 50788182 | 50788382 |
| chr16 | 50791189 | 50791309 |
| chr16 | 50792207 | 50792327 |
| chr16 | 50803569 | 50803721 |

|       |          |          |
|-------|----------|----------|
| chr16 | 50807495 | 50807615 |
| chr16 | 50807718 | 50807838 |
| chr16 | 50808980 | 50809180 |
| chr16 | 50810034 | 50810234 |
| chr16 | 50811693 | 50811893 |
| chr16 | 50813565 | 50813965 |
| chr16 | 50815099 | 50815379 |
| chr16 | 50816186 | 50816426 |
| chr16 | 50817158 | 50817278 |
| chr16 | 50818180 | 50818420 |
| chr16 | 50819051 | 50819171 |
| chr16 | 50819505 | 50819625 |
| chr16 | 50819849 | 50819969 |
| chr16 | 50820711 | 50820911 |
| chr16 | 50821649 | 50821809 |
| chr16 | 50822903 | 50823023 |
| chr16 | 50825414 | 50825654 |
| chr16 | 50826461 | 50826661 |
| chr16 | 50827415 | 50827660 |
| chr16 | 50828115 | 50828395 |
| chr16 | 50829406 | 50829566 |
| chr16 | 50830186 | 50830466 |
| chr16 | 50831195 | 50831315 |
| chr16 | 50834641 | 50834841 |
| chr16 | 50900250 | 50900370 |
| chr16 | 51428895 | 51429015 |
| chr16 | 51920030 | 51920150 |
| chr16 | 52742198 | 52742318 |
| chr16 | 52919505 | 52919625 |
| chr16 | 53489644 | 53489764 |
| chr16 | 53981360 | 53981480 |
| chr16 | 54469574 | 54469694 |
| chr16 | 55033633 | 55033753 |
| chr16 | 55527817 | 55527937 |
| chr16 | 55778085 | 55778205 |
| chr16 | 56038407 | 56038527 |
| chr16 | 56510238 | 56510358 |
| chr16 | 57012279 | 57012399 |
| chr16 | 58803486 | 58803606 |
| chr16 | 61807196 | 61807316 |
| chr16 | 64847480 | 64847600 |
| chr16 | 68307387 | 68307507 |
| chr16 | 71319586 | 71319706 |

|       |          |          |
|-------|----------|----------|
| chr16 | 72821042 | 72821602 |
| chr16 | 72821642 | 72822002 |
| chr16 | 72822037 | 72822557 |
| chr16 | 72822567 | 72822847 |
| chr16 | 72827130 | 72831370 |
| chr16 | 72831398 | 72832638 |
| chr16 | 72833856 | 72834096 |
| chr16 | 72845455 | 72845695 |
| chr16 | 72845750 | 72845990 |
| chr16 | 72863617 | 72863817 |
| chr16 | 72906998 | 72907118 |
| chr16 | 72923605 | 72923885 |
| chr16 | 72931025 | 72931145 |
| chr16 | 72981170 | 72981290 |
| chr16 | 72984355 | 72984875 |
| chr16 | 72991304 | 72991704 |
| chr16 | 72991714 | 72992594 |
| chr16 | 72992659 | 72994059 |
| chr16 | 73029100 | 73029220 |
| chr16 | 73045789 | 73045909 |
| chr16 | 73073748 | 73073868 |
| chr16 | 73612059 | 73612179 |
| chr16 | 74125305 | 74125425 |
| chr16 | 74348983 | 74349103 |
| chr16 | 74686105 | 74686225 |
| chr16 | 75231624 | 75231744 |
| chr16 | 75717869 | 75717989 |
| chr16 | 76224988 | 76225108 |
| chr16 | 76629599 | 76629719 |
| chr16 | 77134182 | 77134302 |
| chr16 | 77353913 | 77354033 |
| chr16 | 77637031 | 77637151 |
| chr16 | 78133610 | 78133850 |
| chr16 | 78142251 | 78142451 |
| chr16 | 78143546 | 78143783 |
| chr16 | 78148821 | 78149101 |
| chr16 | 78198012 | 78198252 |
| chr16 | 78312446 | 78312606 |
| chr16 | 78420700 | 78420900 |
| chr16 | 78458739 | 78458979 |
| chr16 | 78466356 | 78466676 |
| chr16 | 78623946 | 78624066 |
| chr16 | 78790655 | 78790855 |

|       |          |          |
|-------|----------|----------|
| chr16 | 79116818 | 79116938 |
| chr16 | 79245487 | 79246047 |
| chr16 | 79610275 | 79610395 |
| chr16 | 79619721 | 79619921 |
| chr16 | 79619985 | 79620105 |
| chr16 | 79620377 | 79620497 |
| chr16 | 79620996 | 79621116 |
| chr16 | 79623024 | 79623144 |
| chr16 | 79624788 | 79624908 |
| chr16 | 79625506 | 79625626 |
| chr16 | 79626745 | 79626865 |
| chr16 | 79627004 | 79627124 |
| chr16 | 79627221 | 79627341 |
| chr16 | 79628055 | 79628295 |
| chr16 | 79628303 | 79628503 |
| chr16 | 79628741 | 79628861 |
| chr16 | 79629731 | 79629851 |
| chr16 | 79632377 | 79632497 |
| chr16 | 79632658 | 79633818 |
| chr16 | 80111081 | 80111201 |
| chr16 | 80356988 | 80357108 |
| chr16 | 80631360 | 80631480 |
| chr16 | 81143395 | 81143515 |
| chr16 | 81644228 | 81644348 |
| chr16 | 82135450 | 82135570 |
| chr16 | 82637697 | 82637817 |
| chr16 | 83145289 | 83145409 |
| chr16 | 83377141 | 83377261 |
| chr16 | 83643873 | 83643993 |
| chr16 | 84132472 | 84132592 |
| chr16 | 84657050 | 84657170 |
| chr16 | 86384877 | 86384997 |
| chr16 | 89386748 | 89386868 |
| chr16 | 89804942 | 89805182 |
| chr16 | 89805235 | 89805435 |
| chr16 | 89805478 | 89805758 |
| chr16 | 89805823 | 89806023 |
| chr16 | 89806282 | 89806522 |
| chr16 | 89807142 | 89807342 |
| chr16 | 89809156 | 89809396 |
| chr16 | 89811302 | 89811542 |
| chr16 | 89812923 | 89813163 |
| chr16 | 89813188 | 89813348 |

|       |          |          |
|-------|----------|----------|
| chr16 | 89815000 | 89815240 |
| chr16 | 89816083 | 89816363 |
| chr16 | 89818487 | 89818687 |
| chr16 | 89824950 | 89825190 |
| chr16 | 89828313 | 89828513 |
| chr16 | 89831245 | 89831525 |
| chr16 | 89833496 | 89833696 |
| chr16 | 89836218 | 89836458 |
| chr16 | 89836520 | 89836720 |
| chr16 | 89836906 | 89837106 |
| chr16 | 89838033 | 89838273 |
| chr16 | 89839615 | 89839855 |
| chr16 | 89842086 | 89842286 |
| chr16 | 89845153 | 89845480 |
| chr16 | 89846220 | 89846420 |
| chr16 | 89849216 | 89849562 |
| chr16 | 89851196 | 89851436 |
| chr16 | 89857757 | 89857997 |
| chr16 | 89858265 | 89858545 |
| chr16 | 89858816 | 89859016 |
| chr16 | 89862249 | 89862489 |
| chr16 | 89865396 | 89865706 |
| chr16 | 89865949 | 89866109 |
| chr16 | 89869607 | 89869807 |
| chr16 | 89871623 | 89871863 |
| chr16 | 89874597 | 89874797 |
| chr16 | 89877062 | 89877262 |
| chr16 | 89877267 | 89877547 |
| chr16 | 89880874 | 89881074 |
| chr16 | 89882219 | 89882459 |
| chr16 | 89882883 | 89883083 |
| chr17 | 76450    | 76570    |
| chr17 | 598224   | 598344   |
| chr17 | 1098672  | 1098792  |
| chr17 | 1588899  | 1589019  |
| chr17 | 2095651  | 2095771  |
| chr17 | 2599211  | 2599331  |
| chr17 | 3093818  | 3093938  |
| chr17 | 3118321  | 3118441  |
| chr17 | 3480386  | 3480506  |
| chr17 | 3615768  | 3615888  |
| chr17 | 3822775  | 3822975  |
| chr17 | 3827987  | 3828187  |

|       |         |         |
|-------|---------|---------|
| chr17 | 3828603 | 3828803 |
| chr17 | 3831223 | 3831383 |
| chr17 | 3831450 | 3831690 |
| chr17 | 3831895 | 3832135 |
| chr17 | 3832560 | 3832800 |
| chr17 | 3833572 | 3833812 |
| chr17 | 3838428 | 3838628 |
| chr17 | 3839541 | 3839781 |
| chr17 | 3840679 | 3840959 |
| chr17 | 3844252 | 3844612 |
| chr17 | 3844718 | 3844958 |
| chr17 | 3845842 | 3846082 |
| chr17 | 3846630 | 3846870 |
| chr17 | 3847928 | 3848168 |
| chr17 | 3848314 | 3848514 |
| chr17 | 3850656 | 3851176 |
| chr17 | 3853747 | 3854126 |
| chr17 | 3854506 | 3854746 |
| chr17 | 3854806 | 3855046 |
| chr17 | 3856581 | 3856781 |
| chr17 | 3856895 | 3857095 |
| chr17 | 3867472 | 3867632 |
| chr17 | 4638502 | 4638622 |
| chr17 | 5113362 | 5113482 |
| chr17 | 5616518 | 5616638 |
| chr17 | 6114812 | 6114933 |
| chr17 | 6593861 | 6593981 |
| chr17 | 7101230 | 7101350 |
| chr17 | 7565214 | 7565374 |
| chr17 | 7566342 | 7566462 |
| chr17 | 7569442 | 7569757 |
| chr17 | 7570167 | 7570287 |
| chr17 | 7570755 | 7570995 |
| chr17 | 7571391 | 7571511 |
| chr17 | 7572867 | 7573067 |
| chr17 | 7573879 | 7574079 |
| chr17 | 7576480 | 7576740 |
| chr17 | 7576809 | 7577206 |
| chr17 | 7577296 | 7577653 |
| chr17 | 7578132 | 7578725 |
| chr17 | 7579310 | 7579590 |
| chr17 | 7579610 | 7579955 |
| chr17 | 7614538 | 7614658 |

|       |          |          |
|-------|----------|----------|
| chr17 | 7748820  | 7749060  |
| chr17 | 7749138  | 7749338  |
| chr17 | 7749385  | 7749625  |
| chr17 | 7749663  | 7750375  |
| chr17 | 7750416  | 7750776  |
| chr17 | 7750854  | 7753054  |
| chr17 | 7753081  | 7753321  |
| chr17 | 7753342  | 7753542  |
| chr17 | 7754321  | 7754561  |
| chr17 | 7754599  | 7754911  |
| chr17 | 7754919  | 7755159  |
| chr17 | 7755225  | 7755700  |
| chr17 | 7755763  | 7756003  |
| chr17 | 7756260  | 7756500  |
| chr17 | 7756523  | 7756843  |
| chr17 | 8090847  | 8090967  |
| chr17 | 8595032  | 8595152  |
| chr17 | 9095621  | 9095741  |
| chr17 | 9120810  | 9120930  |
| chr17 | 9613623  | 9613743  |
| chr17 | 10614381 | 10614501 |
| chr17 | 11135641 | 11135761 |
| chr17 | 11501803 | 11502243 |
| chr17 | 11511403 | 11511683 |
| chr17 | 11513671 | 11513911 |
| chr17 | 11514919 | 11515199 |
| chr17 | 11515802 | 11516042 |
| chr17 | 11520713 | 11520953 |
| chr17 | 11522861 | 11523101 |
| chr17 | 11532677 | 11532957 |
| chr17 | 11535861 | 11536061 |
| chr17 | 11539905 | 11540145 |
| chr17 | 11543543 | 11543743 |
| chr17 | 11547901 | 11548061 |
| chr17 | 11550331 | 11550571 |
| chr17 | 11554373 | 11554653 |
| chr17 | 11556058 | 11556338 |
| chr17 | 11568097 | 11568337 |
| chr17 | 11572338 | 11572618 |
| chr17 | 11572678 | 11573118 |
| chr17 | 11583064 | 11583304 |
| chr17 | 11583982 | 11584262 |
| chr17 | 11592877 | 11593757 |



|       |          |          |
|-------|----------|----------|
| chr17 | 11597129 | 11597369 |
| chr17 | 11597580 | 11597820 |
| chr17 | 11603003 | 11603243 |
| chr17 | 11604381 | 11604621 |
| chr17 | 11607519 | 11607759 |
| chr17 | 11608281 | 11608561 |
| chr17 | 11622608 | 11622848 |
| chr17 | 11631086 | 11631286 |
| chr17 | 11642155 | 11642395 |
| chr17 | 11645440 | 11645680 |
| chr17 | 11648097 | 11648417 |
| chr17 | 11650857 | 11651097 |
| chr17 | 11656093 | 11656333 |
| chr17 | 11659838 | 11660038 |
| chr17 | 11660815 | 11661055 |
| chr17 | 11666703 | 11666983 |
| chr17 | 11671716 | 11671996 |
| chr17 | 11672422 | 11672662 |
| chr17 | 11684268 | 11684548 |
| chr17 | 11686913 | 11687113 |
| chr17 | 11687616 | 11687856 |
| chr17 | 11696760 | 11697040 |
| chr17 | 11700871 | 11701151 |
| chr17 | 11710989 | 11711269 |
| chr17 | 11713504 | 11713744 |
| chr17 | 11725187 | 11725427 |
| chr17 | 11725695 | 11725975 |
| chr17 | 11726114 | 11726354 |
| chr17 | 11737944 | 11738224 |
| chr17 | 11757312 | 11757752 |
| chr17 | 11772410 | 11772610 |
| chr17 | 11774868 | 11775148 |
| chr17 | 11778263 | 11778503 |
| chr17 | 11783335 | 11783575 |
| chr17 | 11784507 | 11784747 |
| chr17 | 11786844 | 11787124 |
| chr17 | 11790091 | 11790331 |
| chr17 | 11795038 | 11795318 |
| chr17 | 11797631 | 11797871 |
| chr17 | 11805992 | 11806272 |
| chr17 | 11808931 | 11809171 |
| chr17 | 11827074 | 11827314 |
| chr17 | 11833176 | 11833416 |

|       |          |          |
|-------|----------|----------|
| chr17 | 11835286 | 11835566 |
| chr17 | 11837152 | 11837432 |
| chr17 | 11840613 | 11840893 |
| chr17 | 11845570 | 11845850 |
| chr17 | 11865178 | 11865578 |
| chr17 | 11872610 | 11872850 |
| chr17 | 11924041 | 11924401 |
| chr17 | 11935518 | 11935678 |
| chr17 | 11956932 | 11957052 |
| chr17 | 11958136 | 11958376 |
| chr17 | 11984619 | 11984899 |
| chr17 | 11985514 | 11985634 |
| chr17 | 11998673 | 11999071 |
| chr17 | 12011046 | 12011286 |
| chr17 | 12013637 | 12013797 |
| chr17 | 12016493 | 12016733 |
| chr17 | 12028549 | 12028749 |
| chr17 | 12031049 | 12031169 |
| chr17 | 12032389 | 12032669 |
| chr17 | 12043098 | 12043258 |
| chr17 | 12043513 | 12043633 |
| chr17 | 12044400 | 12044640 |
| chr17 | 12134126 | 12134246 |
| chr17 | 15135070 | 15135190 |
| chr17 | 15935583 | 15935823 |
| chr17 | 15938028 | 15938308 |
| chr17 | 15942717 | 15942997 |
| chr17 | 15943701 | 15943861 |
| chr17 | 15950195 | 15950475 |
| chr17 | 15952090 | 15952370 |
| chr17 | 15960799 | 15961079 |
| chr17 | 15961159 | 15961439 |
| chr17 | 15961728 | 15961968 |
| chr17 | 15964701 | 15965221 |
| chr17 | 15965361 | 15965641 |
| chr17 | 15967281 | 15967441 |
| chr17 | 15967447 | 15967607 |
| chr17 | 15968118 | 15968398 |
| chr17 | 15968783 | 15969023 |
| chr17 | 15971181 | 15971461 |
| chr17 | 15973458 | 15973858 |
| chr17 | 15974706 | 15974986 |
| chr17 | 15975400 | 15975600 |

|       |          |          |
|-------|----------|----------|
| chr17 | 15976672 | 15976952 |
| chr17 | 15978791 | 15979071 |
| chr17 | 15983207 | 15983447 |
| chr17 | 15983660 | 15984100 |
| chr17 | 15989535 | 15989815 |
| chr17 | 15990432 | 15990712 |
| chr17 | 15995150 | 15995390 |
| chr17 | 16001625 | 16001865 |
| chr17 | 16004541 | 16005141 |
| chr17 | 16012042 | 16012282 |
| chr17 | 16021151 | 16021391 |
| chr17 | 16022667 | 16022867 |
| chr17 | 16024354 | 16024594 |
| chr17 | 16029482 | 16029682 |
| chr17 | 16040543 | 16040783 |
| chr17 | 16041418 | 16041578 |
| chr17 | 16042301 | 16042581 |
| chr17 | 16046864 | 16047064 |
| chr17 | 16049635 | 16049915 |
| chr17 | 16052697 | 16052897 |
| chr17 | 16054836 | 16054996 |
| chr17 | 16055205 | 16055365 |
| chr17 | 16056600 | 16056760 |
| chr17 | 16062010 | 16062250 |
| chr17 | 16068263 | 16068503 |
| chr17 | 16075092 | 16075332 |
| chr17 | 16089814 | 16090054 |
| chr17 | 16097709 | 16097949 |
| chr17 | 18135693 | 18135813 |
| chr17 | 21151046 | 21151166 |
| chr17 | 25402103 | 25402223 |
| chr17 | 28434908 | 28435028 |
| chr17 | 28731354 | 28731474 |
| chr17 | 29422166 | 29422446 |
| chr17 | 29423928 | 29424048 |
| chr17 | 29461838 | 29461958 |
| chr17 | 29473292 | 29473412 |
| chr17 | 29482817 | 29482937 |
| chr17 | 29482952 | 29483192 |
| chr17 | 29485969 | 29486169 |
| chr17 | 29490158 | 29490438 |
| chr17 | 29496861 | 29497061 |
| chr17 | 29508393 | 29508553 |

|       |          |          |
|-------|----------|----------|
| chr17 | 29508685 | 29508845 |
| chr17 | 29509484 | 29509724 |
| chr17 | 29519995 | 29520115 |
| chr17 | 29527386 | 29527666 |
| chr17 | 29527995 | 29528235 |
| chr17 | 29528385 | 29528545 |
| chr17 | 29533203 | 29533443 |
| chr17 | 29541415 | 29541655 |
| chr17 | 29545979 | 29546179 |
| chr17 | 29548817 | 29549057 |
| chr17 | 29550403 | 29550643 |
| chr17 | 29552070 | 29552310 |
| chr17 | 29553437 | 29553717 |
| chr17 | 29554192 | 29554352 |
| chr17 | 29554482 | 29554682 |
| chr17 | 29556022 | 29556502 |
| chr17 | 29556802 | 29557042 |
| chr17 | 29557218 | 29557458 |
| chr17 | 29557801 | 29558001 |
| chr17 | 29559048 | 29559248 |
| chr17 | 29559668 | 29559948 |
| chr17 | 29560005 | 29560245 |
| chr17 | 29562569 | 29562849 |
| chr17 | 29562887 | 29563087 |
| chr17 | 29575949 | 29576189 |
| chr17 | 29578299 | 29578419 |
| chr17 | 29579906 | 29580066 |
| chr17 | 29584620 | 29584820 |
| chr17 | 29585320 | 29585560 |
| chr17 | 29585998 | 29586198 |
| chr17 | 29587339 | 29587579 |
| chr17 | 29588681 | 29588921 |
| chr17 | 29592201 | 29592401 |
| chr17 | 29612349 | 29612469 |
| chr17 | 29626475 | 29626675 |
| chr17 | 29644791 | 29644911 |
| chr17 | 29652833 | 29653273 |
| chr17 | 29654506 | 29654866 |
| chr17 | 29657294 | 29657534 |
| chr17 | 29661634 | 29661794 |
| chr17 | 29661812 | 29662092 |
| chr17 | 29663300 | 29663540 |
| chr17 | 29663652 | 29663932 |

|       |          |          |
|-------|----------|----------|
| chr17 | 29664372 | 29664612 |
| chr17 | 29664786 | 29664946 |
| chr17 | 29664968 | 29665208 |
| chr17 | 29665672 | 29665872 |
| chr17 | 29667472 | 29667712 |
| chr17 | 29669969 | 29670209 |
| chr17 | 29676083 | 29676323 |
| chr17 | 29677148 | 29677388 |
| chr17 | 29679185 | 29679473 |
| chr17 | 29683418 | 29683658 |
| chr17 | 29683922 | 29684162 |
| chr17 | 29684236 | 29684436 |
| chr17 | 29685448 | 29685688 |
| chr17 | 29685929 | 29686089 |
| chr17 | 29687496 | 29687736 |
| chr17 | 29694189 | 29694349 |
| chr17 | 29700981 | 29701221 |
| chr17 | 29703941 | 29704061 |
| chr17 | 29705847 | 29706007 |
| chr17 | 31438398 | 31438518 |
| chr17 | 34444060 | 34444180 |
| chr17 | 37453234 | 37453354 |
| chr17 | 37884174 | 37884294 |
| chr17 | 37895472 | 37895592 |
| chr17 | 37907419 | 37907539 |
| chr17 | 37916239 | 37916359 |
| chr17 | 37922014 | 37922774 |
| chr17 | 37925833 | 37925953 |
| chr17 | 37933841 | 37934081 |
| chr17 | 37938034 | 37938154 |
| chr17 | 37943671 | 37943791 |
| chr17 | 37944448 | 37944688 |
| chr17 | 37947612 | 37947892 |
| chr17 | 37948895 | 37949215 |
| chr17 | 37949864 | 37949984 |
| chr17 | 37957257 | 37957377 |
| chr17 | 37964376 | 37964496 |
| chr17 | 37970305 | 37970425 |
| chr17 | 37985565 | 37985805 |
| chr17 | 37988297 | 37988457 |
| chr17 | 38004414 | 38004534 |
| chr17 | 38020275 | 38020475 |
| chr17 | 38040703 | 38040823 |

|       |          |          |
|-------|----------|----------|
| chr17 | 38045665 | 38045785 |
| chr17 | 38051288 | 38051408 |
| chr17 | 38064227 | 38064347 |
| chr17 | 38069889 | 38070009 |
| chr17 | 40498213 | 40498333 |
| chr17 | 41197636 | 41197876 |
| chr17 | 41199609 | 41199769 |
| chr17 | 41201094 | 41201254 |
| chr17 | 41201993 | 41202193 |
| chr17 | 41203026 | 41203186 |
| chr17 | 41209010 | 41209210 |
| chr17 | 41215289 | 41215449 |
| chr17 | 41215849 | 41216009 |
| chr17 | 41219568 | 41219768 |
| chr17 | 41222939 | 41223259 |
| chr17 | 41226302 | 41226582 |
| chr17 | 41228447 | 41228687 |
| chr17 | 41231303 | 41231463 |
| chr17 | 41234366 | 41234646 |
| chr17 | 41242904 | 41243104 |
| chr17 | 41243444 | 41246884 |
| chr17 | 41247820 | 41247980 |
| chr17 | 41249203 | 41249363 |
| chr17 | 41251744 | 41251944 |
| chr17 | 41256088 | 41256328 |
| chr17 | 41256828 | 41257028 |
| chr17 | 41258431 | 41258591 |
| chr17 | 41262494 | 41262654 |
| chr17 | 41267689 | 41267849 |
| chr17 | 41275993 | 41276153 |
| chr17 | 41277100 | 41277300 |
| chr17 | 43341944 | 43342224 |
| chr17 | 43342459 | 43342699 |
| chr17 | 43343835 | 43344115 |
| chr17 | 43344391 | 43344631 |
| chr17 | 43344749 | 43345149 |
| chr17 | 43347714 | 43347994 |
| chr17 | 43348280 | 43348600 |
| chr17 | 43350801 | 43351041 |
| chr17 | 43351435 | 43351675 |
| chr17 | 43351775 | 43352015 |
| chr17 | 43362127 | 43362367 |
| chr17 | 43363784 | 43364424 |

|       |          |          |
|-------|----------|----------|
| chr17 | 43364504 | 43364744 |
| chr17 | 43366536 | 43366736 |
| chr17 | 43367843 | 43368123 |
| chr17 | 43513381 | 43513501 |
| chr17 | 46521968 | 46522088 |
| chr17 | 47677671 | 47677951 |
| chr17 | 47679157 | 47679437 |
| chr17 | 47684552 | 47684792 |
| chr17 | 47685183 | 47685343 |
| chr17 | 47688590 | 47688870 |
| chr17 | 47695816 | 47696016 |
| chr17 | 47696286 | 47696526 |
| chr17 | 47696531 | 47696811 |
| chr17 | 47697931 | 47698131 |
| chr17 | 47699248 | 47699488 |
| chr17 | 47699536 | 47699696 |
| chr17 | 47700033 | 47700233 |
| chr17 | 49537702 | 49537822 |
| chr17 | 52548065 | 52548185 |
| chr17 | 55550872 | 55550992 |
| chr17 | 56082290 | 56082490 |
| chr17 | 56082723 | 56083003 |
| chr17 | 56083100 | 56083340 |
| chr17 | 56083655 | 56083935 |
| chr17 | 56084259 | 56084539 |
| chr17 | 58677751 | 58678271 |
| chr17 | 58678886 | 58679006 |
| chr17 | 58700855 | 58701135 |
| chr17 | 58711155 | 58711395 |
| chr17 | 58725227 | 58725467 |
| chr17 | 58733940 | 58734220 |
| chr17 | 58734228 | 58734388 |
| chr17 | 58740334 | 58740934 |
| chr17 | 59760638 | 59761518 |
| chr17 | 59763181 | 59763541 |
| chr17 | 59770731 | 59770931 |
| chr17 | 59793204 | 59793444 |
| chr17 | 59820314 | 59820554 |
| chr17 | 59821732 | 59822012 |
| chr17 | 59853702 | 59853982 |
| chr17 | 59857545 | 59857825 |
| chr17 | 59858143 | 59858423 |
| chr17 | 59861567 | 59861847 |

|       |          |          |
|-------|----------|----------|
| chr17 | 59870903 | 59871143 |
| chr17 | 59876440 | 59876680 |
| chr17 | 59878584 | 59878864 |
| chr17 | 59885812 | 59886132 |
| chr17 | 59924401 | 59924641 |
| chr17 | 59926433 | 59926673 |
| chr17 | 59934365 | 59934645 |
| chr17 | 59937092 | 59937332 |
| chr17 | 59938753 | 59938953 |
| chr17 | 61805341 | 61805461 |
| chr17 | 62006534 | 62006894 |
| chr17 | 62007088 | 62007288 |
| chr17 | 62007429 | 62007749 |
| chr17 | 62008641 | 62008801 |
| chr17 | 62009507 | 62009667 |
| chr17 | 62121333 | 62121573 |
| chr17 | 62122153 | 62122353 |
| chr17 | 62122660 | 62122900 |
| chr17 | 62125161 | 62125401 |
| chr17 | 62126348 | 62126628 |
| chr17 | 62130119 | 62130359 |
| chr17 | 62130581 | 62130781 |
| chr17 | 62131584 | 62131824 |
| chr17 | 62132042 | 62132242 |
| chr17 | 62132959 | 62133381 |
| chr17 | 62135137 | 62135377 |
| chr17 | 62137768 | 62138008 |
| chr17 | 62141288 | 62141568 |
| chr17 | 62142507 | 62142707 |
| chr17 | 62144001 | 62144321 |
| chr17 | 62145480 | 62145720 |
| chr17 | 62149281 | 62149521 |
| chr17 | 62152430 | 62152630 |
| chr17 | 62156957 | 62157157 |
| chr17 | 62158071 | 62158231 |
| chr17 | 62175420 | 62175660 |
| chr17 | 62207165 | 62207556 |
| chr17 | 64831597 | 64831717 |
| chr17 | 67857570 | 67857690 |
| chr17 | 70117507 | 70117987 |
| chr17 | 70118846 | 70119126 |
| chr17 | 70119666 | 70120026 |
| chr17 | 70120117 | 70120557 |



|       |          |          |
|-------|----------|----------|
| chr17 | 70864365 | 70864485 |
| chr17 | 73911655 | 73911775 |
| chr17 | 74732234 | 74732554 |
| chr17 | 74732861 | 74733261 |
| chr17 | 76923366 | 76923486 |
| chr17 | 78237428 | 78237628 |
| chr17 | 78246981 | 78247261 |
| chr17 | 78252495 | 78252775 |
| chr17 | 78261435 | 78262192 |
| chr17 | 78262372 | 78262612 |
| chr17 | 78263406 | 78263686 |
| chr17 | 78264307 | 78264587 |
| chr17 | 78265406 | 78265646 |
| chr17 | 78268500 | 78268820 |
| chr17 | 78269344 | 78269624 |
| chr17 | 78272099 | 78272339 |
| chr17 | 78280039 | 78280279 |
| chr17 | 78280864 | 78281064 |
| chr17 | 78282754 | 78283034 |
| chr17 | 78286749 | 78287029 |
| chr17 | 78290932 | 78291132 |
| chr17 | 78292974 | 78293294 |
| chr17 | 78298773 | 78299053 |
| chr17 | 78301562 | 78301842 |
| chr17 | 78302062 | 78302342 |
| chr17 | 78305778 | 78306458 |
| chr17 | 78307847 | 78308127 |
| chr17 | 78309932 | 78310332 |
| chr17 | 78311315 | 78311854 |
| chr17 | 78312978 | 78314178 |
| chr17 | 78316908 | 78317148 |
| chr17 | 78317595 | 78317875 |
| chr17 | 78318461 | 78322101 |
| chr17 | 78323517 | 78323757 |
| chr17 | 78324048 | 78324248 |
| chr17 | 78325463 | 78325623 |
| chr17 | 78326679 | 78326919 |
| chr17 | 78327248 | 78327528 |
| chr17 | 78327752 | 78328032 |
| chr17 | 78328188 | 78328428 |
| chr17 | 78332063 | 78332303 |
| chr17 | 78333793 | 78334073 |
| chr17 | 78335470 | 78335750 |

|       |          |          |
|-------|----------|----------|
| chr17 | 78336887 | 78337127 |
| chr17 | 78337379 | 78337619 |
| chr17 | 78338172 | 78338412 |
| chr17 | 78341477 | 78341717 |
| chr17 | 78341731 | 78341971 |
| chr17 | 78343246 | 78343717 |
| chr17 | 78345609 | 78345849 |
| chr17 | 78346307 | 78346547 |
| chr17 | 78346749 | 78346989 |
| chr17 | 78348203 | 78348443 |
| chr17 | 78349494 | 78349734 |
| chr17 | 78350081 | 78350361 |
| chr17 | 78350622 | 78350822 |
| chr17 | 78351498 | 78351658 |
| chr17 | 78353366 | 78353566 |
| chr17 | 78354568 | 78354848 |
| chr17 | 78355316 | 78355556 |
| chr17 | 78356160 | 78356320 |
| chr17 | 78356724 | 78356924 |
| chr17 | 78357462 | 78357742 |
| chr17 | 78358784 | 78359024 |
| chr17 | 78359279 | 78359479 |
| chr17 | 78360019 | 78360259 |
| chr17 | 78360470 | 78360710 |
| chr17 | 78362350 | 78362550 |
| chr17 | 78362949 | 78363189 |
| chr17 | 78363572 | 78363772 |
| chr17 | 78363783 | 78364023 |
| chr17 | 78367081 | 78367361 |
| chr17 | 79477627 | 79478183 |
| chr17 | 79478212 | 79478652 |
| chr17 | 79478728 | 79478888 |
| chr17 | 79478928 | 79479168 |
| chr17 | 79479198 | 79479438 |
| chr17 | 79924371 | 79924491 |
| chr18 | 212696   | 212816   |
| chr18 | 3215170  | 3215290  |
| chr18 | 6300875  | 6300995  |
| chr18 | 8080296  | 8080416  |
| chr18 | 9420444  | 9420564  |
| chr18 | 12422829 | 12422949 |
| chr18 | 12703054 | 12703214 |
| chr18 | 12706494 | 12706774 |

|       |          |          |
|-------|----------|----------|
| chr18 | 12712649 | 12712809 |
| chr18 | 12718454 | 12718694 |
| chr18 | 12720455 | 12720735 |
| chr18 | 12724437 | 12724677 |
| chr18 | 12725383 | 12725583 |
| chr18 | 18540793 | 18540913 |
| chr18 | 19728584 | 19728704 |
| chr18 | 19739441 | 19739561 |
| chr18 | 19742808 | 19742928 |
| chr18 | 19743466 | 19743586 |
| chr18 | 19743994 | 19744114 |
| chr18 | 19746757 | 19746877 |
| chr18 | 19751078 | 19751836 |
| chr18 | 19751846 | 19752324 |
| chr18 | 19756831 | 19757111 |
| chr18 | 19761356 | 19761596 |
| chr18 | 19762661 | 19763072 |
| chr18 | 19765679 | 19765799 |
| chr18 | 19778868 | 19778988 |
| chr18 | 19780562 | 19780842 |
| chr18 | 19786794 | 19786914 |
| chr18 | 19809409 | 19809529 |
| chr18 | 19814736 | 19814856 |
| chr18 | 19821510 | 19821630 |
| chr18 | 19827413 | 19827533 |
| chr18 | 21495422 | 21495542 |
| chr18 | 21543956 | 21544076 |
| chr18 | 23877114 | 23877234 |
| chr18 | 24546576 | 24546696 |
| chr18 | 27571974 | 27572094 |
| chr18 | 30783164 | 30783284 |
| chr18 | 33790953 | 33791073 |
| chr18 | 36805319 | 36805439 |
| chr18 | 39859977 | 39860097 |
| chr18 | 42866490 | 42866610 |
| chr18 | 45881427 | 45881547 |
| chr18 | 48885359 | 48885479 |
| chr18 | 51932956 | 51933076 |
| chr18 | 54949022 | 54949142 |
| chr18 | 57962921 | 57963041 |
| chr18 | 60027180 | 60027300 |
| chr18 | 60795804 | 60796044 |
| chr18 | 60964997 | 60965117 |

|       |          |          |
|-------|----------|----------|
| chr18 | 60985270 | 60985910 |
| chr18 | 63969531 | 63969651 |
| chr18 | 67021940 | 67022060 |
| chr18 | 70029362 | 70029482 |
| chr18 | 72923751 | 72923951 |
| chr18 | 72997399 | 73000599 |
| chr18 | 73056218 | 73056338 |
| chr18 | 76062879 | 76062999 |
| chr19 | 266979   | 267099   |
| chr19 | 929520   | 929904   |
| chr19 | 930813   | 930933   |
| chr19 | 932411   | 932747   |
| chr19 | 933961   | 934081   |
| chr19 | 939564   | 939804   |
| chr19 | 941513   | 941633   |
| chr19 | 960031   | 960325   |
| chr19 | 960993   | 961113   |
| chr19 | 962100   | 962220   |
| chr19 | 963760   | 963880   |
| chr19 | 964195   | 964483   |
| chr19 | 964824   | 965088   |
| chr19 | 966563   | 966875   |
| chr19 | 967650   | 967770   |
| chr19 | 968347   | 968563   |
| chr19 | 971827   | 972115   |
| chr19 | 1611656  | 1611896  |
| chr19 | 1612198  | 1612438  |
| chr19 | 1615275  | 1615827  |
| chr19 | 1619050  | 1619525  |
| chr19 | 1619719  | 1619911  |
| chr19 | 1620910  | 1621244  |
| chr19 | 1621782  | 1622470  |
| chr19 | 1623888  | 1624056  |
| chr19 | 1625520  | 1625760  |
| chr19 | 1627307  | 1627475  |
| chr19 | 1631886  | 1632174  |
| chr19 | 1632271  | 1632463  |
| chr19 | 1646293  | 1646485  |
| chr19 | 1650127  | 1650295  |
| chr19 | 3274544  | 3274664  |
| chr19 | 4090530  | 4090770  |
| chr19 | 4094393  | 4094553  |
| chr19 | 4095316  | 4095516  |

|       |          |          |
|-------|----------|----------|
| chr19 | 4097214  | 4097414  |
| chr19 | 4099185  | 4099425  |
| chr19 | 4100958  | 4101332  |
| chr19 | 4102312  | 4102512  |
| chr19 | 4110439  | 4110719  |
| chr19 | 4117401  | 4117641  |
| chr19 | 4123698  | 4123898  |
| chr19 | 6278637  | 6278757  |
| chr19 | 8968488  | 8968608  |
| chr19 | 9282318  | 9282438  |
| chr19 | 12291550 | 12291670 |
| chr19 | 15271470 | 15272526 |
| chr19 | 15273115 | 15273427 |
| chr19 | 15276120 | 15276384 |
| chr19 | 15276593 | 15276905 |
| chr19 | 15278008 | 15278272 |
| chr19 | 15280842 | 15281034 |
| chr19 | 15281132 | 15281372 |
| chr19 | 15281426 | 15281690 |
| chr19 | 15284876 | 15285212 |
| chr19 | 15288330 | 15288906 |
| chr19 | 15289584 | 15289800 |
| chr19 | 15289832 | 15290096 |
| chr19 | 15290120 | 15290360 |
| chr19 | 15290830 | 15291118 |
| chr19 | 15291433 | 15291697 |
| chr19 | 15291716 | 15292028 |
| chr19 | 15292379 | 15292619 |
| chr19 | 15295051 | 15295315 |
| chr19 | 15295665 | 15295881 |
| chr19 | 15296011 | 15296549 |
| chr19 | 15297635 | 15297851 |
| chr19 | 15297912 | 15298152 |
| chr19 | 15298210 | 15298330 |
| chr19 | 15298640 | 15298856 |
| chr19 | 15298994 | 15299210 |
| chr19 | 15299748 | 15300293 |
| chr19 | 15302231 | 15302471 |
| chr19 | 15302496 | 15302736 |
| chr19 | 15302759 | 15303119 |
| chr19 | 15303138 | 15303378 |
| chr19 | 15308253 | 15308445 |
| chr19 | 15311549 | 15311765 |

|       |          |          |
|-------|----------|----------|
| chr19 | 18315569 | 18315689 |
| chr19 | 20741528 | 20741648 |
| chr19 | 21326298 | 21326418 |
| chr19 | 24338222 | 24338342 |
| chr19 | 28246682 | 28246802 |
| chr19 | 31078158 | 31078278 |
| chr19 | 31246795 | 31246915 |
| chr19 | 31767428 | 31770228 |
| chr19 | 31770244 | 31770684 |
| chr19 | 34253339 | 34253459 |
| chr19 | 36208901 | 36209301 |
| chr19 | 36210326 | 36210486 |
| chr19 | 36210675 | 36212715 |
| chr19 | 36213217 | 36213664 |
| chr19 | 36213896 | 36214176 |
| chr19 | 36214296 | 36214456 |
| chr19 | 36214630 | 36214910 |
| chr19 | 36215484 | 36215684 |
| chr19 | 36215838 | 36216277 |
| chr19 | 36216332 | 36216771 |
| chr19 | 36217095 | 36217295 |
| chr19 | 36217900 | 36218213 |
| chr19 | 36218290 | 36218933 |
| chr19 | 36218955 | 36219115 |
| chr19 | 36219148 | 36219268 |
| chr19 | 36219632 | 36220248 |
| chr19 | 36220369 | 36220489 |
| chr19 | 36220826 | 36221110 |
| chr19 | 36221182 | 36221827 |
| chr19 | 36221962 | 36222082 |
| chr19 | 36222802 | 36223042 |
| chr19 | 36223102 | 36224422 |
| chr19 | 36224442 | 36224818 |
| chr19 | 36224912 | 36225032 |
| chr19 | 36225559 | 36225679 |
| chr19 | 36225938 | 36226058 |
| chr19 | 36227539 | 36227929 |
| chr19 | 36227935 | 36228215 |
| chr19 | 36228413 | 36228693 |
| chr19 | 36228701 | 36229147 |
| chr19 | 36229180 | 36229460 |
| chr19 | 37326224 | 37326344 |
| chr19 | 40649942 | 40650062 |

|       |          |          |
|-------|----------|----------|
| chr19 | 41869331 | 41869451 |
| chr19 | 42381333 | 42381493 |
| chr19 | 42383051 | 42383731 |
| chr19 | 42384690 | 42384850 |
| chr19 | 42384890 | 42385090 |
| chr19 | 42788789 | 42788989 |
| chr19 | 42790857 | 42791414 |
| chr19 | 42791416 | 42791656 |
| chr19 | 42791667 | 42792184 |
| chr19 | 42793020 | 42793260 |
| chr19 | 42793305 | 42793585 |
| chr19 | 42793931 | 42794171 |
| chr19 | 42794361 | 42795641 |
| chr19 | 42795683 | 42795923 |
| chr19 | 42796178 | 42796674 |
| chr19 | 42796704 | 42797024 |
| chr19 | 42797090 | 42797450 |
| chr19 | 42797725 | 42798005 |
| chr19 | 42798023 | 42798510 |
| chr19 | 42798701 | 42799146 |
| chr19 | 42799176 | 42799416 |
| chr19 | 43805671 | 43805791 |
| chr19 | 46877345 | 46877465 |
| chr19 | 47177765 | 47178005 |
| chr19 | 47178232 | 47178432 |
| chr19 | 47181611 | 47181931 |
| chr19 | 47184855 | 47185055 |
| chr19 | 47188665 | 47188825 |
| chr19 | 47192734 | 47193014 |
| chr19 | 47193809 | 47194009 |
| chr19 | 47194947 | 47195107 |
| chr19 | 47195135 | 47195295 |
| chr19 | 47197120 | 47197400 |
| chr19 | 47200372 | 47200532 |
| chr19 | 47200948 | 47201148 |
| chr19 | 47204012 | 47204410 |
| chr19 | 47207416 | 47207656 |
| chr19 | 47207684 | 47207964 |
| chr19 | 47214109 | 47214349 |
| chr19 | 47217068 | 47217308 |
| chr19 | 47219387 | 47219627 |
| chr19 | 49945790 | 49945910 |
| chr19 | 51315763 | 51315883 |

|       |          |          |
|-------|----------|----------|
| chr19 | 52946089 | 52946209 |
| chr19 | 55964660 | 55964780 |
| chr19 | 56166414 | 56166574 |
| chr19 | 56170182 | 56170382 |
| chr19 | 56170523 | 56170763 |
| chr19 | 56171484 | 56171644 |
| chr19 | 56171833 | 56172033 |
| chr19 | 56172359 | 56172599 |
| chr19 | 56173037 | 56173237 |
| chr19 | 56173825 | 56174025 |
| chr19 | 56174920 | 56175160 |
| chr19 | 56179832 | 56180216 |
| chr19 | 56180397 | 56180597 |
| chr19 | 56180793 | 56181073 |
| chr19 | 56185246 | 56185486 |
| chr19 | 57318613 | 57318733 |
| chr19 | 57323214 | 57323334 |
| chr19 | 57325034 | 57328954 |
| chr19 | 57329059 | 57329259 |
| chr19 | 57329322 | 57329442 |
| chr19 | 57329918 | 57330118 |
| chr19 | 57330708 | 57330828 |
| chr19 | 57331851 | 57331971 |
| chr19 | 57332970 | 57333170 |
| chr19 | 57334062 | 57334262 |
| chr19 | 57334459 | 57334699 |
| chr19 | 57334902 | 57335102 |
| chr19 | 57335118 | 57335238 |
| chr19 | 57335626 | 57336026 |
| chr19 | 57339145 | 57339265 |
| chr19 | 57344818 | 57345058 |
| chr19 | 57640027 | 57642827 |
| chr19 | 57642985 | 57643105 |
| chr19 | 57643108 | 57643228 |
| chr19 | 57644387 | 57644507 |
| chr19 | 57644897 | 57645017 |
| chr19 | 57646509 | 57646629 |
| chr19 | 57646954 | 57647074 |
| chr19 | 57647175 | 57647295 |
| chr19 | 57648099 | 57648219 |
| chr19 | 57650167 | 57650287 |
| chr19 | 57652226 | 57652346 |
| chr19 | 57739186 | 57739306 |



|       |          |          |
|-------|----------|----------|
| chr19 | 58965600 | 58965720 |
| chr20 | 68689    | 68809    |
| chr20 | 3081578  | 3081698  |
| chr20 | 4312092  | 4312212  |
| chr20 | 6083433  | 6083553  |
| chr20 | 9110699  | 9110819  |
| chr20 | 12175418 | 12175538 |
| chr20 | 15183833 | 15183953 |
| chr20 | 18187539 | 18187659 |
| chr20 | 21233493 | 21233613 |
| chr20 | 22562413 | 22563811 |
| chr20 | 22564772 | 22564972 |
| chr20 | 23038980 | 23039100 |
| chr20 | 23347492 | 23347612 |
| chr20 | 24242078 | 24242198 |
| chr20 | 29615755 | 29615875 |
| chr20 | 29618231 | 29618351 |
| chr20 | 29619445 | 29619685 |
| chr20 | 29620155 | 29620275 |
| chr20 | 29623139 | 29623393 |
| chr20 | 29623981 | 29624141 |
| chr20 | 29625314 | 29625434 |
| chr20 | 29625828 | 29626028 |
| chr20 | 29628178 | 29628504 |
| chr20 | 29629995 | 29630235 |
| chr20 | 29630602 | 29630802 |
| chr20 | 29631350 | 29631470 |
| chr20 | 29631483 | 29631683 |
| chr20 | 29632565 | 29632765 |
| chr20 | 29633622 | 29633742 |
| chr20 | 29633803 | 29634003 |
| chr20 | 29846342 | 29846462 |
| chr20 | 30946526 | 30946686 |
| chr20 | 30947491 | 30947651 |
| chr20 | 30954127 | 30954327 |
| chr20 | 30955430 | 30955630 |
| chr20 | 30956771 | 30956971 |
| chr20 | 30959483 | 30959683 |
| chr20 | 30959869 | 30960069 |
| chr20 | 31015870 | 31016276 |
| chr20 | 31017087 | 31017287 |
| chr20 | 31017659 | 31017899 |
| chr20 | 31018862 | 31019062 |

|       |          |          |
|-------|----------|----------|
| chr20 | 31019065 | 31019533 |
| chr20 | 31020635 | 31020835 |
| chr20 | 31021083 | 31021723 |
| chr20 | 31022227 | 31025147 |
| chr20 | 33170692 | 33170812 |
| chr20 | 36202288 | 36202408 |
| chr20 | 39210244 | 39210364 |
| chr20 | 39307602 | 39307722 |
| chr20 | 39307753 | 39307873 |
| chr20 | 39311502 | 39311622 |
| chr20 | 39313629 | 39313749 |
| chr20 | 39314609 | 39314729 |
| chr20 | 39316504 | 39317504 |
| chr20 | 39318442 | 39318682 |
| chr20 | 39319124 | 39319244 |
| chr20 | 39320690 | 39320810 |
| chr20 | 39321241 | 39321361 |
| chr20 | 39323256 | 39323496 |
| chr20 | 39323756 | 39323980 |
| chr20 | 39325127 | 39325247 |
| chr20 | 39327195 | 39327337 |
| chr20 | 39327435 | 39327555 |
| chr20 | 39657602 | 39657762 |
| chr20 | 39657978 | 39658138 |
| chr20 | 39689981 | 39690181 |
| chr20 | 39704646 | 39704846 |
| chr20 | 39704906 | 39705106 |
| chr20 | 39706169 | 39706329 |
| chr20 | 39708672 | 39708872 |
| chr20 | 39709742 | 39709942 |
| chr20 | 39713034 | 39713274 |
| chr20 | 39721049 | 39721289 |
| chr20 | 39725800 | 39726040 |
| chr20 | 39726795 | 39727035 |
| chr20 | 39728669 | 39728909 |
| chr20 | 39729780 | 39730060 |
| chr20 | 39741353 | 39741633 |
| chr20 | 39742582 | 39742822 |
| chr20 | 39743944 | 39744144 |
| chr20 | 39744854 | 39745094 |
| chr20 | 39746752 | 39746992 |
| chr20 | 39750282 | 39750482 |
| chr20 | 39750580 | 39750860 |

|       |          |          |
|-------|----------|----------|
| chr20 | 39751765 | 39752005 |
| chr20 | 39797404 | 39797524 |
| chr20 | 40709433 | 40709593 |
| chr20 | 40710469 | 40710709 |
| chr20 | 40713263 | 40713543 |
| chr20 | 40714310 | 40714550 |
| chr20 | 40727006 | 40727246 |
| chr20 | 40730710 | 40730990 |
| chr20 | 40733143 | 40733423 |
| chr20 | 40735373 | 40735613 |
| chr20 | 40738936 | 40739216 |
| chr20 | 40743747 | 40743987 |
| chr20 | 40744610 | 40744770 |
| chr20 | 40746991 | 40747191 |
| chr20 | 40748512 | 40748672 |
| chr20 | 40757331 | 40757531 |
| chr20 | 40770498 | 40770698 |
| chr20 | 40789966 | 40790206 |
| chr20 | 40827818 | 40828098 |
| chr20 | 40864803 | 40864963 |
| chr20 | 40877274 | 40877514 |
| chr20 | 40884615 | 40884735 |
| chr20 | 40898984 | 40899144 |
| chr20 | 40911066 | 40911226 |
| chr20 | 40944339 | 40944659 |
| chr20 | 40979198 | 40979438 |
| chr20 | 40980704 | 40980944 |
| chr20 | 41076794 | 41077034 |
| chr20 | 41100893 | 41101213 |
| chr20 | 41306492 | 41306812 |
| chr20 | 41385048 | 41385328 |
| chr20 | 41400012 | 41400252 |
| chr20 | 41408798 | 41408998 |
| chr20 | 41419810 | 41420130 |
| chr20 | 41514389 | 41514629 |
| chr20 | 41818224 | 41818424 |
| chr20 | 42215414 | 42215534 |
| chr20 | 44746927 | 44747145 |
| chr20 | 44747249 | 44747369 |
| chr20 | 44747886 | 44748006 |
| chr20 | 44748038 | 44748158 |
| chr20 | 44748489 | 44748609 |
| chr20 | 44750363 | 44750577 |

|       |          |          |
|-------|----------|----------|
| chr20 | 44750814 | 44751165 |
| chr20 | 44751201 | 44751441 |
| chr20 | 44751711 | 44751911 |
| chr20 | 44752243 | 44752363 |
| chr20 | 44754847 | 44754967 |
| chr20 | 44755050 | 44755170 |
| chr20 | 44755229 | 44755389 |
| chr20 | 44756719 | 44757082 |
| chr20 | 44757152 | 44757272 |
| chr20 | 44757346 | 44757466 |
| chr20 | 44757479 | 44757719 |
| chr20 | 45258580 | 45258700 |
| chr20 | 48260143 | 48260263 |
| chr20 | 51261835 | 51261955 |
| chr20 | 52950986 | 52951106 |
| chr20 | 54275842 | 54275962 |
| chr20 | 57280938 | 57281058 |
| chr20 | 57415150 | 57415910 |
| chr20 | 57428294 | 57430414 |
| chr20 | 57430555 | 57430755 |
| chr20 | 57466792 | 57466912 |
| chr20 | 57470602 | 57470802 |
| chr20 | 57473937 | 57474097 |
| chr20 | 57474906 | 57475106 |
| chr20 | 57478531 | 57478906 |
| chr20 | 57480386 | 57480586 |
| chr20 | 57484163 | 57484323 |
| chr20 | 57484341 | 57484918 |
| chr20 | 57484950 | 57485190 |
| chr20 | 57485322 | 57485522 |
| chr20 | 57485670 | 57485950 |
| chr20 | 60282500 | 60282620 |
| chr21 | 14687511 | 14687631 |
| chr21 | 17713137 | 17713257 |
| chr21 | 19842516 | 19842636 |
| chr21 | 20716221 | 20716341 |
| chr21 | 23759335 | 23759455 |
| chr21 | 26798029 | 26798149 |
| chr21 | 29803963 | 29804083 |
| chr21 | 32818692 | 32818812 |
| chr21 | 35819003 | 35819123 |
| chr21 | 36164429 | 36164909 |
| chr21 | 36171538 | 36171818 |

|       |          |          |
|-------|----------|----------|
| chr21 | 36193878 | 36194078 |
| chr21 | 36206662 | 36206942 |
| chr21 | 36228626 | 36228826 |
| chr21 | 36231722 | 36231922 |
| chr21 | 36252811 | 36253051 |
| chr21 | 36259134 | 36259414 |
| chr21 | 36261923 | 36262083 |
| chr21 | 36265140 | 36265340 |
| chr21 | 36421087 | 36421247 |
| chr21 | 38860080 | 38860200 |
| chr21 | 41897312 | 41897432 |
| chr21 | 43718422 | 43718542 |
| chr21 | 44513165 | 44513405 |
| chr21 | 44514526 | 44514951 |
| chr21 | 44515496 | 44515696 |
| chr21 | 44515748 | 44515908 |
| chr21 | 44520515 | 44520675 |
| chr21 | 44521428 | 44521588 |
| chr21 | 44524368 | 44524568 |
| chr21 | 44527502 | 44527662 |
| chr21 | 44898266 | 44898386 |
| chr21 | 47917499 | 47917619 |
| chr22 | 16114184 | 16114304 |
| chr22 | 19118641 | 19118761 |
| chr22 | 19960427 | 19960819 |
| chr22 | 21062280 | 21062440 |
| chr22 | 21063525 | 21063725 |
| chr22 | 21064140 | 21064340 |
| chr22 | 21064926 | 21065206 |
| chr22 | 21065576 | 21065816 |
| chr22 | 21066716 | 21067152 |
| chr22 | 21067503 | 21067743 |
| chr22 | 21068680 | 21069051 |
| chr22 | 21071930 | 21072130 |
| chr22 | 21072925 | 21073165 |
| chr22 | 21075525 | 21075765 |
| chr22 | 21080722 | 21080882 |
| chr22 | 21081461 | 21081741 |
| chr22 | 21082006 | 21082206 |
| chr22 | 21083577 | 21083817 |
| chr22 | 21083859 | 21084059 |
| chr22 | 21084119 | 21084359 |
| chr22 | 21087202 | 21087442 |

|       |          |          |
|-------|----------|----------|
| chr22 | 21087957 | 21088197 |
| chr22 | 21088266 | 21088546 |
| chr22 | 21088621 | 21088901 |
| chr22 | 21096459 | 21096699 |
| chr22 | 21096833 | 21097113 |
| chr22 | 21098861 | 21099061 |
| chr22 | 21101810 | 21102050 |
| chr22 | 21104137 | 21104337 |
| chr22 | 21105522 | 21105722 |
| chr22 | 21105902 | 21106102 |
| chr22 | 21107132 | 21107532 |
| chr22 | 21115532 | 21115732 |
| chr22 | 21119051 | 21119291 |
| chr22 | 21119335 | 21119575 |
| chr22 | 21119806 | 21120046 |
| chr22 | 21147425 | 21147585 |
| chr22 | 21150377 | 21150657 |
| chr22 | 21152803 | 21153043 |
| chr22 | 21153352 | 21153592 |
| chr22 | 21153906 | 21154106 |
| chr22 | 21156206 | 21156446 |
| chr22 | 21157423 | 21157663 |
| chr22 | 21158517 | 21158757 |
| chr22 | 21159237 | 21159477 |
| chr22 | 21161597 | 21161797 |
| chr22 | 21165187 | 21165387 |
| chr22 | 21167579 | 21167859 |
| chr22 | 21172703 | 21172903 |
| chr22 | 21173918 | 21174198 |
| chr22 | 21174762 | 21174962 |
| chr22 | 21178557 | 21178757 |
| chr22 | 21188763 | 21188963 |
| chr22 | 21192840 | 21193080 |
| chr22 | 21212763 | 21212963 |
| chr22 | 21212992 | 21213192 |
| chr22 | 22142978 | 22143098 |
| chr22 | 24129302 | 24129502 |
| chr22 | 24133891 | 24134131 |
| chr22 | 24135690 | 24135930 |
| chr22 | 24143106 | 24143346 |
| chr22 | 24145425 | 24145665 |
| chr22 | 24158899 | 24159179 |
| chr22 | 24167386 | 24167626 |

|       |          |          |
|-------|----------|----------|
| chr22 | 24175704 | 24175944 |
| chr22 | 24176267 | 24176427 |
| chr22 | 25144852 | 25144972 |
| chr22 | 28156728 | 28156848 |
| chr22 | 29182009 | 29182129 |
| chr22 | 29182439 | 29182559 |
| chr22 | 29183072 | 29183192 |
| chr22 | 29185052 | 29185172 |
| chr22 | 29185716 | 29185836 |
| chr22 | 29189385 | 29189505 |
| chr22 | 29191161 | 29191721 |
| chr22 | 29191818 | 29191938 |
| chr22 | 29191987 | 29192227 |
| chr22 | 29192609 | 29192729 |
| chr22 | 29193008 | 29193248 |
| chr22 | 29194985 | 29195185 |
| chr22 | 29195905 | 29196065 |
| chr22 | 29196278 | 29196518 |
| chr22 | 29196696 | 29196816 |
| chr22 | 29198090 | 29198210 |
| chr22 | 29204871 | 29204991 |
| chr22 | 31160479 | 31160599 |
| chr22 | 34171319 | 34171439 |
| chr22 | 37196620 | 37196740 |
| chr22 | 40257931 | 40258051 |
| chr22 | 41488955 | 41489155 |
| chr22 | 41489859 | 41489979 |
| chr22 | 41507339 | 41507459 |
| chr22 | 41513187 | 41513827 |
| chr22 | 41519301 | 41519421 |
| chr22 | 41521714 | 41522095 |
| chr22 | 41523481 | 41523761 |
| chr22 | 41525850 | 41526050 |
| chr22 | 41527374 | 41527654 |
| chr22 | 41529996 | 41530116 |
| chr22 | 41531763 | 41531963 |
| chr22 | 41533605 | 41533845 |
| chr22 | 41536102 | 41536302 |
| chr22 | 41536998 | 41537293 |
| chr22 | 41537528 | 41537648 |
| chr22 | 41540963 | 41541083 |
| chr22 | 41541466 | 41541586 |
| chr22 | 41542701 | 41542861 |

|       |          |          |
|-------|----------|----------|
| chr22 | 41543795 | 41544042 |
| chr22 | 41544990 | 41545230 |
| chr22 | 41545763 | 41546203 |
| chr22 | 41547786 | 41548066 |
| chr22 | 41548161 | 41548401 |
| chr22 | 41549860 | 41549980 |
| chr22 | 41550957 | 41551157 |
| chr22 | 41553172 | 41553412 |
| chr22 | 41554359 | 41554559 |
| chr22 | 41556585 | 41556785 |
| chr22 | 41558171 | 41558291 |
| chr22 | 41558674 | 41558834 |
| chr22 | 41560015 | 41560175 |
| chr22 | 41562556 | 41562716 |
| chr22 | 41564407 | 41564647 |
| chr22 | 41564677 | 41564917 |
| chr22 | 41565463 | 41565663 |
| chr22 | 41566352 | 41566632 |
| chr22 | 41568444 | 41568724 |
| chr22 | 41569548 | 41569847 |
| chr22 | 41570684 | 41570804 |
| chr22 | 41572231 | 41572551 |
| chr22 | 41572768 | 41574968 |
| chr22 | 43278088 | 43278208 |
| chr22 | 46422878 | 46422998 |
| chr22 | 49430856 | 49430976 |
| chrX  | 2710780  | 2710900  |
| chrX  | 5713062  | 5713182  |
| chrX  | 8761565  | 8761685  |
| chrX  | 11761973 | 11762093 |
| chrX  | 14795879 | 14795999 |
| chrX  | 15808558 | 15808718 |
| chrX  | 15809016 | 15809176 |
| chrX  | 15817935 | 15818135 |
| chrX  | 15819376 | 15819656 |
| chrX  | 15821764 | 15821964 |
| chrX  | 15822176 | 15822376 |
| chrX  | 15826274 | 15826474 |
| chrX  | 15827281 | 15827481 |
| chrX  | 15833786 | 15834026 |
| chrX  | 15836657 | 15836817 |
| chrX  | 15838284 | 15838484 |
| chrX  | 15840849 | 15841369 |



|      |          |          |
|------|----------|----------|
| chrX | 17797849 | 17797969 |
| chrX | 20871651 | 20871771 |
| chrX | 23884277 | 23884397 |
| chrX | 26955981 | 26956101 |
| chrX | 29959841 | 29959961 |
| chrX | 32966447 | 32966567 |
| chrX | 35993426 | 35993546 |
| chrX | 39007235 | 39007355 |
| chrX | 39893161 | 39893281 |
| chrX | 39908656 | 39908776 |
| chrX | 39909126 | 39909286 |
| chrX | 39911347 | 39911667 |
| chrX | 39913074 | 39913354 |
| chrX | 39913467 | 39913627 |
| chrX | 39914126 | 39914246 |
| chrX | 39914573 | 39914813 |
| chrX | 39915658 | 39915778 |
| chrX | 39916350 | 39916630 |
| chrX | 39917339 | 39917459 |
| chrX | 39918301 | 39918421 |
| chrX | 39921378 | 39921658 |
| chrX | 39921981 | 39922341 |
| chrX | 39922852 | 39923212 |
| chrX | 39923580 | 39923860 |
| chrX | 39925268 | 39925388 |
| chrX | 39928322 | 39928442 |
| chrX | 39930178 | 39930458 |
| chrX | 39930836 | 39930996 |
| chrX | 39931597 | 39934547 |
| chrX | 39935665 | 39935825 |
| chrX | 39937039 | 39937239 |
| chrX | 39938164 | 39938284 |
| chrX | 39944875 | 39944995 |
| chrX | 40982829 | 40983029 |
| chrX | 40988185 | 40988465 |
| chrX | 40990649 | 40990849 |
| chrX | 40993913 | 40994153 |
| chrX | 40996045 | 40996285 |
| chrX | 40999846 | 41000086 |
| chrX | 41000204 | 41000484 |
| chrX | 41000494 | 41000734 |
| chrX | 41002479 | 41002759 |
| chrX | 41003706 | 41003946 |

|      |          |          |
|------|----------|----------|
| chrX | 41007604 | 41007844 |
| chrX | 41010121 | 41010361 |
| chrX | 41012147 | 41012387 |
| chrX | 41021986 | 41022186 |
| chrX | 41025095 | 41025495 |
| chrX | 41026682 | 41026882 |
| chrX | 41027245 | 41027485 |
| chrX | 41029227 | 41029507 |
| chrX | 41029657 | 41029937 |
| chrX | 41030845 | 41031005 |
| chrX | 41031030 | 41031270 |
| chrX | 41043175 | 41043415 |
| chrX | 41043628 | 41043948 |
| chrX | 41045712 | 41045952 |
| chrX | 41047187 | 41047427 |
| chrX | 41048504 | 41048784 |
| chrX | 41055087 | 41055327 |
| chrX | 41055437 | 41055677 |
| chrX | 41055777 | 41056057 |
| chrX | 41056549 | 41056829 |
| chrX | 41057751 | 41058031 |
| chrX | 41060282 | 41060562 |
| chrX | 41064530 | 41064770 |
| chrX | 41069708 | 41069988 |
| chrX | 41073751 | 41074031 |
| chrX | 41075128 | 41075928 |
| chrX | 41076414 | 41076654 |
| chrX | 41077597 | 41077877 |
| chrX | 41078299 | 41078539 |
| chrX | 41082442 | 41082682 |
| chrX | 41083964 | 41084244 |
| chrX | 41084245 | 41084445 |
| chrX | 41088443 | 41088723 |
| chrX | 41088789 | 41089109 |
| chrX | 41089701 | 41089901 |
| chrX | 41091588 | 41091828 |
| chrX | 41193447 | 41193607 |
| chrX | 41193793 | 41194073 |
| chrX | 41196609 | 41196769 |
| chrX | 41198232 | 41198392 |
| chrX | 41200682 | 41200922 |
| chrX | 41201706 | 41202139 |
| chrX | 41202416 | 41202656 |

|      |          |          |
|------|----------|----------|
| chrX | 41202932 | 41203132 |
| chrX | 41203231 | 41203711 |
| chrX | 41204384 | 41204848 |
| chrX | 41205432 | 41205712 |
| chrX | 41205716 | 41205916 |
| chrX | 41206068 | 41206308 |
| chrX | 41206514 | 41206754 |
| chrX | 41206852 | 41207012 |
| chrX | 42009351 | 42009471 |
| chrX | 44732737 | 44733017 |
| chrX | 44733121 | 44733281 |
| chrX | 44782251 | 44782371 |
| chrX | 44785917 | 44786201 |
| chrX | 44786276 | 44786396 |
| chrX | 44794289 | 44794409 |
| chrX | 44811016 | 44811136 |
| chrX | 44820482 | 44820682 |
| chrX | 44833780 | 44834015 |
| chrX | 44870154 | 44870314 |
| chrX | 44872730 | 44872850 |
| chrX | 44879264 | 44879384 |
| chrX | 44879794 | 44880034 |
| chrX | 44886643 | 44886763 |
| chrX | 44887389 | 44887509 |
| chrX | 44894122 | 44894282 |
| chrX | 44896816 | 44897016 |
| chrX | 44910900 | 44911100 |
| chrX | 44913016 | 44913256 |
| chrX | 44918199 | 44918399 |
| chrX | 44918481 | 44918721 |
| chrX | 44919213 | 44919453 |
| chrX | 44919811 | 44920051 |
| chrX | 44920516 | 44920716 |
| chrX | 44921842 | 44922042 |
| chrX | 44922664 | 44923064 |
| chrX | 44928812 | 44929612 |
| chrX | 44931636 | 44931756 |
| chrX | 44935886 | 44936126 |
| chrX | 44937597 | 44937797 |
| chrX | 44938373 | 44938613 |
| chrX | 44941772 | 44942076 |
| chrX | 44942658 | 44942898 |
| chrX | 44945066 | 44945266 |

|      |          |          |
|------|----------|----------|
| chrX | 44948941 | 44949221 |
| chrX | 44949918 | 44950158 |
| chrX | 44953143 | 44953263 |
| chrX | 44965740 | 44965940 |
| chrX | 44966597 | 44966837 |
| chrX | 44969268 | 44969548 |
| chrX | 44970541 | 44970741 |
| chrX | 45013037 | 45013157 |
| chrX | 48178898 | 48179018 |
| chrX | 51344449 | 51344569 |
| chrX | 51637342 | 51637502 |
| chrX | 51637666 | 51637946 |
| chrX | 51638142 | 51638862 |
| chrX | 51639498 | 51640178 |
| chrX | 51640255 | 51640415 |
| chrX | 51640602 | 51640762 |
| chrX | 51640836 | 51641036 |
| chrX | 51641169 | 51641481 |
| chrX | 51641627 | 51641787 |
| chrX | 51643234 | 51643434 |
| chrX | 51644637 | 51645037 |
| chrX | 53221876 | 53222068 |
| chrX | 53222139 | 53222523 |
| chrX | 53222562 | 53222874 |
| chrX | 53222897 | 53223089 |
| chrX | 53223320 | 53223920 |
| chrX | 53224061 | 53224301 |
| chrX | 53224358 | 53224646 |
| chrX | 53225046 | 53225286 |
| chrX | 53225866 | 53226226 |
| chrX | 53226897 | 53227113 |
| chrX | 53227613 | 53227877 |
| chrX | 53227887 | 53228393 |
| chrX | 53230672 | 53230984 |
| chrX | 53230987 | 53231203 |
| chrX | 53239544 | 53240092 |
| chrX | 53240625 | 53240889 |
| chrX | 53240920 | 53241136 |
| chrX | 53243817 | 53244081 |
| chrX | 53244923 | 53245437 |
| chrX | 53246271 | 53246511 |
| chrX | 53246918 | 53247206 |
| chrX | 53247398 | 53247638 |

|      |          |          |
|------|----------|----------|
| chrX | 53247774 | 53247942 |
| chrX | 53249963 | 53250155 |
| chrX | 53250841 | 53251033 |
| chrX | 53253864 | 53254128 |
| chrX | 54731288 | 54731408 |
| chrX | 63749094 | 63749214 |
| chrX | 66865436 | 66865556 |
| chrX | 70022838 | 70022958 |
| chrX | 70338553 | 70338753 |
| chrX | 70339166 | 70339406 |
| chrX | 70339511 | 70339751 |
| chrX | 70339801 | 70340081 |
| chrX | 70340791 | 70341031 |
| chrX | 70341111 | 70341351 |
| chrX | 70341398 | 70341678 |
| chrX | 70341982 | 70342262 |
| chrX | 70342307 | 70342507 |
| chrX | 70342535 | 70342775 |
| chrX | 70342890 | 70343130 |
| chrX | 70343386 | 70343626 |
| chrX | 70343983 | 70344263 |
| chrX | 70344553 | 70344753 |
| chrX | 70344770 | 70345050 |
| chrX | 70345132 | 70345412 |
| chrX | 70345457 | 70345617 |
| chrX | 70345824 | 70346064 |
| chrX | 70346122 | 70346402 |
| chrX | 70346760 | 70347040 |
| chrX | 70347131 | 70347371 |
| chrX | 70347716 | 70347996 |
| chrX | 70348077 | 70348357 |
| chrX | 70348387 | 70348627 |
| chrX | 70348894 | 70349342 |
| chrX | 70349477 | 70349757 |
| chrX | 70349834 | 70350114 |
| chrX | 70351335 | 70351535 |
| chrX | 70351869 | 70352109 |
| chrX | 70352167 | 70352447 |
| chrX | 70352671 | 70352911 |
| chrX | 70352917 | 70353117 |
| chrX | 70354141 | 70354381 |
| chrX | 70354510 | 70354750 |
| chrX | 70354882 | 70355162 |

|      |           |           |
|------|-----------|-----------|
| chrX | 70356117  | 70356517  |
| chrX | 70356663  | 70356943  |
| chrX | 70357019  | 70357259  |
| chrX | 70357346  | 70357813  |
| chrX | 70360407  | 70360607  |
| chrX | 70360679  | 70360879  |
| chrX | 70360896  | 70361096  |
| chrX | 70361217  | 70361337  |
| chrX | 70361673  | 70361873  |
| chrX | 70361966  | 70362126  |
| chrX | 73152927  | 73153047  |
| chrX | 76812080  | 76812200  |
| chrX | 79924013  | 79924133  |
| chrX | 82937006  | 82937126  |
| chrX | 85939024  | 85939144  |
| chrX | 88941105  | 88941225  |
| chrX | 92504100  | 92504220  |
| chrX | 95633558  | 95633678  |
| chrX | 98655997  | 98656117  |
| chrX | 100604828 | 100604988 |
| chrX | 100608140 | 100608380 |
| chrX | 100608816 | 100609016 |
| chrX | 100609569 | 100609729 |
| chrX | 100611027 | 100611267 |
| chrX | 100611717 | 100611997 |
| chrX | 100612453 | 100612613 |
| chrX | 100613241 | 100613481 |
| chrX | 100613564 | 100613724 |
| chrX | 100614227 | 100614387 |
| chrX | 100615026 | 100615186 |
| chrX | 100615509 | 100615789 |
| chrX | 100617114 | 100617274 |
| chrX | 100617492 | 100617732 |
| chrX | 100624926 | 100625126 |
| chrX | 100626574 | 100626734 |
| chrX | 100629472 | 100629672 |
| chrX | 100630081 | 100630321 |
| chrX | 101751388 | 101751508 |
| chrX | 104751474 | 104751594 |
| chrX | 107781637 | 107781757 |
| chrX | 111161141 | 111161261 |
| chrX | 114186055 | 114186175 |
| chrX | 117346792 | 117346912 |

|      |           |           |
|------|-----------|-----------|
| chrX | 119660563 | 119660763 |
| chrX | 119663892 | 119664172 |
| chrX | 119666222 | 119666502 |
| chrX | 119668268 | 119668508 |
| chrX | 119669621 | 119669861 |
| chrX | 119670715 | 119670955 |
| chrX | 119671921 | 119672121 |
| chrX | 119672449 | 119672689 |
| chrX | 119673054 | 119673294 |
| chrX | 119674200 | 119674440 |
| chrX | 119675395 | 119675635 |
| chrX | 119676754 | 119676954 |
| chrX | 119677522 | 119677722 |
| chrX | 119677913 | 119678113 |
| chrX | 119678276 | 119678556 |
| chrX | 119679235 | 119679435 |
| chrX | 119680336 | 119680536 |
| chrX | 119680922 | 119681162 |
| chrX | 119691716 | 119691956 |
| chrX | 119693598 | 119693758 |
| chrX | 119693855 | 119694589 |
| chrX | 119695155 | 119695315 |
| chrX | 119708338 | 119708538 |
| chrX | 120377072 | 120377192 |
| chrX | 123408705 | 123408825 |
| chrX | 123514384 | 123515144 |
| chrX | 123516470 | 123516710 |
| chrX | 123517473 | 123518713 |
| chrX | 123519520 | 123519920 |
| chrX | 123525889 | 123526209 |
| chrX | 123538878 | 123539118 |
| chrX | 123540112 | 123540392 |
| chrX | 123554155 | 123554675 |
| chrX | 123556104 | 123556504 |
| chrX | 123587143 | 123587383 |
| chrX | 123615577 | 123615817 |
| chrX | 123620968 | 123621168 |
| chrX | 123630850 | 123631130 |
| chrX | 123637361 | 123637601 |
| chrX | 123654360 | 123654640 |
| chrX | 123657204 | 123657484 |
| chrX | 123663673 | 123663873 |
| chrX | 123680711 | 123680951 |

|      |           |           |
|------|-----------|-----------|
| chrX | 123695473 | 123695713 |
| chrX | 123697510 | 123697710 |
| chrX | 123699177 | 123699457 |
| chrX | 123775620 | 123775860 |
| chrX | 123778949 | 123779229 |
| chrX | 123780509 | 123780709 |
| chrX | 123785748 | 123785988 |
| chrX | 123787393 | 123787673 |
| chrX | 123805488 | 123805728 |
| chrX | 123838861 | 123839101 |
| chrX | 123870786 | 123871066 |
| chrX | 124028092 | 124028252 |
| chrX | 124029819 | 124030099 |
| chrX | 124097373 | 124097613 |
| chrX | 126410083 | 126410203 |
| chrX | 129474247 | 129474367 |
| chrX | 132475062 | 132475182 |
| chrX | 135476623 | 135476743 |
| chrX | 138485263 | 138485383 |
| chrX | 141598059 | 141598179 |
| chrX | 144612599 | 144612719 |
| chrX | 147628033 | 147628153 |
| chrX | 150654784 | 150654904 |
| chrX | 153659539 | 153659659 |
| chrY | 2655120   | 2655240   |
| chrY | 5755490   | 5755610   |
| chrY | 8775118   | 8775238   |
| chrY | 13315335  | 13315455  |
| chrY | 16331498  | 16331618  |
| chrY | 19360582  | 19360702  |
| chrY | 21867875  | 21868235  |
| chrY | 21868270  | 21868582  |
| chrY | 21868630  | 21868798  |
| chrY | 21869032  | 21869632  |
| chrY | 21869768  | 21870008  |
| chrY | 21870075  | 21870363  |
| chrY | 21870709  | 21870949  |
| chrY | 21871335  | 21871695  |
| chrY | 21872008  | 21872200  |
| chrY | 21872201  | 21872417  |
| chrY | 21877179  | 21877943  |
| chrY | 21878105  | 21878417  |
| chrY | 21878433  | 21878649  |



|      |          |          |
|------|----------|----------|
| chrY | 21882706 | 21883250 |
| chrY | 21885176 | 21885368 |
| chrY | 21893604 | 21893868 |
| chrY | 21893883 | 21894099 |
| chrY | 21894416 | 21894680 |
| chrY | 21897178 | 21897442 |
| chrY | 21897451 | 21897691 |
| chrY | 21901360 | 21901600 |
| chrY | 21903144 | 21903432 |
| chrY | 21903561 | 21903801 |
| chrY | 21904990 | 21905182 |
| chrY | 21906213 | 21906477 |
| chrY | 22597046 | 22597166 |
| chrY | 28498294 | 28498414 |
