# Supplementary material for: A DNA target-enrichment approach to detect mutations, copy number changes and immunoglobulin translocations in multiple myeloma
Source: PubMed Central journal article supplement (PMC5056967; doi:10.1038/bcj.2016.72), 2016-09-02
Supplement: bcj201672x6.pdf [file bcj201672x6.pdf]

**Supplementary table S3.**

| one read mapping in |           |           |         | and the other in any of the following |           |           |          |
|---------------------|-----------|-----------|---------|---------------------------------------|-----------|-----------|----------|
| CHR                 | START     | END       | Comment | CHR                                   | START     | END       | Comment  |
| 14                  | 105994256 | 107288051 | IGH     | 4                                     | 1800000   | 1980000   | t(4;14)  |
|                     |           |           |         | 6                                     | 41750000  | 42000000  | t(6;14)  |
|                     |           |           |         | 8                                     | 125000000 | 130000000 | t(8;14)  |
|                     |           |           |         | 11                                    | 64456000  | 69456000  | t(11;14) |
|                     |           |           |         | 16                                    | 78000000  | 79630000  | t(14;16) |
|                     |           |           |         | 20                                    | 38119089  | 39119089  | t(14;20) |
