# Supplementary material for: A DNA target-enrichment approach to detect mutations, copy number changes and immunoglobulin translocations in multiple myeloma
Source: PubMed Central journal article supplement (PMC5056967; doi:10.1038/bcj.2016.72), 2016-09-02
Supplement: bcj201672x7.pdf [file bcj201672x7.pdf]

| CHR | POS | WT        | MT | cell_line | cell_type | type   | Gene | cDNA    | Prot           | effect     | Targeted_depth | Targeted_AF |             |
|-----|-----|-----------|----|-----------|-----------|--------|------|---------|----------------|------------|----------------|-------------|-------------|
|     | 12  | 18800877  | T  | G         | ARH-77    | MM     | sub  | PIK3C2G | c.4253T>G      | p.V1418G   | missense       | 143         | 0.5         |
|     | 16  | 72831276  | A  | G         | ARH-77    | MM     | sub  | ZFH3    | c.5305T>C      | p.S1769P   | missense       | 67          | 0.45        |
|     | 19  | 15302285  | C  | A         | ARH-77    | MM     | sub  | NOTCH3  | c.986G>T       | p.C329F    | missense       | 74          | 0.55        |
|     | 2   | 141083421 | G  | A         | ARH-77    | MM     | sub  | LRP1B   | c.12250C>T     | p.R4084C   | missense       | 106         | 0.49        |
|     | 11  | 102195846 | A  | T         | BALL-1    | non_MM | sub  | BIRC3   | c.606A>T       | p.R202S    | missense       | 355         | 0.99        |
|     | 12  | 18656350  | A  | T         | BALL-1    | non_MM | sub  | PIK3C2G | c.3029A>T      | p.K1010M   | missense       | 231         | 0.52        |
|     | 12  | 40646786  | C  | T         | BALL-1    | non_MM | sub  | LRRK2   | c.1256C>T      | p.A419V    | missense       | 252         | 1           |
|     | 13  | 32910842  | A  | G         | BALL-1    | non_MM | sub  | BRCA2   | c.2350A>G      | p.M784V    | missense       | 415         | 0.992771084 |
|     | 13  | 92051394  | G  | A         | BALL-1    | non_MM | sub  | GPC5    | c.94G>A        | p.E32K     | missense       | 1582        | 0.049       |
|     | 13  | 92345954  | G  | A         | BALL-1    | non_MM | sub  | GPC5    | c.839G>A       | p.G280D    | missense       | 386         | 0.31        |
|     | 16  | 89858913  | C  | T         | BALL-1    | non_MM | sub  | FANCA   | c.1049G>A      | p.R350Q    | missense       | 109         | 0.43        |
|     | 17  | 15978874  | T  | G         | BALL-1    | non_MM | sub  | NCOR1   | c.3644A>C      | p.K1215T   | missense       | 122         | 0.99        |
|     | 17  | 41203106  | T  | C         | BALL-1    | non_MM | sub  | BRCA1   | c.5306A>G      | p.Y1769C   | missense       | 146         | 0.51        |
|     | 17  | 7577096   | T  | C         | BALL-1    | non_MM | sub  | TP53    | c.842A>G       | p.D281G    | missense       | 83          | 0.975903614 |
|     | 17  | 78341626  | A  | G         | BALL-1    | non_MM | sub  | RNF213  | c.6169A>G      | p.T2057A   | missense       | 317         | 0.057       |
|     | 6   | 51735401  | T  | G         | BALL-1    | non_MM | sub  | PKHD1   | c.7387A>C      | p.K2463Q   | missense       | 353         | 0.062       |
|     | 7   | 124487025 | A  | G         | BALL-1    | non_MM | sub  | POT1    | c.977T>C       | p.V326A    | missense       | 236         | 1           |
|     | 7   | 82581918  | A  | G         | BALL-1    | non_MM | sub  | PCLO    | c.8351T>C      | p.I2784T   | missense       | 457         | 0.044       |
|     | 8   | 77768069  | G  | A         | BALL-1    | non_MM | sub  | ZFH4    | c.8777G>A      | p.R2926H   | missense       | 326         | 0.49        |
|     | 8   | 77776592  | C  | T         | BALL-1    | non_MM | sub  | ZFH4    | c.10507C>T     | p.L3503F   | missense       | 290         | 0.083       |
| X   |     | 70342119  | G  | A         | BALL-1    | non_MM | sub  | MED12   | c.1171G>A      | p.G391S    | missense       | 160         | 0.15        |
|     | 11  | 102201850 | G  | A         | CESS      | non_MM | sub  | BIRC3   | c.1202G>A      | p.R401K    | missense       | 365         | 0.446575342 |
|     | 15  | 90630768  | T  | C         | CESS      | non_MM | sub  | IDH2    | c.718A>G       | p.I240V    | missense       | 256         | 0.52        |
|     | 19  | 31770175  | G  | A         | CESS      | non_MM | sub  | TSHZ3   | c.524C>T       | p.T175M    | missense       | 139         | 0.47        |
|     | 2   | 152359878 | T  | G         | CESS      | non_MM | sub  | NEB     | c.18717A>C     | p.Q6239H   | missense       | 211         | 0.62        |
|     | 3   | 193201770 | C  | T         | CESS      | non_MM | sub  | ATP13A4 | c.763G>A       | p.V255I    | missense       | 351         | 0.48        |
|     | 5   | 112176429 | T  | C         | CESS      | non_MM | sub  | APC     | c.5138T>C      | p.L1713S   | missense       | 349         | 0.55        |
|     | 5   | 13864684  | A  | G         | CESS      | non_MM | sub  | DNAH5   | c.4418T>C      | p.I1473T   | missense       | 208         | 0.45        |
|     | 7   | 82583068  | T  | A         | CESS      | non_MM | sub  | PCLO    | c.7201A>T      | p.I2401L   | missense       | 121         | 0.42        |
|     | 8   | 77690582  | C  | T         | CESS      | non_MM | sub  | ZFH4    | c.3154C>T      | p.R1052W   | missense       | 248         | 0.5         |
|     | 9   | 8465638   | C  | T         | CESS      | non_MM | sub  | TPRD    | c.3542G>A      | p.R1181H   | missense       | 262         | 0.43        |
|     | 1   | 16259531  | G  | A         | CTV-1     | MM     | sub  | SPEN    | c.6796G>A      | p.D2266N   | missense       | 96          | 0.46        |
|     | 1   | 16260138  | C  | T         | CTV-1     | MM     | sub  | SPEN    | c.7403C>T      | p.P2468L   | missense       | 123         | 0.48        |
|     | 1   | 27099036  | G  | A         | CTV-1     | MM     | sub  | ARID1A  | c.3452G>A      | p.S1151N   | missense       | 97          | 0.53        |
|     | 1   | 27106662  | G  | T         | CTV-1     | MM     | sub  | ARID1A  | c.6273G>T      | p.W2091C   | missense       | 132         | 0.39        |
|     | 10  | 104161574 | G  | A         | CTV-1     | MM     | sub  | NFKB2   | c.2366G>A      | p.G789D    | missense       | 108         | 0.5         |
|     | 10  | 43610015  | G  | T         | CTV-1     | MM     | sub  | RET     | c.1967G>T      | p.C656F    | missense       | 130         | 0.46        |
|     | 11  | 102195549 | C  | A         | CTV-1     | MM     | sub  | BIRC3   | c.309C>A       | p.N103K    | missense       | 210         | 0.5         |
|     | 11  | 61081381  | G  | C         | CTV-1     | MM     | sub  | DBB1    | c.1814C>G      | p.A605G    | missense       | 109         | 0.39        |
|     | 11  | 62571390  | C  | T         | CTV-1     | MM     | sub  | NXF1    | c.89G>A        | p.R30Q     | missense       | 179         | 0.54        |
|     | 11  | 70332590  | G  | A         | CTV-1     | MM     | sub  | SHANK2  | c.3790C>T      | p.R1264W   | missense       | 107         | 0.3         |
|     | 11  | 92085985  | G  | A         | CTV-1     | MM     | sub  | FAT3    | c.707G>A       | p.R236Q    | missense       | 120         | 0.52        |
|     | 12  | 48376668  | C  | T         | CTV-1     | MM     | sub  | COL2A1  | c.2156G>A      | p.R719H    | missense       | 116         | 0.47        |
|     | 12  | 6495274   | C  | T         | CTV-1     | MM     | sub  | LTBR    | c.515C>T       | p.A172V    | missense       | 46          | 0.65        |
|     | 13  | 28592653  | C  | T         | CTV-1     | MM     | sub  | FLT3    | c.2492G>A      | p.G831E    | missense       | 175         | 0.5         |
|     | 13  | 73346926  | C  | A         | CTV-1     | MM     | sub  | DIS3    | c.1291G>T      | p.E431*    | nonsense       | 115         | 0.33        |
|     | 14  | 71199721  | C  | A         | CTV-1     | MM     | sub  | MAP3K9  | c.2407G>T      | p.E803*    | nonsense       | 115         | 0.46        |
|     | 15  | 42028660  | C  | T         | CTV-1     | MM     | sub  | MGA     | c.4198C>T      | p.P1400S   | missense       | 153         | 0.46        |
|     | 15  | 42040883  | C  | G         | CTV-1     | MM     | sub  | MGA     | c.5408C>G      | p.T1803R   | missense       | 95          | 0.4         |
|     | 15  | 91292901  | G  | A         | CTV-1     | MM     | sub  | BLM     | c.403G>A       | p.A135T    | missense       | 185         | 0.48        |
|     | 16  | 28909648  | C  | T         | CTV-1     | MM     | sub  | ATP2A1  | c.1640C>T      | p.A547V    | missense       | 132         | 0.48        |
|     | 16  | 89871784  | C  | T         | CTV-1     | MM     | sub  | FANCA   | c.613G>A       | p.A205T    | missense       | 131         | 0.44        |
|     | 16  | 8993456   | A  | C         | CTV-1     | MM     | sub  | USP7    | c.2463+5T>Gp.? | ess splice | 107            | 0.49        |             |
|     | 17  | 11572991  | T  | G         | CTV-1     | MM     | sub  | DNAH9   | c.3233T>G      | p.I1078S   | missense       | 146         | 0.49        |
|     | 17  | 11833393  | C  | A         | CTV-1     | MM     | sub  | DNAH9   | c.12088C>A     | p.L4030M   | missense       | 54          | 0.35        |
|     | 17  | 29588745  | G  | A         | CTV-1     | MM     | sub  | NF1     | c.4594G>A      | p.G1532R   | missense       | 141         | 0.44        |
|     | 17  | 3851047   | C  | T         | CTV-1     | MM     | sub  | ATP2A3  | c.733G>A       | p.E245K    | missense       | 137         | 0.53        |
|     | 17  | 3851063   | C  | A         | CTV-1     | MM     | sub  | ATP2A3  | c.717G>T       | p.M239I    | missense       | 129         | 0.43        |
|     | 17  | 43348402  | C  | T         | CTV-1     | MM     | sub  | MAP3K14 | c.1190G>A      | p.G397D    | missense       | 120         | 0.49        |
|     | 17  | 43362195  | T  | C         | CTV-1     | MM     | sub  | MAP3K14 | c.1271A>G      | p.Q424R    | missense       | 88          | 0.44        |
|     | 17  | 59937249  | C  | T         | CTV-1     | MM     | sub  | BRP1    | c.113G>A       | p.S38N     | missense       | 125         | 0.45        |
|     | 17  | 7752773   | C  | T         | CTV-1     | MM     | sub  | KDM6B   | c.3167C>T      | p.P1056L   | missense       | 124         | 0.52        |
|     | 17  | 7752983   | G  | A         | CTV-1     | MM     | sub  | KDM6B   | c.3377G>A      | p.R1126Q   | missense       | 129         | 0.54        |
|     | 18  | 60985887  | C  | A         | CTV-1     | MM     | sub  | BCL2    | c.13G>T        | p.G5W      | missense       | 84          | 0.46        |
|     | 19  | 47177931  | G  | A         | CTV-1     | MM     | sub  | PRKD2   | c.2486C>T      | p.T829M    | missense       | 137         | 0.48        |
|     | 2   | 152396917 | G  | A         | CTV-1     | MM     | sub  | NEB     | c.15730C>T     | p.P5244S   | missense       | 98          | 0.41        |
|     | 2   | 25469134  | C  | A         | CTV-1     | MM     | sub  | DNMT3A  | c.1324G>T      | p.E442*    | nonsense       | 109         | 0.51        |
|     | 2   | 9347281   | G  | T         | CTV-1     | MM     | sub  | ASAP2   | c.48G>T        | p.E16D     | missense       | 125         | 0.34        |
|     | 20  | 39317132  | G  | A         | CTV-1     | MM     | sub  | MAFB    | c.359C>T       | p.P120L    | missense       | 101         | 0.49        |
|     | 3   | 138374245 | C  | T         | CTV-1     | MM     | sub  | PIK3CB  | c.3199G>A      | p.D1067N   | missense       | 118         | 0.49        |
|     | 3   | 170800100 | G  | A         | CTV-1     | MM     | sub  | TNIK    | c.3253C>T      | p.R1085W   | missense       | 123         | 0.47        |
|     | 3   | 52685795  | T  | C         | CTV-1     | MM     | sub  | PBRM1   | c.677A>G       | p.E226G    | missense       | 124         | 0.3         |
|     | 4   | 153247289 | G  | A         | CTV-1     | MM     | sub  | FBXW7   | c.1513C>T      | p.R505C    | missense       | 152         | 0.47        |
|     | 4   | 153247373 | C  | T         | CTV-1     | MM     | sub  | FBXW7   | c.1429G>A      | p.G477S    | missense       | 102         | 0.48        |
|     | 4   | 187558064 | G  | A         | CTV-1     | MM     | sub  | FAT1    | c.3647C>T      | p.T1216I   | missense       | 87          | 0.38        |
|     | 4   | 187627816 | C  | T         | CTV-1     | MM     | sub  | FAT1    | c.3166G>A      | p.V1056M   | missense       | 133         | 0.53        |
|     | 5   | 13769218  | G  | T         | CTV-1     | MM     | sub  | DNAH5   | c.9748C>A      | p.Q3250K   | missense       | 113         | 0.55        |
|     | 5   | 149501471 | C  | T         | CTV-1     | MM     | sub  | PDGFRB  | c.2316G>A      | p.M772I    | missense       | 113         | 0.44        |

|   |    |           |   |   |           |        |     |         |            |          |            |     |             |
|---|----|-----------|---|---|-----------|--------|-----|---------|------------|----------|------------|-----|-------------|
|   | 5  | 56177668  | C | T | CTV-1     | MM     | sub | MAP3K1  | c.2641C>T  | p.Q881*  | nonsense   | 110 | 0.47        |
|   | 6  | 117631340 | T | C | CTV-1     | MM     | sub | ROS1    | c.6338A>G  | p.D2113G | missense   | 151 | 0.21        |
|   | 6  | 117683833 | T | C | CTV-1     | MM     | sub | ROS1    | c.3314A>G  | p.N1105S | missense   | 197 | 0.23        |
|   | 6  | 128302281 | T | C | CTV-1     | MM     | sub | PTPRK   | c.3709A>G  | p.I1237V | missense   | 190 | 0.24        |
|   | 6  | 15512580  | G | A | CTV-1     | MM     | sub | JARID2  | c.3094G>A  | p.A1032T | missense   | 112 | 0.46        |
|   | 6  | 157100553 | G | A | CTV-1     | MM     | sub | ARID1B  | c.1316G>A  | p.S439N  | missense   | 131 | 0.22        |
|   | 6  | 31548874  | C | T | CTV-1     | MM     | sub | LTB     | c.347G>A   | p.G116E  | missense   | 143 | 0.46        |
|   | 7  | 148544344 | C | T | CTV-1     | MM     | sub | EZH2    | c.47G>A    | p.R16Q   | missense   | 89  | 0.53        |
|   | 7  | 82579156  | G | A | CTV-1     | MM     | sub | PCLO    | c.10748C>T | p.A3583V | missense   | 128 | 0.55        |
|   | 7  | 82785556  | C | A | CTV-1     | MM     | sub | PCLO    | c.401G>T   | p.S134I  | missense   | 99  | 0.43        |
|   | 9  | 139390623 | G | T | CTV-1     | MM     | sub | NOTCH1  | c.7568C>A  | p.S2523* | nonsense   | 160 | 0.43        |
|   | 9  | 8486271   | G | A | CTV-1     | MM     | sub | PTPRD   | c.2546C>T  | p.T849I  | missense   | 121 | 0.55        |
| X |    | 39932305  | G | T | CTV-1     | MM     | sub | BCOR    | c.2294C>A  | p.S765Y  | missense   | 75  | 1           |
| X |    | 39932813  | G | A | CTV-1     | MM     | sub | BCOR    | c.1786C>T  | p.Q596*  | nonsense   | 67  | 1           |
| X |    | 70341449  | G | A | CTV-1     | MM     | sub | MED12   | c.884G>A   | p.R295H  | missense   | 34  | 1           |
| X |    | 70349177  | G | C | CTV-1     | MM     | sub | MED12   | c.3589G>C  | p.V1197L | missense   | 54  | 0.98        |
|   | 3  | 47098571  | C | G | EHEB      | non_MM | sub | SETD2   | c.6703G>C  | p.V2235L | missense   | 107 | 0.45        |
|   | 1  | 115256529 | T | A | HL-60     | non_MM | sub | NRAS    | c.182A>T   | p.Q61L   | missense   | 347 | 0.54        |
|   | 9  | 21971120  | G | A | HL-60     | non_MM | sub | CDKN2A  | c.238C>T   | p.R80*   | nonsense   | 114 | 1           |
|   | 1  | 115256530 | G | T | IM-9      | MM     | sub | NRAS    | c.181C>A   | p.Q61K   | missense   | 190 | 0.46        |
|   | 13 | 32907075  | C | A | IM-9      | MM     | sub | BRCA2   | c.1460C>A  | p.A487E  | missense   | 212 | 0.53        |
|   | 19 | 31770055  | C | T | IM-9      | MM     | sub | TSHZ3   | c.644G>A   | p.R215H  | missense   | 146 | 0.44        |
|   | 2  | 152515585 | C | T | IM-9      | MM     | sub | NEB     | c.6069G>A  | p.M2023I | missense   | 186 | 0.483870968 |
|   | 2  | 152536299 | T | C | IM-9      | MM     | sub | NEB     | c.3191A>G  | p.Y1064C | missense   | 113 | 0.522123894 |
|   | 22 | 21080786  | C | G | IM-9      | MM     | sub | PI4KA   | c.4811G>C  | p.R1604T | missense   | 57  | 0.37        |
|   | 4  | 187541228 | G | A | IM-9      | MM     | sub | FAT1    | c.6512C>T  | p.P2171L | missense   | 185 | 0.45        |
|   | 8  | 77766214  | A | G | IM-9      | MM     | sub | ZFH4    | c.6922A>G  | p.M2308V | missense   | 222 | 0.53        |
|   | 17 | 12044528  | T | C | JVM-3     | non_MM | sub | MAP2K4  | c.1151T>C  | p.I384T  | missense   | 179 | 0.49        |
|   | 2  | 178096390 | T | A | JVM-3     | non_MM | sub | NFE2L2  | c.941A>T   | p.N314I  | missense   | 225 | 0.56        |
|   | 3  | 47147516  | A | C | JVM-3     | non_MM | sub | SETD2   | c.4810T>G  | p.Y1604D | missense   | 208 | 0.37        |
|   | 3  | 47162351  | C | T | JVM-3     | non_MM | sub | SETD2   | c.3775G>A  | p.G1259S | missense   | 276 | 0.032608696 |
|   | 4  | 187525619 | T | A | JVM-3     | non_MM | sub | FAT1    | c.10460A>T | p.K3487M | missense   | 143 | 0.29        |
|   | 7  | 140453132 | T | A | JVM-3     | non_MM | sub | BRAF    | c.1803A>T  | p.K601N  | missense   | 121 | 0.45        |
|   | 11 | 119169190 | G | C | K-562     | non_MM | sub | CBL     | c.2374G>C  | p.D792H  | missense   | 183 | 0.31        |
|   | 12 | 56488312  | C | T | K-562     | non_MM | sub | ERBB3   | c.1831C>T  | p.R611W  | missense   | 139 | 0.61        |
|   | 19 | 42795793  | G | A | K-562     | non_MM | sub | CIC     | c.2782G>A  | p.A928T  | missense   | 103 | 0.62        |
|   | 2  | 178096531 | G | C | K-562     | non_MM | sub | NFE2L2  | c.800C>G   | p.T267R  | missense   | 391 | 0.49        |
|   | 20 | 31022288  | C | A | K-562     | non_MM | sub | ASXL1   | c.1773C>A  | p.Y591*  | nonsense   | 173 | 0.32        |
|   | 3  | 3194255   | G | A | K-562     | non_MM | sub | CRBN    | c.1033C>T  | p.P345S  | missense   | 266 | 0.29        |
|   | 4  | 187524859 | T | C | K-562     | non_MM | sub | FAT1    | c.10821A>G | p.I3607M | missense   | 260 | 0.67        |
|   | 4  | 1941422   | C | T | K-562     | non_MM | sub | WHSC1   | c.1798C>T  | p.R600*  | nonsense   | 267 | 0.33        |
|   | 5  | 13794109  | C | A | K-562     | non_MM | sub | DNAH5   | c.7946G>T  | p.G2649V | missense   | 307 | 0.47        |
|   | 6  | 117715410 | C | A | K-562     | non_MM | sub | ROS1    | c.1079G>T  | p.R360I  | missense   | 273 | 0.29        |
|   | 6  | 160450640 | A | G | K-562     | non_MM | sub | IGF2R   | c.835A>G   | p.S279G  | missense   | 225 | 0.49        |
|   | 7  | 82544404  | C | T | K-562     | non_MM | sub | PCLO    | c.12898G>A | p.G4300R | missense   | 269 | 0.17        |
|   | 7  | 82581620  | C | A | K-562     | non_MM | sub | PCLO    | c.8649G>T  | p.W2883C | missense   | 280 | 0.19        |
|   | 8  | 77618486  | C | A | K-562     | non_MM | sub | ZFH4    | c.2163C>A  | p.D721E  | missense   | 212 | 0.33        |
|   | 1  | 120483279 | C | A | KARPAS-45 | non_MM | sub | NOTCH2  | c.3082G>T  | p.E1028* | nonsense   | 221 | 0.23        |
|   | 1  | 16256495  | G | A | KARPAS-45 | non_MM | sub | SPEN    | c.3760G>A  | p.D1254N | missense   | 448 | 0.074       |
|   | 1  | 16260017  | C | A | KARPAS-45 | non_MM | sub | SPEN    | c.7282C>A  | p.P2428T | missense   | 264 | 0.24        |
|   | 1  | 193219834 | A | T | KARPAS-45 | non_MM | sub | CDC73   | c.1588A>T  | p.R530*  | nonsense   | 257 | 0.089       |
|   | 1  | 23885511  | C | T | KARPAS-45 | non_MM | sub | ID3     | c.301-1G>A | p.?      | ess splice | 257 | 0.23        |
|   | 1  | 27106003  | G | A | KARPAS-45 | non_MM | sub | ARID1A  | c.5614G>A  | p.A1872T | missense   | 313 | 0.11        |
|   | 1  | 43812513  | C | G | KARPAS-45 | non_MM | sub | MPL     | c.1216C>G  | p.L406V  | missense   | 202 | 0.23        |
|   | 1  | 99161244  | A | G | KARPAS-45 | non_MM | sub | SNX7    | c.810A>G   | p.I270M  | missense   | 277 | 0.051       |
|   | 10 | 43615557  | A | G | KARPAS-45 | non_MM | sub | RET     | c.2636A>G  | p.N879S  | missense   | 183 | 0.18        |
|   | 10 | 63829505  | G | T | KARPAS-45 | non_MM | sub | ARID5B  | c.1148G>T  | p.G383V  | missense   | 266 | 0.29        |
|   | 10 | 89720852  | C | T | KARPAS-45 | non_MM | sub | PTEN    | c.1003C>T  | p.R335*  | nonsense   | 378 | 0.99        |
|   | 10 | 96006280  | A | G | KARPAS-45 | non_MM | sub | PLCE1   | c.2998A>G  | p.S1000G | missense   | 350 | 0.24        |
|   | 10 | 96058279  | A | G | KARPAS-45 | non_MM | sub | PLCE1   | c.5311A>G  | p.R1771G | missense   | 336 | 0.45        |
|   | 11 | 108128318 | G | T | KARPAS-45 | non_MM | sub | ATM     | c.2361G>T  | p.L787F  | missense   | 206 | 0.21        |
|   | 11 | 108173611 | A | G | KARPAS-45 | non_MM | sub | ATM     | c.5351A>G  | p.N1784S | missense   | 307 | 0.21        |
|   | 11 | 108173686 | T | C | KARPAS-45 | non_MM | sub | ATM     | c.5426T>C  | p.L1809P | missense   | 302 | 0.24        |
|   | 11 | 119156061 | G | A | KARPAS-45 | non_MM | sub | CBL     | c.1726G>A  | p.D576N  | missense   | 319 | 0.52        |
|   | 11 | 533833    | C | G | KARPAS-45 | non_MM | sub | HRAS    | c.223G>C   | p.G75R   | missense   | 284 | 0.049       |
|   | 11 | 61068301  | C | A | KARPAS-45 | non_MM | sub | DBP1    | c.3319G>T  | p.E1107* | nonsense   | 245 | 0.54        |
|   | 11 | 61094313  | T | C | KARPAS-45 | non_MM | sub | DBP1    | c.602A>G   | p.E201G  | missense   | 369 | 0.49        |
|   | 11 | 62563623  | C | T | KARPAS-45 | non_MM | sub | NXF1    | c.1376G>A  | p.R459H  | missense   | 322 | 0.071       |
|   | 11 | 62563815  | C | A | KARPAS-45 | non_MM | sub | NXF1    | c.1289G>T  | p.S430I  | missense   | 343 | 0.061       |
|   | 12 | 113531466 | G | A | KARPAS-45 | non_MM | sub | DTX1    | c.1126G>A  | p.G376R  | missense   | 273 | 0.42        |
|   | 12 | 12022876  | C | T | KARPAS-45 | non_MM | sub | ETV6    | c.982C>T   | p.H328Y  | missense   | 120 | 0.19        |
|   | 12 | 124817676 | C | A | KARPAS-45 | non_MM | sub | NCOR2   | c.6776G>T  | p.S2259I | missense   | 175 | 0.21        |
|   | 12 | 132446413 | T | C | KARPAS-45 | non_MM | sub | EP400   | c.1249T>C  | p.Y417H  | missense   | 448 | 0.11        |
|   | 12 | 132505701 | G | A | KARPAS-45 | non_MM | sub | EP400   | c.4522G>A  | p.A1508T | missense   | 168 | 0.5         |
|   | 12 | 132561107 | G | T | KARPAS-45 | non_MM | sub | EP400   | c.9065G>T  | p.S3022I | missense   | 247 | 0.065       |
|   | 12 | 18439812  | T | C | KARPAS-45 | non_MM | sub | PIK3C2G | c.710T>C   | p.V237A  | missense   | 266 | 0.24        |
|   | 12 | 40688680  | C | T | KARPAS-45 | non_MM | sub | LRRK2   | c.2842C>T  | p.R948*  | nonsense   | 188 | 0.43        |
|   | 12 | 40704267  | G | C | KARPAS-45 | non_MM | sub | LRRK2   | c.4352G>C  | p.G1451A | missense   | 223 | 0.49        |
|   | 12 | 4383403   | T | C | KARPAS-45 | non_MM | sub | CCND2   | c.195+2T>C | p.?      | ess splice | 230 | 0.091       |

|    |           |   |   |           |        |     |         |             |          |            |     |             |
|----|-----------|---|---|-----------|--------|-----|---------|-------------|----------|------------|-----|-------------|
| 12 | 4385295   | T | C | KARPAS-45 | non_MM | sub | CCND2   | c.320T>C    | p.F107S  | missense   | 231 | 0.082       |
| 12 | 48368054  | G | A | KARPAS-45 | non_MM | sub | COL2A1  | c.4135C>T   | p.R1379C | missense   | 209 | 0.091       |
| 12 | 56481806  | C | T | KARPAS-45 | non_MM | sub | ERBB3   | c.734C>T    | p.A245V  | missense   | 325 | 0.052       |
| 12 | 56486791  | G | A | KARPAS-45 | non_MM | sub | ERBB3   | c.1205G>A   | p.W402*  | nonsense   | 302 | 0.076       |
| 12 | 6500019   | G | T | KARPAS-45 | non_MM | sub | LTBR    | c.1224G>T   | p.K408N  | missense   | 277 | 0.22        |
| 12 | 6559401   | C | T | KARPAS-45 | non_MM | sub | CD27    | c.331C>T    | p.Q111*  | nonsense   | 205 | 0.25        |
| 13 | 32906445  | A | G | KARPAS-45 | non_MM | sub | BRCA2   | c.830A>G    | p.N277S  | missense   | 275 | 0.51        |
| 13 | 32914236  | C | T | KARPAS-45 | non_MM | sub | BRCA2   | c.5744C>T   | p.T1915M | missense   | 495 | 0.484848485 |
| 13 | 92101156  | G | T | KARPAS-45 | non_MM | sub | GPC5    | c.305G>T    | p.R102L  | missense   | 278 | 0.46        |
| 14 | 21860815  | A | C | KARPAS-45 | non_MM | sub | CHD8    | c.5785T>G   | p.Y1929D | missense   | 236 | 0.25        |
| 14 | 58830888  | A | G | KARPAS-45 | non_MM | sub | ARID4A  | c.2081A>G   | p.D694G  | missense   | 176 | 0.43        |
| 14 | 71199856  | C | T | KARPAS-45 | non_MM | sub | MAP3K9  | c.2272G>A   | p.A758T  | missense   | 326 | 0.058       |
| 15 | 40504699  | G | A | KARPAS-45 | non_MM | sub | BUB1B   | c.2386-1G>A | p.?      | ess splice | 345 | 0.12        |
| 15 | 40512907  | G | A | KARPAS-45 | non_MM | sub | BUB1B   | c.3100G>A   | p.A1034T | missense   | 316 | 0.028481013 |
| 15 | 42003059  | C | T | KARPAS-45 | non_MM | sub | MGA     | c.2596C>T   | p.R866*  | nonsense   | 449 | 0.45        |
| 15 | 42058807  | G | A | KARPAS-45 | non_MM | sub | MGA     | c.8674G>A   | p.G2892S | missense   | 504 | 0.51        |
| 15 | 67457723  | G | A | KARPAS-45 | non_MM | sub | SMAD3   | c.532+1G>A  | p.?      | ess splice | 213 | 0.21        |
| 15 | 90630465  | C | A | KARPAS-45 | non_MM | sub | IDH2    | c.846G>T    | p.K282N  | missense   | 354 | 0.076       |
| 15 | 91304297  | A | G | KARPAS-45 | non_MM | sub | BLM     | c.1694A>G   | p.D565G  | missense   | 494 | 0.14        |
| 15 | 91334041  | C | T | KARPAS-45 | non_MM | sub | BLM     | c.2986C>T   | p.H996Y  | missense   | 314 | 0.099       |
| 15 | 91346897  | G | A | KARPAS-45 | non_MM | sub | BLM     | c.3505G>A   | p.A1169T | missense   | 383 | 0.22        |
| 15 | 91347499  | G | T | KARPAS-45 | non_MM | sub | BLM     | c.3661G>T   | p.E1221* | nonsense   | 442 | 0.086       |
| 15 | 99440060  | C | T | KARPAS-45 | non_MM | sub | IGF1R   | c.1028C>T   | p.S343F  | missense   | 364 | 0.51        |
| 16 | 3779548   | G | A | KARPAS-45 | non_MM | sub | CREBBP  | c.5500C>T   | p.Q1834* | nonsense   | 304 | 0.52        |
| 16 | 72828719  | T | C | KARPAS-45 | non_MM | sub | ZFH3    | c.7862A>G   | p.K2621R | missense   | 283 | 0.28        |
| 16 | 72993849  | C | T | KARPAS-45 | non_MM | sub | ZFH3    | c.196G>A    | p.A66T   | missense   | 223 | 0.52        |
| 16 | 8998350   | C | A | KARPAS-45 | non_MM | sub | USP7    | c.1646G>T   | p.R549M  | missense   | 184 | 0.15        |
| 16 | 9009156   | C | T | KARPAS-45 | non_MM | sub | USP7    | c.1033G>A   | p.E345K  | missense   | 341 | 0.13        |
| 16 | 9014262   | C | A | KARPAS-45 | non_MM | sub | USP7    | c.565G>T    | p.V189F  | missense   | 407 | 0.076       |
| 16 | 9017144   | C | T | KARPAS-45 | non_MM | sub | USP7    | c.311G>A    | p.R104H  | missense   | 247 | 0.13        |
| 17 | 11523060  | C | T | KARPAS-45 | non_MM | sub | DNAH9   | c.1312C>T   | p.R438*  | nonsense   | 183 | 0.51        |
| 17 | 11593344  | A | G | KARPAS-45 | non_MM | sub | DNAH9   | c.4205A>G   | p.D1402G | missense   | 324 | 0.27        |
| 17 | 12032498  | A | G | KARPAS-45 | non_MM | sub | MAP2K4  | c.934A>G    | p.S312G  | missense   | 261 | 0.073       |
| 17 | 15935786  | A | G | KARPAS-45 | non_MM | sub | NCOR1   | c.7147T>C   | p.F2383L | missense   | 143 | 0.26        |
| 17 | 29654769  | C | A | KARPAS-45 | non_MM | sub | NF1     | c.5521C>A   | p.Q1841K | missense   | 383 | 0.1         |
| 17 | 37922668  | C | T | KARPAS-45 | non_MM | sub | IKZF3   | c.905G>A    | p.R302H  | missense   | 398 | 0.23        |
| 17 | 3833729   | C | T | KARPAS-45 | non_MM | sub | ATP2A3  | c.2611-1G>A | p.?      | ess splice | 248 | 0.073       |
| 17 | 3840839   | G | A | KARPAS-45 | non_MM | sub | ATP2A3  | c.2192C>T   | p.A731V  | missense   | 209 | 0.057       |
| 17 | 3840876   | C | T | KARPAS-45 | non_MM | sub | ATP2A3  | c.2155G>A   | p.A719T  | missense   | 179 | 0.13        |
| 17 | 3844321   | C | T | KARPAS-45 | non_MM | sub | ATP2A3  | c.2044G>A   | p.A682T  | missense   | 238 | 0.21        |
| 17 | 3844949   | C | T | KARPAS-45 | non_MM | sub | ATP2A3  | c.1546-1G>A | p.?      | ess splice | 150 | 0.3         |
| 17 | 3848035   | C | T | KARPAS-45 | non_MM | sub | ATP2A3  | c.1250G>A   | p.C417Y  | missense   | 226 | 0.11        |
| 17 | 47685270  | G | A | KARPAS-45 | non_MM | sub | SPOP    | c.680C>T    | p.A227V  | missense   | 205 | 0.46        |
| 17 | 59760659  | A | G | KARPAS-45 | non_MM | sub | BRIP1   | c.3748T>C   | p.*1250Q | stop-lost  | 222 | 0.095       |
| 17 | 62121353  | G | T | KARPAS-45 | non_MM | sub | ERN1    | c.2929C>A   | p.L977I  | missense   | 174 | 0.49        |
| 17 | 62158169  | C | T | KARPAS-45 | non_MM | sub | ERN1    | c.176-1G>A  | p.?      | ess splice | 285 | 0.06        |
| 17 | 70117894  | A | C | KARPAS-45 | non_MM | sub | SOX9    | c.364A>C    | p.K122Q  | missense   | 142 | 0.22        |
| 17 | 7577121   | G | A | KARPAS-45 | non_MM | sub | TP53    | c.817C>T    | p.R273C  | missense   | 242 | 0.479338843 |
| 17 | 7578406   | C | T | KARPAS-45 | non_MM | sub | TP53    | c.524G>A    | p.R175H  | missense   | 280 | 0.48        |
| 17 | 7579313   | G | A | KARPAS-45 | non_MM | sub | TP53    | c.374C>T    | p.T125M  | missense   | 145 | 0.082758621 |
| 17 | 7749937   | T | C | KARPAS-45 | non_MM | sub | KDM6B   | c.590T>C    | p.V197A  | missense   | 258 | 0.28        |
| 17 | 7751546   | G | A | KARPAS-45 | non_MM | sub | KDM6B   | c.1940G>A   | p.G647D  | missense   | 270 | 0.21        |
| 17 | 78327398  | G | T | KARPAS-45 | non_MM | sub | RNF213  | c.4729G>T   | p.E1577* | nonsense   | 202 | 0.084       |
| 17 | 78341569  | G | A | KARPAS-45 | non_MM | sub | RNF213  | c.6112G>A   | p.V2038M | missense   | 309 | 0.52        |
| 17 | 79477969  | C | A | KARPAS-45 | non_MM | sub | ACTG1   | c.968G>T    | p.S323I  | missense   | 217 | 0.092       |
| 17 | 79478564  | A | G | KARPAS-45 | non_MM | sub | ACTG1   | c.452T>C    | p.I151T  | missense   | 275 | 0.5         |
| 17 | 79479302  | G | T | KARPAS-45 | non_MM | sub | ACTG1   | c.79C>A     | p.P27T   | missense   | 254 | 0.075       |
| 18 | 19751259  | C | T | KARPAS-45 | non_MM | sub | GATA6   | c.154C>T    | p.R52W   | missense   | 294 | 0.47        |
| 18 | 72998423  | G | A | KARPAS-45 | non_MM | sub | TSHZ1   | c.926G>A    | p.R309Q  | missense   | 236 | 0.5         |
| 19 | 15290294  | T | C | KARPAS-45 | non_MM | sub | NOTCH3  | c.3341A>G   | p.Y1114C | missense   | 291 | 0.21        |
| 19 | 15302905  | C | T | KARPAS-45 | non_MM | sub | NOTCH3  | c.545G>A    | p.R182H  | missense   | 284 | 0.25        |
| 19 | 4102376   | C | T | KARPAS-45 | non_MM | sub | MAP2K2  | c.526G>A    | p.A176T  | missense   | 214 | 0.4         |
| 19 | 4110526   | C | A | KARPAS-45 | non_MM | sub | MAP2K2  | c.431G>T    | p.S144I  | missense   | 365 | 0.23        |
| 19 | 42383293  | G | A | KARPAS-45 | non_MM | sub | CD79A   | c.313G>A    | p.V105M  | missense   | 311 | 0.28        |
| 19 | 47177813  | C | T | KARPAS-45 | non_MM | sub | PRKD2   | c.2604G>A   | p.M868I  | missense   | 262 | 0.26        |
| 2  | 102507646 | C | T | KARPAS-45 | non_MM | sub | MAP4K4  | c.3898C>T   | p.R1300W | missense   | 181 | 0.28        |
| 2  | 141986892 | G | A | KARPAS-45 | non_MM | sub | LRP1B   | c.710C>T    | p.T237I  | missense   | 248 | 0.29        |
| 2  | 152426672 | A | G | KARPAS-45 | non_MM | sub | NEB     | c.12250T>C  | p.Y4084H | missense   | 180 | 0.29        |
| 2  | 152512752 | T | C | KARPAS-45 | non_MM | sub | NEB     | c.6410A>G   | p.Y2137C | missense   | 228 | 0.34        |
| 2  | 178096504 | G | A | KARPAS-45 | non_MM | sub | NFE2L2  | c.827C>T    | p.T276I  | missense   | 364 | 0.32        |
| 2  | 25471040  | C | A | KARPAS-45 | non_MM | sub | DNMT3A  | c.721G>T    | p.E241*  | nonsense   | 81  | 0.25        |
| 2  | 29416573  | C | A | KARPAS-45 | non_MM | sub | ALK     | c.4380G>T   | p.E1460D | missense   | 263 | 0.34        |
| 2  | 61706076  | T | A | KARPAS-45 | non_MM | sub | XPO1    | c.3095A>T   | p.D1032V | missense   | 247 | 0.032388664 |
| 20 | 22563629  | G | A | KARPAS-45 | non_MM | sub | FOXA2   | c.251C>T    | p.A84V   | missense   | 232 | 0.25        |
| 20 | 41101119  | C | T | KARPAS-45 | non_MM | sub | PTPRT   | c.1237G>A   | p.A413T  | missense   | 229 | 0.59        |
| 21 | 44514778  | G | A | KARPAS-45 | non_MM | sub | U2AF1   | c.469C>T    | p.Q157*  | nonsense   | 332 | 0.23        |
| 22 | 21104218  | G | T | KARPAS-45 | non_MM | sub | P14KA   | c.3044C>A   | p.P1015H | missense   | 140 | 0.086       |
| 22 | 24167480  | C | A | KARPAS-45 | non_MM | sub | SMARCB1 | c.864C>A    | p.N288K  | missense   | 251 | 0.46        |
| 3  | 138433507 | C | T | KARPAS-45 | non_MM | sub | PIK3CB  | c.1105G>A   | p.V369I  | missense   | 275 | 0.31        |

|   |           |          |   |           |          |        |        |                |          |            |          |             |             |
|---|-----------|----------|---|-----------|----------|--------|--------|----------------|----------|------------|----------|-------------|-------------|
| 3 | 141231095 | G        | A | KARPAS-45 | non_MM   | sub    | RASA2  | c.224G>A       | p.R75H   | missense   | 303      | 0.63        |             |
| 3 | 141327331 | A        | G | KARPAS-45 | non_MM   | sub    | RASA2  | c.2017A>G      | p.M673V  | missense   | 168      | 0.35        |             |
| 3 | 142215353 | G        | T | KARPAS-45 | non_MM   | sub    | ATR    | c.5748C>A      | p.Y1916* | nonsense   | 190      | 0.079       |             |
| 3 | 170841384 | C        | T | KARPAS-45 | non_MM   | sub    | TNIK   | c.2120+1G>Ap.? |          | ess splice | 127      | 0.14        |             |
| 3 | 170843927 | A        | G | KARPAS-45 | non_MM   | sub    | TNIK   | c.1787T>C      | p.V596A  | missense   | 106      | 0.26        |             |
| 3 | 178917489 | G        | A | KARPAS-45 | non_MM   | sub    | PIK3CA | c.364G>A       | p.G122S  | missense   | 191      | 0.32        |             |
| 3 | 47098564  | C        | T | KARPAS-45 | non_MM   | sub    | SETD2  | c.6710G>A      | p.S2237N | missense   | 201      | 0.1         |             |
| 3 | 52595799  | C        | A | KARPAS-45 | non_MM   | sub    | PBRM1  | c.4176G>T      | p.K1392N | missense   | 166      | 0.084       |             |
| 3 | 78685048  | A        | G | KARPAS-45 | non_MM   | sub    | ROBO1  | c.3131T>C      | p.L1044P | missense   | 211      | 0.33        |             |
| 3 | 78688924  | C        | T | KARPAS-45 | non_MM   | sub    | ROBO1  | c.2890G>A      | p.D964N  | missense   | 86       | 0.36        |             |
| 3 | 89457249  | A        | G | KARPAS-45 | non_MM   | sub    | EPHA3  | c.1730A>G      | p.D577G  | missense   | 239      | 0.35        |             |
| 3 | 8955369   | T        | A | KARPAS-45 | non_MM   | sub    | RAD18  | c.925A>T       | p.K309*  | nonsense   | 241      | 0.32        |             |
| 4 | 126370690 | G        | A | KARPAS-45 | non_MM   | sub    | FAT4   | c.8519G>A      | p.R2840H | missense   | 292      | 0.2         |             |
| 4 | 126411835 | T        | C | KARPAS-45 | non_MM   | sub    | FAT4   | c.13858T>C     | p.Y4620H | missense   | 264      | 0.27        |             |
| 4 | 153247289 | G        | A | KARPAS-45 | non_MM   | sub    | FBXW7  | c.1513C>T      | p.R505C  | missense   | 303      | 0.65        |             |
| 4 | 175897971 | C        | T | KARPAS-45 | non_MM   | sub    | ADAM29 | c.1295C>T      | p.T432I  | missense   | 257      | 0.34        |             |
| 4 | 187510360 | T        | C | KARPAS-45 | non_MM   | sub    | FAT1   | c.13153A>G     | p.T4385A | missense   | 105      | 0.076       |             |
| 4 | 187524399 | T        | C | KARPAS-45 | non_MM   | sub    | FAT1   | c.11281A>G     | p.T3761A | missense   | 155      | 0.15        |             |
| 4 | 187524995 | C        | T | KARPAS-45 | non_MM   | sub    | FAT1   | c.10685G>A     | p.G3562D | missense   | 243      | 0.11        |             |
| 4 | 187525064 | C        | T | KARPAS-45 | non_MM   | sub    | FAT1   | c.10616G>A     | p.S3539N | missense   | 241      | 0.14        |             |
| 4 | 187549484 | A        | G | KARPAS-45 | non_MM   | sub    | FAT1   | c.4634T>C      | p.F1545S | missense   | 183      | 0.28        |             |
| 4 | 1918621   | T        | C | KARPAS-45 | non_MM   | sub    | WHSC1  | c.784T>C       | p.Y262H  | missense   | 452      | 0.25        |             |
| 4 | 55961055  | C        | T | KARPAS-45 | non_MM   | sub    | KDR    | c.2885G>A      | p.R962H  | missense   | 253      | 0.53        |             |
| 5 | 112177617 | A        | G | KARPAS-45 | non_MM   | sub    | APC    | c.6326A>G      | p.N2109S | missense   | 397      | 0.055       |             |
| 5 | 112177872 | T        | C | KARPAS-45 | non_MM   | sub    | APC    | c.6581T>C      | p.V2194A | missense   | 380      | 0.23        |             |
| 5 | 13752344  | G        | T | KARPAS-45 | non_MM   | sub    | DNAH5  | c.10927C>A     | p.L3643I | missense   | 233      | 0.39        |             |
| 5 | 137802832 | G        | A | KARPAS-45 | non_MM   | sub    | EGR1   | c.694G>A       | p.A232T  | missense   | 306      | 0.12        |             |
| 5 | 137803735 | G        | T | KARPAS-45 | non_MM   | sub    | EGR1   | c.1597G>T      | p.A533S  | missense   | 245      | 0.082       |             |
| 5 | 149502651 | C        | T | KARPAS-45 | non_MM   | sub    | PDGFRB | c.2137G>A      | p.A713T  | missense   | 319      | 0.6         |             |
| 5 | 149513252 | G        | T | KARPAS-45 | non_MM   | sub    | PDGFRB | c.831C>A       | p.H277Q  | missense   | 255      | 0.51        |             |
| 5 | 150923606 | C        | G | KARPAS-45 | non_MM   | sub    | FAT2   | c.7082G>C      | p.G2361A | missense   | 329      | 0.53        |             |
| 5 | 66460423  | G        | T | KARPAS-45 | non_MM   | sub    | MAST4  | c.4849G>T      | p.D1617Y | missense   | 265      | 0.11        |             |
| 5 | 66462230  | C        | T | KARPAS-45 | non_MM   | sub    | MAST4  | c.6656C>T      | p.A2219V | missense   | 330      | 0.48        |             |
| 6 | 106552838 | G        | A | KARPAS-45 | non_MM   | sub    | PRDM1  | c.803G>A       | p.R268H  | missense   | 514      | 0.59        |             |
| 6 | 106555015 | C        | T | KARPAS-45 | non_MM   | sub    | PRDM1  | c.2132C>T      | p.A711V  | missense   | 461      | 0.2         |             |
| 6 | 114270421 | T        | C | KARPAS-45 | non_MM   | sub    | HDAC2  | c.925A>G       | p.I309V  | missense   | 400      | 0.44        |             |
| 6 | 117725565 | A        | G | KARPAS-45 | non_MM   | sub    | ROS1   | c.316T>C       | p.F106L  | missense   | 378      | 0.37        |             |
| 6 | 160464302 | G        | A | KARPAS-45 | non_MM   | sub    | IGF2R  | c.1603G>A      | p.A535T  | missense   | 311      | 0.061       |             |
| 6 | 161455467 | G        | A | KARPAS-45 | non_MM   | sub    | MAP3K4 | c.329G>A       | p.R110Q  | missense   | 312      | 0.62        |             |
| 6 | 32166763  | C        | A | KARPAS-45 | non_MM   | sub    | NOTCH4 | c.4475G>T      | p.R1492L | missense   | 362      | 0.046961326 |             |
| 6 | 41903806  | G        | T | KARPAS-45 | non_MM   | sub    | CCND3  | c.751C>A       | p.L251I  | missense   | 243      | 0.23        |             |
| 6 | 45459768  | T        | C | KARPAS-45 | non_MM   | sub    | RUNX2  | c.980T>C       | p.V327A  | missense   | 329      | 0.21        |             |
| 6 | 51774167  | A        | G | KARPAS-45 | non_MM   | sub    | PKHD1  | c.6596T>C      | p.V2199A | missense   | 397      | 0.071       |             |
| 7 | 121698987 | T        | A | KARPAS-45 | non_MM   | sub    | PTPRZ1 | c.6662T>A      | p.V2221D | missense   | 281      | 0.078       |             |
| 7 | 148526829 | C        | T | KARPAS-45 | non_MM   | sub    | EZH2   | c.475G>A       | p.G159R  | missense   | 275      | 0.44        |             |
| 7 | 21695478  | A        | G | KARPAS-45 | non_MM   | sub    | DNAH11 | c.4988A>G      | p.D1663G | missense   | 307      | 0.068       |             |
| 7 | 21726869  | A        | G | KARPAS-45 | non_MM   | sub    | DNAH11 | c.5795A>G      | p.Y1932C | missense   | 257      | 0.51        |             |
| 7 | 50444234  | G        | A | KARPAS-45 | non_MM   | sub    | IKZF1  | c.164G>A       | p.S55N   | missense   | 287      | 0.13        |             |
| 7 | 55210117  | T        | C | KARPAS-45 | non_MM   | sub    | EGFR   | c.227T>C       | p.L76P   | missense   | 247      | 0.48        |             |
| 7 | 82390800  | T        | C | KARPAS-45 | non_MM   | sub    | PCLO   | c.15017A>G     | p.Q5006R | missense   | 197      | 0.47        |             |
| 7 | 82595436  | T        | A | KARPAS-45 | non_MM   | sub    | PCLO   | c.3668A>T      | p.E1223V | missense   | 363      | 0.088       |             |
| 7 | 82785230  | G        | A | KARPAS-45 | non_MM   | sub    | PCLO   | c.727C>T       | p.Q243*  | nonsense   | 302      | 0.24        |             |
| 7 | 92247491  | C        | T | KARPAS-45 | non_MM   | sub    | CDK6   | c.729G>A       | p.W243*  | nonsense   | 326      | 0.071       |             |
| 8 | 128750966 | A        | G | KARPAS-45 | non_MM   | sub    | MYC    | c.503A>G       | p.Q168R  | missense   | 323      | 0.22        |             |
| 8 | 77765405  | T        | C | KARPAS-45 | non_MM   | sub    | ZFHX4  | c.6113T>C      | p.M2038T | missense   | 141      | 0.23        |             |
| 8 | 77767027  | T        | A | KARPAS-45 | non_MM   | sub    | ZFHX4  | c.7735T>A      | p.Y2579N | missense   | 391      | 0.24        |             |
| 9 | 139391719 | C        | T | KARPAS-45 | non_MM   | sub    | NOTCH1 | c.6472G>A      | p.V2158I | missense   | 337      | 0.2         |             |
| 9 | 139391892 | A        | G | KARPAS-45 | non_MM   | sub    | NOTCH1 | c.6299T>C      | p.I2100T | missense   | 286      | 0.34        |             |
| 9 | 139393398 | C        | T | KARPAS-45 | non_MM   | sub    | NOTCH1 | c.6133G>A      | p.V2045I | missense   | 278      | 0.2         |             |
| 9 | 139395053 | C        | T | KARPAS-45 | non_MM   | sub    | NOTCH1 | c.5885G>A      | p.R1962H | missense   | 281      | 0.39        |             |
| 9 | 139395161 | C        | T | KARPAS-45 | non_MM   | sub    | NOTCH1 | c.5777G>A      | p.R1926H | missense   | 317      | 0.05        |             |
| 9 | 139396284 | C        | T | KARPAS-45 | non_MM   | sub    | NOTCH1 | c.5554G>A      | p.D1852N | missense   | 229      | 0.17        |             |
| 9 | 139397675 | A        | G | KARPAS-45 | non_MM   | sub    | NOTCH1 | c.5126T>C      | p.L1709P | missense   | 230      | 0.33        |             |
| 9 | 139397775 | C        | T | KARPAS-45 | non_MM   | sub    | NOTCH1 | c.5026G>A      | p.V1676I | missense   | 197      | 0.19        |             |
| 9 | 139818415 | C        | T | KARPAS-45 | non_MM   | sub    | TRAF2  | c.1250C>T      | p.P417L  | missense   | 159      | 0.69        |             |
| 9 | 21971120  | G        | A | KARPAS-45 | non_MM   | sub    | CDKN2A | c.238C>T       | p.R80*   | nonsense   | 230      | 0.991304348 |             |
| 9 | 8317920   | C        | T | KARPAS-45 | non_MM   | sub    | PTPRD  | c.5693G>A      | p.R1898H | missense   | 186      | 0.328       |             |
| 9 | 8319926   | T        | C | KARPAS-45 | non_MM   | sub    | PTPRD  | c.5575A>G      | p.I1859V | missense   | 168      | 0.64        |             |
| 9 | 87339190  | G        | A | KARPAS-45 | non_MM   | sub    | NTRK2  | c.772G>A       | p.D258N  | missense   | 185      | 0.69        |             |
| 9 | 87342797  | T        | C | KARPAS-45 | non_MM   | sub    | NTRK2  | c.1082T>C      | p.L361P  | missense   | 277      | 0.12        |             |
| X | 41203649  | G        | A | KARPAS-45 | non_MM   | sub    | DDX3X  | c.1022G>A      | p.C341Y  | missense   | 180      | 0.48        |             |
| X | 53224108  | C        | T | KARPAS-45 | non_MM   | sub    | KDM5C  | c.3438+5G>Ap.? |          | ess splice | 111      | 0.099       |             |
| X | 70341238  | G        | A | KARPAS-45 | non_MM   | sub    | MED12  | c.797G>A       | p.R266H  | missense   | 180      | 0.23        |             |
| X | 70348159  | G        | A | KARPAS-45 | non_MM   | sub    | MED12  | c.3223G>A      | p.A1075T | missense   | 191      | 0.49        |             |
| X | 70352988  | C        | T | KARPAS-45 | non_MM   | sub    | MED12  | c.4543C>T      | p.R1515* | nonsense   | 182      | 0.24        |             |
| X | 70360544  | C        | T | KARPAS-45 | non_MM   | sub    | MED12  | c.6104C>T      | p.A2035V | missense   | 130      | 0.45        |             |
|   | 13        | 95273424 | A | G         | KASUMI-1 | non_MM | sub    | GPR180         | c.829A>G | p.R277G    | missense | 270         | 0.43        |
|   | 15        | 74836779 | G | C         | KASUMI-1 | non_MM | sub    | ARID3B         | c.502G>C | p.V168L    | missense | 356         | 0.412921348 |
|   | 15        | 99251007 | C | T         | KASUMI-1 | non_MM | sub    | IGF1R          | c.311C>T | p.T104M    | missense | 287         | 0.47        |

|    |           |   |   |           |        |     |        |             |          |            |     |             |
|----|-----------|---|---|-----------|--------|-----|--------|-------------|----------|------------|-----|-------------|
| 17 | 7577538   | C | T | KASUMI-1  | non_MM | sub | TP53   | c.743G>A    | p.R248Q  | missense   | 88  | 1           |
| 19 | 1612406   | T | A | KASUMI-1  | non_MM | sub | TCF3   | c.1613A>T   | p.E538V  | missense   | 203 | 0.5         |
| 4  | 175899083 | C | T | KASUMI-1  | non_MM | sub | ADAM29 | c.2407C>T   | p.Q803*  | nonsense   | 253 | 0.3         |
| 6  | 117642495 | C | T | KASUMI-1  | non_MM | sub | ROS1   | c.5704G>A   | p.E1902K | missense   | 355 | 0.523943662 |
| 7  | 21658769  | C | T | KASUMI-1  | non_MM | sub | DNAH11 | c.4321C>T   | p.R1441W | missense   | 387 | 0.542635659 |
| 7  | 21698468  | A | G | KASUMI-1  | non_MM | sub | DNAH11 | c.5162A>G   | p.H1721R | missense   | 193 | 0.5         |
| 1  | 43818443  | A | G | KMS-11    | MM     | sub | MPL    | c.1908A>G   | p.*636W  | stop-lost  | 72  | 0.61        |
| 11 | 119148988 | C | T | KMS-11    | MM     | sub | CBL    | c.1208C>T   | p.S403F  | missense   | 98  | 0.082       |
| 12 | 124824918 | G | A | KMS-11    | MM     | sub | NCOR2  | c.5431C>T   | p.R1811W | missense   | 105 | 0.49        |
| 12 | 31253975  | C | T | KMS-11    | MM     | sub | DDX11  | c.1963C>T   | p.P655S  | missense   | 105 | 0.057142857 |
| 17 | 62157063  | T | C | KMS-11    | MM     | sub | ERN1   | c.241A>G    | p.S81G   | missense   | 177 | 0.2         |
| 19 | 15295205  | G | T | KMS-11    | MM     | sub | NOTCH3 | c.2467C>A   | p.H823N  | missense   | 102 | 0.31        |
| 19 | 31770405  | C | A | KMS-11    | MM     | sub | TSHZ3  | c.294G>T    | p.E98D   | missense   | 90  | 0.19        |
| 2  | 102482984 | C | T | KMS-11    | MM     | sub | MAP4K4 | c.2299C>T   | p.Q767*  | nonsense   | 55  | 0.31        |
| 2  | 141299461 | C | T | KMS-11    | MM     | sub | LRP1B  | c.7274G>A   | p.R2425K | missense   | 72  | 0.47        |
| 2  | 152347020 | C | T | KMS-11    | MM     | sub | NEB    | c.19595G>A  | p.R6532H | missense   | 218 | 0.62        |
| 2  | 152373056 | C | T | KMS-11    | MM     | sub | NEB    | c.17719G>A  | p.E5907K | missense   | 242 | 0.11        |
| 2  | 152422269 | G | C | KMS-11    | MM     | sub | NEB    | c.13119C>G  | p.D4373E | missense   | 250 | 0.4         |
| 2  | 152512444 | C | T | KMS-11    | MM     | sub | NEB    | c.6589G>A   | p.E2197K | missense   | 220 | 0.22        |
| 4  | 1806099   | A | G | KMS-11    | MM     | sub | FGFR3  | c.1118A>G   | p.Y373C  | missense   | 111 | 0.45        |
| 4  | 187584654 | T | C | KMS-11    | MM     | sub | FAT1   | c.3379A>G   | p.I1127V | missense   | 202 | 0.52        |
| 4  | 187628521 | C | A | KMS-11    | MM     | sub | FAT1   | c.2461G>T   | p.E821*  | nonsense   | 254 | 0.15        |
| 5  | 112176660 | G | A | KMS-11    | MM     | sub | APC    | c.5369G>A   | p.R1790K | missense   | 183 | 0.34        |
| 5  | 149515232 | C | T | KMS-11    | MM     | sub | PDGFRB | c.250G>A    | p.V84M   | missense   | 69  | 0.97        |
| 5  | 66459026  | C | T | KMS-11    | MM     | sub | MAST4  | c.3452C>T   | p.P1151L | missense   | 196 | 0.12        |
| 7  | 21784584  | G | A | KMS-11    | MM     | sub | DNAH11 | c.8434G>A   | p.E2812K | missense   | 233 | 0.06        |
| 7  | 82435118  | T | C | KMS-11    | MM     | sub | PCLO   | c.14819A>G  | p.E4940G | missense   | 77  | 0.091       |
| 9  | 8485274   | G | C | KMS-11    | MM     | sub | TPPRD  | c.3106C>G   | p.L1036V | missense   | 145 | 0.29        |
| 11 | 92533998  | G | A | KMS-12-BM | MM     | sub | FAT3   | c.7819G>A   | p.A2607T | missense   | 216 | 0.17        |
| 12 | 31244771  | C | T | KMS-12-BM | MM     | sub | DDX11  | c.1208C>T   | p.T403M  | missense   | 195 | 0.41        |
| 12 | 430171    | C | T | KMS-12-BM | MM     | sub | KDM5A  | c.2531G>A   | p.R844Q  | missense   | 128 | 0.42        |
| 15 | 91326152  | C | A | KMS-12-BM | MM     | sub | BLM    | c.2656C>A   | p.H886N  | missense   | 218 | 0.48        |
| 3  | 10108987  | A | C | KMS-12-BM | MM     | sub | FANCD2 | c.2480A>C   | p.E827A  | missense   | 134 | 0.46        |
| 3  | 89456423  | C | A | KMS-12-BM | MM     | sub | EPHA3  | c.1599C>A   | p.F533L  | missense   | 158 | 0.54        |
| 6  | 31549372  | C | G | KMS-12-BM | MM     | sub | LTB    | c.244G>C    | p.D82H   | missense   | 68  | 0.57        |
| 6  | 31549398  | T | C | KMS-12-BM | MM     | sub | LTB    | c.218A>G    | p.K73R   | missense   | 56  | 0.62        |
| 7  | 82764569  | A | T | KMS-12-BM | MM     | sub | PCLO   | c.2297T>A   | p.L766H  | missense   | 180 | 0.46        |
| 7  | 82784113  | G | T | KMS-12-BM | MM     | sub | PCLO   | c.1844C>A   | p.T615N  | missense   | 144 | 0.46        |
| 1  | 115256528 | T | G | L-363     | MM     | sub | NRAS   | c.183A>C    | p.Q61H   | missense   | 109 | 0.47        |
| 1  | 27057949  | C | G | L-363     | MM     | sub | ARID1A | c.1657C>G   | p.Q553E  | missense   | 70  | 0.4         |
| 12 | 56487289  | G | A | L-363     | MM     | sub | ERBB3  | c.1435G>A   | p.E479K  | missense   | 71  | 0.52        |
| 15 | 99482568  | G | A | L-363     | MM     | sub | IGF1R  | c.3436G>A   | p.D1146N | missense   | 150 | 0.68        |
| 16 | 3828071   | A | C | L-363     | MM     | sub | CREBBP | c.2054T>G   | p.L685*  | nonsense   | 73  | 0.096       |
| 16 | 89809206  | G | A | L-363     | MM     | sub | FANCA  | c.3765+2C>T | p.?      | ess splice | 73  | 0.51        |
| 16 | 8994457   | G | A | L-363     | MM     | sub | USP7   | c.2239C>T   | p.Q747*  | nonsense   | 101 | 0.47        |
| 17 | 78351591  | G | T | L-363     | MM     | sub | RNF213 | c.7759G>T   | p.G2587* | nonsense   | 35  | 0.23        |
| 17 | 78360674  | C | G | L-363     | MM     | sub | RNF213 | c.9124C>G   | p.P3042A | missense   | 31  | 0.23        |
| 20 | 29633907  | T | A | L-363     | MM     | sub | FRG1B  | c.546T>A    | p.N182K  | missense   | 603 | 0.035       |
| 3  | 178936091 | G | A | L-363     | MM     | sub | PIK3CA | c.1633G>A   | p.E545K  | missense   | 157 | 0.45        |
| 3  | 78649435  | G | T | L-363     | MM     | sub | ROBO1  | c.4652C>A   | p.P1551H | missense   | 101 | 0.49        |
| 6  | 32163297  | C | T | L-363     | MM     | sub | NOTCH4 | c.5929G>A   | p.E1977K | missense   | 79  | 0.63        |
| 7  | 21628186  | G | A | L-363     | MM     | sub | DNAH11 | c.1905G>A   | p.M635I  | missense   | 150 | 0.31        |
| 7  | 82582600  | G | T | L-363     | MM     | sub | PCLO   | c.7669C>A   | p.P2557T | missense   | 171 | 0.32        |
| 11 | 69456169  | G | A | LP-1      | MM     | sub | CNND1  | c.88G>A     | p.A30T   | missense   | 139 | 0.55        |
| 16 | 72831992  | C | A | LP-1      | MM     | sub | ZFXH3  | c.4589G>T   | p.G1530V | missense   | 156 | 0.49        |
| 2  | 141643868 | T | C | LP-1      | MM     | sub | LRP1B  | c.3803A>G   | p.H1268R | missense   | 86  | 0.91        |
| 2  | 202137633 | G | A | LP-1      | MM     | sub | CASP8  | c.740G>A    | p.S247N  | missense   | 138 | 0.4         |
| 20 | 40713407  | G | A | LP-1      | MM     | sub | PTPRT  | c.4051C>T   | p.R1351C | missense   | 117 | 0.3         |
| 5  | 13769721  | C | T | LP-1      | MM     | sub | DNAH5  | c.9609G>A   | p.M3203I | missense   | 130 | 0.28        |
| 6  | 157522211 | C | T | LP-1      | MM     | sub | ARID1B | c.4429C>T   | p.R1477C | missense   | 88  | 0.84        |
| 7  | 21630542  | G | A | LP-1      | MM     | sub | DNAH11 | c.2176G>A   | p.A726T  | missense   | 103 | 0.53        |
| X  | 44922760  | C | T | LP-1      | MM     | sub | KDM6A  | c.1621C>T   | p.Q541*  | nonsense   | 65  | 0.89        |
| 10 | 104160777 | C | T | MC-CAR    | MM     | sub | NFKB2  | c.2042C>T   | p.P681L  | missense   | 76  | 0.58        |
| 11 | 533874    | T | C | MC-CAR    | MM     | sub | HRAS   | c.182A>G    | p.Q61R   | missense   | 161 | 0.43        |
| 16 | 89838148  | C | T | MC-CAR    | MM     | sub | FANCA  | c.2089G>A   | p.V697I  | missense   | 145 | 0.49        |
| 19 | 1627422   | T | C | MC-CAR    | MM     | sub | TCF3   | c.302A>G    | p.K101R  | missense   | 94  | 0.521276596 |
| 4  | 106164897 | C | A | MC-CAR    | MM     | sub | TET2   | c.3765C>A   | p.Y1255* | nonsense   | 70  | 0.4         |
| 5  | 13716742  | C | A | MC-CAR    | MM     | sub | DNAH5  | c.12763G>T  | p.V4255F | missense   | 148 | 0.47        |
| 6  | 31549637  | C | T | MC-CAR    | MM     | sub | LTB    | c.163-1G>A  | p.?      | ess splice | 122 | 0.54        |
| 7  | 21657328  | C | G | MC-CAR    | MM     | sub | DNAH11 | c.4202C>G   | p.A1401G | missense   | 125 | 0.44        |
| 1  | 118166298 | A | G | MM1S      | MM     | sub | FAM46C | c.808A>G    | p.M270V  | missense   | 75  | 1           |
| 12 | 25398284  | C | G | MM1S      | MM     | sub | KRAS   | c.35G>C     | p.G12A   | missense   | 132 | 0.45        |
| 15 | 42046714  | A | G | MM1S      | MM     | sub | MGA    | c.7235A>G   | p.N2412S | missense   | 117 | 0.44        |
| 17 | 62125301  | C | A | MM1S      | MM     | sub | ERN1   | c.2446G>T   | p.D816Y  | missense   | 159 | 0.056603774 |
| 19 | 42798179  | C | G | MM1S      | MM     | sub | CIC    | c.4133C>G   | p.S1378C | missense   | 128 | 0.21        |
| 3  | 77657042  | C | G | MM1S      | MM     | sub | ROBO2  | c.3230C>G   | p.P1077R | missense   | 92  | 0.51        |
| 4  | 1962801   | G | A | MM1S      | MM     | sub | WHSC1  | c.3295G>A   | p.E1099K | missense   | 132 | 0.55        |
| 6  | 31549377  | T | C | MM1S      | MM     | sub | LTB    | c.239A>G    | p.E80G   | missense   | 54  | 0.56        |
| 7  | 55266457  | G | C | MM1S      | MM     | sub | EGFR   | c.2749G>C   | p.G917R  | missense   | 136 | 0.43        |

|    |           |   |   |           |        |     |         |            |          |            |     |             |
|----|-----------|---|---|-----------|--------|-----|---------|------------|----------|------------|-----|-------------|
| 9  | 139794917 | C | T | MM1S      | MM     | sub | TRAF2   | c.311C>T   | p.P104L  | missense   | 76  | 0.28        |
| 1  | 120471739 | C | T | MN-60     | non_MM | sub | NOTCH2  | c.3752G>A  | p.R1251H | missense   | 140 | 0.45        |
| 1  | 154574829 | C | T | MN-60     | non_MM | sub | ADAR    | c.289G>A   | p.V97M   | missense   | 328 | 0.33        |
| 1  | 23885728  | G | A | MN-60     | non_MM | sub | ID3     | c.190C>T   | p.L64F   | missense   | 113 | 1           |
| 1  | 27105553  | C | T | MN-60     | non_MM | sub | ARID1A  | c.5164C>T  | p.R1722* | nonsense   | 164 | 0.46        |
| 10 | 96076338  | C | T | MN-60     | non_MM | sub | PLCE1   | c.6167C>T  | p.T2056I | missense   | 197 | 0.32        |
| 11 | 70331800  | T | A | MN-60     | non_MM | sub | SHANK2  | c.4580A>T  | p.Y1527F | missense   | 189 | 0.058       |
| 11 | 92533581  | A | G | MN-60     | non_MM | sub | FAT3    | c.7402A>G  | p.N2468D | missense   | 188 | 0.41        |
| 12 | 18466970  | G | T | MN-60     | non_MM | sub | PIK3C2G | c.1109G>T  | p.R370M  | missense   | 213 | 0.36        |
| 13 | 73335914  | G | A | MN-60     | non_MM | sub | DIS3    | c.2381C>T  | p.A794V  | missense   | 352 | 0.2         |
| 15 | 41988349  | A | G | MN-60     | non_MM | sub | MGA     | c.1141A>G  | p.I381V  | missense   | 257 | 0.49        |
| 15 | 91347446  | C | T | MN-60     | non_MM | sub | BLM     | c.3608C>T  | p.A1203V | missense   | 200 | 0.42        |
| 17 | 41244703  | C | A | MN-60     | non_MM | sub | BRCA1   | c.2845G>T  | p.G949C  | missense   | 327 | 0.39        |
| 19 | 31767689  | G | A | MN-60     | non_MM | sub | TSHZ3   | c.3010C>T  | p.R1004W | missense   | 221 | 0.43        |
| 2  | 152383461 | C | T | MN-60     | non_MM | sub | NEB     | c.16813G>A | p.A5605T | missense   | 203 | 0.45        |
| 2  | 152507108 | C | T | MN-60     | non_MM | sub | NEB     | c.7207G>A  | p.V2403I | missense   | 211 | 0.43        |
| 20 | 44757522  | C | G | MN-60     | non_MM | sub | CD40    | c.677C>G   | p.A226G  | missense   | 122 | 0.48        |
| 20 | 57415192  | C | T | MN-60     | non_MM | sub | GNAS    | c.31C>T    | p.R11C   | missense   | 184 | 0.41        |
| 3  | 187446979 | G | T | MN-60     | non_MM | sub | BCL6    | c.1214C>A  | p.P405Q  | missense   | 171 | 0.32        |
| 3  | 37056036  | G | A | MN-60     | non_MM | sub | MLH1    | c.790+1G>A | p.?      | ess splice | 158 | 0.98        |
| 3  | 78680332  | T | C | MN-60     | non_MM | sub | ROBO1   | c.3488A>G  | p.Y1163C | missense   | 123 | 0.3         |
| 3  | 78683102  | C | T | MN-60     | non_MM | sub | ROBO1   | c.3347G>A  | p.R1116Q | missense   | 175 | 0.41        |
| 4  | 103528412 | G | A | MN-60     | non_MM | sub | NFKB1   | c.2060G>A  | p.R687H  | missense   | 129 | 0.52        |
| 4  | 126370746 | A | G | MN-60     | non_MM | sub | FAT4    | c.8575A>G  | p.T2859A | missense   | 257 | 0.082       |
| 4  | 1807533   | C | T | MN-60     | non_MM | sub | FGFR3   | c.1702C>T  | p.R568W  | missense   | 218 | 0.7         |
| 4  | 187509894 | T | C | MN-60     | non_MM | sub | FAT1    | c.13619A>G | p.Y4540C | missense   | 180 | 0.094       |
| 4  | 187629487 | T | C | MN-60     | non_MM | sub | FAT1    | c.1495A>G  | p.T499A  | missense   | 295 | 0.38        |
| 4  | 1918645   | G | A | MN-60     | non_MM | sub | WHSC1   | c.808G>A   | p.A270T  | missense   | 327 | 0.42        |
| 5  | 13708249  | G | A | MN-60     | non_MM | sub | DNAH5   | c.13321C>T | p.P4441S | missense   | 129 | 0.41        |
| 5  | 150922248 | T | C | MN-60     | non_MM | sub | FAT2    | c.8440A>G  | p.T2814A | missense   | 193 | 0.45        |
| 5  | 179676027 | T | A | MN-60     | non_MM | sub | MAPK9   | c.562A>T   | p.T188S  | missense   | 208 | 0.048       |
| 5  | 66459305  | C | T | MN-60     | non_MM | sub | MAST4   | c.3731C>T  | p.A1244V | missense   | 251 | 0.39        |
| 6  | 117678064 | G | A | MN-60     | non_MM | sub | ROS1    | c.3869C>T  | p.T1290I | missense   | 71  | 0.76        |
| 6  | 15513159  | G | A | MN-60     | non_MM | sub | JARID2  | c.3149G>A  | p.R1050H | missense   | 197 | 0.41        |
| 6  | 157454280 | C | A | MN-60     | non_MM | sub | ARID1B  | c.2277C>A  | p.S759R  | missense   | 222 | 0.5         |
| 6  | 161491676 | T | C | MN-60     | non_MM | sub | MAP3K4  | c.1744T>C  | p.Y582H  | missense   | 78  | 0.09        |
| 7  | 121651238 | A | G | MN-60     | non_MM | sub | PTPRZ1  | c.2138A>G  | p.Y713C  | missense   | 247 | 0.47        |
| 7  | 82595791  | G | A | MN-60     | non_MM | sub | PCLO    | c.3313C>T  | p.L1105F | missense   | 111 | 0.37        |
| 8  | 128750844 | C | G | MN-60     | non_MM | sub | MYC     | c.381C>G   | p.N127K  | missense   | 262 | 0.58        |
| 8  | 128750921 | T | C | MN-60     | non_MM | sub | MYC     | c.458T>C   | p.F153S  | missense   | 266 | 0.52        |
| 8  | 77616672  | A | C | MN-60     | non_MM | sub | ZFH4    | c.349A>C   | p.S117R  | missense   | 265 | 0.41        |
| 9  | 21971120  | G | A | MN-60     | non_MM | sub | CDKN2A  | c.238C>T   | p.R80*   | nonsense   | 213 | 0.990610329 |
| 9  | 87425481  | C | T | MN-60     | non_MM | sub | NTRK2   | c.1421C>T  | p.P474L  | missense   | 111 | 0.33        |
| 1  | 115258744 | C | T | NCI-H929  | MM     | sub | NRAS    | c.38G>A    | p.G13D   | missense   | 150 | 0.52        |
| 11 | 108117828 | G | A | NCI-H929  | MM     | sub | ATM     | c.1039G>A  | p.E347K  | missense   | 296 | 0.28        |
| 12 | 459807    | T | C | NCI-H929  | MM     | sub | KDM5A   | c.1288A>G  | p.K430E  | missense   | 107 | 0.5         |
| 13 | 32937341  | A | G | NCI-H929  | MM     | sub | BRCA2   | c.8002A>G  | p.R2668G | missense   | 53  | 1           |
| 15 | 42059075  | C | G | NCI-H929  | MM     | sub | MGA     | c.8942C>G  | p.S2981C | missense   | 164 | 0.61        |
| 19 | 47193921  | A | G | NCI-H929  | MM     | sub | PRKD2   | c.1745T>C  | p.I582T  | missense   | 59  | 0.61        |
| 2  | 61761029  | G | C | NCI-H929  | MM     | sub | XPO1    | c.4C>G     | p.P2A    | missense   | 158 | 0.4         |
| 6  | 117622256 | C | A | NCI-H929  | MM     | sub | ROS1    | c.6614G>T  | p.R2205I | missense   | 117 | 0.5         |
| 6  | 51523918  | G | A | NCI-H929  | MM     | sub | PKHD1   | c.11006C>T | p.S3669L | missense   | 121 | 0.53        |
| 7  | 121651510 | G | A | NCI-H929  | MM     | sub | PTPRZ1  | c.2410G>A  | p.D804N  | missense   | 150 | 0.51        |
| X  | 39916496  | C | T | NCI-H929  | MM     | sub | BCOR    | c.4507G>A  | p.E1503K | missense   | 65  | 0.65        |
| 1  | 118166023 | A | C | OPM-2     | MM     | sub | FAM46C  | c.533A>C   | p.E178A  | missense   | 58  | 0.98        |
| 11 | 92531941  | G | T | OPM-2     | MM     | sub | FAT3    | c.5762G>T  | p.S1921I | missense   | 180 | 0.23        |
| 12 | 124817000 | T | C | OPM-2     | MM     | sub | NCOR2   | c.6790A>G  | p.K2264E | missense   | 96  | 0.49        |
| 13 | 73355008  | T | G | OPM-2     | MM     | sub | DIS3    | c.362A>C   | p.Y121S  | missense   | 81  | 1           |
| 17 | 11865517  | C | T | OPM-2     | MM     | sub | DNAH9   | c.13177C>T | p.R4393W | missense   | 129 | 0.52        |
| 17 | 16049706  | G | C | OPM-2     | MM     | sub | NCOR1   | c.1066C>G  | p.Q356E  | missense   | 194 | 0.18        |
| 17 | 7578406   | C | T | OPM-2     | MM     | sub | TP53    | c.524G>A   | p.R175H  | missense   | 62  | 0.97        |
| 2  | 141115674 | A | G | OPM-2     | MM     | sub | LRP1B   | c.11269T>C | p.Y3757H | missense   | 114 | 0.13        |
| 2  | 97215067  | G | A | OPM-2     | MM     | sub | ARID5A  | c.130G>A   | p.E44K   | missense   | 55  | 0.69        |
| 20 | 31022469  | G | A | OPM-2     | MM     | sub | ASXL1   | c.1954G>A  | p.G652S  | missense   | 129 | 0.643410853 |
| 3  | 193201748 | G | A | OPM-2     | MM     | sub | ATP13A4 | c.785C>T   | p.T262M  | missense   | 164 | 0.69        |
| 4  | 126402711 | A | G | OPM-2     | MM     | sub | FAT4    | c.12634A>G | p.K4212E | missense   | 180 | 0.17        |
| 4  | 1807889   | A | G | OPM-2     | MM     | sub | FGFR3   | c.1948A>G  | p.K650E  | missense   | 168 | 0.49        |
| 9  | 21971111  | G | A | OPM-2     | MM     | sub | CDKN2A  | c.247C>T   | p.H83Y   | missense   | 115 | 0.3         |
| 1  | 16255925  | A | G | RPMI-8226 | MM     | sub | SPEN    | c.3190A>G  | p.K1064E | missense   | 201 | 0.43        |
| 1  | 45797105  | C | T | RPMI-8226 | MM     | sub | MUTYH   | c.1310G>A  | p.R437Q  | missense   | 119 | 0.58        |
| 12 | 25398284  | C | G | RPMI-8226 | MM     | sub | KRAS    | c.35G>C    | p.G12A   | missense   | 118 | 0.67        |
| 12 | 40697769  | A | G | RPMI-8226 | MM     | sub | LRRK2   | c.3610A>G  | p.S1204G | missense   | 89  | 0.37        |
| 12 | 4409098   | C | T | RPMI-8226 | MM     | sub | CCND2   | c.793C>T   | p.Q265*  | nonsense   | 106 | 0.27        |
| 17 | 7577085   | C | T | RPMI-8226 | MM     | sub | TP53    | c.853G>A   | p.E285K  | missense   | 62  | 0.983870968 |
| 2  | 152507259 | C | G | RPMI-8226 | MM     | sub | NEB     | c.7056G>C  | p.K2352N | missense   | 190 | 0.28        |
| 21 | 44527564  | T | C | RPMI-8226 | MM     | sub | U2AF1   | c.41A>G    | p.D14G   | missense   | 109 | 0.17        |
| 6  | 31549590  | C | T | RPMI-8226 | MM     | sub | LTB     | c.208+1G>A | p.?      | ess splice | 131 | 0.65        |
| 6  | 31549591  | C | T | RPMI-8226 | MM     | sub | LTB     | c.208G>A   | p.G70R   | missense   | 128 | 0.66        |
| 6  | 395889    | G | A | RPMI-8226 | MM     | sub | IRF4    | c.446G>A   | p.S149N  | missense   | 118 | 0.330508475 |

|   |    |           |             |    |           |        |     |          |            |             |               |     |             |
|---|----|-----------|-------------|----|-----------|--------|-----|----------|------------|-------------|---------------|-----|-------------|
|   | 7  | 55242482  | C           | T  | RPMI-8226 | MM     | sub | EGFR     | c.2252C>T  | p.T751I     | missense      | 192 | 0.26        |
|   | 7  | 82581655  | C           | T  | RPMI-8226 | MM     | sub | PCLO     | c.8614G>A  | p.V2872I    | missense      | 214 | 0.39        |
|   | 9  | 139391079 | G           | C  | RPMI-8226 | MM     | sub | NOTCH1   | c.7112C>G  | p.T2371S    | missense      | 167 | 0.5         |
|   | 10 | 104156071 | A           | C  | RPMI-8866 | non_MM | sub | NFKB2    | c.83A>C    | p.K28T      | missense      | 174 | 0.48        |
|   | 11 | 102196238 | C           | T  | RPMI-8866 | non_MM | sub | BIRC3    | c.895C>T   | p.L299F     | missense      | 216 | 0.47        |
|   | 17 | 29684329  | A           | G  | RPMI-8866 | non_MM | sub | NF1      | c.7912A>G  | p.I2638V    | missense      | 207 | 0.49        |
|   | 17 | 78320643  | G           | T  | RPMI-8866 | non_MM | sub | RNF213   | c.2727G>T  | p.Q909H     | missense      | 133 | 0.5         |
|   | 2  | 140997075 | C           | T  | RPMI-8866 | non_MM | sub | LRP1B    | c.13351G>A | p.V4451I    | missense      | 184 | 0.45        |
|   | 2  | 141739747 | C           | A  | RPMI-8866 | non_MM | sub | LRP1B    | c.2869G>T  | p.D957Y     | missense      | 202 | 0.44        |
|   | 2  | 152387587 | G           | T  | RPMI-8866 | non_MM | sub | NEB      | c.16448C>A | p.A5483D    | missense      | 195 | 0.44        |
|   | 2  | 152515585 | C           | T  | RPMI-8866 | non_MM | sub | NEB      | c.6069G>A  | p.M2023I    | missense      | 282 | 0.489361702 |
|   | 2  | 152536299 | T           | C  | RPMI-8866 | non_MM | sub | NEB      | c.3191A>G  | p.Y1064C    | missense      | 150 | 0.493333333 |
|   | 22 | 21088073  | G           | A  | RPMI-8866 | non_MM | sub | P14KA    | c.3937C>T  | p.R1313C    | missense      | 146 | 0.48        |
|   | 3  | 193175245 | A           | T  | RPMI-8866 | non_MM | sub | ATP13A4  | c.1684T>A  | p.F562I     | missense      | 252 | 0.31        |
|   | 3  | 77614164  | C           | A  | RPMI-8866 | non_MM | sub | ROBO2    | c.1742C>A  | p.T581N     | missense      | 232 | 0.49        |
|   | 4  | 126239529 | T           | C  | RPMI-8866 | non_MM | sub | FAT4     | c.1963T>C  | p.Y655H     | missense      | 178 | 0.44        |
|   | 4  | 175897949 | T           | C  | RPMI-8866 | non_MM | sub | ADAM29   | c.1273T>C  | p.C425R     | missense      | 242 | 0.48        |
|   | 4  | 187629135 | C           | G  | RPMI-8866 | non_MM | sub | FAT1     | c.1847G>C  | p.S616T     | missense      | 217 | 0.5         |
|   | 4  | 55948163  | T           | G  | RPMI-8866 | non_MM | sub | KDR      | c.3808A>C  | p.K1270Q    | missense      | 177 | 0.44        |
|   | 5  | 112179398 | A           | G  | RPMI-8866 | non_MM | sub | APC      | c.8107A>G  | p.K2703E    | missense      | 242 | 0.49        |
|   | 5  | 13920635  | C           | T  | RPMI-8866 | non_MM | sub | DNAH5    | c.752G>A   | p.G251E     | missense      | 234 | 0.48        |
|   | 5  | 23526849  | T           | C  | RPMI-8866 | non_MM | sub | PRDM9    | c.1652T>C  | p.L551P     | missense      | 311 | 0.048       |
|   | 5  | 66396399  | G           | A  | RPMI-8866 | non_MM | sub | MAST4    | c.482G>A   | p.R161H     | missense      | 151 | 0.55        |
|   | 6  | 26056599  | C           | T  | RPMI-8866 | non_MM | sub | HIST1H1C | c.58G>A    | p.V20I      | missense      | 130 | 0.57        |
|   | 6  | 26157099  | C           | T  | RPMI-8866 | non_MM | sub | HIST1H1E | c.481C>T   | p.P161S     | missense      | 131 | 0.48        |
|   | 7  | 82785518  | C           | T  | RPMI-8866 | non_MM | sub | PCLO     | c.439G>A   | p.E147K     | missense      | 212 | 0.49        |
| X |    | 41205841  | T           | A  | RPMI-8866 | non_MM | sub | DDX3X    | c.1581T>A  | p.H527Q     | missense      | 202 | 0.52        |
|   | 12 | 124862822 | C           | T  | SK-MM-2   | MM     | sub | NCOR2    | c.2128G>A  | p.V710M     | missense      | 97  | 0.51        |
|   | 12 | 132512718 | C           | T  | SK-MM-2   | MM     | sub | EP400    | c.5263C>T  | p.R1755C    | missense      | 101 | 0.53        |
|   | 13 | 92408666  | A           | G  | SK-MM-2   | MM     | sub | GPC5     | c.1272A>G  | p.I424M     | missense      | 76  | 0.052631579 |
|   | 17 | 15968292  | G           | T  | SK-MM-2   | MM     | sub | NCOR1    | c.4993C>A  | p.P1665T    | missense      | 75  | 0.55        |
|   | 2  | 152506848 | T           | A  | SK-MM-2   | MM     | sub | NEB      | c.7273A>T  | p.S2425C    | missense      | 102 | 0.4         |
|   | 2  | 152525618 | G           | T  | SK-MM-2   | MM     | sub | NEB      | c.4534C>A  | p.L1512M    | missense      | 103 | 0.019417476 |
|   | 3  | 141248570 | G           | C  | SK-MM-2   | MM     | sub | RASA2    | c.376G>C   | p.E126Q     | missense      | 85  | 0.47        |
|   | 6  | 32190369  | G           | A  | SK-MM-2   | MM     | sub | NOTCH4   | c.370C>T   | p.P124S     | missense      | 65  | 0.45        |
| X |    | 15840962  | C           | A  | SK-MM-2   | MM     | sub | ZRSR2    | c.1046C>A  | p.S349Y     | missense      | 53  | 0.11        |
|   | 13 | 48934228  | A           | G  | U-266     | MM     | sub | RB1      | c.683A>G   | p.K228R     | missense      | 90  | 1           |
|   | 13 | 48951156  | G           | T  | U-266     | MM     | sub | RB1      | c.1318G>T  | p.E440*     | nonsense      | 51  | 0.98        |
|   | 15 | 91328204  | G           | A  | U-266     | MM     | sub | BLM      | c.2716G>A  | p.D906N     | missense      | 174 | 0.49        |
|   | 17 | 7578449   | C           | T  | U-266     | MM     | sub | TP53     | c.481G>A   | p.A161T     | missense      | 47  | 1           |
|   | 4  | 126370177 | T           | C  | U-266     | MM     | sub | FAT4     | c.8006T>C  | p.F2669S    | missense      | 215 | 0.49        |
|   | 6  | 26056416  | T           | A  | U-266     | MM     | sub | HIST1H1C | c.241A>T   | p.K81*      | nonsense      | 156 | 0.52        |
|   | 7  | 140453132 | T           | A  | U-266     | MM     | sub | BRAF     | c.1803A>T  | p.K601N     | missense      | 162 | 0.58        |
|   | 15 | 91292768  | TA          | T  | CTV-1     | MM     | ind | BLM      | NA         | p.N92fs*37  | frameshift_d  | 218 | 0.279816514 |
|   | 13 | 32910800  | AT          | A  | CTV-1     | MM     | ind | BRCA2    | NA         | p.L771fs*1  | frameshift_d  | 170 | 0.370588235 |
|   | 6  | 160485487 | CG          | C  | CTV-1     | MM     | ind | IGF2R    | NA         | p.D1317fs*2 | frameshift_d  | 176 | NO          |
|   | 14 | 95596485  | AT          | A  | CTV-1     | MM     | ind | DICER1   | NA         | p.N161fs*22 | frameshift_d  | 120 | 0.391666667 |
|   | 12 | 56492627  | AG          | A  | CTV-1     | MM     | ind | ERBB3    | NA         | p.E928fs*16 | frameshift_d  | 136 | 0.397058824 |
|   | 12 | 6499901   | TG          | T  | CTV-1     | MM     | ind | LTBR     | NA         | p.G371fs*42 | frameshift_d  | 109 | 0.403669725 |
|   | 5  | 66460200  | GC          | G  | CTV-1     | MM     | ind | MAST4    | NA         | p.P1544fs*1 | frameshift_d  | 142 | 0.443661972 |
|   | 15 | 42032391  | A           | AA | CTV-1     | MM     | ind | MGA      | NA         | p.R1575fs*2 | frameshift_ir | 142 | 0.387323944 |
|   | 11 | 58979362  | AG          | A  | CTV-1     | MM     | ind | MPEG1    | NA         | p.L326fs*2  | frameshift_d  | 111 | 0.423423423 |
|   | 3  | 170781744 | CA          | C  | CTV-1     | MM     | ind | TNIK     | NA         | p.F1336fs*1 | frameshift_d  | 100 | 0.51        |
|   | 16 | 72984639  | TC          | T  | CTV-1     | MM     | ind | ZFH3     | NA         | p.D982fs*87 | frameshift_d  | 119 | 0.428571429 |
|   | 16 | 72991665  | AG          | A  | CTV-1     | MM     | ind | ZFH3     | NA         | p.S794fs*30 | frameshift_d  | 101 | 0.425742574 |
|   | 2  | 9484896   | TA          | T  | KARPAS-45 | non_MM | ind | ASAP2    | NA         | p.N332fs*4  | frameshift_d  | 209 | 0.234449761 |
|   | 13 | 32913836  | CA          | C  | KARPAS-45 | non_MM | ind | BRCA2    | NA         | p.N1784fs*7 | frameshift_d  | 469 | 0.198294243 |
|   | 6  | 15496721  | TG          | T  | KARPAS-45 | non_MM | ind | JARID2   | NA         | p.R425fs*36 | frameshift_d  | 380 | 0.286842105 |
|   | 6  | 15496720  | GT          | G  | KARPAS-45 | non_MM | ind | JARID2   | NA         | p.V422fs*39 | frameshift_d  | 385 | 0.301298701 |
|   | 6  | 51618047  | TC          | T  | KARPAS-45 | non_MM | ind | PKHD1    | NA         | p.R2968fs*7 | frameshift_d  | 457 | 0.043763676 |
|   | 9  | 139793211 | AC          | A  | KARPAS-45 | non_MM | ind | TRAF2    | NA         | p.P9fs*77   | frameshift_d  | 129 | 0.07751938  |
|   | 10 | 63759905  | GTACCGCTCCG | A  | LP-1      | MM     | ind | ARID5B   | NA         | p.Y187_D19  | inframe_del   | 109 | 0.211009174 |
|   | 14 | 103363634 | AAGAGCATAA  | A  | LP-1      | MM     | ind | TRAF3    | NA         | p.K286fs*7  | frameshift_d  | 60  | 0.766666667 |
|   | 14 | 103372020 | GTCTTTGTGCG | A  | MM1S      | MM     | ind | TRAF3    | NA         | p.V536_N54  | complex sub   | 45  | 0.8         |
|   | 1  | 27099013  | GC          | G  | MN-60     | non_MM | ind | ARID1A   | NA         | p.Q1145fs*1 | frameshift_d  | 200 | 0.37        |
|   | 14 | 58814450  | G           | GA | MN-60     | non_MM | ind | ARID4A   | NA         | p.D423fs*24 | frameshift_ir | 218 | 0.403669725 |
|   | 6  | 41903745  | C           | CG | MN-60     | non_MM | ind | CCND3    | NA         | p.R271fs*53 | frameshift_ir | 211 | 0.379146919 |
|   | 5  | 150885188 | TG          | T  | MN-60     | non_MM | ind | FAT2     | NA         | p.N4330fs*6 | frameshift_d  | 246 | 0.345528455 |
|   | 4  | 153303351 | CA          | C  | MN-60     | non_MM | ind | FBXW7    | NA         | p.C46fs*5   | frameshift_d  | 223 | 0.255605381 |
|   | 6  | 15496728  | G           | GG | MN-60     | non_MM | ind | JARID2   | NA         | p.R425fs*99 | frameshift_ir | 233 | 0.248927039 |
|   | 15 | 42042482  | GA          | G  | MN-60     | non_MM | ind | MGA      | NA         | p.S2277fs*1 | frameshift_d  | 300 | 0.363333333 |
|   | 17 | 58740623  | CA          | C  | MN-60     | non_MM | ind | PPM1D    | NA         | p.N512fs*2  | frameshift_d  | 300 | 0.436666667 |
|   | 1  | 118165768 | T           | TC | NCI-H929  | MM     | ind | FAM46C   | NA         | p.I94fs*16  | frameshift_ir | 71  | 0.85915493  |
| X |    | 39932207  | C           | CA | RPMI-8866 | non_MM | ind | BCOR     | NA         | p.V798fs*19 | frameshift_ir | 253 | 0.438735178 |
|   | 14 | 103372062 | A           | AT | U-266     | MM     | ind | TRAF3    | NA         | p.K550fs*3  | frameshift_ir | 110 | 0.854545455 |
