# Supplementary material for: A DNA target-enrichment approach to detect mutations, copy number changes and immunoglobulin translocations in multiple myeloma
Source: PubMed Central journal article supplement (PMC5056967; doi:10.1038/bcj.2016.72), 2016-09-02
Supplement: bcj201672x8.pdf [file bcj201672x8.pdf]

|           |    |           |           |    |           |           |         |   |   |   |   |    |             |
|-----------|----|-----------|-----------|----|-----------|-----------|---------|---|---|---|---|----|-------------|
| KARPAS-45 | 8  | 125184244 | 125184279 | 14 | 106032718 | 106307018 | 8-_14+  | 2 | - | + | 2 | 0  | 30          |
| KARPAS-45 | 8  | 129414258 | 129414277 | 14 | 106164486 | 106164557 | 8-_14+  | 4 | - | + | 4 | 0  | 16.5        |
| KARPAS-45 | 11 | 65555114  | 65555254  | 14 | 106217536 | 107150979 | 11-_14- | 2 | - | - | 2 | 0  | 59.33333333 |
| KARPAS-45 | 11 | 67529282  | 67529357  | 14 | 107090627 | 107090702 | 11-_14- | 2 | - | - | 2 | 34 | 60          |
| KARPAS-45 | 11 | 68362658  | 68362696  | 14 | 106475773 | 107230031 | 11-_14- | 2 | - | - | 2 | 0  | 60          |
| KARPAS-45 | 8  | 125184242 | 125184277 | 14 | 106094679 | 106938501 | 8-_14-  | 2 | - | - | 2 | 0  | 10.5        |
| K-562     | 16 | 78131369  | 78131394  | 14 | 107174421 | 107174535 | 16+_14+ | 3 | + | + | 3 | 0  | 60          |
| K-562     | 8  | 125819524 | 125819546 | 14 | 106405297 | 106405384 | 8-_14+  | 2 | - | + | 2 | 0  | 60          |
| RPMI-8866 | 11 | 64929042  | 64929097  | 14 | 107280275 | 107280480 | 11+_14+ | 2 | + | + | 2 | 0  | 60          |
| RPMI-8866 | 8  | 125184242 | 125184273 | 14 | 106172984 | 106225713 | 8+_14+  | 2 | + | + | 2 | 0  | 1           |
| RPMI-8866 | 16 | 79223819  | 79223841  | 14 | 106214795 | 107105825 | 16+_14- | 2 | + | - | 2 | 0  | 30          |
| RPMI-8866 | 8  | 127426547 | 127426580 | 14 | 107190968 | 107191057 | 8+_14-  | 2 | + | - | 2 | 0  | 42.25       |
| RPMI-8866 | 8  | 129414258 | 129414277 | 14 | 106164547 | 106164566 | 8-_14+  | 2 | - | + | 2 | 0  | 11.5        |
| RPMI-8866 | 8  | 125184244 | 125184276 | 14 | 106025319 | 106211272 | 8-_14-  | 2 | - | - | 2 | 0  | 9.66666667  |
