# Supplementary material for: A DNA target-enrichment approach to detect mutations, copy number changes and immunoglobulin translocations in multiple myeloma
Source: PubMed Central journal article supplement (PMC5056967; doi:10.1038/bcj.2016.72), 2016-09-02
Supplement: bcj201672x9.pdf [file bcj201672x9.pdf]

| cell_lines | chr_h | h5        | h3        | chr_l | IS        | IS        | sample | normal  | qual_h      | qual_l      | size       | quality | depth | coord                                   | n_of_duplicates                         | high_confidence |
|------------|-------|-----------|-----------|-------|-----------|-----------|--------|---------|-------------|-------------|------------|---------|-------|-----------------------------------------|-----------------------------------------|-----------------|
| ARRH-77    | 14    | 106072000 | 106076000 | 14    | 106076000 | 106080000 | 204    | ARRH-77 | 29          | 24.2401961  | 24.7647059 | 4000    | FALSE | FALSE                                   | 106072000_106076000_106076000_106080000 | 17              |
| ARRH-77    | 14    | 106082500 | 106086500 | 14    | 106103500 | 106107500 | 22     | 0       | 11.81818182 | 3.68181818  | 21000      | FALSE   | TRUE  | 106082500_106086500_106103500_106107500 | 6                                       |                 |
| ARRH-77    | 14    | 106098500 | 106102500 | 14    | 106192000 | 106196000 | 1      | 0       | 60          | 0           | 93500      | FALSE   | FALSE | 106098500_106102500_106192000_106196000 | 2                                       |                 |
| ARRH-77    | 14    | 106173000 | 106177000 | 14    | 106324500 | 106328500 | 1      | 0       | 0           | 35          | 151500     | FALSE   | FALSE | 106173000_106177000_106324500_106328500 | 1                                       |                 |
| ARRH-77    | 14    | 106208000 | 106212000 | 14    | 106245000 | 106249500 | 49     | 0       | 48.244898   | 60          | 116500     | TRUE    | TRUE  | 106208000_106212000_106245000_106249500 | 2                                       |                 |
| ARRH-77    | 14    | 106235000 | 106239500 | 14    | 106233200 | 106237200 | 11     | 0       | 55.5454545  | 9           | 40900      | TRUE    | TRUE  | 106235000_106239500_106233200_106237200 | 1                                       |                 |
| ARRH-77    | 14    | 106072000 | 106076000 | 14    | 106118927 | 106119413 | 8      | 0       | 13.625      | 2.375       | 45170      | FALSE   | FALSE | 106072000_106076000_106118927_106119413 | 1                                       |                 |
| ARRH-77    | 14    | 106072000 | 106076000 | 14    | 106120824 | 106121164 | 2      | 1       | 22          | 23.5        | 46994      | FALSE   | FALSE | 106072000_106076000_106120824_106121164 | 1                                       |                 |
| ARRH-77    | 14    | 106072000 | 106076000 | 14    | 106217823 | 106218246 | 5      | 0       | 8.2         | 3.6         | 144034.5   | FALSE   | FALSE | 106072000_106076000_106217823_106218246 | 1                                       |                 |
| ARRH-77    | 14    | 106082500 | 106086500 | 14    | 106102226 | 106102293 | 8      | 1       | 44.625      | 1           | 17759.5    | TRUE    | FALSE | 106082500_106086500_106102226_106102293 | 1                                       |                 |
| ARRH-77    | 14    | 106082500 | 106086500 | 14    | 106102498 | 106102570 | 3      | 0       | 14.33333333 | 7.33333333  | 18034      | FALSE   | FALSE | 106082500_106086500_106102498_106102570 | 1                                       |                 |
| ARRH-77    | 14    | 106082500 | 106086500 | 14    | 106128151 | 106128496 | 3      | 1       | 0           | 15.33333333 | 43823.5    | FALSE   | FALSE | 106082500_106086500_106128151_106128496 | 1                                       |                 |
| ARRH-77    | 14    | 106082500 | 106086500 | 14    | 106129171 | 106129433 | 2      | 0       | 0           | 0           | 44802      | FALSE   | FALSE | 106082500_106086500_106129171_106129433 | 1                                       |                 |
| ARRH-77    | 14    | 106082500 | 106086500 | 14    | 106198232 | 106198347 | 2      | 0       | 3.5         | 5           | 113789.5   | FALSE   | FALSE | 106082500_106086500_106198232_106198347 | 1                                       |                 |
| ARRH-77    | 14    | 106082500 | 106086500 | 14    | 106200472 | 106200820 | 13     | 0       | 11          | 0           | 116146     | FALSE   | TRUE  | 106082500_106086500_106200472_106200820 | 1                                       |                 |
| ARRH-77    | 14    | 106082500 | 106086500 | 14    | 106201082 | 106201493 | 5      | 0       | 0           | 10.4        | 116877.5   | FALSE   | FALSE | 106082500_106086500_106201082_106201493 | 1                                       |                 |
| ARRH-77    | 14    | 106082500 | 106086500 | 14    | 106202196 | 106202350 | 3      | 0       | 31          | 0           | 117658.5   | FALSE   | FALSE | 106082500_106086500_106202196_106202350 | 1                                       |                 |
| ARRH-77    | 14    | 106082500 | 106086500 | 14    | 106227198 | 106227616 | 35     | 6       | 44.8285714  | 53.0285714  | 142907     | TRUE    | FALSE | 106082500_106086500_106227198_106227616 | 1                                       |                 |
| ARRH-77    | 14    | 106082500 | 106086500 | 14    | 106230100 | 106230425 | 3      | 0       | 3           | 0           | 145762.5   | FALSE   | FALSE | 106082500_106086500_106230100_106230425 | 1                                       |                 |
| ARRH-77    | 14    | 106094675 | 106094749 | 14    | 106095000 | 106099000 | 2      | 0       | 55.5        | 52.75       | 2288       | TRUE    | FALSE | 106094675_106094749_106095000_106099000 | 1                                       |                 |
| ARRH-77    | 14    | 106098500 | 106102500 | 14    | 106197182 | 106197327 | 4      | 0       | 1.5         | 18.75       | 96754.5    | FALSE   | FALSE | 106098500_106102500_106197182_106197327 | 1                                       |                 |
| ARRH-77    | 14    | 106098500 | 106102500 | 14    | 106225521 | 106225595 | 7      | 0       | 10          | 14          | 125058     | FALSE   | FALSE | 106098500_106102500_106225521_106225595 | 1                                       |                 |
| ARRH-77    | 14    | 106098500 | 106102500 | 14    | 106226346 | 106226919 | 5      | 1       | 3.4         | 12.4        | 126132.5   | FALSE   | FALSE | 106098500_106102500_106226346_106226919 | 1                                       |                 |
| ARRH-77    | 14    | 106088147 | 106088361 | 14    | 106103500 | 106107500 | 3      | 0       | 9           | 0           | 17246      | FALSE   | FALSE | 106088147_106088361_106103500_106107500 | 1                                       |                 |
| ARRH-77    | 14    | 106143000 | 106147000 | 14    | 106147205 | 106147311 | 13     | 0       | 0.769231    | 14.0769231  | 2258       | FALSE   | TRUE  | 106143000_106147000_106147205_106147311 | 1                                       |                 |
| ARRH-77    | 14    | 106045694 | 106045800 | 14    | 106163500 | 106167500 | 3      | 1       | 0           | 0           | 119753     | FALSE   | FALSE | 106045694_106045800_106163500_106167500 | 1                                       |                 |
| ARRH-77    | 14    | 106046126 | 106046522 | 14    | 106163500 | 106167500 | 10     | 0       | 4           | 6.1         | 119176     | FALSE   | TRUE  | 106046126_106046522_106163500_106167500 | 1                                       |                 |
| ARRH-77    | 14    | 106163158 | 106163299 | 14    | 106163500 | 106167500 | 5      | 0       | 16.0714286  | 16.0714286  | 2271.5     | FALSE   | FALSE | 106163158_106163299_106163500_106167500 | 1                                       |                 |
| ARRH-77    | 14    | 106173000 | 106177000 | 14    | 106177211 | 106177379 | 8      | 0       | 59          | 60          | 2295       | TRUE    | FALSE | 106173000_106177000_106177211_106177379 | 1                                       |                 |
| ARRH-77    | 14    | 106123981 | 106124118 | 14    | 106192000 | 106196000 | 2      | 0       | 0           | 0           | 69950.5    | FALSE   | FALSE | 106123981_106124118_106192000_106196000 | 1                                       |                 |
| ARRH-77    | 14    | 106191673 | 106191795 | 14    | 106192000 | 106196000 | 5      | 1       | 25.9230769  | 22.9230769  | 2266       | FALSE   | FALSE | 106191673_106191795_106192000_106196000 | 1                                       |                 |
| ARRH-77    | 14    | 106196000 | 106200000 | 14    | 106200214 | 106200376 | 6      | 1       | 60          | 60          | 2295       | FALSE   | FALSE | 106196000_106200000_106200214_106200376 | 1                                       |                 |
| ARRH-77    | 14    | 106196000 | 106200000 | 14    | 106227200 | 106227350 | 2      | 0       | 11          | 26          | 29275      | FALSE   | FALSE | 106196000_106200000_106227200_106227350 | 1                                       |                 |
| ARRH-77    | 14    | 106196000 | 106200000 | 14    | 106227598 | 106227698 | 3      | 0       | 19.6666667  | 1           | 29648      | FALSE   | FALSE | 106196000_106200000_106227598_106227698 | 1                                       |                 |
| ARRH-77    | 14    | 106208000 | 106212000 | 14    | 106238410 | 106238481 | 7      | 0       | 35.2857143  | 45.8571429  | 28355.5    | TRUE    | FALSE | 106208000_106212000_106238410_106238481 | 1                                       |                 |
| ARRH-77    | 14    | 106208000 | 106212000 | 14    | 106239103 | 106239203 | 6      | 0       | 19.5        | 8           | 29153      | FALSE   | FALSE | 106208000_106212000_106239103_106239203 | 1                                       |                 |
| ARRH-77    | 14    | 106796134 | 106796285 | 14    | 106796500 | 106800500 | 4      | 7       | 32.6        | 31.6        | 2290.5     | TRUE    | FALSE | 106796134_106796285_106796500_106800500 | 1                                       |                 |
| ARRH-77    | 14    | 106941000 | 106945000 | 14    | 106945210 | 106945413 | 12     | 6       | 60          | 60          | 2311.5     | TRUE    | FALSE | 106941000_106945000_106945210_106945413 | 1                                       |                 |
| ARRH-77    | 14    | 107076500 | 107080500 | 14    | 107083254 | 107083462 | 25     | 0       | 37.68       | 0           | 4858       | FALSE   | TRUE  | 107076500_107080500_107083254_107083462 | 1                                       |                 |
| ARRH-77    | 14    | 107076500 | 107080500 | 14    | 107095124 | 107095282 | 30     | 0       | 37.63333333 | 0           | 16703      | FALSE   | TRUE  | 107076500_107080500_107095124_107095282 | 1                                       |                 |
| ARRH-77    | 14    | 107076500 | 107080500 | 14    | 107153649 | 107153766 | 2      | 0       | 0           | 0           | 75207.5    | FALSE   | FALSE | 107076500_107080500_107153649_107153766 | 1                                       |                 |
| ARRH-77    | 14    | 107086685 | 107086976 | 14    | 107097000 | 107101000 | 14     | 12      | 0           | 6.28571429  | 12169.5    | FALSE   | FALSE | 107086685_107086976_107097000_107101000 | 1                                       |                 |
| ARRH-77    | 14    | 107087195 | 107087296 | 14    | 107097000 | 107101000 | 3      | 3       | 56.6666667  | 4           | 11754.5    | TRUE    | FALSE | 107087195_107087296_107097000_107101000 | 1                                       |                 |
| ARRH-77    | 14    | 107096689 | 107096763 | 14    | 107097000 | 107101000 | 4      | 5       | 38.16666667 | 36.83333333 | 2274       | FALSE   | FALSE | 107096689_107096763_107097000_107101000 | 1                                       |                 |
| ARRH-77    | 14    | 107093118 | 107093393 | 14    | 107271500 | 107275500 | 2      | 0       | 48          | 25          | 180244.5   | TRUE    | FALSE | 107093118_107093393_107271500_107275500 | 1                                       |                 |
| ARRH-77    | 14    | 107271107 | 107271285 | 14    | 107271500 | 107275500 | 4      | 14      | 51.6875     | 53.625      | 2304       | FALSE   | FALSE | 107271107_107271285_107271500_107275500 | 1                                       |                 |
| KMS-12-BM  | 14    | 106022500 | 106026500 | 14    | 106143500 | 106147500 | 22     | 0       | 5.31818182  | 5.45454545  | 121000     | FALSE   | TRUE  | 106022500_106026500_106143500_106147500 | 1                                       |                 |
| KMS-12-BM  | 14    | 106047500 | 106051500 | 14    | 106160000 | 106168000 | 1      | 0       | 50          | 0           | 116500     | FALSE   | TRUE  | 106047500_106051500_106160000_106168000 | 3                                       |                 |
| KMS-12-BM  | 14    | 106078500 | 106082500 | 14    | 106223500 | 106227500 | 30     | 3       | 26.6956522  | 44.0869565  | 145000     | TRUE    | FALSE | 106078500_106082500_106223500_106227500 | 1                                       |                 |
| KMS-12-BM  | 14    | 106090500 | 106094500 | 14    | 106092500 | 106096500 | 21     | 29      | 28.383871   | 30.2536302  | 2000       | TRUE    | FALSE | 106090500_106094500_106092500_106096500 | 1                                       |                 |
| KMS-12-BM  | 14    | 106090500 | 106094500 | 14    | 106108000 | 106112000 | 7      | 0       | 2.28571429  | 4.57142857  | 17500      | FALSE   | FALSE | 106090500_106094500_106108000_106112000 | 1                                       |                 |
| KMS-12-BM  | 14    | 106102000 | 106106000 | 14    | 106104500 | 106108500 | 2311   | 15      | 14.521852   | 14.3601732  | 2500       | FALSE   | FALSE | 106102000_106106000_106104500_106108500 | 4                                       |                 |
| KMS-12-BM  | 14    | 106106500 | 106110500 | 14    | 106108000 | 106112000 | 4968   | 11      | 43.218599   | 43.205567   | 1500       | TRUE    | FALSE | 106106500_106110500_106108000_106112000 | 1                                       |                 |
| KMS-12-BM  | 14    | 106209000 | 106213000 | 14    | 106238500 | 106242500 | 16     | 0       | 9.1875      | 36.625      | 29500      | FALSE   | TRUE  | 106209000_106213000_106238500_106242500 | 2                                       |                 |
| KMS-12-BM  | 14    | 106820000 | 106824000 | 14    | 107265500 | 107269500 | 1      | 0       | 0           | 60          | 445500     | FALSE   | TRUE  | 106820000_106824000_107265500_107269500 | 1                                       |                 |
| KMS-12-BM  | 14    | 107262000 | 107266000 | 14    | 107265500 | 107269500 | 14     | 14      | 47.4545455  | 49.8181818  | 3500       | TRUE    | FALSE | 107262000_107266000_107265500_107269500 | 1                                       |                 |
| KMS-12-BM  | 14    | 107268500 | 107272500 | 14    | 107271500 | 107275500 | 299    | 372     | 47.4297189  | 53.3815261  | 3000       | TRUE    | FALSE | 107268500_107272500_107271500_107275500 | 15                                      |                 |
| KMS-12-BM  | 14    | 106026686 | 106026796 | 14    | 106031500 | 106031500 | 3      | 0       | 0           | 3           | 2259       | FALSE   | FALSE | 106026686_106026796_106031500_106031500 | 1                                       |                 |
| KMS-12-BM  | 14    | 106031133 | 106031292 | 14    | 106031500 | 106031500 | 2      |         |             |             |            |         |       |                                         |                                         |                 |

|           |    |           |           |    |           |           |      |     |            |            |          |       |       |                                         |    |
|-----------|----|-----------|-----------|----|-----------|-----------|------|-----|------------|------------|----------|-------|-------|-----------------------------------------|----|
| KMS-12-BM | 14 | 106820000 | 106824000 | 14 | 107104826 | 107104900 | 2    | 2   | 5          | 5          | 282863   | FALSE | FALSE | 106820000_106824000_107104826_107104900 | 1  |
| KMS-12-BM | 14 | 106539079 | 106539163 | 14 | 107168000 | 107172000 | 4    | 0   | 0          | 27.4       | 630879   | FALSE | FALSE | 106539079_106539163_107168000_107172000 | 1  |
| KMS-12-BM | 14 | 106967049 | 106967123 | 14 | 107168000 | 107172000 | 2    | 0   | 0          | 42.6666667 | 202914   | FALSE | FALSE | 106967049_106967123_107168000_107172000 | 1  |
| KMS-12-BM | 14 | 107093188 | 107093258 | 14 | 107271500 | 107275500 | 8    | 0   | 55.125     | 42.125     | 180142   | TRUE  | FALSE | 107093188_107093258_107271500_107275500 | 1  |
| L-363     | 14 | 106098500 | 106102500 | 14 | 106125666 | 106125849 | 2    | 0   | 29.5       | 6.5        | 25257.5  | FALSE | FALSE | 106098500_106102500_106125666_106125849 | 1  |
| L-363     | 14 | 106098500 | 106102500 | 14 | 106226593 | 106226663 | 2    | 0   | 0          | 0          | 126128   | FALSE | FALSE | 106098500_106102500_106226593_106226663 | 1  |
| L-363     | 14 | 106084261 | 106107500 | 14 | 106107500 | 106107500 | 13   | 0   | 10.8181818 | 6.45454545 | 215.5    | FALSE | FALSE | 106084261_106107500_106107500_106107500 | 1  |
| L-363     | 14 | 106085150 | 106085333 | 14 | 106103500 | 106107500 | 2    | 0   | 0          | 0          | 20258.5  | FALSE | FALSE | 106085150_106085333_106103500_106107500 | 1  |
| L-363     | 14 | 106087739 | 106088028 | 14 | 106103500 | 106107500 | 2    | 0   | 14.5       | 4          | 17616.5  | FALSE | FALSE | 106087739_106088028_106103500_106107500 | 1  |
| L-363     | 14 | 106070603 | 106070688 | 14 | 106189000 | 106193000 | 6    | 1   | 11.8       | 0          | 120354.5 | FALSE | FALSE | 106070603_106070688_106189000_106193000 | 1  |
| L-363     | 14 | 106121422 | 106121909 | 14 | 106189000 | 106193000 | 3    | 2   | 10.3333333 | 12.3333333 | 69334.5  | FALSE | FALSE | 106121422_106121909_106189000_106193000 | 1  |
| L-363     | 14 | 106203000 | 106207000 | 14 | 106234757 | 106234844 | 2    | 0   | 0          | 0          | 29800.5  | FALSE | FALSE | 106203000_106207000_106234757_106234844 | 1  |
| L-363     | 14 | 106778220 | 106778294 | 14 | 106787500 | 106782500 | 2    | 13  | 60         | 60         | 2243     | TRUE  | FALSE | 106778220_106778294_106787500_106782500 | 1  |
| LP-1      | 14 | 106072000 | 106076000 | 14 | 106076000 | 106080000 | 171  | 29  | 26.7777778 | 27.0818173 | 4000     | FALSE | FALSE | 106072000_106076000_106076000_106080000 | 17 |
| LP-1      | 14 | 106072000 | 106076000 | 14 | 106095000 | 106099000 | 1    | 0   | 0          | 60         | 23000    | FALSE | FALSE | 106072000_106076000_106095000_106099000 | 1  |
| LP-1      | 14 | 106134500 | 106138500 | 14 | 106137500 | 106141500 | 1164 | 84  | 28.8075601 | 27.083405  | 3000     | FALSE | FALSE | 106134500_106138500_106137500_106141500 | 3  |
| LP-1      | 14 | 107262000 | 107269500 | 14 | 107265500 | 107269500 | 5    | 14  | 60         | 48         | 3500     | TRUE  | FALSE | 107262000_107269500_107265500_107269500 | 15 |
| LP-1      | 14 | 107268500 | 107272500 | 14 | 107271500 | 107275500 | 394  | 372 | 46.5888325 | 52.2918782 | 3000     | TRUE  | FALSE | 107268500_107272500_107271500_107275500 | 15 |
| LP-1      | 14 | 106072000 | 106076000 | 14 | 106119118 | 106119413 | 1    | 0   | 10.1111111 | 5          | 45265.5  | FALSE | FALSE | 106072000_106076000_106119118_106119413 | 1  |
| LP-1      | 14 | 106072000 | 106076000 | 14 | 106120731 | 106120952 | 2    | 0   | 0          | 4          | 48661.5  | FALSE | FALSE | 106072000_106076000_106120731_106120952 | 1  |
| LP-1      | 14 | 106072000 | 106076000 | 14 | 106121249 | 106121935 | 4    | 2   | 15         | 6          | 47592    | FALSE | FALSE | 106072000_106076000_106121249_106121935 | 1  |
| LP-1      | 14 | 106072000 | 106076000 | 14 | 106218011 | 106218073 | 3    | 0   | 0          | 19         | 144042   | FALSE | FALSE | 106072000_106076000_106218011_106218073 | 1  |
| LP-1      | 14 | 106072000 | 106076000 | 14 | 106218639 | 106218770 | 2    | 1   | 0          | 5          | 144704.5 | FALSE | FALSE | 106072000_106076000_106218639_106218770 | 1  |
| LP-1      | 14 | 106094679 | 106094796 | 14 | 106095000 | 106099000 | 4    | 0   | 54.0769231 | 52.2307692 | 2262.5   | TRUE  | FALSE | 106094679_106094796_106095000_106099000 | 1  |
| LP-1      | 14 | 106098500 | 106102500 | 14 | 106125521 | 106125859 | 2    | 0   | 45         | 0          | 25190    | FALSE | FALSE | 106098500_106102500_106125521_106125859 | 1  |
| LP-1      | 14 | 106098500 | 106102500 | 14 | 106197023 | 106197592 | 9    | 0   | 5.7777778  | 10.1111111 | 96807.5  | FALSE | FALSE | 106098500_106102500_106197023_106197592 | 1  |
| LP-1      | 14 | 106098500 | 106102500 | 14 | 106198115 | 106198251 | 2    | 0   | 12.5       | 20         | 97683    | FALSE | FALSE | 106098500_106102500_106198115_106198251 | 1  |
| LP-1      | 14 | 106098500 | 106102500 | 14 | 106226571 | 106226631 | 2    | 0   | 3.5        | 14.5       | 126101   | FALSE | FALSE | 106098500_106102500_106226571_106226631 | 1  |
| LP-1      | 14 | 106085758 | 106086065 | 14 | 106129000 | 106133000 | 2    | 0   | 30         | 0          | 45088.5  | FALSE | FALSE | 106085758_106086065_106129000_106133000 | 1  |
| LP-1      | 14 | 106088193 | 106088271 | 14 | 106129000 | 106133000 | 4    | 0   | 0          | 12.1       | 42768    | FALSE | FALSE | 106088193_106088271_106129000_106133000 | 1  |
| LP-1      | 14 | 106012072 | 106013265 | 14 | 106137500 | 106141500 | 16   | 7   | 11.0625    | 0.8125     | 126831.5 | FALSE | FALSE | 106012072_106013265_106137500_106141500 | 1  |
| LP-1      | 14 | 106013638 | 106013917 | 14 | 106137500 | 106141500 | 2    | 1   | 5          | 22         | 125722.5 | FALSE | FALSE | 106013638_106013917_106137500_106141500 | 1  |
| LP-1      | 14 | 106035708 | 106035977 | 14 | 106154000 | 106158000 | 25   | 19  | 21.2916667 | 33         | 120157.5 | TRUE  | FALSE | 106035708_106035977_106154000_106158000 | 1  |
| LP-1      | 14 | 106153657 | 106153794 | 14 | 106154000 | 106158000 | 1    | 0   | 58.2       | 42         | 2274.5   | TRUE  | FALSE | 106153657_106153794_106154000_106158000 | 1  |
| LP-1      | 14 | 106045369 | 106047015 | 14 | 106164000 | 106168000 | 27   | 1   | 1.37037037 | 6.5        | 119808   | FALSE | FALSE | 106045369_106047015_106164000_106168000 | 1  |
| LP-1      | 14 | 106048043 | 106048458 | 14 | 106164000 | 106168000 | 3    | 0   | 0          | 47         | 117569.5 | FALSE | FALSE | 106048043_106048458_106164000_106168000 | 1  |
| LP-1      | 14 | 106163723 | 106163799 | 14 | 106164000 | 106168000 | 2    | 1   | 12.0909091 | 11.7272727 | 2239     | FALSE | FALSE | 106163723_106163799_106164000_106168000 | 1  |
| LP-1      | 14 | 106165500 | 106169500 | 14 | 106169728 | 106169883 | 5    | 0   | 33.2       | 41         | 2305.5   | TRUE  | FALSE | 106165500_106169500_106169728_106169883 | 1  |
| LP-1      | 14 | 106173000 | 106177000 | 14 | 106177657 | 106177852 | 10   | 0   | 55.7       | 49.1       | 2754.5   | TRUE  | TRUE  | 106173000_106177000_106177657_106177852 | 1  |
| LP-1      | 14 | 106070612 | 106070780 | 14 | 106189000 | 106193000 | 9    | 1   | 4.375      | 0          | 120304   | FALSE | FALSE | 106070612_106070780_106189000_106193000 | 1  |
| LP-1      | 14 | 106094181 | 106094259 | 14 | 106325000 | 106329000 | 2    | 0   | 0          | 60         | 232780   | FALSE | FALSE | 106094181_106094259_106325000_106329000 | 1  |
| IM-9      | 14 | 106072000 | 106076000 | 14 | 106076000 | 106080000 | 206  | 29  | 22.6992921 | 22.5048544 | 4000     | FALSE | FALSE | 106072000_106076000_106076000_106080000 | 17 |
| IM-9      | 14 | 106072000 | 106076000 | 14 | 106119129 | 106119407 | 5    | 0   | 8.2        | 5.2        | 45268    | FALSE | FALSE | 106072000_106076000_106119129_106119407 | 1  |
| LP-1      | 14 | 106328000 | 106332000 | 14 | 106815758 | 106815842 | 7    | 0   | 60         | 0          | 485800   | FALSE | FALSE | 106328000_106332000_106815758_106815842 | 1  |
| LP-1      | 14 | 106328000 | 106332000 | 14 | 107131035 | 107131109 | 3    | 0   | 0          | 60         | 801072   | FALSE | FALSE | 106328000_106332000_107131035_107131109 | 1  |
| LP-1      | 14 | 106431142 | 106431294 | 14 | 106431500 | 106433500 | 3    | 5   | 40.6666667 | 37.3333333 | 2282     | TRUE  | FALSE | 106431142_106431294_106431500_106433500 | 1  |
| LP-1      | 14 | 106701695 | 106701769 | 14 | 106702000 | 106706000 | 2    | 6   | 58         | 46.3333333 | 2268     | TRUE  | FALSE | 106701695_106701769_106702000_106706000 | 1  |
| LP-1      | 14 | 106725500 | 106729500 | 14 | 106729707 | 106729791 | 8    | 5   | 60         | 60         | 2249     | TRUE  | FALSE | 106725500_106729500_106729707_106729791 | 1  |
| LP-1      | 14 | 106777638 | 106777785 | 14 | 106782000 | 106782000 | 4    | 6   | 56         | 56.3333333 | 2288.5   | TRUE  | FALSE | 106777638_106777785_106782000_106782000 | 1  |
| LP-1      | 14 | 106799182 | 106799231 | 14 | 107271500 | 107275500 | 2    | 0   | 17         | 2          | 474293.5 | FALSE | FALSE | 106799182_106799231_107271500_107275500 | 1  |
| OPM-2     | 14 | 107093177 | 107093536 | 14 | 107271500 | 107275500 | 7    | 0   | 57.2857143 | 40.7142857 | 180145.5 | TRUE  | FALSE | 107093177_107093536_107271500_107275500 | 1  |
| OPM-2     | 14 | 106023000 | 106027000 | 14 | 106143959 | 106144215 | 3    | 0   | 0          | 1.6666667  | 119087   | FALSE | FALSE | 106023000_106027000_106143959_106144215 | 1  |
| OPM-2     | 14 | 106023000 | 106027000 | 14 | 106144606 | 106144887 | 3    | 0   | 20.3333333 | 0          | 119746.5 | FALSE | FALSE | 106023000_106027000_106144606_106144887 | 1  |
| OPM-2     | 14 | 106023000 | 106027000 | 14 | 106145525 | 106145525 | 13   | 0   | 12.6923077 | 2.6666667  | 120989   | TRUE  | TRUE  | 106023000_106027000_106145525_106145525 | 1  |
| OPM-2     | 14 | 106023000 | 106027000 | 14 | 106147149 | 106147410 | 3    | 0   | 0          | 6          | 122279.5 | FALSE | FALSE | 106023000_106027000_106147149_106147410 | 1  |
| OPM-2     | 14 | 106047500 | 106051500 | 14 | 106169521 | 106169581 | 2    | 0   | 26         | 0          | 120051   | FALSE | FALSE | 106047500_106051500_106169521_106169581 | 1  |
| OPM-2     | 14 | 106047500 | 106051500 | 14 | 106171477 | 106171778 | 2    | 0   | 6          | 7          | 122127.5 | FALSE | FALSE | 106047500_106051500_106171477_106171778 | 1  |
| OPM-2     | 14 | 106053000 | 106057000 | 14 | 106057339 | 106057578 | 2    | 0   | 0          | 30.5       | 2458.5   | FALSE | FALSE | 106053000_106057000_106057339_106057578 | 1  |
| OPM-2     | 14 | 106053000 | 106057000 | 14 | 106174529 | 106174603 | 3    | 0   | 43.5       | 0          | 119566   | FALSE | FALSE | 106053000_106057000_106174529_106174603 | 1  |
| OPM-2     | 14 | 106053000 | 106057000 | 14 | 106188881 | 106188906 | 3    | 0   | 6.3333333  | 10.3333333 | 133893.5 | FALSE | FALSE | 106053000_106057000_106188881_106188906 | 1  |
| OPM-2     | 14 | 106063239 | 106063492 | 14 | 106184500 | 106188500 | 2    | 0   | 20         | 0          | 123134.5 | FALSE | FALSE | 106063239_106063492_106184500_106188500 | 1  |
| OPM-2     | 14 | 106063852 | 106064086 | 14 | 106184500 | 106188500 | 2    | 0   | 8.5        | 0          | 122531   | FALSE | FALSE | 106063852_106064086_106184500_106188500 | 1  |
| OPM-2     | 14 | 106099117 | 106099230 | 14 | 106192000 | 106196000 | 3    | 0   | 0          | 39         | 94826.5  | FALSE | FALSE | 106099117_106099230_106192000_106196000 | 1  |
| OPM-2     | 14 | 106106500 | 106110500 | 14 | 106133811 | 106133912 | 2    | 0   | 0          | 5.3333333  | 25361.5  | FALSE | FALSE | 106106500_106110500_106133811_106133912 | 1  |
| OPM-2     | 14 | 106106500 | 106110500 | 14 | 106218004 | 106218260 | 2    | 0   | 0          | 0          | 98457    | FALSE | FALSE | 106106500_106110500_106218004_106218260 | 1  |
| OPM-2     | 14 | 106111000 | 106115000 | 14 | 106210975 | 106210957 | 3    | 0   | 0          | 11         | 68864    | FALSE | FALSE | 106111000_106115000_106210975_106       |    |

|        |    |           |           |    |           |           |      |      |             |             |          |       |       |                                         |    |
|--------|----|-----------|-----------|----|-----------|-----------|------|------|-------------|-------------|----------|-------|-------|-----------------------------------------|----|
| IM-9   | 14 | 106328500 | 106325000 | 14 | 10667613  | 106667675 | 2    | 0    | 60          | 0           | 337144   | FALSE | FALSE | 106328500_106325000_106667613_106667675 | 1  |
| IM-9   | 14 | 106549693 | 106549798 | 14 | 106550000 | 106554000 | 2    | 29   | 60          | 0           | 2254.5   | TRUE  | FALSE | 106549693_106549798_106550000_106554000 | 1  |
| IM-9   | 14 | 106711685 | 106711771 | 14 | 106712000 | 106716000 | 2    | 17   | 60          | 0           | 2272     | TRUE  | FALSE | 106711685_106711771_106712000_106716000 | 1  |
| IM-9   | 14 | 106714179 | 106714293 | 14 | 106714500 | 106718500 | 2    | 19   | 41.22222222 | 44.55555556 | 2264     | TRUE  | FALSE | 106714179_106714293_106714500_106718500 | 1  |
| IM-9   | 14 | 106725500 | 106729500 | 14 | 106729748 | 106729844 | 6    | 1    | 58.5        | 60          | 2296     | TRUE  | FALSE | 106725500_106729500_106729748_106729844 | 1  |
| IM-9   | 14 | 10677589  | 10677721  | 14 | 106778000 | 106782000 | 2    | 1    | 60          | 57.7142857  | 2335     | TRUE  | FALSE | 10677589_10677721_106778000_106782000   | 1  |
| IM-9   | 14 | 106789300 | 106818500 | 14 | 106818500 | 106818500 | 2    | 0    | 0           | 0           | 2736.5   | FALSE | FALSE | 106789300_106818500_106818500_106818500 | 1  |
| IM-9   | 14 | 106789500 | 106793500 | 14 | 106814500 | 106818500 | 19   | 39   | 4.21053632  | 5.15        | 25000    | FALSE | FALSE | 106789500_106793500_106814500_106818500 | 1  |
| IM-9   | 14 | 106789500 | 106793500 | 14 | 106817000 | 106821000 | 7    | 11   | 1.42857143  | 4           | 279500   | FALSE | FALSE | 106789500_106793500_106817000_106821000 | 1  |
| IM-9   | 14 | 106789500 | 106793500 | 14 | 106793701 | 106793882 | 32   | 4    | 9.5625      | 9.5625      | 2291.5   | FALSE | FALSE | 106789500_106793500_106793701_106793882 | 1  |
| IM-9   | 14 | 106794532 | 106794606 | 14 | 106817000 | 106821000 | 3    | 0    | 38.66666667 | 7.66666667  | 24431    | TRUE  | FALSE | 106794532_106794606_106817000_106821000 | 1  |
| IM-9   | 14 | 106795014 | 106795078 | 14 | 106817000 | 106821000 | 2    | 0    | 12          | 0           | 23954    | FALSE | FALSE | 106795014_106795078_106817000_106821000 | 1  |
| IM-9   | 14 | 106795367 | 106795539 | 14 | 106817000 | 106821000 | 4    | 3    | 0           | 5           | 23547    | FALSE | FALSE | 106795367_106795539_106817000_106821000 | 1  |
| IM-9   | 14 | 106796152 | 106796291 | 14 | 106796500 | 106800500 | 7    | 9    | 45.3428571  | 38.9116747  | 2278.5   | TRUE  | FALSE | 106796152_106796291_106796500_106800500 | 1  |
| IM-9   | 14 | 106811000 | 106815000 | 14 | 106814500 | 106818500 | 182  | 476  | 5.16483516  | 5.15934066  | 3500     | FALSE | FALSE | 106811000_106815000_106814500_106818500 | 1  |
| IM-9   | 14 | 106815500 | 106819500 | 14 | 106817000 | 106821000 | 3665 | 1713 | 20.6016371  | 20.1200546  | 1500     | FALSE | FALSE | 106815500_106819500_106817000_106821000 | 4  |
| IM-9   | 14 | 106815500 | 106819500 | 14 | 106917000 | 106921000 | 1    | 0    | 0           | 57          | 101500   | FALSE | FALSE | 106815500_106819500_106917000_106921000 | 1  |
| IM-9   | 14 | 106815500 | 106819500 | 14 | 107011150 | 107014118 | 3    | 1    | 20.66666667 | 5.33333333  | 283784   | FALSE | FALSE | 106815500_106819500_107011150_107014118 | 1  |
| IM-9   | 14 | 106859500 | 106863500 | 14 | 106861500 | 106865500 | 85   | 80   | 40.2235294  | 48.4588235  | 2000     | TRUE  | FALSE | 106859500_106863500_106861500_106865500 | 7  |
| IM-9   | 14 | 106859500 | 106863500 | 14 | 106862500 | 106866500 | 1    | 3    | 60          | 40          | 3000     | FALSE | FALSE | 106859500_106863500_106862500_106866500 | 7  |
| IM-9   | 14 | 106859500 | 106863500 | 14 | 106870000 | 106880500 | 3    | 0    | 0           | 13.66666667 | 79279.5  | FALSE | FALSE | 106859500_106863500_106870000_106880500 | 1  |
| IM-9   | 14 | 106881000 | 106885000 | 14 | 106884000 | 106888000 | 3    | 20   | 0           | 0           | 3000     | FALSE | FALSE | 106881000_106885000_106884000_106888000 | 5  |
| IM-9   | 14 | 106940500 | 106944500 | 14 | 106944701 | 106944990 | 3    | 2    | 60          | 60          | 2345.5   | TRUE  | FALSE | 106940500_106944500_106944701_106944990 | 1  |
| IM-9   | 14 | 107093204 | 107093369 | 14 | 107271500 | 107275500 | 4    | 0    | 58.75       | 31          | 180213.5 | TRUE  | FALSE | 107093204_107093369_107271500_107275500 | 1  |
| IM-9   | 14 | 107146970 | 107147297 | 14 | 107147500 | 107151500 | 5    | 4    | 60          | 60          | 2366.5   | TRUE  | FALSE | 107146970_107147297_107147500_107151500 | 1  |
| IM-9   | 14 | 107182500 | 107186500 | 14 | 107186722 | 107186854 | 13   | 7    | 60          | 60          | 2288     | TRUE  | FALSE | 107182500_107186500_107186722_107186854 | 1  |
| IM-9   | 14 | 107262000 | 107266000 | 14 | 107265500 | 107269500 | 1    | 14   | 60          | 44          | 3500     | TRUE  | FALSE | 107262000_107266000_107265500_107269500 | 15 |
| IM-9   | 14 | 107268500 | 107272500 | 14 | 107271500 | 107275500 | 255  | 372  | 45.7215686  | 52.1098039  | 3000     | TRUE  | FALSE | 107268500_107272500_107271500_107275500 | 15 |
| KMS-11 | 14 | 106042500 | 106046500 | 14 | 106045000 | 106049000 | 1515 | 46   | 4.31551155  | 4.14521452  | 2500     | FALSE | FALSE | 106042500_106046500_106045000_106049000 | 2  |
| KMS-11 | 14 | 106042500 | 106046500 | 14 | 106046500 | 106050500 | 57   | 0    | 2.80701754  | 2.98245614  | 4000     | FALSE | TRUE  | 106042500_106046500_106046500_106050500 | 1  |
| KMS-11 | 14 | 106042500 | 106046500 | 14 | 106161500 | 106165500 | 1    | 0    | 0           | 0           | 119000   | FALSE | FALSE | 106042500_106046500_106161500_106165500 | 2  |
| KMS-11 | 14 | 106042500 | 106046500 | 14 | 106164000 | 106168000 | 18   | 1    | 1.11111111  | 1.83333333  | 121500   | FALSE | FALSE | 106042500_106046500_106164000_106168000 | 1  |
| KMS-11 | 14 | 106047500 | 106051500 | 14 | 106164500 | 106168000 | 3    | 0    | 9.66666667  | 40          | 116500   | TRUE  | FALSE | 106047500_106051500_106164500_106168000 | 3  |
| KMS-11 | 14 | 106209000 | 106213000 | 14 | 106238500 | 106242500 | 1    | 0    | 0           | 0           | 29500    | FALSE | FALSE | 106209000_106213000_106238500_106242500 | 2  |
| KMS-11 | 14 | 106371000 | 106375000 | 14 | 106380500 | 106384500 | 9    | 0    | 35.44444444 | 47.44444444 | 9500     | TRUE  | FALSE | 106371000_106375000_106380500_106384500 | 1  |
| KMS-11 | 14 | 106781000 | 106785000 | 14 | 106807000 | 106811000 | 2    | 12   | 0           | 14.5        | 26000    | FALSE | FALSE | 106781000_106785000_106807000_106811000 | 2  |
| KMS-11 | 14 | 106859500 | 106863500 | 14 | 106861500 | 106865500 | 50   | 80   | 40.74       | 48.8        | 2000     | TRUE  | FALSE | 106859500_106863500_106861500_106865500 | 7  |
| KMS-11 | 14 | 106859500 | 106863500 | 14 | 106862500 | 106866500 | 1    | 3    | 44          | 27          | 3000     | FALSE | FALSE | 106859500_106863500_106862500_106866500 | 5  |
| KMS-11 | 14 | 106881000 | 106885000 | 14 | 106884000 | 106888000 | 2    | 20   | 5           | 5           | 3000     | FALSE | FALSE | 106881000_106885000_106884000_106888000 | 5  |
| KMS-11 | 14 | 106022500 | 106026500 | 14 | 106026707 | 106026782 | 12   | 0    | 0           | 0           | 2244.5   | FALSE | TRUE  | 106022500_106026500_106026707_106026782 | 1  |
| KMS-11 | 14 | 106022500 | 106026500 | 14 | 106144119 | 106144193 | 2    | 0    | 0           | 43          | 119656   | FALSE | FALSE | 106022500_106026500_106144119_106144193 | 1  |
| KMS-11 | 14 | 106022500 | 106026500 | 14 | 106144827 | 106144901 | 1    | 0    | 27          | 0           | 120364   | FALSE | FALSE | 106022500_106026500_106144827_106144901 | 1  |
| KMS-11 | 14 | 106022500 | 106026500 | 14 | 106145552 | 106145628 | 2    | 0    | 6           | 0           | 121090   | FALSE | FALSE | 106022500_106026500_106145552_106145628 | 1  |
| KMS-11 | 14 | 106022500 | 106026500 | 14 | 106146135 | 106146481 | 4    | 0    | 5.25        | 0           | 121808   | FALSE | FALSE | 106022500_106026500_106146135_106146481 | 1  |
| KMS-11 | 14 | 106022500 | 106026500 | 14 | 106146827 | 106147077 | 3    | 0    | 0           | 0           | 122452   | FALSE | FALSE | 106022500_106026500_106146827_106147077 | 1  |
| KMS-11 | 14 | 106047500 | 106051500 | 14 | 106169515 | 106169585 | 6    | 0    | 29          | 0           | 120050   | FALSE | FALSE | 106047500_106051500_106169515_106169585 | 1  |
| KMS-11 | 14 | 106047500 | 106051500 | 14 | 106170033 | 106170142 | 3    | 0    | 2.33333333  | 11          | 120572.5 | FALSE | FALSE | 106047500_106051500_106170033_106170142 | 1  |
| KMS-11 | 14 | 106047500 | 106051500 | 14 | 106171136 | 106171254 | 6    | 0    | 12.66666667 | 0           | 121695   | FALSE | FALSE | 106047500_106051500_106171136_106171254 | 1  |
| KMS-11 | 14 | 106112000 | 106116000 | 14 | 106116100 | 106116546 | 3    | 0    | 51.33333333 | 38.66666667 | 2473     | TRUE  | FALSE | 106112000_106116000_106116100_106116546 | 1  |
| KMS-11 | 14 | 106112000 | 106116000 | 14 | 106120697 | 106120773 | 3    | 0    | 2           | 26          | 96735    | FALSE | FALSE | 106112000_106116000_106120697_106120773 | 1  |
| KMS-11 | 14 | 106800551 | 106800898 | 14 | 106819200 | 106819650 | 3    | 0    | 9.66666667  | 11.33333333 | 113725.5 | FALSE | FALSE | 106800551_106800898_106819200_106819650 | 1  |
| KMS-11 | 14 | 106112000 | 106116000 | 14 | 106238500 | 106242500 | 114  | 0    | 33.5438596  | 56.8        | 126500   | TRUE  | TRUE  | 106112000_106116000_106238500_106242500 | 1  |
| KMS-11 | 14 | 106093621 | 106093678 | 14 | 106238500 | 106242500 | 2    | 0    | 5.5         | 0           | 146850.5 | FALSE | FALSE | 106093621_106093678_106238500_106242500 | 1  |
| KMS-11 | 14 | 106094864 | 106094938 | 14 | 106238500 | 106242500 | 2    | 0    | 0           | 60          | 145599   | FALSE | FALSE | 106094864_106094938_106238500_106242500 | 1  |
| KMS-11 | 14 | 106328500 | 106332500 | 14 | 106351911 | 106351992 | 4    | 0    | 42          | 0           | 21451.5  | FALSE | FALSE | 106328500_106332500_106351911_106351992 | 1  |
| KMS-11 | 14 | 106328500 | 106332500 | 14 | 106361519 | 106361600 | 4    | 0    | 48.75       | 0           | 31059.5  | FALSE | FALSE | 106328500_106332500_106361519_106361600 | 1  |
| KMS-11 | 14 | 106351918 | 106351992 | 14 | 106368500 | 106372500 | 2    | 0    | 0           | 60          | 18545    | FALSE | FALSE | 106351918_106351992_106368500_106372500 | 1  |
| KMS-11 | 14 | 106361527 | 106361601 | 14 | 106368500 | 106372500 | 4    | 0    | 0           | 53.66666667 | 8936     | FALSE | FALSE | 106361527_106361601_106368500_106372500 | 1  |
| KMS-11 | 14 | 106711722 | 106711796 | 14 | 106712000 | 106716000 | 2    | 26   | 60          | 60          | 2241     | FALSE | FALSE | 106711722_106711796_106712000_106716000 | 1  |
| KMS-11 | 14 | 106725500 | 106729500 | 14 | 106729711 | 106729819 | 9    | 5    | 59.55555556 | 60          | 2265     | TRUE  | FALSE | 106725500_106729500_106729711_106729819 | 1  |
| KMS-11 | 14 | 106820681 | 106820790 | 14 | 106821000 | 106825000 | 3    | 7    | 28.55555556 | 26.66666667 | 2264.5   | FALSE | FALSE | 106820681_106820790_106821000_106825000 | 1  |
| KMS-11 | 14 | 106940500 | 106944500 | 14 | 106944715 | 106944823 | 8    | 1    | 60          | 60          | 2269     | TRUE  | FALSE | 106940500_106944500_106944715_106944823 | 1  |
| KMS-11 | 14 | 106533863 | 106536960 | 14 | 106905000 | 106904500 | 221  | 0    | 38.5        | 30          | 425588.5 | TRUE  | FALSE | 106533863_106536960_106905000_106904500 | 1  |
| MC-CAR | 14 | 106072000 | 106076000 | 14 | 106076000 | 106080000 | 221  | 29   | 22.1809955  | 22.0452489  | 4000     | FALSE | FALSE | 106072000_106076000_106076000_106080000 | 17 |
| MC-CAR | 14 | 106082500 | 106086500 | 14 | 106104500 | 106108500 | 3790 | 114  | 30.4994723  | 28.8976253  | 1500     | TRUE  | FALSE | 106082500_106086500_106104500_106108500 | 5  |
| MC-CAR | 14 | 106082500 | 106086500 | 14 | 106104500 | 106108500 | 5    | 0    | 12          | 2.4         | 22000    |       |       |                                         |    |

|           |    |           |           |    |           |           |     |     |            |             |          |       |       |                                         |    |
|-----------|----|-----------|-----------|----|-----------|-----------|-----|-----|------------|-------------|----------|-------|-------|-----------------------------------------|----|
| MC-CAR    | 14 | 106789500 | 106793500 | 14 | 106818005 | 106818080 | 2   | 0   | 0          | 0           | 2642.5   | FALSE | FALSE | 106789500_106793500_106818005_106818080 | 1  |
| MC-CAR    | 14 | 106789500 | 106793500 | 14 | 107048552 | 107048772 | 2   | 0   | 0          | 11.5        | 257162   | FALSE | FALSE | 106789500_106793500_107048552_107048772 | 1  |
| MC-CAR    | 14 | 106789500 | 106793500 | 14 | 107083254 | 107083380 | 10  | 0   | 0.3        | 0           | 291817   | FALSE | TRUE  | 106789500_106793500_107083254_107083380 | 1  |
| MC-CAR    | 14 | 106789500 | 106793500 | 14 | 107095138 | 107095232 | 5   | 0   | 0          | 0           | 303685   | FALSE | FALSE | 106789500_106793500_107095138_107095232 | 1  |
| MC-CAR    | 14 | 106796193 | 106796287 | 14 | 106796500 | 106800500 | 2   | 7   | 42.5       | 36          | 2260     | TRUE  | FALSE | 106796193_106796287_106796500_106800500 | 1  |
| MC-CAR    | 14 | 106712815 | 106712943 | 14 | 107011000 | 107015000 | 4   | 18  | 50.5       | 28.5        | 300121   | TRUE  | FALSE | 106712815_106712943_107011000_107015000 | 1  |
| MC-CAR    | 14 | 107045000 | 107049000 | 14 | 107083254 | 107083414 | 12  | 0   | 5          | 0           | 36334    | FALSE | TRUE  | 107045000_107049000_107083254_107083414 | 1  |
| MC-CAR    | 14 | 107045000 | 107049000 | 14 | 107095124 | 107095282 | 16  | 0   | 19.9375    | 0           | 48203    | FALSE | TRUE  | 107045000_107049000_107095124_107095282 | 1  |
| MC-CAR    | 14 | 107084605 | 107084782 | 14 | 107085000 | 107089000 | 3   | 3   | 44.25      | 54.1875     | 2306.5   | TRUE  | FALSE | 107084605_107084782_107085000_107089000 | 1  |
| MC-CAR    | 14 | 107147203 | 107147285 | 14 | 107145000 | 107151500 | 2   | 3   | 60         | 60          | 2256     | FALSE | FALSE | 107147203_107147285_107145000_107151500 | 1  |
| MC-CAR    | 14 | 106811205 | 106811378 | 14 | 107271500 | 107275500 | 3   | 0   | 0          | 3.33333333  | 462208.5 | FALSE | FALSE | 106811205_106811378_107271500_107275500 | 1  |
| KMS-12-BM | 14 | 106316000 | 106320000 | 14 | 106325000 | 106329000 | 40  | 0   | 54.4       | 58.575      | 9000     | TRUE  | TRUE  | 106316000_106320000_106325000_106329000 | 1  |
| MM15      | 14 | 106327500 | 106331500 | 14 | 106326869 | 106327663 | 4   | 0   | 60         | 12          | 53226    | TRUE  | FALSE | 106327500_106331500_106326869_106327663 | 1  |
| KMS-12-BM | 14 | 106328000 | 106332000 | 14 | 106345500 | 106349500 | 16  | 0   | 43.5       | 42.8125     | 17500    | TRUE  | TRUE  | 106328000_106332000_106345500_106349500 | 1  |
| MM15      | 14 | 106327500 | 106331500 | 14 | 106815720 | 106815857 | 3   | 0   | 60         | 0           | 486288.5 | FALSE | FALSE | 106327500_106331500_106815720_106815857 | 1  |
| MM15      | 14 | 106327500 | 106331500 | 14 | 107131031 | 107131154 | 3   | 0   | 60         | 0           | 801592.5 | FALSE | FALSE | 106327500_106331500_107131031_107131154 | 1  |
| NCI-H929  | 14 | 106072000 | 106076000 | 14 | 106076000 | 106080000 | 224 | 29  | 23.0848214 | 23.46875    | 4000     | FALSE | FALSE | 106072000_106076000_106076000_106080000 | 17 |
| NCI-H929  | 14 | 106082500 | 106086500 | 14 | 106103500 | 106107500 | 24  | 0   | 9.375      | 8.54166667  | 21000    | FALSE | TRUE  | 106082500_106086500_106103500_106107500 | 6  |
| KMS-12-BM | 14 | 106355500 | 106359500 | 14 | 107168000 | 107172000 | 25  | 0   | 32.12      | 25.48       | 812500   | TRUE  | TRUE  | 106355500_106359500_107168000_107172000 | 1  |
| NCI-H929  | 14 | 106859500 | 106863500 | 14 | 106861500 | 106865500 | 68  | 80  | 35.0441176 | 41.1029412  | 2000     | FALSE | FALSE | 106859500_106863500_106861500_106865500 | 7  |
| NCI-H929  | 14 | 106859500 | 106863500 | 14 | 106865500 | 106869500 | 4   | 3   | 32.5       | 32.5        | 3000     | TRUE  | FALSE | 106859500_106863500_106865500_106869500 | 1  |
| NCI-H929  | 14 | 107262000 | 107266000 | 14 | 107265500 | 107269500 | 8   | 14  | 54         | 53.25       | 3500     | TRUE  | FALSE | 107262000_107266000_107265500_107269500 | 15 |
| NCI-H929  | 14 | 107268500 | 107272500 | 14 | 107271500 | 107275500 | 216 | 372 | 47.1296296 | 51.9166667  | 3000     | TRUE  | FALSE | 107268500_107272500_107271500_107275500 | 15 |
| NCI-H929  | 14 | 106072000 | 106076000 | 14 | 106118857 | 106119326 | 4   | 0   | 10.25      | 0           | 45091.5  | FALSE | FALSE | 106072000_106076000_106118857_106119326 | 1  |
| NCI-H929  | 14 | 106072000 | 106076000 | 14 | 106119571 | 106119768 | 2   | 0   | 6.5        | 13          | 45669.5  | FALSE | FALSE | 106072000_106076000_106119571_106119768 | 1  |
| NCI-H929  | 14 | 106072000 | 106076000 | 14 | 106217204 | 106217278 | 2   | 0   | 30         | 0           | 143241   | FALSE | FALSE | 106072000_106076000_106217204_106217278 | 2  |
| NCI-H929  | 14 | 106072000 | 106076000 | 14 | 106218011 | 106218208 | 5   | 0   | 9          | 0           | 144109.5 | FALSE | FALSE | 106072000_106076000_106218011_106218208 | 1  |
| NCI-H929  | 14 | 106082500 | 106086500 | 14 | 106086707 | 106086852 | 23  | 0   | 22.7826087 | 28.0454545  | 2279.5   | FALSE | TRUE  | 106082500_106086500_106086707_106086852 | 1  |
| NCI-H929  | 14 | 106082500 | 106086500 | 14 | 106102228 | 106102577 | 20  | 1   | 25.6       | 4.55        | 17902.5  | FALSE | FALSE | 106082500_106086500_106102228_106102577 | 1  |
| NCI-H929  | 14 | 106082500 | 106086500 | 14 | 106128940 | 106129249 | 3   | 0   | 50.6666667 | 3           | 44594.5  | TRUE  | FALSE | 106082500_106086500_106128940_106129249 | 1  |
| NCI-H929  | 14 | 106082500 | 106086500 | 14 | 106198106 | 106198184 | 3   | 1   | 56.3333333 | 7.66666667  | 113645   | FALSE | FALSE | 106082500_106086500_106198106_106198184 | 1  |
| NCI-H929  | 14 | 106082500 | 106086500 | 14 | 106200437 | 106200972 | 16  | 0   | 10.4375    | 0.5625      | 116204.5 | FALSE | TRUE  | 106082500_106086500_106200437_106200972 | 1  |
| NCI-H929  | 14 | 106082500 | 106086500 | 14 | 106201246 | 106201494 | 5   | 0   | 0          | 0           | 116870   | FALSE | FALSE | 106082500_106086500_106201246_106201494 | 1  |
| NCI-H929  | 14 | 106082500 | 106086500 | 14 | 106202014 | 106202240 | 3   | 0   | 3          | 0           | 117627   | FALSE | FALSE | 106082500_106086500_106202014_106202240 | 1  |
| NCI-H929  | 14 | 106082500 | 106086500 | 14 | 106227198 | 106227310 | 58  | 5   | 45.9310345 | 55.7758621  | 142754   | TRUE  | FALSE | 106082500_106086500_106227198_106227310 | 1  |
| KMS-12-BM | 14 | 106078500 | 106082500 | 14 | 106197130 | 106197315 | 16  | 0   | 0.5625     | 32.875      | 116722.5 | TRUE  | TRUE  | 106078500_106082500_106197130_106197315 | 1  |
| NCI-H929  | 14 | 106082500 | 106086500 | 14 | 106229302 | 106229503 | 3   | 0   | 0          | 0           | 144902.5 | FALSE | FALSE | 106082500_106086500_106229302_106229503 | 1  |
| NCI-H929  | 14 | 106094634 | 106094792 | 14 | 106095000 | 106099000 | 7   | 0   | 54.3888889 | 52.5555556  | 2287     | TRUE  | FALSE | 106094634_106094792_106095000_106099000 | 1  |
| NCI-H929  | 14 | 106098500 | 106102500 | 14 | 106197250 | 106197353 | 3   | 0   | 6          | 9           | 96801.5  | FALSE | FALSE | 106098500_106102500_106197250_106197353 | 1  |
| NCI-H929  | 14 | 106098500 | 106102500 | 14 | 106197554 | 106197628 | 2   | 0   | 0          | 6           | 97091    | FALSE | FALSE | 106098500_106102500_106197554_106197628 | 1  |
| NCI-H929  | 14 | 106098500 | 106102500 | 14 | 106225680 | 106226014 | 3   | 0   | 3.33333333 | 2.33333333  | 125347   | FALSE | FALSE | 106098500_106102500_106225680_106226014 | 1  |
| NCI-H929  | 14 | 106098500 | 106102500 | 14 | 106226582 | 106226895 | 1   | 1   | 0.2        | 11          | 126238.5 | FALSE | FALSE | 106098500_106102500_106226582_106226895 | 1  |
| NCI-H929  | 14 | 106086562 | 106086914 | 14 | 106103500 | 106107500 | 3   | 1   | 2.66666667 | 7           | 18762    | FALSE | FALSE | 106086562_106086914_106103500_106107500 | 1  |
| NCI-H929  | 14 | 106087401 | 106087680 | 14 | 106103500 | 106107500 | 2   | 0   | 1.33333333 | 0.5         | 17959.5  | FALSE | FALSE | 106087401_106087680_106103500_106107500 | 1  |
| NCI-H929  | 14 | 106088160 | 106088242 | 14 | 106103500 | 106107500 | 2   | 0   | 0          | 0           | 17299    | FALSE | FALSE | 106088160_106088242_106103500_106107500 | 1  |
| NCI-H929  | 14 | 106134500 | 106138500 | 14 | 106138719 | 106138793 | 6   | 0   | 0          | 0           | 2256     | FALSE | FALSE | 106134500_106138500_106138719_106138793 | 1  |
| NCI-H929  | 14 | 106143000 | 106147000 | 14 | 106147309 | 106147376 | 9   | 0   | 15         | 15          | 2289.5   | FALSE | FALSE | 106143000_106147000_106147309_106147376 | 1  |
| NCI-H929  | 14 | 106045961 | 106046424 | 14 | 106163000 | 106167000 | 6   | 0   | 2.83333333 | 11.66666667 | 118807.5 | FALSE | FALSE | 106045961_106046424_106163000_106167000 | 1  |
| NCI-H929  | 14 | 106162692 | 106162766 | 14 | 106163000 | 106167000 | 2   | 0   | 0.5        | 0.5         | 2271     | FALSE | FALSE | 106162692_106162766_106163000_106167000 | 1  |
| NCI-H929  | 14 | 106070536 | 106070738 | 14 | 106189000 | 106193000 | 14  | 1   | 7.64285714 | 0           | 120363   | FALSE | FALSE | 106070536_106070738_106189000_106193000 | 1  |
| NCI-H929  | 14 | 106078500 | 106082500 | 14 | 106197130 | 106197315 | 16  | 0   | 0.5625     | 32.875      | 116722.5 | TRUE  | TRUE  | 106078500_106082500_106197130_106197315 | 1  |
| NCI-H929  | 14 | 106030415 | 106030722 | 14 | 106580000 | 106584000 | 4   | 0   | 9          | 5           | 551431.5 | FALSE | FALSE | 106030415_106030722_106580000_106584000 | 1  |
| KMS-12-BM | 14 | 106213076 | 106213403 | 14 | 106325000 | 106329000 | 40  | 0   | 22.8918919 | 60          | 113760.5 | TRUE  | TRUE  | 106213076_106213403_106325000_106329000 | 1  |
| NCI-H929  | 14 | 106579608 | 106579682 | 14 | 106580000 | 106584000 | 2   | 0   | 18         | 18          | 2355     | FALSE | FALSE | 106579608_106579682_106580000_106584000 | 1  |
| NCI-H929  | 14 | 106711658 | 106711779 | 14 | 106712000 | 106716000 | 2   | 20  | 60         | 60          | 2281.5   | TRUE  | FALSE | 106711658_106711779_106712000_106716000 | 1  |
| NCI-H929  | 14 | 106714156 | 106714296 | 14 | 106714500 | 106718500 | 6   | 22  | 48.1538462 | 41.6923077  | 2274     | FALSE | FALSE | 106714156_106714296_106714500_106718500 | 1  |
| NCI-H929  | 14 | 106725500 | 106729500 | 14 | 106729718 | 106729871 | 13  | 4   | 60         | 60          | 2294.5   | TRUE  | FALSE | 106725500_106729500_106729718_106729871 | 1  |
| NCI-H929  | 14 | 106475954 | 106476175 | 14 | 106738000 | 106782000 | 2   | 1   | 4.33333333 | 49.33333333 | 303935.5 | TRUE  | FALSE | 106475954_106476175_106738000_106782000 | 1  |
| NCI-H929  | 14 | 106788500 | 106792500 | 14 | 106792735 | 106792826 | 11  | 1   | 21.8181818 | 21.8181818  | 2280.5   | FALSE | FALSE | 106788500_106792500_106792735_106792826 | 1  |
| NCI-H929  | 14 | 106788500 | 106792500 | 14 | 106813523 | 106813618 | 9   | 4   | 14.1111111 | 0           | 23070.5  | FALSE | FALSE | 106788500_106792500_106813523_106813618 | 1  |
| NCI-H929  | 14 | 106788500 | 106792500 | 14 | 106815718 | 106816201 | 4   | 5   | 10.25      | 0           | 25459.5  | FALSE | FALSE | 106788500_106792500_106815718_106816201 | 1  |
| NCI-H929  | 14 | 106788500 | 106792500 | 14 | 106816933 | 106816933 | 2   | 0   | 13.5       | 15          | 26341.5  | FALSE | FALSE | 106788500_106792500_106816933_106816933 | 1  |
| NCI-H929  | 14 | 106788500 | 106792500 | 14 | 106817363 | 106817374 | 1   | 0   | 0          | 0           | 26818.5  | FALSE | FALSE | 106788500_106792500_106817363_106817374 | 1  |
| NCI-H929  | 14 | 106796137 | 106796284 | 14 | 106796500 | 106800500 | 5   | 5   | 41.5454545 | 37.8181818  | 2289.5   | TRUE  | FALSE | 106796137_106796284_106796500_106800500 | 1  |
| NCI-H929  | 14 | 106835500 | 106839500 | 14 | 106839720 | 106839835 | 9   | 7   | 60         | 60          | 2277.5   | TRUE  | FALSE | 106835500_106839500_106839720_106839835 | 1  |
|           |    |           |           |    |           |           |     |     |            |             |          |       |       |                                         |    |
